# Supplementary material for: Development of Rapidly Evolving Intron Markers to Estimate Multilocus Species Trees of Rodents
Source: PubMed Central journal article supplement (PMC4012946; doi:10.1371/journal.pone.0096032), 2014-05-07

ENSMUSG00000022469 intron 14

Description: Rap guanine nucleotide exchange factor 3 (Rapgef3)  
 Intron number: 14  
 Mouse chromosome: 15  
 Upstream exon length: 83  
 Downstream exon length: 40  
 Mouse intron length: 538  
 Intron alignment length: 669  
 Total murinae branch length: 0.23482  
 K\_score: 0.08642  
 Scaling factor: 0.40374

ENSMUSG00000022469 exon 14 (ORF 0)

|        |                                                                                       |    |
|--------|---------------------------------------------------------------------------------------|----|
| Mus    | AAACTCTCAGACCTGGTGAAGCAGAGATGCCCGACTTAGCAACTTGCTGAGGGAAACAGTATCCAGAGAGAGACGGGGGACACCA | 80 |
| Rattus | AAACTCTCAGACCTGGTGAAGCAGAGATGCCCGACTTAGCAACTTGCTGAGGGAAACAGTATCCGGAGAGAGACGGGGGACACCA | 80 |
| Cavia  | AAACTCTCTGACCTGGTGAAGCAGAGATGCCCGGCTCAGCAACCTAAGTGAAGGAAACAGTGGCCAGAGAGACGGGGGACATCA  | 80 |
| Homo   | AAACTCTCAGACCTGGTGGCAGGATGCCCGACTCAGCAACCTGCTGAGGGAAACAGTGGCCAGAGAGACGGGGGATCCA       | 80 |

  

|        |     |    |
|--------|-----|----|
| Mus    | CAG | 83 |
| Rattus | CAG | 83 |
| Cavia  | CAG | 83 |
| Homo   | CAG | 83 |

ENSMUSG00000022469 exon 15 (ORF 1)

|        |                                             |    |
|--------|---------------------------------------------|----|
| Mus    | GTTGGAAAATGGCTGTGGGAAAGTATCTCCTCAGACCAAG    | 40 |
| Rattus | GTTGGAACAATGGCTGTGGGAAATGATCTCCTCAGACCAAG   | 40 |
| Cavia  | GTTGGAAAATGGCTGGGGAGTGCATCTCCAAGTTGAAAG     | 40 |
| Homo   | GTTGGAACAATGGCTGTGGGAAATGCATCTCCTCAGATGAAAG | 40 |

ENSMUSG00000022469\_intron\_14

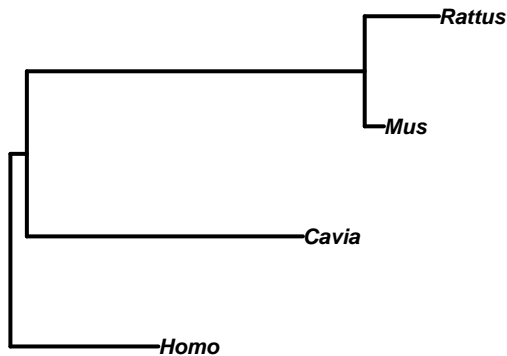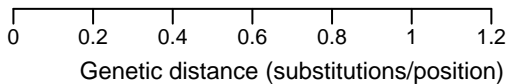

Mus 61  
Rattus 64  
Cavia 61  
Homo 110  
Mus 147  
Rattus 128  
Cavia 198  
Homo 220  
Mus 248  
Rattus 223  
Cavia 286  
Homo 327  
Mus 329  
Rattus 299  
Cavia 286  
Homo 437  
Mus 431  
Rattus 400  
Cavia 312  
Homo 546  
Mus 530  
Rattus 502  
Cavia 399  
Homo 636  
Mus 538  
Rattus 510  
Cavia 408  
Homo 644

ENSMUSG00000021238 intron 2

Description: Methylmalonate-semialdehyde dehydrogenase (Aldh6a1)  
 Intron number: 2  
 Mouse chromosome: 12  
 Upstream exon length: 60  
 Downstream exon length: 75  
 Mouse intron length: 1583  
 Intron alignment length: 3383  
 Total murinae branch length: 0.18311  
 K\_score: 0.07773  
 Scaling factor: 0.46395

ENSMUSG00000021238 exon 2 (ORF 0)

|        |                                                              |    |
|--------|--------------------------------------------------------------|----|
| Mus    | GTTTCTTCTAAGGTAAGTAAATCCACATGGTATCCAGCATCTCCTTCTCTTGCATCAGTG | 60 |
| Rattus | GTTTCTTCTAAGGTAAGTAAATCCACATGGTATCCAGCATCTCCTTCTCTTGCATCAGTG | 60 |
| Cavia  | GTTTCTTCTAAGGTAAGTAAATCCACATGGTATCCAGCATCTCCTTCTCTTGCATCAGTG | 57 |
| Homo   | GTTTCTTCTAAGGTAAGTAAATCCACATGGTATCCAGCATCTCCTTCTCTTGCATCAGTG | 63 |

ENSMUSG00000021238 exon 3 (ORF 0)

|        |                                                                            |    |
|--------|----------------------------------------------------------------------------|----|
| Mus    | CCAAGTAAAGCTCTTCATTGATGGAAAATTTGTTGAATCAAAAAAGTGAATAATGGATTGACATCCACAACCCA | 75 |
| Rattus | CCAAGTAAAGCTCTTCATTGATGGAAAATTTGTTGAATCAAAAAAGTGAATAATGGATTGACATCCACAACCCA | 75 |
| Cavia  | CCAAGTAAAGCTCTTCATTGATGGAAAATTTGTTGAATCAAAAAAGTGAATAATGGATTGACATCCACAACCCA | 75 |
| Homo   | CCAAGTAAAGCTCTTCATTGATGGAAAATTTGTTGAATCAAAAAAGTGAATAATGGATTGACATCCACAACCCA | 75 |

ENSMUSG00000021238\_intron\_2

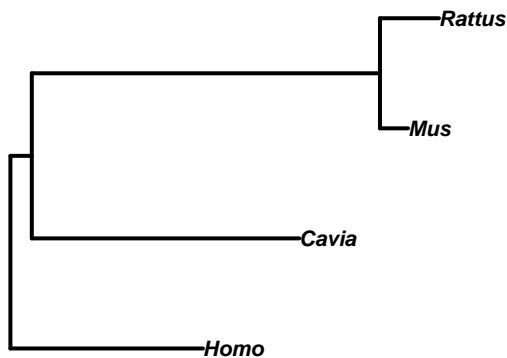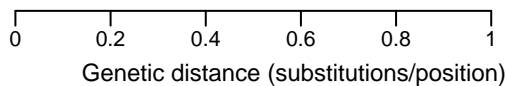



ENSMUSG00000036733 intron 6

Description: RNA-binding protein 42 (Rbm42)

Intron number: 6

Mouse chromosome: 7

Upstream exon length: 176

Downstream exon length: 333

Mouse intron length: 508

Intron alignment length: 833

Total murinae branch length: 0.18830

K\_score: 0.07239

Scaling factor: 0.46866

ENSMUSG00000036733 exon 6 (ORF 2)

|        |                                                                                        |     |
|--------|----------------------------------------------------------------------------------------|-----|
| Mus    | TGCAGCTGGTGGCCCCCGACCTATGGCCCTGAGGGCCCTCCACACCAGGCCCTGGTTGGACCCCCCTCTGCCTGGGCCCTCCCTG  | 80  |
| Rattus | TGCAGCTGGTGGCCCCCGACCTATGGCCCTGAGGGCCCTCCACACCAGGCCCTGGTTGGACCCCCCTCTGCCTGGGCCCTCCCTG  | 80  |
| Cavia  | TGCAGCAGGCTGGCCCCCGACCTATGGCCCTGAGGGCCCTCCACACCAGGCCCTGGTTGGACCCCCCTCTGCCTGGGCCCTCCCTG | 80  |
| Homo   | TGCAGCAGGCTGGCCCCCGACCTATGGCCCTAGGGCCCTCCACACCAGGCCCTGGTTGGACCCCCCTCTGCCTGGGCCCTCCCTG  | 80  |
| Mus    | GACCACCCATGATGCTGCCACCAATGGCTCGGGCACCTGGACCACCCCTGGGTTCTATGGCTGCTCTGAGACCTCCCTG        | 160 |
| Rattus | GACCACCCATGATGCTGCCACCAATGGCTCGGGCACCTGGACCACCCCTGGGTTCTATGGCTGCTCTGAGACCTCCCTG        | 160 |
| Cavia  | GACCACCCATGATGCTGCCACCAATGGCTCGGGCACCTGGACCACCCCTGGGTTCTATGGCTGCTCTGAGACCTCCCTG        | 160 |
| Homo   | GACCACCCATGATGCTGCCACCAATGGCTCGGGCACCTGGACCACCCCTGGGTTCTATGGCTGCTCTGAGACCTCCCTG        | 160 |

ENSMUSG00000036733 exon 7 (ORF 0)

|        |                                                                                    |     |
|--------|------------------------------------------------------------------------------------|-----|
| Mus    | GAAGAGCCAGCAGCTCCAAGAGAGCTAGGCCTAGGCCTTGGTTTGGGCCTGAAAGGACAAAGGAAGAGGCAGTAGTGGCCGC | 80  |
| Rattus | GAAGAGCCAGCAGCTCCAAGAGAGCTAGGCCTAGGCCTTGGTTTGGGCCTGAAAGGACAAAGGAAGAGGCAGTAGTGGCCGC | 80  |
| Cavia  | GAAGAGCCAGCAGCACCAGAGAGCTGGGCCCTAGGCCTGGGCTTGGGCCTGAAAGGAAAGGAAGAGGCAGTAGTGGCCGC   | 80  |
| Homo   | GAAGAGCCAGCAGCACCAGAGAGCTGGGCCCTAGGCCTGGGCTTGGGCCTGAAAGGAAAGGAAGAGGCAGTAGTGGCCGC   | 80  |
| Mus    | AGCGGCTGGGCTGGAAGAAAGCTAGCGCAGCAGTGGCACTGGGGGCAGGAGGAGCCCAAGCTGGCCCTGCAGTCATTGGCC  | 160 |
| Rattus | AGCGGCTGGGCTGGAAGAAAGCTAGCGCAGCAGTGGCACTGGGGGCAGGAGGAGCCCAAGCTGGCCCTGCAGTCATTGGCC  | 160 |
| Cavia  | AGCGGCTGGGCTGGAAGAAAGCTAGCGCAGCAGTGGCACTGGGGGCAGGAGGAGCCCAAGCTGGCCCTGCAGTCATTGGCC  | 160 |
| Homo   | AGCGGCTGGGCTGGAAGAAAGCTAGCGCAGCAGTGGCACTGGGGGCAGGAGGAGCCCAAGCTGGCCCTGCAGTCATTGGCC  | 160 |

ENSMUSG00000036733\_intron\_6

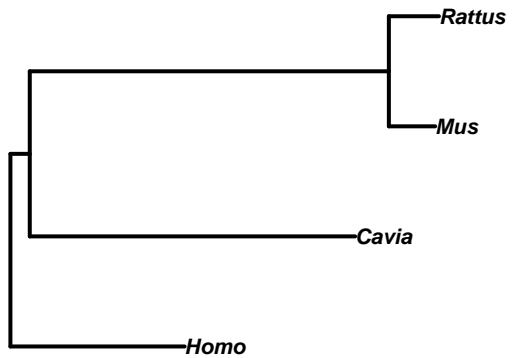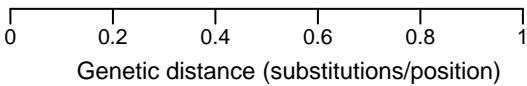

Mus Rattus Cavia Homo  
GTAAGTGGAGACTG.....CTAAGTTAAAGGGTCCCCAGCCCGGT.....GGACCCGCAGTTCACITACATGAAGTCTTCTTCC 83  
GTAAGTGGAGACTGACTACT.....ACTGTGGTTAAAGGTTT.....AAGTCTTTCTTCC 52  
GTAAGTATGGGAGCTAAIT.....GCTGTGAGTAGGAAGC.....CTTCTGTTCTTCTTCT 57  
GTGAGTGTGAAGAGGCAAGTAACGGTCAAGATGTGGGTGGAGGGGAGAGCCATGCATCGTGGCCCAATGGCTATGTGTGAGTTCGCTCTGTCTGCTGACTTTCTGTTCT 110

Mus Rattus Cavia Homo  
CAAATTTGCTTCTGCAACTTTGTAACCCATTTCTTTTATTTCTT.....TGATGGGGGGGAAACCCGAAAAA.....CTT 154  
CAAGTTTGTTCCTGTTCTTTGTAACCCGCTTTCTTTTATTTCTT.....TGATGATAAAGAAACAAAAACAAAAACACTT 128  
CAAGTTTGTTCCTGTTCTTTGTAACCCGCTTTCTTTTATTTCTT.....TGATGATAAAGAAACAAAAACAAAAACACTT 127  
CTACCTTCTTCACTCTGCTTTTGTCTCTCTCTTTCTTCTGCACTT.....TCTCTGG 167  
..... 154

Mus Rattus Cavia Homo  
GTTTTCTTTGCTCTTTGGACCAATAACTTACTATGTAGCTCAGGCTG.....GCTAGACCTTGTACTCCTCCTGCCTCTCAGCCTCCCAATGATGAGGCATGTGGACCATG 264  
GGTTTTCTTTGCTCTTTGGACCAATAACTTACTATGTAGCTCAGGCTG.....GCTAGACCTTGTACTCCTCCTGCCTCTCAGCCTCCCAATGATGAGGCATGTGGACCATG 238  
TGTGTTGTTATTTCTTTAATGAGCAATGGAGTTCAGTATCTCAAGCT.....TGGAGATAGGGAGTGTGCCACTGASCTATAAGCCGAGTGG 365  
..... 165

Mus Rattus Cavia Homo  
CGACCTTCTCCTGTGTGAAGAG...AGTCCAAAGAGAGACACCTACTGTGAATAGTTCCAT.....GTTTTCTG...TTTTG 340  
CGACCTTCTCCTGTGTGAAGAG...AGTCCAAAGAGAGACACCTACTGTGAATAGTTCCAT.....ATGTTGCTG...TTTTCTTTGATTTGCCCTTTTTA 337  
CTGATTTTCTTTTGAAGAGAA...TAGAGAGAGAGAAATGTGTGCTGGTGTATGTC.....TATTTCTATCTCTTTTCTTTGAGAGTCTGCTTATTT 462  
ATCTGTTTCTCCTTTTGTGAAGAG...AGTACAGAGAGAAACA...TGTATTGGAATATTTCTCTTTTGTATTTGTTACTGATGTTCTTGTCTCTGCTGCTCTCT 270

Mus Rattus Cavia Homo  
CTGTGTCATTCAACATCTCTTTGCTCCCTGCATTTCTCTGCCCAGCTACTGTAAC.....TCTTTGCTCAGCGTTGCTGGCCTCCAGACCTTGTCTGTG... 440  
CTATGTCATTCAACAT...CTTTGCTCCCTGCATTTCTCTCTCCAGCTACTTACT.....TCTTTGCTCACTGTTGCTGGCCTCCAGGCCCTTGTCTCA... 434  
CTGTTTTGTTTTTACC...ACTGCTCTCTGCATATGTTGAGGCTTTCTGCTTACTAGAGACCTCTTTCTTACCTGTTCTCTGGCT...TCACTGCA... 561  
CTGTGTT...TCTCCTTCTCTGTGTTTCTGCTGGCTGGAGACTCTGCTTGGG...TCTGCTTGGGTGCTCTCTGGGCTCCAGGGCTTTCTTTGTTGG 564

Mus Rattus Cavia Homo  
ACACAGTGGG...ATAGTAAAAAGCCAGTCTGGGAGCTGCCATCCC.....TAAACAGCCTTTCTTCCCCAGAG 508  
ACACAGCAGAGGTAGTAAATGCAAGCCTGTGAGCTAGCCATCCC.....TACGCTTCCCCTTCCCCAGAG 504  
TAGAGATAGATAAGATAAG...GCCATAGACTGTTCTTTTATACCCCTTTTTTAAAAAATTTTTTTTTTTTATTAGTACTTGTAGCAGGATATAATGACT 684  
ATGGAATGGAGATGACAGTAAACCTCAGCCTGTGAGCGGGCCCC.....TCACTGGTCTGCTTACCCACAG 434

Mus Rattus Cavia Homo  
.....TAAACAGCCTTTCTTCCCCAGAG 508  
.....TACGCTTCCCCTTCCCCAGAG 504  
.....TCACTGGTCTGCTTACCCACAG 727  
.....TCACTGGTCTGCTTACCCACAG 434

ENSMUSG00000029512 intron 11

Description: Serine/threonine-protein kinase ULK1 (Ulk1)  
 Intron number: 11  
 Mouse chromosome: 5  
 Upstream exon length: 51  
 Downstream exon length: 89  
 Mouse intron length: 289  
 Intron alignment length: 460  
 Total murinae branch length: 0.18766  
 K\_score: 0.08762  
 Scaling factor: 0.48092

ENSMUSG00000029512 exon 11 (ORF 2)

|        |                                          |               |    |
|--------|------------------------------------------|---------------|----|
| Mus    | ATGAATTTTTTCCACCACCCCTTTCTTGGATGCCAGCACC | CCATCAAAGAAAT | 51 |
| Rattus | ATGAATTTTTTCCACCACCCCTTTCTTGGATGCCAGCACC | CCATCAAAGAAAT | 51 |
| Cavia  | ATGAATTTTTTCCACCACCCCTTTCTTGGATGCCAGCACC | CCATCAAAGAAAT | 51 |
| Homo   | ATGAATTTTTTCCACCACCCCTTTCTTGGATGCCAGCACC | CCATCAAAGAAAT | 51 |

ENSMUSG00000029512 exon 12 (ORF 2)

|        |                                                                                  |    |
|--------|----------------------------------------------------------------------------------|----|
| Mus    | CCCCACCTGTGCCTGTGCCCTCATATCCAAGCTCAGGGTCTGGCAGCAGCTCCAGCAGCAGCTCTGCCTCCCACCTGGC  | 80 |
| Rattus | CCCCACCTGTGCCTGTGCCCTCATATCCAAGCTCAGGGTCTGGCAGCAGCTCCAGCAGCAGCTCTGCCTCCCACCTGGCA | 80 |
| Cavia  | CCCCACCTGTGCCTGTGCCCTCATATCCAAGCTCAGGGTCTGGCAGCAGCTCCAGCAGCAGCTCTGCCTCCCACCTGGCG | 80 |
| Homo   | CCCCACCTGTGCCTGTGCCCTCATATCCAAGCTCAGGGTCTGGCAGCAGCTCCAGCAGCAGCTCTGCCTCCCACCTGGCG | 80 |

  

|        |           |    |
|--------|-----------|----|
| Mus    | TCTCCACCG | 89 |
| Rattus | TCTCCACCG | 89 |
| Cavia  | TCTCCACCG | 89 |
| Homo   | TCTCCACCG | 89 |

ENSMUSG00000029512\_intron\_11

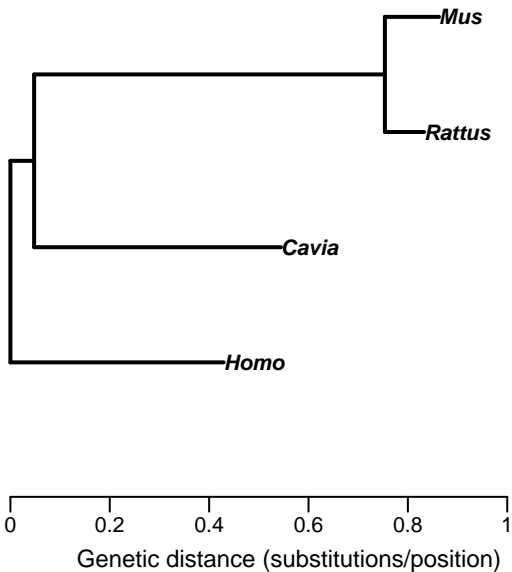





ENSMUSG00000014158 intron 8

Description: Transient receptor potential cation channel subfamily V memb (Trpv4)  
 Intron number: 8  
 Mouse chromosome: 5  
 Upstream exon length: 93  
 Downstream exon length: 74  
 Mouse intron length: 398  
 Intron alignment length: 433  
 Total murinae branch length: 0.27211  
 K\_score: 0.08782  
 Scaling factor: 0.51597

ENSMUSG00000014158 exon 8 (ORF 0)

|        |                                                                                   |    |
|--------|-----------------------------------------------------------------------------------|----|
| Mus    | CCACCCTACCCTTACCCTGACCAAGTGGACTACCTGAGGCTGGCTGGCGAGGTCATCACGCTCTTCACAGGAGTCCCTGTT | 80 |
| Rattus | CCACCCTACCCTTACCCTTACCAAGTGGACTACCTGAGGCTGGCTGGCGAGGTCATCACGCTCTTCACAGGAGTCCCTGTT | 80 |
| Cavia  | CCACCCTACCCTTACCCTGACCAAGTGGACTACCTGAGGCTGGCTGGCGAGGTCATCACGCTCTTCACAGGAGTCCCTGTT | 80 |
| Homo   | CCACCCTACCCTTACCCTGACCAAGTGGACTACCTGAGGCTGGCTGGCGAGGTCATCACGCTCTTCACAGGAGTCCCTGTT | 80 |

  

|        |                |    |
|--------|----------------|----|
| Mus    | GTTCTTTACCAAGT | 93 |
| Rattus | GTTCTTTACCAAGT | 93 |
| Cavia  | GTTCTTTACCAAGT | 93 |
| Homo   | GTTCTTTACCAAGT | 93 |

ENSMUSG00000014158 exon 9 (ORF 0)

|        |                                                                        |    |
|--------|------------------------------------------------------------------------|----|
| Mus    | ATCAAAGACTTGTTCAAGAAATGCCCTGGAGTGAATTCTCTCTTCTCGATGGCTCCTTCCAGTTACTCTA | 74 |
| Rattus | ATCAAAGACTTGTTCAAGAAATGCCCTGGAGTGAATTCTCTCTTCTCGATGGCTCCTTCCAGTTACTCTA | 74 |
| Cavia  | ATCAAAGACTTGTTCAAGAAATGCCCTGGAGTGAATTCTCTCTTCTCGATGGCTCCTTCCAGTTACTCTA | 74 |
| Homo   | ATCAAAGACTTGTTCAAGAAATGCCCTGGAGTGAATTCTCTCTTCTCGATGGCTCCTTCCAGTTACTCTA | 74 |

ENSMUSG00000014158\_intron\_8

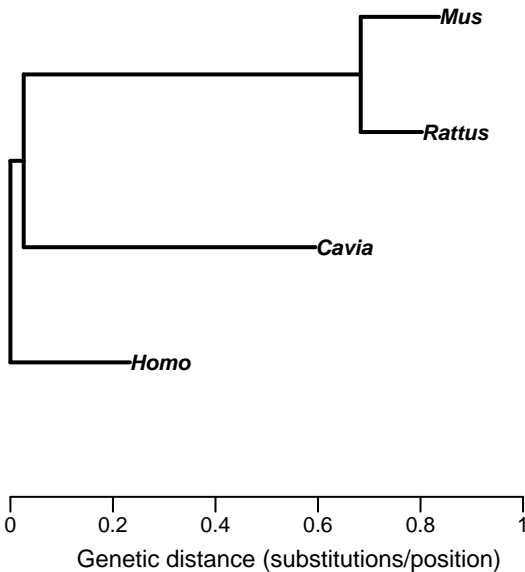



ENSMUSG00000037820 intron 12

Description: Protein-glutamine gamma-glutamyltransferase 2 (Tgm2)

Intron number: 12

Mouse chromosome: 2

Upstream exon length: 137

Downstream exon length: 151

Mouse intron length: 895

Intron alignment length: 734

Total murinae branch length: 0.15886

K\_score: 0.08338

Scaling factor: 0.52074

ENSMUSG00000037820 exon 12 (ORF 0)

|        |           |    |      |          |    |         |             |         |        |       |          |        |         |    |    |
|--------|-----------|----|------|----------|----|---------|-------------|---------|--------|-------|----------|--------|---------|----|----|
| Mus    | GTCCTGGCA | GA | AA   | CCCAAGCA | AA | ACCGCAA | AACTGGTGGCT | GAGGTGT | CCCTGA | AAGAA | CCCACTTT | CGATCC | CCTGTAT | GA | 80 |
| Rattus | ATCCTGGG  | GA | AGCC | CAAGCA   | GA | ACCGCAA | AACTGGTGGCT | GAGGTGT | CCCTGA | AAGAA | CCCACTTT | CGATCC | CCTGTAT | GA | 80 |
| Cavia  | GTCTTGGG  | GA | AGCC | CAAGCA   | GA | ACCGCAA | AACTGGTGGCT | GAGGTGT | CCCTGA | AAGAA | CCCACTTT | CGATCC | CCTGTAT | GA | 80 |
| Homo   | ATCCTTGG  | GA | AGCC | CAAGCA   | GA | ACCGCAA | AACTGGTGGCT | GAGGTGT | CCCTGA | AAGAA | CCCACTTT | CGATCC | CCTGTAT | GA | 80 |

  

|        |           |        |          |          |        |         |         |       |     |
|--------|-----------|--------|----------|----------|--------|---------|---------|-------|-----|
| Mus    | CTGCATCTT | CACTGT | GGAGGGGG | GCTGGCCT | GACCAA | GAGCAGA | AGTCTGT | GGAGG | 137 |
| Rattus | CTGTGTCTT | CACTGT | GGAGGGGG | GCTGGCCT | GACCAA | GAGCAGA | AGTCTGT | GGAGG | 137 |
| Cavia  | TTGTATCTT | CACTGT | GGAGGGGG | GCTGGCCT | GACCAA | GAGCAGA | AGTCTGT | GGAGG | 137 |
| Homo   | CTGCATCTT | CACTGT | GGAGGGGG | GCTGGCCT | GACCAA | GAGCAGA | AGTCTGT | GGAGG | 137 |

ENSMUSG00000037820 exon 13 (ORF 1)

|        |           |     |      |      |       |       |      |        |        |       |       |        |       |       |      |    |    |
|--------|-----------|-----|------|------|-------|-------|------|--------|--------|-------|-------|--------|-------|-------|------|----|----|
| Mus    | CTCAGACCC | G   | GTGC | AGGG | CGATT | TGTCA | AGGC | ACGGGT | CGACCT | GTTCC | CGACT | GATATT | GGCCT | CCACA | AGCT | GG | 80 |
| Rattus | CTCAGACCC | T   | GTGC | AGGG | CGATT | TGTCA | AGGC | ACGGGT | CGACCT | GTTCC | CGACT | GATATT | GGCCT | CCACA | AGCT | GG | 80 |
| Cavia  | CTCAGACCC | CGT | GTGC | AGGG | CGATT | TGTCA | AGGC | ACGGGT | CGACCT | GTTCC | CGACT | GATATT | GGCCT | CCACA | AGCT | GG | 80 |
| Homo   | CTCAGACCC | CGT | GTGC | AGGG | CGATT | TGTCA | AGGC | ACGGGT | CGACCT | GTTCC | CGACT | GATATT | GGCCT | CCACA | AGCT | GG | 80 |

  

|        |        |        |       |      |      |       |      |     |      |      |      |      |     |      |       |    |     |
|--------|--------|--------|-------|------|------|-------|------|-----|------|------|------|------|-----|------|-------|----|-----|
| Mus    | TGGTGA | ACTTCC | AGTGT | GACA | AGCT | GAAGT | CGGT | GAA | GGTT | ACCG | GAAT | GTAT | CAT | CGCC | CGCCT | AA | 151 |
| Rattus | TGGTGA | ACTTCC | AGTGT | GACA | AGCT | GAAGT | CGGT | GAA | GGTT | ACCG | GAAT | GTAT | CAT | CGCC | CGCCT | AA | 151 |
| Cavia  | TGGTGA | ACTTCC | AGTGT | GACA | AGCT | GAAGT | CGGT | GAA | GGTT | ACCG | GAAT | GTAT | CAT | CGCC | CGCCT | AA | 151 |
| Homo   | TGGTGA | ACTTCC | AGTGT | GACA | AGCT | GAAGT | CGGT | GAA | GGTT | ACCG | GAAT | GTAT | CAT | CGCC | CGCCT | AA | 151 |

ENSMUSG00000037820\_intron\_12

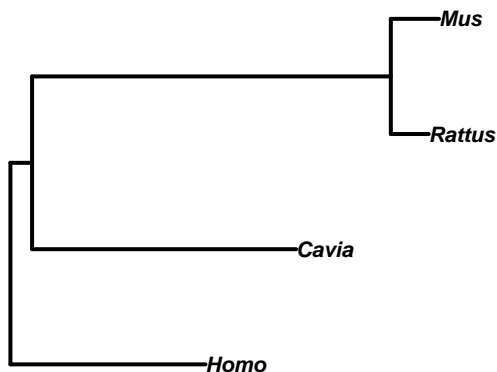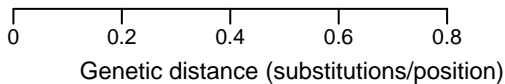

Mus 94  
Rattus 86  
Cavia 105  
Homo 110

Mus 178  
Rattus 170  
Cavia 209  
Homo 216

Mus 269  
Rattus 266  
Cavia 267  
Homo 313

Mus 339  
Rattus 318  
Cavia 371  
Homo 384

Mus 365  
Rattus 344  
Cavia 481  
Homo 410

Mus 441  
Rattus 429  
Cavia 579  
Homo 421

Mus 528  
Rattus 504  
Cavia 688  
Homo 442

Mus 638  
Rattus 568  
Cavia 745  
Homo 499

Mus 700  
Rattus 644  
Cavia 825  
Homo 545

Mus 718  
Rattus 662  
Cavia 935  
Homo 556

Mus 790  
Rattus 737  
Cavia 1044  
Homo 635

Mus 895  
Rattus 842  
Cavia 1132  
Homo 723

Sequence alignment showing DNA base pairs (A, C, G, T) for Mus, Rattus, Cavia, and Homo across various genomic regions. The alignment is presented in a grid format with species names on the left and coordinates on the right.

ENSMUSG00000013921 intron 4

Description: CLIP-170-related protein (Clip3)

Intron number: 4

Mouse chromosome: 7

Upstream exon length: 162

Downstream exon length: 119

Mouse intron length: 403

Intron alignment length: 527

Total murinae branch length: 0.18591

K\_score: 0.07984

Scaling factor: 0.52602

ENSMUSG00000013921 exon 4 (ORF 2)

|        |                                                                                   |    |
|--------|-----------------------------------------------------------------------------------|----|
| Mus    | GACCCTGCGGGCCGCTGTGCGTCTCTCACAGCAGCTGCTGGCGTAGGGCCAGATGTGACCCCTGCCAGCCGCTGGACCCAA | 80 |
| Rattus | GACCCTGCGGGCCGCTGTGCGTCTCTCACAGCAGCTGCTGGCGTAGGGCCAGATGTGACCCCTGCCAGCCGCTGGACCCAA | 80 |
| Cavia  | GACCCTGCGGGCCGCTGTGCGTCTCTCACAGCAGCTGCTGGCGTAGGGCCAGATGTGACCCCTGCCAGCCGCTGGACCCAA | 80 |
| Homo   | GACCCTGCGGGCCGCTGTGCGTCTCTCACAGCAGCTGCTGGCGTAGGGCCAGATGTGACCCCTGCCAGCCGCTGGACCCAA | 80 |

  

|        |                                                                                  |     |
|--------|----------------------------------------------------------------------------------|-----|
| Mus    | CATGAACGCCCTTCACTATGCGGCCTATTTTGTGATGTGCCAGACCTTGTTCGGTGTGCTGCTGAAGGGGGCGAGGCCCA | 160 |
| Rattus | CATGAACGCCCTTCACTATGCGGCCTATTTTGTGATGTGCCAGACCTTGTTCGGTGTGCTGCTGAAGGGGGCGAGGCCCA | 160 |
| Cavia  | CATGAACGCCCTTCACTATGCGGCCTATTTTGTGATGTGCCAGACCTTGTTCGGTGTGCTGCTGAAGGGGGCGAGGCCCA | 160 |
| Homo   | CATGAACGCCCTTCACTATGCGGCCTATTTTGTGATGTGCCAGACCTTGTTCGGTGTGCTGCTGAAGGGGGCGAGGCCCA | 160 |

ENSMUSG00000013921 exon 5 (ORF 2)

|        |                                                                               |    |
|--------|-------------------------------------------------------------------------------|----|
| Mus    | TGGTGAACCTCCACCTGCAAGTACTTCAACCATGGCTGAGCTCTGCACATCGCTGCCTGAAATCTGTGCCTGGGGCC | 80 |
| Rattus | TGGTGAACCTCCACCTGCAAGTACTTCAACCATGGCTGAGCTCTGCACATCGCTGCCTGAAATCTGTGCCTGGGGCC | 80 |
| Cavia  | TGGTGAACCTCCACCTGCAAGTACTTCAACCATGGCTGAGCTCTGCACATCGCTGCCTGAAATCTGTGCCTGGGGCC | 80 |
| Homo   | TGGTGAACCTCCACCTGCAAGTACTTCAACCATGGCTGAGCTCTGCACATCGCTGCCTGAAATCTGTGCCTGGGGCC | 80 |

  

|        |                                         |     |
|--------|-----------------------------------------|-----|
| Mus    | AAATGTTTACTGGAGCATGGTGCCAACCCAGCACTGAGG | 119 |
| Rattus | AAATGTTTACTGGAGCATGGTGCCAACCCAGCACTGAGG | 119 |
| Cavia  | AAATGTTTACTGGAGCATGGTGCCAACCCAGCACTGAGG | 119 |
| Homo   | AAATGTTTACTGGAGCATGGTGCCAACCCAGCACTGAGG | 119 |

ENSMUSG00000013921\_intron\_4

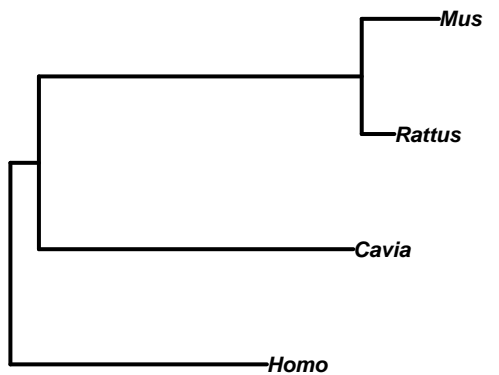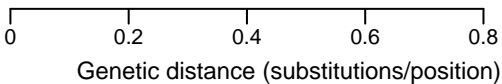

Mus  
Rattus  
Cavia  
Homo  
GTGAGGAGGCGGAGTCTCTCTGGAAAGGGGCTGGCTTAGATGAAGGGTGGACTTTC-----TTA60  
GTGAGGAGGCGGAGCCTTGGTGGATGGGGAGGGGCTGGATGAGGGGTGGACTTTC-----TTT69  
GTGAGGAGGAGTACTTCTCTGATGCAAGGGAGGACTTAGGGGAAGGGTGGGCACTGGGGTGGGGGCACGACCCAGGGCCTGTCTGAGCGAGATGGTGACAGACGCCA109  
GTGAGGAGGAGAGCCCTGGCTGGAGGGGGCAAGGAGCTGGCTGAGGGACCCGAGC-----CCA61

Mus  
Rattus  
Cavia  
Homo  
TAGGGAAGGGTACCCAGGGTTTTGAGAGGCTGGGGCCACCATCCATCTGGTTAAAGGGGAAAAA-----CTCAAGATGAAA140  
-----CGAGGAGGGGGAGGCTTTTGGACATCTGGGGCGACCATCCATCTGGTTAAAGGGGAAAAA-----CCACAGGAAA137  
GGTGGCAAGGGAGGCTAGTGGCTGGGGCGGGGGGGGGGGGGCGACGACTGGGGGGGACTCTAGGCGAGGTTTTGGGAGGGAACCCCTTCTAGAGGCGGG219  
GGTGAAGCCAGGCTGCGAGGGGAAGGAGAGGCTGATCTGAGGAGATAGCGGAGGTTGGAGC-----CTTGGAGGAGGG736

Mus  
Rattus  
Cavia  
Homo  
GGATAAAAGACTAGCCCTAAGGTTGAAGGGTCCAGGATTCAAAAGGAAACAAGGGATAGATAGACAT--GCACGGCTGGGATGCAGGTTCTGTTGGTTGTTG248  
GGATAAAAGACTAGCCCTAAGTTGAAGGGTCCAGGATTCAAAAGGAAACAAGGGCTAGAGGGCATGCCATGCCAGAGGCTAGGGCGGCTGTTGGCC-----241  
AGAGACTATGCTAACACCCCTGGCATCTGTGGGAGAGACTCACAAAGTGGGGCCAGCCT-----279  
GGCTCAGGACTACACTCTAGC-----GAGGCTCGGGCTGCCAAGGGAAGGGGGCT-----191

Mus  
Rattus  
Cavia  
Homo  
GTGGGGGTAAGTGGTGTGGGGTCATAT-----ATGTGACAGAAGGGTAGGTTGGGCAAGATGTTTAGAGACTGGGAGCCCTGAGCAG-----332  
-----AGGATATGATGATGGCTTATATACAGGATGGACAACAATGGATAGAAGGGCAGGTTGGGAAGATGCTTAGAGCCAGGAAACCGCC-----A-----331  
-----GGCAATTTAATGATTTAGCCAGAC-----TAGAATAAAAA-----GGGGGGATTAATCACTGGGAGGGCTGGGGAGGTTTCTGGTACC367  
-----CGAGGCGGGGGGGGGCTCTCCGTGGAGGCTTGGGAGCT-----233

Mus  
Rattus  
Cavia  
Homo  
GCAAGGGTGAAGCTCCATCCAGATGTGCCAT-----CACTCACTCTTACCG--TTCCCTCAGGTGCCACTTCCAG403  
GCAAGGGTGAAGCTCCATCCAGATGTGCCAGG-----CACTCACTCTTACCG--TTCCCTCAGATGCCACTTCCAG406  
GCAAGGGGAAAT-----GTAAGAGAGCTGTATTATTCCACTTGCTCACCTAGAACTGTGTCTTACCCTTCCAG443  
GCAAGCTTAGAGATTGAGCCCGAGAGGTGGAGAGGGCTGGGGCTCCACAGGGGCTCACCGGAAACCCCTCTCTTGGCCACTTCCAG320

ENSMUSG00000032413 intron 11

Description: Ras GTPase-activating protein 2 (Rasa2)

Intron number: 11

Mouse chromosome: 9

Upstream exon length: 149

Downstream exon length: 115

Mouse intron length: 860

Intron alignment length: 1224

Total murinae branch length: 0.26616

K\_score: 0.06252

Scaling factor: 0.53066

ENSMUSG00000032413 exon 11 (ORF 0)

|        |                                                                                     |    |
|--------|-------------------------------------------------------------------------------------|----|
| Mus    | CCAGTATCCGCCCTCAGCTGCTTATATTTTTGGGTGAAATATGTCAAGATCAAAAAGGATGCTGTTTTGCCCTTGTACGAACT | 30 |
| Rattus | CCAGTATCCGCCCTCAGCTGCTTATATTTTTGGGTGAAATATGTGAGATCCAGAAAGGATGCTGTTTTGCCCTTGTACGAACT | 30 |
| Cavia  | CCATATCTGCCCTCAGCTGCTTACATTTTTGAGTGAATATGTGAGATAAAAATGATGCTGTTTTGCCCTTGTACGAACT     | 30 |
| Homo   | CCATATCTGCCCTCAGCTGCTTACATTTTTGAGTGAATATGTGAGATAAAAATGATGCTGTTTTGCCCTTGTACGAACT     | 30 |

  

|        |                                                                         |     |
|--------|-------------------------------------------------------------------------|-----|
| Mus    | GTTGCTGCATCACAAATAAACTTGTCCCTTTTATCACTGCGGTGGCCGAGCTGGACTTGAAGGATACTCC  | 149 |
| Rattus | GTTGCTGCATCACAAATAAGCTTGTCCCTTTTATCACTGCGGTGGCTGACCTGGACTTGAAGGATACTCA  | 149 |
| Cavia  | GTTGCTGCATCACAAATAAACTTGTCCCTTTTATCACTGCAAGTGGCTGAATTAGACTTGAAGGATACTCA | 149 |
| Homo   | GCTGCTGCATCATGATAAACTTGTCCCTTTTGCACACTGCTGTGGCTGAATTAGACTTGAAGGATACTCA  | 149 |

ENSMUSG00000032413 exon 12 (ORF 1)

|        |                                                                                  |    |
|--------|----------------------------------------------------------------------------------|----|
| Mus    | AGATGCCAACGCCAATATTTAGAGGAAACTCCCTGGCTACCCAATGTCTGACTGAGATGATGAAATAGTGGGAGGGCACT | 30 |
| Rattus | AGATGCCAACGCCAATATTTAGAGGAAACTCCCTGGCTACCCAATGTCTGACTGAGATGATGAAATAGTGGGAGGGCACT | 30 |
| Cavia  | AGATGCCAACCAAAATTTTAGAGGAAATTCCTGGCTACCCGATGTCTGACTGAGATGATGAAAATAGTGGGAGGGCACT  | 30 |
| Homo   | AGATGCCAACCAAAATTTTAGAGGAAATTCCTGGCTACCCGATGTCTGACTGAGATGATGAAAATAGTGGGAGGGCACT  | 30 |

  

|        |                                        |     |
|--------|----------------------------------------|-----|
| Mus    | ACCTGAAAGTCAAGCTGAAAGCCCGTTCTAGATGAG   | 115 |
| Rattus | ACCTGAAAGTCAACATTGAAAGCCCTGTTCTAGATGAG | 115 |
| Cavia  | ACCTGAAAGTAAACATTAATAATCTATTCTAGATGAG  | 115 |
| Homo   | ACCTGAAAGTAAACATTAATAACCTATTCTTAGATGAG | 115 |

ENSMUSG00000032413\_intron\_11

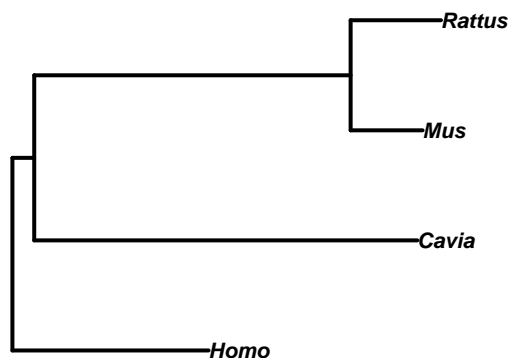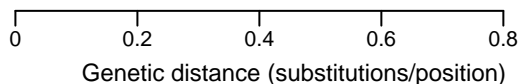





ENSMUSG00000021171 intron 20

Description: Extended synaptotagmin-2 (Esyt2)

Intron number: 20

Mouse chromosome: 12

Upstream exon length: 106

Downstream exon length: 50

Mouse intron length: 1170

Intron alignment length: 1641

Total murinae branch length: 0.21862

K\_score: 0.05612

Scaling factor: 0.53278

ENSMUSG00000021171 exon 20 (ORF 1)

|        |                                                                                   |    |
|--------|-----------------------------------------------------------------------------------|----|
| Mus    | CTTCGACTTTCAGTGTTCGCTGCCTGAGGTGCAAAAGGAGAACATTTGGATGTGGCTGTGAAGAACAGTGGTGGCTTCTGT | 30 |
| Rattus | CTTCGACTTTCAGTGTTCGCTGCCTGAGGTGCAAGGAGAACACTGGATGTGGCTGTGAAGAACAGTGGC             | 30 |
| Cavia  | CTTTGATTTCAAGCTATCACTCCCTGAGGTGCAAGGAGAACGCTGGATGTGGCTGTGAAGAACAGTGGC             | 30 |
| Homo   | CTTTGATTTCAAGTGTTCGCTTACCAAGAAAGTGCAGAGGAGAACGCTCGACGTTGGCTGTGAAGAACAGTGGC        | 30 |

  

|        |                            |     |
|--------|----------------------------|-----|
| Mus    | CCAAAGATAAAGGGCTTCTTGGCAAA | 106 |
| Rattus | CCAAAGATAAAGGGCTTCTTGGCAAA | 106 |
| Cavia  | CCAAAGATAAAGGGCTTCTTGGCAAA | 106 |
| Homo   | CCAAAGATAAAGGGCTTCTTGGCAAA | 106 |

ENSMUSG00000021171 exon 21 (ORF 0)

|        |                                                      |    |
|--------|------------------------------------------------------|----|
| Mus    | GTGCTGGTTGTTCTGGCATCTGAAGAACTCGCCAAAGGCTGGACCCAGTG   | 50 |
| Rattus | GTGCTGGTTGCTCTGGCATCTGAAGAACTCGCCAAAGGCTGGACCCAGTG   | 50 |
| Cavia  | GTGCTGGTTGGCTCTGGCATCTGAAGAAGCTCGCCAAAGGCTGGACCCAGTG | 50 |
| Homo   | GTAATGGTTGCTCTGGCATCTGAAGAACTTGCCAAAGGCTGGACCCAGTG   | 50 |

ENSMUSG00000021171\_intron\_20

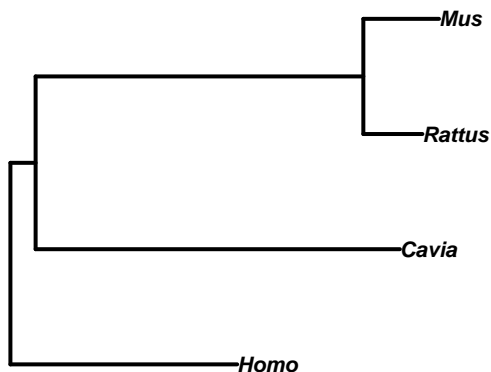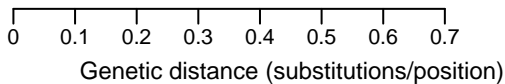

Mus Rattus Cavia Homo  
G T G A T T T T T T T A A G T C . . . . . C T T G T A T C C T A C A C A T T G T A G A A T T A A S T G C . . . . . A C T T T A G A T C A T A G C T T A C A T A G T G G A A G G G A G G C T 86  
G T G A T T G T T T T T A A G T C . . . . . C T T G T A T C C T A C A C A T T G T A G A A T T A A S T G C . . . . . A G T T T A G A T C A T A G C T T T A C A C A G T G G A A G G G A G G C T 85  
G T A A G C A T C A A G A A A T C T C A C A C C T T A C C A C C T T G T A G A A T T A A S T G C . . . . . A G C T G G A A G G T G C C 67  
G T A A G T G C C A A C G A T G . . . . . C T G A C C A G T T G C C A G T T T T G A A A T T G A A C A T T T A C T T G C A G T G C A G T G T T T A G A C C A T G T C T G T G T A A G T G A A G G G C G A C 105

Mus Rattus Cavia Homo  
C A C T C T A A T T A A T T G T G C T T A T C A C A T T G T G G T . . . . . A A G A C A T C A G T A C A T A G C T . . . . . G T T T T C C T G A T 151  
C A C T T G G T T A G T C A T G T T T A T C A C A T T G T G G T . . . . . A A G A C A T C A G T A T A G C T . . . . . G T T T C C T G A T 149  
T T A C T C T G G T T A G G C C T G T T A G T A A C A T A A T G T G . . . . . C A A G A C T T G G T G T T C A C T C T G A G A T A T T T A A G T T G C T C T G T T C A T T T T A T G A T 164  
T T A C C A G G T C G A T G C T T G T T A T A A A T C A T G G G T A T A A A G A C A G T C A A A C A T T G T G C T T . . . . . T C T G A G A T A T T T A A G T T A A G T C T C A C A T T T T T G T A 207

Mus Rattus Cavia Homo  
T C T A C T A T T G G C T A T T A C T C A T A C A A A C A T C A G G A A C T T A G A G G T G A A G A A A G C T T G A T T A A A C T T . . . . . G T T G T A A A A C T G T T C A A T A T T A C A T G G 248  
G C T T A C T A T T G C T T A T T A C T C A T C G T A A A C A A A G C A A C T T A A G G T G A A G A A A C A T T G A T T C C T T T T T T T T T T T T G A A A T T T T A G A A A C T T C A A T A T T A C A T T G G 258  
T C A T A T T T T G G C T T A T T A T T C T A T T C T A G A T C T A G G A A C C T T G A G T T G A A A A A G A T T G A T T T C A G C T T T T A C A T T . . . . . T C A T T C A A T A T T A C A T T G C 262  
T C A T T C G T A G T G T G . . . . . A G T A T C A C A T T . . . . . 218

Mus Rattus Cavia Homo  
A A G A A A A C T G T A A G G C A A A A T A T C T C C A A T A A C C T G C T G . . . . . C C C A C C C A C T C A G T A A T T A T G T G C T T C C T T A C C A T G C G T T G A C T T C T T G C T C C A G A T T T T C 354  
A A G A A A A C A T G A A G G A A A A T C C C T C A A A T A S C C T G C T G C C C C C C C C C C A T C A G C T A A G C A T G T A C T T G C T T C A G C A T T G C A T T G A C T T T C T T C C G T A A T T T T C 367  
A A A A A C A C . . . . . A A G G A A A A A G S T T C A G A A C C C A T T C C C C C C T . . . . . C A T G C C C A C T E A G G C T C G C T T T T C A A A A T T C T T G G C T T A T T A T G T G A T T T C T 308

Mus Rattus Cavia Homo  
T T T T G T T T T T T C C A T . C T C A C A T T A A T T T T A T G T A G G T T T A G T A T T A T T T A C A G T G T A A A G A G G T T T A A T A T G G A A A G C G C . . . . . T T T G A G T T G T A G T G C . . . . . 458  
T T T T G T T T T T T C C A T . C T C A C A T T A A T T T T G T G A G T T T A T A T T A T T T A C A G T G T A A A G A G G T T T A B A T A G G G A A A G . . . . . G A A T T G A G A T G . . . . . 462  
T G C C T C T G T C C A T . G T T C A C C A G A C C T T T C A G A A A G A T T C T G C T T C C T T A G C A T C A G A T C C C A G C C A G G A A G A G T G C T C A C A G A G C C C T G C G 446  
T C T A C C T T T G C C G A T T T C A C A T T T C A T T T G C A T G T G A G T C T A T T A T T A G A A T C A G A T C A G T . . . . . T C A G T T T G G G A G A A G A T T T G A G T C A C G G C A T . . . . . 414

Mus Rattus Cavia Homo  
C A C T T T G T C A A C A G C A A A G T G A A A A A T C T G T A T C A G T A G C C A T G A C A A A T A C T A A G A G A C A A A T G T A A A C A A G A G A G T T A A T T T A C C T . . . . . C T T G A T T C A G A 567  
T T T T G T T T T T T C C A T . C T C A C A T T A A T T T T G T G A G T T T A T A T T A T T T A C A G T G T A A A G A G G T T T A B A T A G G G A A A G . . . . . G A A T T G A G A T G . . . . . 572  
T G C C T C T G T C C A T . G T T C A C C A G A C C T T T C A G A A A G A T T C C A T G C A T C A G C A G G C C A T G T A A A C A A G A G A G T T T T T T T T T T C C C T C C T T C A G A 462  
C A T T T G T A G T G T G . . . . . 430

Mus Rattus Cavia Homo  
A G T T T C A T G A A T G G G C C T T G C T C T A T T A T T T T G T G G C C A G T T G T A A G G C A A A G G T T A G G T G G G G A G C A T G A G C A G A A C T A G A G C T G C C A C C A C A A T G C C A G 677  
A G T T T C A T G A A T G G G C C T T G C C T A T C A G C A G G C C A T G G A A A A C T . . . . . T T T T C T G G G C A G T T G T A A G G C A A A G G T T A G G T G G G G C C A T G A G A C A G A A T A G A G C T G C A C A C A A A T A G A A G 674  
T G C C T C T G T C C A T . G T T C A C C A G A C C T T T C A G A A A G A T T C C C A T G C A T C A G C A G G C C A T G G A A A A C T . . . . . 462  
C A T T T G T A G T G T G . . . . . 430

Mus Rattus Cavia Homo  
A G A G C A G A G A T A T G C A G A G A G A C C A A G A G A A A G T A T A G C T T C C A G A G C A T C C C T A G I A G C C C C T A C C C A C C C A C A A T T T C C C A T C A C C G C A C A . . . . . G T A T G A T 782  
A A G C A C A A G A T A T G C A G A G A G A C C A A G A G A A A G C A C A G C T T C C A G A G T G C A T T G C T A G T G A . . . . . C C C T A C C C C C A C A T T T C C C A C T G C C A C A T A G T A T G T A G A T 782  
T G C C T C T G T C C A T . G T T C A C C A G A C C T T T C A G A A A G A T T C C C A T G C A T C A G C A G G C C A T G G A A A A C T . . . . . 462  
C A T T T G T A G T G T G . . . . . 430

Mus Rattus Cavia Homo  
C T A C C T C A T A A T A A C T C A T T G A T A G G T C A A C C C T C T G G T T C T G T T G C C T G C A A A G C C C T C A G T T A G T T G G C A A C C A A G C T T T A A A C A T A G A C C T T T T A T A G T 892  
C T G C C A G A G A C T A A C C A T T G C C A G T A C T G A G A C C C T T T G G G T T A G T C C C T T G A A A G C C C A C A G T T G C T T G G C A A C C A A G G T T T A A A A C A C A G A C C T T T T A T A G T 891  
T G C C T C T G T C C A T . G T T C A C C A A A G T G A A A A C C T G T A T C A G C A G G C C A T G G A A A A C T . . . . . C T G C C A T G G A G G G A C A T G G C C A . . . . . 455

Mus Rattus Cavia Homo  
C A C T T C A T A T C T A A A C C A C A C A T C C C A T T A G T A C A T A T T T G T A G T A T C T A T A G A T C T T T A T G T T T T C A T A A T A A T T A A C T A T T A G A T A C A A G A G A 1001  
C A C T T C A T A T C T A A A C C A C A C A T C C C A T T A G T A C A T A T T T G T A G T A T C T A T A G A T C C C A T A G C T G C T C T G G A T G T T T T C A C G G T C A T T G A G A C T A T T A G A T A C A G A G A 1001  
T G C C T T C A T A T C T A A A C C A C A C A T C C C A T T A G T A C A T A T T T G T A G T A T C T A T A G A T C C C A T A G C T G C T C T G G A T G T T T T C A C G G T C A T T G A G A C T A T T A G A T A C A G A G A 576  
T G C C T T C A T A T C T A A A C C A C A C A T C C C A T T A G T A C A T A T T T G T A G T A T C T A T A G A T C T T A T G T T T T C A T A A T A A T T A A C T A T T A A C T G C T G A A C A C A G G C A T G A A G 524

Mus Rattus Cavia Homo  
A T C T C T T G G A T T A C T C A G . . . . . C T A T C . . . . . T A A A G G T T A A A A T G A T T T T A A A A A T G A G A A C C T C A A A A C A T 1067  
A T C T C T T G G A T T A C T C A G . . . . . C A T G . . . . . G A A A G G T T A A A A G A T T T T T A A A A A T G A G A A C C T C A A A A C A T 1067  
A T C T C T T G G A T T A C T C A G A G A T G C T T G G T T A C C A G C A T T C C C C C C C T C T A B C A C A A A T G A A T C T A A A G G T T A A A A G A T T T A A A G A C T G A T G C A A G A A A A 683  
A T T C T T A G A T C A T T C A G . . . . . C G A T G A G T T A C A G G T G C T A G G G G G T A G A A A G A T T G A A A A A G T A A G C C T C A G A A A A G 607

Mus Rattus Cavia Homo  
G A G A T T T C A T A T T G T T A . . . . . A G A A A T T A G A G A G T A G G A A G G A G T . . . . . G A T C A T G A T A A A C G A T T T . . . . . 1133  
G A G A T T T C A T A T T G T T A . . . . . A G A A A T T A G A A C G C T A G G A A G G A G T . . . . . G S T G C T G A T G T T A A A G A G T T A . . . . . 1133  
G G A A C H G C A T A T T G C T A G T . . . . . A A G A G A C A G A T T A G G C G G G A G G A G A C T A A A A A G A A G C T C . . . . . 748  
G G A G A C T C C A T A T T C C T A G A T G A A G A C A G A T T A G A G . . . . . A G A T G A G A A G A G T . . . . . G G T A A A A G A T C T A A A A G A C A T T G T C T T A G C C T A C T T T A T G T A T T G T T T A 710

Mus Rattus Cavia Homo  
T T T A T T T A G A C A G G G T C T G T A G A A G C A A G G C T G A A G T C C A G T G G C G C A T C A T G G C T C A C T G C A G C T T C A A A T G C C T G G G C T C C A G C A A T T G C T G T C T C A G C C T C C C 820

Mus Rattus Cavia Homo  
G A G T T G C T G G G A C C A A G G T G C G T G T C A G C A C G C C A G A T A A A T T T G T T T A C T T T T A A T A G A G A C A A G G T T T C A C T A T C T T G C C A G G C T G G T C T C A A A C T C T T G G G C T T 930

Mus Rattus Cavia Homo  
C C C A G A A T T T T C A C A G A C C T T C T T T A A T C C A C A G 1170  
C T C A G A G . . . . . T C C A C A G T G C C T C T T C T A C C C A G 1168  
C T C A G C C A T T G C A G T G A G C C C C T C T C T T T C C T C A G 784  
A A G A G A T C C T C C C A T C T T G G C C T C C C A A A G T G C T G G G A T T A C A G A C G G G A G C C A G T G C C C C A G C C A G C T A C T T A A C T G C T T T T T A C A A C C C A G 1031

ENSMUSG00000039263 intron 9

Description: Probable aminopeptidase NPEPL1 (Npepl1)

Intron number: 9

Mouse chromosome: 2

Upstream exon length: 124

Downstream exon length: 177

Mouse intron length: 280

Intron alignment length: 388

Total murinae branch length: 0.26144

K\_score: 0.04856

Scaling factor: 0.53744

ENSMUSG00000039263 exon 9 (ORF 1)

|        |                                                                                      |    |
|--------|--------------------------------------------------------------------------------------|----|
| Mus    | GACCGTAGAGATCAACAACACGGATGCTGAGGGCCAGGGCTGGTGGTGGCAGACGGGGGTGTCTTATGGCTTGCAAAGACCTGG | 80 |
| Rattus | GACCGTAGAGATCAACAACACGGATGCTGAGGGCCAGGGCTGGTGGTGGCAGACGGGGGTGTCTTATGGCTTGCAAAGACCTGG | 80 |
| Cavia  | GACCTGTGGAAATCAACAACACAGATGCTGAGGGCCAGGGCTGGTGGTGGCAGATGGCTGTGCTTATGCTTGAAGACCTGG    | 80 |
| Homo   | GACGGTGGAAATCAACAACACGGATGCTGAGGGCCAGGGCTGGTGGTGGCAGATGGCTGTGCTTATGCTTGAAGACCTGG     | 80 |

  

|        |                                                |     |
|--------|------------------------------------------------|-----|
| Mus    | GGGCTGACATCATCGTGGACATGGCCACCCTGACAGGGGCCACAA  | 124 |
| Rattus | GTGCTGACATCATCTGTGGACATGGCCACCCTGACAGGGGCCACAG | 124 |
| Cavia  | CGGCTGACATCATCTGTGGACATGGCCACCCTGACAGGGGCCACAG | 124 |
| Homo   | GGGCTGACATCATCTGTGGACATGGCCACCCTGACAGGGGGTTCAG | 124 |

ENSMUSG00000039263 exon 10 (ORF 0)

|        |                                                                                       |    |
|--------|---------------------------------------------------------------------------------------|----|
| Mus    | GGCATTGCCACAGGGAAATACCATGCAGCCGTGCTCACCAACAGCGCCGAGTGGGAGGCGGCCTGCGTGAAGGCTGGCC       | 80 |
| Rattus | GGCATTGCCACAGGGAAATACCATGCAGCCGTGCTCACCAACAGCGCCGAGTGGGAGGCGGCCTGCGTGAAGGCTGGCC       | 80 |
| Cavia  | GGCATTGCCACAGGGAAATACCATGCAGCCGTGCGGTGCTCACCAACAGCGCCGAGTGGGAGGCGTGCCTGTGTGAAGGCGGGCA | 80 |
| Homo   | GGCATTGCCACAGGGAAATACCATGCAGCCGTGCGGTGCTCACCAACAGCGCTTGAAGTGGGAGGCGCCTGTGTGAAGGCGGGCA | 80 |

  

|        |                                                                                   |     |
|--------|-----------------------------------------------------------------------------------|-----|
| Mus    | GAAAGTGCGGGGACCTGCTCCACCCGCTAGTCTACTGCCCTGAGCTGCACCTTCAGCGAATCACCTCGGCTGTGGCTGACA | 160 |
| Rattus | GAAAGTGCGGGGACCTGCTCCACCCGCTGGTCTACTGCCCTGAGCTGCACCTTCAGCGAATCACCTCAGCTGTGGCTGACA | 160 |
| Cavia  | GGAAGTGCGGGGACCTGCTCCACCCCTGGTCTACTGCCCTGAGCTGCACCTTCAGCGAATCACCTCAGCTGTGGCTGACA  | 160 |
| Homo   | GAAAGTGCGGGGACCTGCTCCACCCGCTGGTCTACTGCCCTGAGCTGCACCTTCAGCGAATCACCTCAGCTGTGGCGGACA | 160 |

ENSMUSG00000039263\_intron\_9

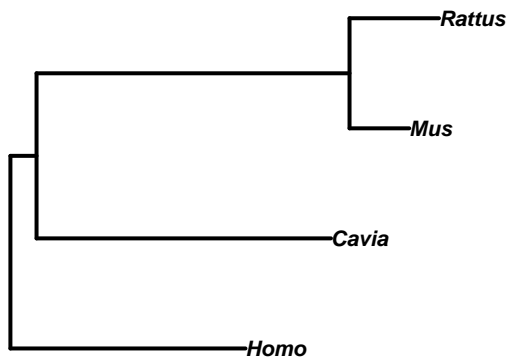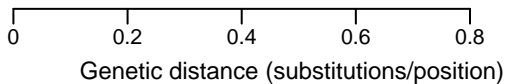

Mus GTGAGTA...CCACACTTCACCTCTGGCTGCAGCTCC...CCAGAACCTGAACCC... 51  
Rattus GTGAGTA...CCACACTTCACCGCTGGCTGCAGCTG...CCCTCCGCAAGACCC... 50  
Cavia GTAGGG...CCTGAGTTAGCTCCGGCCGAGCTCC...CTTGACTTGGCTGTGTGGTCAGCCCGGGGGC...GGATTCATTAGTTCC 96  
Homo GTGAGTCTCTCCCTGGATCGAGGCTTTAGCTCTAGTCCGAGGGAAOCCCA...CCGACGCTTGAAGCTAAAGGTGGGAAGCAGGCGCTGGGGCTGGCTCAAGAAATTTT 110

Mus -----TCGTTGGCAGGTGAACATCTGGCGCTC-----TCATTCCGGAGGAAGGTCGGTTCCCTCCTCCGCTTGGAGCCGA 123  
Rattus -----CTGTTGGCAGGTGAGGATGAGGATG-----TCATTCTGGAGGTAAGGAGGCGCTCCGCTGCTTGGAGCCGA 121  
Cavia AITAA...CTGGCAAGAGGAGGAGGAGCTGTGGTCTGGCTC-----TCGAGGAGCCCATGCTGGAGTG...CCGGAAACCGCTCCTCTGTGCTTATG 155  
Homo AITAA...CTGGCAAGAGGAGGAGGAGCTGCCGTGAAGCTTGGTGTGGCAGTACCGAGCCCATGCTGGAGTG...CCGGAAACCGCTCCTCTGTGCTTATG 218

Mus ACCCATGCCCGGCACTTGTCTGCAAGCCTGC-----TCCTTTCCGGCTCTTCCCTCTCCCTGCTGTATTTCCTGTCTGCCGAGTGTCTGCTTGGTCCAGCT 225  
Rattus ACCCATGCCCTGCCCACTTGT-----TCCTTTCCGGCTCTTCCCTCTCCCTGCTGTATTTCCTGTCTGCCGAGTGTCTGCTTGGTCCAGCT 193  
Cavia -CGTGTTCCCTTCCGTAGTTTCTTCTTTCTTGGAACTTGATGCTGACGGCTCTCGGTTGGCT-----TATTTCCTCATCGCCCATCTTCCCATTTTGTCTCCCA 257  
Homo GCGATGCTCCTTCTGCTGTGTTTCTTTT-----TCTCAAACCGTCTCTTCTGGCTGCCCTTATTTCTCTGTCTGCTCCCGTCCCTCTT-TTTGGCTTGGGTG 322

Mus TCGTTTCTCTGCTGTCTTCCCTGTACGGTTGCTTCCCTTGTGTCTTT...TGCCTAG 280  
Rattus CGGTTTCTCTGCACTTCTCTCAATGGTGGCTTCCCTTGTGTCCCT...TGCCTAG 248  
Cavia TGTGTTCTTGGCTTCCGACTGGAT...CCATGGCTTGGCTGGCCAGGCCCAAG 311  
Homo TTTTCTCTCTGCCCTCCCGAGCA...AGGCTTCCGCGCTTCTGCGCCAG 373

ENSMUSG00000003759 intron 9

Description: SH3KBP1-binding protein 1

Intron number: 9

Mouse chromosome: 7

Upstream exon length: 191

Downstream exon length: 116

Mouse intron length: 1088

Intron alignment length: 1620

Total murinae branch length: 0.14486

K\_score: 0.08771

Scaling factor: 0.53832

ENSMUSG00000003759 exon 9 (ORF 1)

|        |                       |                                                            |    |
|--------|-----------------------|------------------------------------------------------------|----|
| Mus    | TTCTCCAGCCCGCGCCCTGGA | CTGGCCATCGAGCGCCCTGGCTCTTGGGGCTCGGGTGGCTGGGGTCTCCGGGTGAGCA | 80 |
| Rattus | TTCTCCAGCCCGCGCCCTGGA | CTGGCCATCGAGCGCCCTGGCTCTTGGGGCTCGGGTGGCTGGGGTCTCCGGGTGAGCA | 80 |
| Cavia  | TTTTCAGCCCGCGCCCTGGA  | CTGGCCATCGAGCGCCCTGGCTCTTACAGCCCGGGTGGCTGGGGTCTCCGGGTGAGCA | 80 |
| Homo   | TTTTCAGCCCGCGCCCTGGA  | CTGGCCATCGAGCGCCCTGGCTCTTACAGCCCGGGTGGCTGGGGTCTCCGGGTGAGCA | 80 |

  

|        |                        |                                                           |     |
|--------|------------------------|-----------------------------------------------------------|-----|
| Mus    | TGACAAGATGGTGGCTGCAGCT | ACTGGCAGCGAGATCCTTCTGTGGGGCTACAGGCACAAGGTGGTGGCTCTGAGATAG | 160 |
| Rattus | TGACAAGATGGTGGCTGCAGCT | ACTGGCAGCGAGATCCTTCTGTGGGGCTACAGGCACAAGGTGGTGGCTCTGAGATAG | 160 |
| Cavia  | TGACAAGATGGTGGCTGCAGCT | ACTGGCAGCGAGATCCTTCTGTGGGGCTACAGGCACAAGGTGGTGGCTCTGAGATAG | 160 |
| Homo   | TGACAAGATGGTGGCTGCAGCT | ACTGGCAGCGAGATCCTTCTGTGGGGCTACAGGCACAAGGTGGTGGCTCTGAGATAG | 160 |

ENSMUSG00000003759 exon 10 (ORF 2)

|        |             |                                                                     |    |
|--------|-------------|---------------------------------------------------------------------|----|
| Mus    | GTGTCTTCCA  | CTGGGTGTGCCAGTGGAGGCCTTGTCTTTGTTGGGAATCAGCTCATTGCCACAAGTACACAGGGCGC | 80 |
| Rattus | GTGTCTTCCA  | CTGGGTGTGCCAGTGGAGGCCTTGTCTTTGTTGGGAATCAGCTCATTGCCACAAGTACACAGGGCGC | 80 |
| Cavia  | GAGTCTTCCAT | CTAGGGTGCCTGTGGAGGCTTTGTCTTCTGTTGGGAATCAGCTCATTGCCACAAGTACACAGGGCGC | 80 |
| Homo   | GAGTCTTCCAT | CTAGGGTGCCTGTGGAGGCTTTGTCTTCTGTTGGGAATCAGCTCATTGCCACAAGTACACAGGGCGC | 80 |

  

|        |                       |                  |     |
|--------|-----------------------|------------------|-----|
| Mus    | ATCGGTGTCTGGAACGCTGT  | GACCAAGCACTGGCAG | 116 |
| Rattus | ATCGGTGTCTGGAACGCTGT  | GACCAAGCACTGGCAG | 116 |
| Cavia  | ATTGGAGTGTGSAATGCTGT  | CACCAAGCACTGGCAG | 116 |
| Homo   | ATCGGGTGTGTGSAATGCTGT | CACCAAGCACTGGCAG | 116 |

ENSMUSG00000003759\_intron\_9

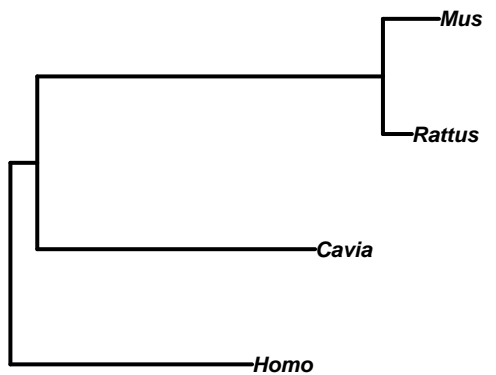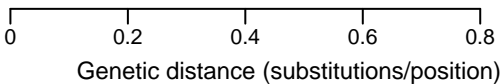



ENSMUSG00000028532 intron 15

Description: VWFA and cache domain-containing protein 1 Precursor (Cachd1)

Intron number: 15

Mouse chromosome: 4

Upstream exon length: 182

Downstream exon length: 111

Mouse intron length: 1385

Intron alignment length: 1934

Total murinae branch length: 0.19311

K\_score: 0.06399

Scaling factor: 0.54129

ENSMUSG00000028532 exon 15 (ORF 0)

|        |                                                                                     |    |
|--------|-------------------------------------------------------------------------------------|----|
| Mus    | TGGCGACCAGCCACGTCACAGATGAATGGATGACACAAAATGGAAATGAGCAGCCTGAACACCTACATTGTCCGCCGTTAC   | 80 |
| Rattus | TGGCGACCAGCCACGTCACAGATGAATGGATGACACAAAATGGAAATGAGCAGCCTGAACACCTACATTGTCCGCCGTTAC   | 80 |
| Cavia  | TGGCGACCAGCCACGTCACAGATGAATGGATGACACAAAATGGAAATGAGCAGCCTGAACACCTACATTGTCCGCCGTTAC   | 80 |
| Homo   | TGGCTTACCAAGCCACGTCACAGATGAATGGATGACACAAAATGGAAATGAGTAGCCTGAACACTTACATTGTCCGCCGTTAC | 80 |

  

|        |                                                                                |     |
|--------|--------------------------------------------------------------------------------|-----|
| Mus    | ATAGCAACACCCAAATGGCGTCCTCAGAATTTATCCTGTTCCCTTATGGACAAAGCATTGATCCCAGTGGAGACAGTG | 160 |
| Rattus | ATAGCAACACCCAAATGGCGTCCTCAGAATTTATCCTGTTCCCTTATGGACAAAGCATTGATCCCAGTGGAGACAGTG | 160 |
| Cavia  | ATAGCAACACCCAAATGGCGTCCTCAGAATTTATCCTGTTCCCTTATGGACAAAGCATTGATCCCAGTGGAGACAGTG | 160 |
| Homo   | ATAGCAACACCCAAATGGCGTCCTCAGAATTTATCCTGTTCCCTCATGGACAAAGCATTGATCCCAGTGGAGACAGT  | 160 |

ENSMUSG00000028532 exon 16 (ORF 1)

|        |                                                                                |    |
|--------|--------------------------------------------------------------------------------|----|
| Mus    | GTATCTTCATGCAGTAGCCAATCCAGGGCTGATTTCTTGACGGGCCCTTACCTGGATGTTGGAGGAGCTGGCTATGTC | 80 |
| Rattus | GTATCTTCATGCAGTAGCCAATCCAGGGCTGATTTCTTGACGGGCCCTTACCTGGATGTTGGAGGAGCTGGCTATGTC | 80 |
| Cavia  | GTATCTTCATGCAGTAGCCAATCCAGGGCTGATTTCTTGACGGGCCCTTACCTGGATGTTGGAGGAGCTGGCTATGTC | 80 |
| Homo   | GTATCTTCATGCAGTAGCTTAATCCAGGGTTGATTTCTTGACTGGTCTTACTTAGATGTTGGAGGAGCTGGTTATGTT | 80 |

  

|        |                                  |     |
|--------|----------------------------------|-----|
| Mus    | TGACAATCAGCCACACAATTCACCTCATCCAG | 111 |
| Rattus | TGACAATCAGCCACACAATTCACCTCATCCAG | 111 |
| Cavia  | TGACCATCAGCCACACAATTCACCTCATCCAG | 111 |
| Homo   | TGACAATCAGTTACACAATTCATTCATCCAG  | 111 |

ENSMUSG00000028532\_intron\_15

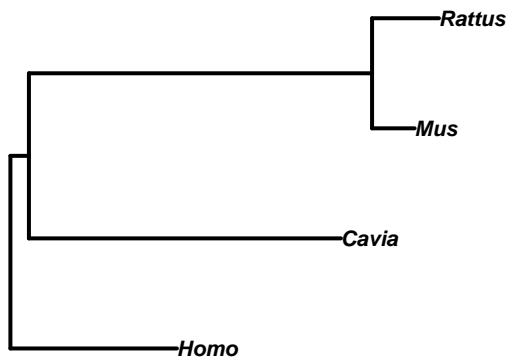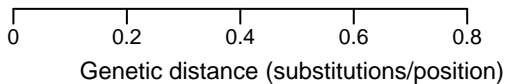





ENSMUSG00000024911 intron 9

Description: Acidic fibroblast growth factor intracellular-binding protei (Fibp)  
 Intron number: 9  
 Mouse chromosome: 19  
 Upstream exon length: 98  
 Downstream exon length: 70  
 Mouse intron length: 493  
 Intron alignment length: 626  
 Total murinae branch length: 0.30319  
 K\_score: 0.01867  
 Scaling factor: 0.54739

ENSMUSG00000024911 exon 9 (ORF 0)

|        |                                                                                      |    |
|--------|--------------------------------------------------------------------------------------|----|
| Mus    | TTTGTGGAACCCCTGCCCGCTCTGACCACTGGCCACTGAGTGATGTGGGGCTCTTCCTCAGCCAGTATTTCAGCGTCAAGTCCA | 80 |
| Rattus | TTTGTGGAACCCCTGCCCGCTCTGACCACTGGCCACTGAGTGATGTGAGGGCTCTTCCTCAATCAGTATTTCAGCGTCTGTCCA | 80 |
| Cavia  | TTTGTGGAACCCCTGCCCGCTCGACCACTGGCCACTGGCTGATGTGGGGCTCTTCCTGAATCAGTATTTCAGCACTGTCCA    | 80 |
| Homo   | TTTGTGGAACCCCTGCCCGCTCGACCACTGGCCACTCAGCGAGTGTGGGGCTCTTCCTGAATCAGTATTTCAGCGTCTGTCCA  | 80 |

  

|        |                    |    |
|--------|--------------------|----|
| Mus    | CTCCCTGGATGGCTTCCG | 98 |
| Rattus | CTCCCTGGATGGCTTCCG | 98 |
| Cavia  | CTCCCTGGATGGCTTCCG | 98 |
| Homo   | CTCCCTCGATGGCTTCCG | 98 |

ENSMUSG00000024911 exon 10 (ORF 1)

|        |                                                                        |    |
|--------|------------------------------------------------------------------------|----|
| Mus    | GCACCAGGCCACTCTGGGACCCTACATGGGCACCCTCCGTGGCTGCCTTCTGCGCCTCTATCATGATTAA | 70 |
| Rattus | GCACCAGGCCCTCTGGGACCCTACATGGGCACCCTCCGTGGCTGCCTTCTGCGCCTTATCATGATTAA   | 70 |
| Cavia  | GCACCAGGCCCTCTGGGACCCTACATGGGCACCCTCCGTGGCTGCCTCTGCGCCTCTATCATGATTAA   | 70 |
| Homo   | ACACCAGGCCCTCTGGGACCCTACATGGGCACCCTCCGTGGCTGCCTCTGCGCCTGTATCATGATTGA   | 70 |

ENSMUSG00000024911\_intron\_9

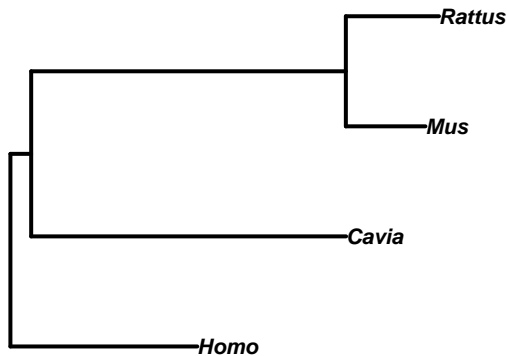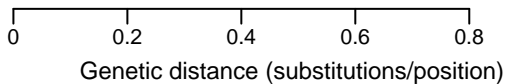

Mus GTGAGAGGTGCCAGGCCTGCTGGCTAACTT... CCGTATGCTCCATAGACTCAGGCTTCTCTGTGAAGTCCCTGTGGGTGC 81  
Rattus GTGAGAGGTGCCAGGCCTGCTGGCCAGCTT... CCGTATGCTCCATAGACTCAGGCTTCCCTGTTGAAGCACCCTGTAGGTAG 80  
Cavia GTGAGAGACTCCAGTCTCCGACCTTCTG... CCGTATGCTCCATAGACTCAGGCTTCCCTGTTGAAGCACCCTGTAGGTAG 78  
Homo GTGAGAGAGC-CGTTGCTCTCTGTGCAAGGTTGGCTTTGCCCCAGCCTGCCACCTGCCAGGACCTGGGCTGGTCCAGACTTCAGGTTCCGCAATCTGCTAACCCTGGGGTGG 109

Mus AAGCTT... CCGGCTCTCCCTTCTTGTGACCTTGGGCAAGTTTCTTAAACCTTCTCTGTGCCCTTAGCTCTCTTAAATGTAAGTGA 161  
Rattus AAGTCT... CCGGCTCTCCCTTCTTGTGACCTTGGGCAAGTTT... ACTCTGTGCCCTTAGCTCTCTTAAATGTAAGTGA 151  
Cavia AAGTTTAACTTCAAACACTTAAATGTTGTGACCTTGGGCAAGTTTACTTGAATCTCTGATGCCCTGTTTCTGATGTAAACTGG 157  
Homo GACCAAAGTCTCTGGACCAAAGCTCTGGCTCTCCCTCTTAAAGCTTGTGTGATTTGGGGCAGGTTTCTTAACTCTCATGCCCTGAGTTTCTCATGTAAACTAGGG 216

Mus CTAAAGCTAGAAGACTATAAGGTTTATGAAACT... AAAAGTCCCTCAGATCGGCTCCAGCA 224  
Rattus ATACAGCGAAGACTGCTAAGACTTATGAGACT... AAAAGTCCCTCAGATCGGCTCCAGCA 214  
Cavia GTAATAATTAAGAAATATCGTGAAGATTTATGAGGCTGGGCTGGGATTTAGCTTAGCGGCATAAGTGCCTGCCCTTGAAGGAGGAGTCTGAGTTCAATCCGGGTTAG 277  
Homo TTCAATCATGAGAAGAAATGTAAAGATTTCTAAGG... 253

Mus TGGGTGGAGAGCAGGGAGAAGGAAGCCGGGCAAAATGGCTCAAAGTTTGTATTCACAGCAATCGGAAGCTGGGACATGAGGATGGCCGTGTTTTCCAGGCCAGCTTGAG 334  
Rattus GGGGTGGAGCAGAGAGAGAAGGAGCTGGGCAATAATGGCTCAAAGTTTGTATTCACAGCAATCGGAAGCTGGGACATGAGGATGGCCGTGTTTTCCAGGCCAGCTTGAG 318  
Cavia ATTAAGAGGARAAGACCAAAAAT... AAAAACAACAATAAAAATAAAAAAATTTATGAGGGCTGATGGG 352  
Homo GCAAAAAGAAAGAAAGCTGTAAGAA... 276

Mus CCA... CAGTGTGAAAGCCCTGTCTCAAAAAAACAATTCGAAAAAATAAAAAGGAGGGGCTGTCTGAGGAAGAAAGTGTAGAAA 421  
Rattus CCA... CAGTGTGAAAGCCCTGTCTCAAAAAAACAATTCGAAAAAATAAAAAGGAGGGGCTGTCTGAGGAAGAAAGTGTAGAAA 463  
Cavia CTAGGGATGTGCAACACCTGTCTGGCTTGTGAAAGCCCTGACTTGAGCAACCAGCCACAGGGAAAAAGACCTGAGGAGGACTGACTGAGCTAATTTATAGAAA 462  
Homo CCA... CAGTGTGAAAGCCCTGTCTCAAAAAAACAATTCGAAAAAACAATTCGAAAAAATAAAAAGGAGGGGCTGTCTGAGGAAGAAAGTGTAGAAA 318

Mus ACACCTGAGCGG... TGGTGTGGCAGGCATGGCGTGAATGGACATCAGCTCTCACGGTATCTTCTTCAITGCAG 493  
Rattus GCACTCA... TGGTGTATTTGGGCATGGCAACAGTGGACATCAGCTATCACTCTTGTCTATTTGTTGCAG 433  
Cavia GCACTCAGCAGTGTCTGGCTGTAGAGCACGG... TCACTGTGCTATTTCCATTCCAG 517  
Homo AC... TCACTGTGCACTGTCTCACTCTT... CAG 348

ENSMUSG00000038387 intron 4

Description: Ras-related protein R-Ras Precursor (Rras)

Intron number: 4

Mouse chromosome: 7

Upstream exon length: 109

Downstream exon length: 119

Mouse intron length: 488

Intron alignment length: 1140

Total murinae branch length: 0.14869

K\_score: 0.07154

Scaling factor: 0.55008

ENSMUSG00000038387 exon 4 (ORF 1)

|        |                                                                                     |    |
|--------|-------------------------------------------------------------------------------------|----|
| Mus    | TTTCAATGAGGTCGGCAAAGCTCTTTCACACAGATCCTCAGAGTCAAGGACCGGGATGATTTCCCCATTGTGTGGTTGGGA   | 80 |
| Rattus | TTTCAATGAGGTAAGCAAAGCTCTTTCACACAGATCCTCAGAGTCAAGGACCGGGATGATTTCCCCATTGTGTGGTTGGGA   | 80 |
| Cavia  | CTTCAAACGAGGTGAGCAAAGCTCTTTCACACAGATCCTCAGAGTCAAGGACCGGGATGATTTCCCCATTGTGTGGTTGGGA  | 80 |
| Homo   | TTTCAAACGAGGTCGGCAAAGCTCTTTCACACAGATTTCTGGCGGTCAAGGACCGGAGAGATTTCCCCGTTGTGTGGTTGGGA | 80 |

  

|        |                                |     |
|--------|--------------------------------|-----|
| Mus    | ACAAGGCAGATCTGGAGAACACAGCGCCAG | 109 |
| Rattus | ACAAGGCAGATCTGGAGAACACAGCGCCAG | 109 |
| Cavia  | ACAAGGCAGATCTGGAGAACACAGCGCCAG | 109 |
| Homo   | ACAAGGCAGATCTGGAGTTCACAGCGCCAG | 109 |

ENSMUSG00000038387 exon 5 (ORF 0)

|        |                                                                                      |    |
|--------|--------------------------------------------------------------------------------------|----|
| Mus    | GTCCTCCGGTCTGAAGCCTCCTCTTTTCAGTGCTTCCCACCAATGACTTACTTTGAGGCCCTCAGCCAAACTGCGTCTGAA    | 80 |
| Rattus | GTCCTTCGATCAGAGCCTCCTCTTTTAGTGTCTCCCACCAATGACTTACTTTGAGGCCCTCAGCCAAACTGCGTCTAAA      | 80 |
| Cavia  | GTCCCCTCGATCTGAAGCCTCAGAACTTTGGGGCTCCCACCAATGTGGCTTACTTTGAGGCCCTTGCCAAACTGAGGCTCAA   | 80 |
| Homo   | GTCCCCTCGATCAGAAAGCCTCTGCCTTCGGGGCTCCCACCAATCGTGGCTTACTTTGAGGCCCTGAGCCAAACTGCGTCTCAA | 80 |

  

|        |                                         |     |
|--------|-----------------------------------------|-----|
| Mus    | TGTCGATGAGGCATTTGAGCAGCTGGTGCCCGCTGTCC  | 119 |
| Rattus | TGTCGATGAGGCATTTGAGCAGCTGGTGCCGACTGTCC  | 119 |
| Cavia  | CGTGGACGAGGCTTTGAGCAGCTGGTGCCGGCTGTCC   | 119 |
| Homo   | CGTGGACGAGGCTTTTGGAGCAGCTGGTGCCGGCTGTCC | 119 |

ENSMUSG00000038387\_intron\_4

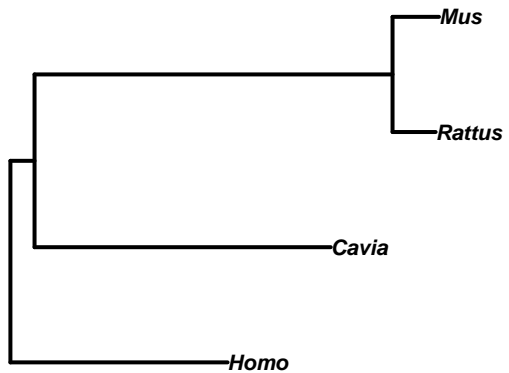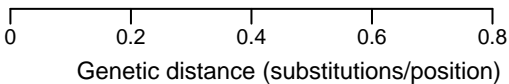

Mus Rattus Cavia Homo  
GTTTGAATGCCCCCTCCCTGGTCAACCCCATTTGGACCTAGGAAGCTCTCTCAGGTACCATCTCCCTAC.....CTGGATCCCTGGTCCCTCT 91  
GTTTGGATGCCCCCTCCCTGATCA.....CCCATTAGGACCGAGGAAGCTCTCTCAGG.....GACTGTCTCCTAC.....TCTGGATCACTGGTCTCTCT 89  
GTTTGGGCTGCCCTCTTTCTGGGGA.....CCCATCTCACTCTGGGAGGCTCTTCAGGCA.....CAAGCTGTGGCCATCAGGATCCTCTCTGTTCTCTAGGGGCTCC 56  
GTTTGGGCACTGCCCTCTTTCTGGGGA.....CCCATCTCACTCTGGGAGGCTCTTCAGGCA.....CAAGCTGTGGCCATCAGGATCCTCTCTGTTCTCTAGGGGCTCC 109

Mus Rattus Cavia Homo  
ATTGTCAACAACCTTTGACTTAAAGATGACCCCCCAAGAGGAATGCC.....CATCACTGAGCCACACCCCTGGG..... 161  
ATGTGACAGACTTTGACTTAAAGATGACCCCCCAAGTAGAATGAG.....CATTGTCTGAGCCACAGCGGATG..... 157  
AACAGCAACCCGGCTGCCAGGCTAGCCCACTTT.....CTTGTCTGAACCTGACATCCGCTGTGTG..... 119  
ATGTGACACAGGCTCAAGCTAGATGGGTACCCCAAACTGCACTTTCAAGGTCGCCCG.....CATCACGAGAGAGGGCTTAGGATGCAAGTGTCTCAGGAGAGGGCTGTGG 219

Mus Rattus Cavia Homo  
..... 161  
..... 157  
..... 119  
ACGGAACAAAGGACATTTACCCCCCGTCCGCCAGCTCTCTTTGCCCTTCTCGCATTCCTCCCTTCCAGCCAACTCCCAACGAGCCCAACGACCTCCCTCTCATGGC 329

Mus Rattus Cavia Homo  
.....CATCACTG.....AGGAT 175  
.....CATCACTG.....AGGAT 171  
CGGCCCCCTCCATGGCTCCCAAGTTCCTCCCAAGTGCCAGATGCCCGCACAGTTGCCCCCTCCTTTCCCTGCTCCATCACTTCCGCCA.....ACGAT 429

Mus Rattus Cavia Homo  
TCTAACAGAGAGCCCTAGCACTAGCCCACTCCTTGGCCCTTATAGTAATCCCTTGATACTGG.....TTCCCTGTCTTAAACAAG.....AACAGC 253  
TCTAGGCAGAGACCCAGCACTAGCCCACTCCTTGGCCCTTATAGTAATCCCTTGATACTGGTCCCTACTTGTAGTATATGTTCCCTGTCTTAAACAAG.....AACAGC 275  
TCTACACAGAACTC.....ATCTTTAGCCGAATCTT.....CTTGGGATTTCCAGCTTCAAGGGCT.....ACACTTGGCTCTGGCAAGACCAACATTC 254  
TCTACACAGAACTC.....ATCTTTAGCCGAAGCTT.....CTTGGGATTTCCAGGCTTTGGGG.....TCTGGCTGCTCTGGGG.....AACACC 510

Mus Rattus Cavia Homo  
CTTACTTCTTCCCTGCCCTGCTTCCAGTTAGCTAAAAACAC.....CTTCATAATCTTCCGCA..... 320  
CTTACTTCTTCCCTGCCCTGCTTCCAGTTAGCTAAAAACAC.....CTTCATAATCTTCCGCA..... 332  
CTTACTTCTTCCCTGCCCTGCTTCCAGTTAGCTAAAAACAC.....CTTCATAATCTTCCGCA.....GTAAAGCATGGTGGTGCATGCCAGCAATCCAGCAA 348  
CTGACTTCCCTGCTGCTTCCAGTTAGCTAAAAACAC.....CTTCATAATCTTCCGCA..... 582

Mus Rattus Cavia Homo  
.....CATCTCACTGATATCACTTCAACCC.....TCCA 349  
.....CATCTGGGCTGAT.....CC 352  
TCCCAGCATTCCAGGGAGCTGAGGCAGGAGGGTCAAAATGAAGCCCACTGGGGCAAATTAGTGACTTAGGGAGATCC.....GTCTTAAATAAATTTTGTGCTGT 458  
.....CCCTTACTTAAAGACAACAAGCCCTTCC 613

Mus Rattus Cavia Homo  
GTAGCCTCCTCTGGGGCTCTTC..... 371  
GATCTCCTCTTGGGCTCTTC..... 374  
AAATGACTTCAATAATTTTGTGTTTGTGTTTAACAAAGAGCTGAGGATATAGCTTAGTGTAAAAACCCCTGGCTTCCATCCCCATTACAACATAAAACATTTCCCTGA 568  
CATCTCCCTGCAATAATCTCTC..... 635

Mus Rattus Cavia Homo  
.....TAAACTTTCTATCTTGAAGCTTCTTCCAGT..... 401  
.....TAAACTTTCTATCTTGAAGCTTCTTCCAGT..... 404  
TTTTGTTTGTGTTTGGGGAGTAGTTTGAACAAGGCTTGTGTGTAACCTTAGGCTGGCCCTCAAACCTGGGAAAAATCTCTGGTGAAGGCTCTGAGCTGGGATCC 678  
.....AGGAGCTTCTCTCTTGGAGTCTCACAAGT..... 665

Mus Rattus Cavia Homo  
.....TATACACTGAGCACACCTTGGGGGCTTTGAGCATCTCCTCTCTCCGAGGCTCC..... 459  
.....TATACACTGAGCACACCTTGGGGGCTTTGAGCATCTCCTCTCTCCGAGGCTCC..... 459  
TGATTCCTTATTTCTATGATGTTAACTCCACGATGCCATAAGAACTTTGCCCTGGAGCTCCCAAGGCTCTAAAGCCTTTGGCTTCCCTAGCTGGGTCAGTC.....A 786  
.....GGTCACTTCTCTAGATTCAG.....CTTGGCTGTCTCTCTGGCTGGGTCAGCTGA 786

Mus Rattus Cavia Homo  
.....TTTCTCCTCTC.....CCTCTGCTTCTCCAG 488  
.....TCTGACCCTC.....CCTCTGCTTCTCCAG 487  
GTGGCAAGCTGAGCTCT.....GGCTGCACTGCTCCAG 824  
GTGCAGGACTGACTCCCGGTCTCCCTTACCCAG 768

ENSMUSG00000031349 intron 6

Description: Sterol-4-alpha-carboxylate 3-dehydrogenase, decarboxylating (Nsdhl)  
 Intron number: 6  
 Mouse chromosome: X  
 Upstream exon length: 103  
 Downstream exon length: 333  
 Mouse intron length: 842  
 Intron alignment length: 1541  
 Total murinae branch length: 0.17556  
 K\_score: 0.08711  
 Scaling factor: 0.55452

ENSMUSG00000031349 exon 6 (ORF 1)

|        |                                                                       |              |    |
|--------|-----------------------------------------------------------------------|--------------|----|
| Mus    | AAATGGGGAAGAACCTGGTGGACTTCACCTTCGTGGAGAATGTGGTTCATGGACACATCTTAGGCGCTT | GAGCACCTCTCC | 80 |
| Rattus | AAATGGGGAAGAACCTGGTGGACTTCACCTTCGTGGAGAATGTGGTTCATGGACACATCTTAGGCGCTT | GAGCACCTCTCC | 80 |
| Cavia  | AAATGGGGAAGAACCTGGTGGACTTCACCTTCGTGGAGAATGTGGTTCATGGACACATCTTAGGCGCTT | GAGCACCTCTCC | 80 |
| Homo   | AAATGGGGAAGAACCTGGTGGACTTCACCTTCGTGGAGAATGTGGTTCATGGACACATCTTAGGCGCTT | GAGCACCTCTCC | 80 |

  

|        |                         |     |
|--------|-------------------------|-----|
| Mus    | AAGATGCAGCTCTAGGTGGAAAG | 103 |
| Rattus | GAGATGCAGCTCTAGGTGGAAAG | 103 |
| Cavia  | GAGATGCAGCTCTAGGTGGAAAG | 103 |
| Homo   | GAGATGCAGCTCTAGGTGGAAAG | 103 |

ENSMUSG00000031349 exon 7 (ORF 0)

|        |                                                                                 |    |
|--------|---------------------------------------------------------------------------------|----|
| Mus    | GCATTTACATCACCAAAGATGAACCAATCCCTTTCTGGACGTTTCCTGTCCCGCATCTGACAGGCCTCAATTATGAGGC | 80 |
| Rattus | GCATTTACATCACCAAAGATGAACCAATCCCTTTCTGGACGTTTCCTGTCCCGCATCTGACAGGCCTCAATTATGAGGC | 80 |
| Cavia  | GCATTTACATCACCAAAGATGAACCAATCCCTTTCTGGACGTTTCCTGTCCCGCATCTGACAGGCCTCAATTATGAGGC | 80 |
| Homo   | GCATTTACATCACCAAAGATGAACCAATCCCTTTCTGGACGTTTCCTGTCCCGCATCTGACAGGCCTCAATTATGAGGC | 80 |

  

|        |                                                                                 |     |
|--------|---------------------------------------------------------------------------------|-----|
| Mus    | CCCTAAGTACCACATCCCTACTGGATGGCCTATACCTTGGCTTTCCTGCTATCTCTACTGCTGATGGTGGTCAGCCCTC | 160 |
| Rattus | CCCTAAGTACCACATCCCTACTGGATGGCCTATACCTTGGCTTTCCTGCTATCTCTACTGCTGATGGTGGTCAGCCCTC | 160 |
| Cavia  | CCCTAAGTACCACATCCCTACTGGATGGCCTATACCTTGGCTTTCCTGCTATCTCTACTGCTGATGGTGGTCAGCCCTC | 160 |
| Homo   | CCCTAAGTACCACATCCCTACTGGATGGCCTATACCTTGGCTTTCCTGCTATCTCTACTGCTGATGGTGGTCAGCCCTC | 160 |

ENSMUSG00000031349\_intron\_6

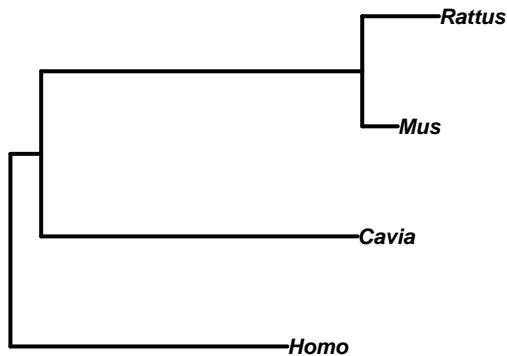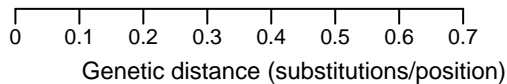



ENSMUSG00000032115 intron 13

Description: Hypoxia up-regulated protein 1 Precursor (Hyou1)

Intron number: 13

Mouse chromosome: 9

Upstream exon length: 139

Downstream exon length: 61

Mouse intron length: 1326

Intron alignment length: 1700

Total murinae branch length: 0.24623

K\_score: 0.06876

Scaling factor: 0.55665

ENSMUSG00000032115 exon 13 (ORF 1)

|        |                                                                                  |    |
|--------|----------------------------------------------------------------------------------|----|
| Mus    | GGTATTTGGCTCCCAGAATCTGACCACAGTAAAACTAAAAGGCGTGGGAGAGAGCTTCAAGAAATATCCCGACTATGAGT | 30 |
| Rattus | GGTATTTGGCTCCCAGAATCTGACCACAGTAAAACTAAAAGGTGTGGGAGAGAGCTTCAAGAAATATCCTGACTATGAGT | 30 |
| Cavia  | GGTATTTGGCTCTCAGAATCTGACCACAGTGAAGCTAAAAGGTGTGGGTGACAGCTTCAAGAAATATCCCGACTATGAGT | 30 |
| Homo   | GGTATTTGGCTCCCAGAATCTGACCACAGTGAAGCTAAAAGGTGTGGGTGACAGCTTCAAGAAATATCCTGACTATGAGT | 30 |

  

|        |                                                                |     |
|--------|----------------------------------------------------------------|-----|
| Mus    | CCAAAGGCATCAAGGCCCACTTTAACCTGGATGAGAGTGGCGTGCTCAGTTTAGACAGG    | 139 |
| Rattus | CCAAAGGCATCAAGGCCCACTTTAACCTAGAGGAGAGTGAAGTGCTCAGTTTAGACAGG    | 139 |
| Cavia  | CCAAAGGCATTAAGGCCA CACTTCAACTCTGGATGAGAGTGAAGTGCTCAGTCTAGACAGG | 139 |
| Homo   | CCAAAGGCATCAAGGCCCTCACTTCAACTCTGGATGAGAGTGGCGTGCTCAGTCTAGACAGG | 139 |

ENSMUSG00000032115 exon 14 (ORF 0)

|        |                                                               |    |
|--------|---------------------------------------------------------------|----|
| Mus    | GTGGAGTCCGTATTTGAGACCCTGGTGGAGGATAGCCAGAGGAAGAATCTACTCTTACCA  | 61 |
| Rattus | GTGGAGTCCGTATTTGAGACCCTGGTGGAGGACAGCCAGAGGAAGAGTCTACTCTTACCA  | 61 |
| Cavia  | GTAGAGTCTGTATTTGAGACCCTGGTGGAGAGACAGCCAGAGGAAGAATCTACTCTTACCA | 61 |
| Homo   | GTGGAGTCTGTATTTGAGACACTGGTAGAGGACAGCCAGAGAGGAATCTACTCTTACCA   | 61 |

ENSMUSG00000032115\_intron\_13

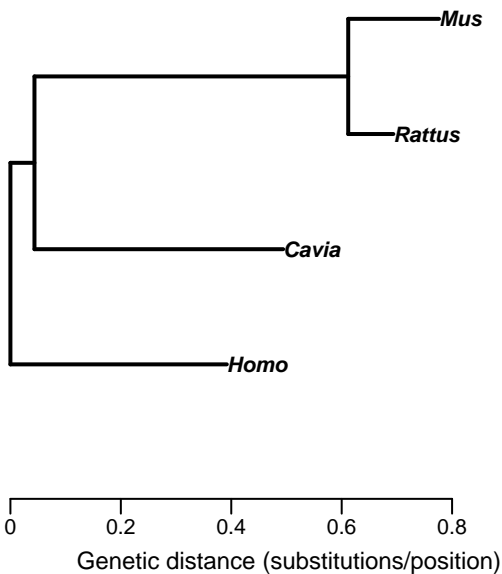

Mus Rattus Cavia Homo  
GTGAGAGTGAAGGGAACCCCTATCTGGTAGGGTGAACCCCTGGACACCAGCCCTCTGAGTGGTTTCACTGGATACCAAAAACATTT90  
GTGAGAGCAAAAGGGAACCCCTATCTGAGTAGGAGTGAACCCCTGGACACCAGCCCTCTGAGAGTAGGTTTCCAGAGATAAGCATAAAGCATT96  
GTGAGAGCAAAAGGGAACCCCTATCTGAGTAGGAGTGAACCCCTGGACACCAGCCCTCTGAGAGTAGGTTTCCAGAGATAAGCATAAAGCATT98  
GTGAGAGCAAAAGGGAACCCCTATCTGAGTAGGAGTGAACCCCTGGACACCAGCCCTCTGAGAGTAGGTTTCCAGAGATAAGCATAAAGCATT107  
Mus Rattus Cavia Homo  
CGGAACGAGATAGAAATGAATCTTGGTTTCTTTGACCCAGCAATAGTATAGTCACTGTAACCTTGGTTAGA...161  
TGAAGGCAATCTGCAATCTTGGTTTCTTTAGCAGAGTGTCCATTC...TCTGTAAAGTTGCTTAGA...190  
GGG...GTCTGGTAGTCTTGGCTT...TCTGTAAAGTTGCTTAGA...110  
AGGA...ATCAGAA...AATGTTGGCTTCAACAGAGCTA...CTGATCTGGTGCACACCCTGCTTATAGCTTATAATGCTTATAGCCATTTGAAATTTCTTGAACCTA212  
Mus Rattus Cavia Homo  
GGAAAAACAGATTTAAACACAAAGGGGGTGGAGAGATGGCTCGTGGTTAAAGCCACCAAGCTGCTTCTTGAAGGTCATGAGTTCAAATCACAAACATCCATAATGA269  
GAGAAATACAGATT...204  
TTGATGCTTTGATATAGGCATTTGTAATTTCTTGGACCAATTCATGCTTGAAGAACTCCACTCTTTTTT...119  
TCTTTAAAAACAAAAAACAAAAATTCAAACCATGTGTAGGCT...379  
AGCCGATCTTCTTGAAGACAGCTGCAGTGTGCTTACATATAATAATAAAGTAAATTTTTAAAAACAAAAAACAAAAATTCAAACCATGTGTAGGCT...230  
TTTTTTT...TTTAAACATGGTGGATA...166  
TTTTTTT...TTTGAAGGCTTGGCT...332  
Mus Rattus Cavia Homo  
ATGTC...TGCAGCATTTATGTACTGTGGCCATGAGGGCTAAACTGGATCTAGGATCCCTAGAACTGGAGTTAATAAATGGATGTGGATCT473  
ATGTC...TGCACGATTTATGTACTGTGGCCATGAGGGCTAAAGAGGATATGGATCCCTAGAACTGGAGTTAATAAATGGATGTGGATCT325  
GGAGTCACTTGGCTTGGCTCACTTTGTAGCCCTGGCTGGCTTGAACCTTGA...AGATCCCTCTGCCAGGATCCCAAATGGCTGGATCA261  
GTTACTTAAAGCTGGAATATAATAGGCTATGCTATAGGGATTCAGACCTTGAACAATTTGGCTTAA...ATGATCCCTCCATCCAGCCCTCTAGAGGCTGGAGCA437  
Mus Rattus Cavia Homo  
GGAGTGAACCCATTCATGGCCATCT...ACAGCCCATTAAGATTTTTTGAATGTGTGATATAAGGGATGGATCCAAAGCA562  
GGAAATGGACCCAGTGCAGCCATTTCT...CCAGCCCTTAAGGTTTTTGAATGTGTGATACAGAGTGGGGTGGGATGCCAGCA413  
AGCTATCTCCAGCAATCTTGGAAATTTTTGTACTTTATTTATAGAATAGGCTTCCCTATGTGCCAGACTGGCTCTAACCTCCGGATCAAGCGATCA547  
Mus Rattus Cavia Homo  
GCCACAGGAGTCTAGAGCCAGG...TGAACAGGAAACTAGTGGGTTCTCTCTCCCTTTCTGGAGAGTAACTAGCTTT...AGCTGGTGGCCATCTT657  
GGCACTGGAGTGGCTGAGAGGCA...GGAACAGGAAAGTACTTGGGTTCT...TACTTT...AGCTGGTGGCCATCTT648  
GCCAGGCTAAGTAGAAGCTGA...GTAGG...CTGCTGGGCTTAAAGCT...ATGGCACTGAAT...365  
GCTCAACCTCCGAAAGTACAGGATATGGTGGGAGCCCGCAGCCCTAGGAATCCACTTATTTATTTTACTTTTTTGGAGACAGACTTGGCTGTGT653  
Mus Rattus Cavia Homo  
CCAGCCAGAGAA...TCCCTCTTTAAATTCAG...TTTAAATAAATGTGGCAATGGTTGGCTGCACA724  
CCAGCCAGAGAA...TCCCTCTTTAAATTCAG...TTTAAAGTAAATGGATGGTGGTTGGCTGTACAT562  
TCAATACTGAGAACTACAGAAATGATTTGAGAAAGCCCACTTCTTTAAATTCAG...TGTCTCTAGGATATCTCTGGCAAAAGATGCCA452  
CCAGCTCTGAGTAGAGTGAAGTCTTCTGCAAGCTCCGCTCCGGGTTCAAGTGA...TCTCTCTGTCTAGGCTCTAGAGGCTGGATACAGGCTCCCTGGCACTCA763  
Mus Rattus Cavia Homo  
TCTCTCC...ATCATATGATTTCTGATCTCTCAGCAGCAACAAGAG...769  
TCTCTCC...ATCATAG...777  
CTGCTTAATTTTTGTTATTTGGAGTAGAGATAGGGTTTCAACATCTTGGCAGTCTGGTCTCAACC...CTGACTCA841  
Mus Rattus Cavia Homo  
GGAGTCAGATCCCTGGCTGT...GAGAGATGCTTGAGGCCCATCTCAATCTTGAACAATCTCTGGTTC...846  
GGTCTCAGATACCCCTGTCTGGAGGCT...TACAGATGGCTGCAAGCCACCATCTGCTGTGGGAAITGAACCGAGGACC...857  
AGGACCC...CTAGTCAGAGAGGCTGAGCACTAGGAGCCCTTAAGAAAGCAAGTGAAGGCCAAATTTAGCTCAGTGAACAAAGTGGATGCTGGCAAG623  
GTGATCCACCTGCCCTTCCCTCCAAAGTGTGTAGATTAACAGCAAT...AAAGCCACTGAGCTGGCCAGGAATCTCTTTTGAAGAACAAATCTGGGGTAAATAG944  
Mus Rattus Cavia Homo  
TACTGAAAACAGCTCCATGTTCTTCTTACAGAGCCATCTCTTCACTCCCAAAGAGTAATTTTGA...GCCAGGCTGGTGGTCCAGCACTTAGAGACAGAG948  
CTGGAAAGCACTCTGCTTAAAGCACTGAGCCATCTCTGAGCTGT...CTAGCTGGTGGGAAITGAACCGAGGACC...707  
TATGAGGTTCTGAGTGGCTGGCTTCTGCAAGTGAAGGCAAGGCAAGGCACTGATCTGCAACCTGATCCAGCAATCTGGAGCTGAG733  
GATGTAATAGCCAAAGAGTATG...AGTGGAGAAAGTGGG...GCTCTTTGGAGAACAAATCTGGGGTAAATAG1002  
Mus Rattus Cavia Homo  
GC...CACTCTCAGTTGAGGCCAGGCTGCTCTCAAAAATGACTCTAGGACAGCCAGGGCTCTGTGATATTGAGAGAAGTGTCTCCAAAAA...1053  
GAGAGGCAATTAGTGAAGTTGAGGCCAGGATGTTTATAAATGA...707  
GA...779  
1004  
Mus Rattus Cavia Homo  
GTTTTTCACTTAGAATTTTCTGGCCACGGGAAAAATGGTTTATTGATTGCAAGTGGAGCACTAGAGGACTCTATGGAGAGGAGTGGGAGCCCTGCTCTGAGAAACTG1163  
...GTTCCAGGCCCTGCCAGAACTACATACCAAACTCTGCTCTGAGAGGGCT...707  
...GCTGGAGCCCTATTCATGAGAGGGCT...821  
...C1030  
Mus Rattus Cavia Homo  
GCATTAAGAGGA...GATTCTGCATCTAGGAGTCTAGAAAAGGAGGGTGAAGAGTATAGATCTCTAACAGGTGCAAGTCAATTTTGTATTCTAGTGTATGCATAAGCA...1269  
TAAATCAAAAGAGATGGCACTCACCTCCAAGTCTTAGAAAAGGCAAGTGAAGAGTACTAGGCTGTGAGCCG...GTGATTTTGTATTCTAGCTTTTGTATTCTAGCTTTGCAATAGCA...738  
TTAATCAAAAGAGATGGCACTCACCTCCAAGTCTTAGAAAAGGCAAGTGAAGAGTACTAGGCTGTGAGCCG...ATGGAGTGTGATAAGCACT864  
Mus Rattus Cavia Homo  
GCACACTTGTGGAGAGCA...T1288  
GCATCCCTGCAAGAGCA...T758  
CGCTCCTTGGCAAGTGTTTTATGGAGAAAATGCCACTGGCCTGAAACTTGCAGTGTCTTCTGCCTCAGCCCTCTGAGTACTGGAATTGCAAGGTGTGTCCACTGTGCC974  
CACCGACTTGGCAAGTGTTTTGTGGAGAAAAGG...T1156  
Mus Rattus Cavia Homo  
GGTCTATGTGATTTTAA...CCGATTTCAA...ATAG1326  
GGGTATCTGCAAGTATTTAAAAACTTTTTTTCAA...ATAG799  
AGGTAAGCTGCTCT...TTGATTTGAAACCTTTTCTAG1015  
GATAGCTGTGATTTT...TTCAATTTGAACCTGTTTCTAG1197



ENSMUSG00000024382 intron 4

Description: TFIIH basal transcription factor complex helicase XPB subuni (Ercc3)  
 Intron number: 4  
 Mouse chromosome: 18  
 Upstream exon length: 50  
 Downstream exon length: 136  
 Mouse intron length: 640  
 Intron alignment length: 718  
 Total murinae branch length: 0.43263  
 K\_score: 0.07292  
 Scaling factor: 0.56463

ENSMUSG00000024382 exon 4 (ORF 0)

|        |   |   |   |   |   |   |   |   |   |   |   |   |   |   |   |   |   |   |   |   |   |   |   |   |   |   |   |   |   |   |   |   |   |   |   |   |   |   |   |   |   |   |   |   |   |   |   |   |    |    |    |
|--------|---|---|---|---|---|---|---|---|---|---|---|---|---|---|---|---|---|---|---|---|---|---|---|---|---|---|---|---|---|---|---|---|---|---|---|---|---|---|---|---|---|---|---|---|---|---|---|---|----|----|----|
| Mus    | C | T | G | T | C | A | C | T | G | T | C | A | G | C | T | A | T | G | G | G | A | A | G | C | T | C | A | A | G | C | T | G | G | T | C | C | T | C | A | A | G | C | A | C | A | C | A | G | 50 |    |    |
| Rattus | C | T | G | T | C | A | C | T | G | T | C | A | G | C | T | A | T | G | G | G | A | A | A | A | G | C | T | C | A | A | G | C | T | G | G | T | C | C | T | C | A | A | G | C | A | C | A | C | A  | G  | 50 |
| Cavia  | T | T | G | T | G | T | A | C | T | G | T | C | A | G | C | T | A | T | G | G | A | A | A | A | A | G | C | A | A | G | C | T | G | G | T | C | C | T | C | A | A | G | C | A | C | A | C | A | G  | 50 |    |
| Homo   | T | T | G | T | G | T | A | C | T | G | T | C | A | G | C | T | A | T | G | G | A | A | A | A | A | G | C | A | A | G | C | T | G | G | T | C | C | T | C | A | A | G | C | A | C | A | C | A | G  | 50 |    |

ENSMUSG00000024382 exon 5 (ORF 1)

|        |   |   |   |   |   |   |   |   |   |   |   |   |   |   |   |   |   |   |   |   |   |   |   |   |   |   |   |   |   |   |   |   |   |   |   |   |   |   |   |   |   |   |   |   |   |   |   |   |   |   |   |   |   |   |   |   |   |   |   |   |   |   |   |   |   |   |   |   |   |   |   |   |   |   |   |    |    |
|--------|---|---|---|---|---|---|---|---|---|---|---|---|---|---|---|---|---|---|---|---|---|---|---|---|---|---|---|---|---|---|---|---|---|---|---|---|---|---|---|---|---|---|---|---|---|---|---|---|---|---|---|---|---|---|---|---|---|---|---|---|---|---|---|---|---|---|---|---|---|---|---|---|---|---|---|----|----|
| Mus    | G | T | A | C | T | T | T | G | T | T | G | A | A | A | G | T | T | C | C | A | C | C | T | G | A | T | G | T | A | T | C | C | A | G | C | A | T | C | T | T | C | T | T | C | A | A | G | A | C | C | C | A | G | T | G | A | T | C | C | G | G | A | A | T | G | T | C | G | C | T | T | G | A | G | G | A  | 80 |
| Rattus | G | T | A | C | T | T | T | G | T | T | G | A | A | A | G | T | T | C | C | A | C | C | T | G | A | T | G | T | A | T | C | C | A | G | C | A | T | C | T | T | C | T | T | C | A | A | G | A | C | C | C | A | G | T | A | T | C | C | G | G | A | A | T | G | T | C | G | C | T | T | G | A | G | G | A | 80 |    |
| Cavia  | G | T | A | C | T | T | C | G | T | T | G | A | A | A | G | T | T | C | C | C | A | C | C | T | G | A | T | G | T | A | T | C | C | A | G | C | A | T | C | T | C | T | T | C | A | A | G | A | C | C | C | A | G | T | G | A | T | C | C | G | G | A | A | T | G | T | C | G | C | T | T | G | A | G | G | A  | 80 |
| Homo   | A | T | A | C | T | T | C | G | T | T | G | A | A | A | G | T | T | G | C | C | A | C | C | T | G | A | T | G | T | A | T | C | C | A | G | C | A | T | C | T | T | C | T | T | C | A | A | G | A | C | C | C | A | G | T | G | A | T | C | C | G | G | A | A | T | G | T | C | G | C | T | T | A | G | A | A  | 80 |

  

|        |   |   |   |   |   |   |   |   |   |   |   |   |   |   |   |   |   |   |   |   |   |   |   |   |   |   |   |   |   |   |   |   |   |   |   |   |   |   |   |   |   |   |   |   |   |   |   |   |   |   |   |   |   |   |     |     |   |     |     |
|--------|---|---|---|---|---|---|---|---|---|---|---|---|---|---|---|---|---|---|---|---|---|---|---|---|---|---|---|---|---|---|---|---|---|---|---|---|---|---|---|---|---|---|---|---|---|---|---|---|---|---|---|---|---|---|-----|-----|---|-----|-----|
| Mus    | A | G | C | C | G | A | G | G | G | C | G | A | G | G | C | C | A | C | G | A | A | C | T | C | A | T | C | A | C | A | G | A | G | A | C | T | T | T | T | A | C | A | A | G | C | A | A | A | T | C | T | G | C | T | 136 |     |   |     |     |
| Rattus | A | T | G | C | C | G | A | G | G | G | A | G | A | G | G | C | T | A | C | T | G | A | A | C | T | C | A | T | C | A | C | A | G | A | G | A | C | T | T | T | A | C | G | A | G | C | A | A | A | T | C | T | G | C | T   | 136 |   |     |     |
| Cavia  | A | T | G | C | T | G | A | G | G | G | G | A | G | C | A | C | T | G | A | A | C | T | G | A | A | C | T | C | A | T | C | A | C | A | G | A | G | A | C | T | T | C | A | C | A | A | G | C | A | A | A | T | C | T | G   | C   | T | 136 |     |
| Homo   | A | C | T | C | T | G | A | A | G | G | G | A | G | G | C | A | C | T | G | A | A | C | T | G | A | A | C | T | C | A | T | C | A | C | A | G | A | G | A | C | T | T | C | A | C | A | A | G | C | A | A | A | T | C | T   | G   | C | T   | 136 |

ENSMUSG00000024382\_intron\_4

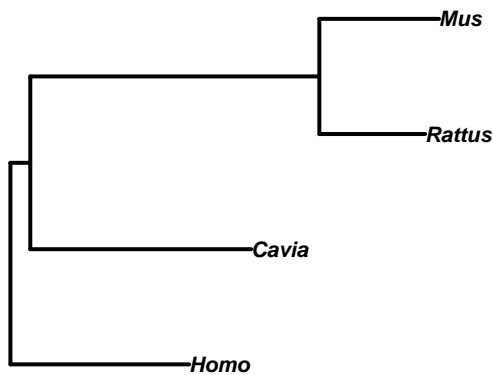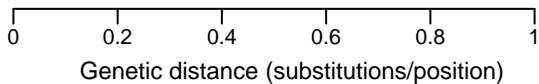

Mus  
Rattus  
Cavia  
Homo

G T G A C . . . . . C A C T G C C C T C T G T G C C A G C C G G G A G G G A G G G A G G G A G G G A G G G A G G G A G G C 71  
G T G A G . . . . . T A C T G C C T T C T A C A T G C C A G T A G G A G . . . . . T G G A 33  
G T A A G A T G C A C T G T G C T T C C A T G A T G C C T T A T C C T A A G C A T T T T C A T G C C T G T C C A G A G G A A G . . . . . 72  
G T A A G . . . . . A G A T T C C A T G A C A G G G C T T C C C A A G G A A C T G T A C T T T C T G C C A C C A G A G A A A . . . . . 63

Mus  
Rattus  
Cavia  
Homo

T G G A G G G C A G G A G G G A G G G A G A G A G C G A G G A G A A G G G A G A G A G C C G G A G G A G G C C G C C T C A C A C C C T T C C . . . . . T G A C A 155  
. . . . . G A G G C G T A G C T A G A G G A G T C C T T G A B G C C G G G T G A C A G C T G C T . . . . . T G G A 89  
. . . . . A A G G A T T G G G A A G G A C C T G A T G T T T A T G C T C T C T . . . . . T T C C T G A A G 140  
. . . . . A A G G A T T G G G A A G G A C C T G A T G T T T A T G C T C T C T . . . . . T T C C T G A A G 140

Mus  
Rattus  
Cavia  
Homo

C A T A G A T G G G G A G T T C . . . . . A C C G A A C C C G G A A G G A A A G G A G C C C T C A G G G A C T G A C C C T C A A G C G . T C T G A A C T T A A C A T T T G C A G T G A T G A T G 254  
C A G A G A T G G A A A G C C . . . . . A G G G C C T G G G A A G G A A A G G A G T C C T T C C A G C . . . . . T G A T A A T C A A G A A T T C T G G A C G T T A A C A T T T G C A G T G A T G C T A C C 185  
C A C A G A T A A A A G A C C C A . . . . . A T G T G C C C A A G T G G A A A . . . . . C C C A T T C A G C . . . . . T G A T A A T C A A G A A T T C T G G A C G T T A A C A T T T G C A G T G A T G C T A C C 187  
C A C A G A T A A A G A C C C A . . . . . A T G T G C C C A A G T G G A A A . . . . . C C C A T T C A G C . . . . . T G A T A A T C A A G A A T T C T G G A C G T T A A C A T T T G C A G T G A T G C T A C C 185

Mus  
Rattus  
Cavia  
Homo

C A C A C A G G C A T A G G C T T C C T T T T T A C A T A C A G A T G C T T T A A G A A G A . C C T G A A T C G A C G G A C C A C A C T C A A G C T G A G A G C A T T C T G A C C T T T G A G T T T A A C T C T 363  
T G C A T A C A G C T T . . . . . T T C C C T T T T T A T A C A G A T G C T T T A A G A A G A . C C T G A A T C G A C G G A C C A C A C T C A A G C T A T A A G C A T T C T . . . . . G A C C T T G A T T T T A A C T G T 289  
. . . . . A C C T A C T G A . . . . . G G C A C H T A . . . . . 197  
. . . . . G G C A C H T A . . . . . 175

Mus  
Rattus  
Cavia  
Homo

G C T C C T T T C C C G . G G T G A A C C A G G T T A G G A G A T T C A C A G G A A G G C C T T T T T A C T C C T G C T G C T . . . . . G A C A T G C T G A C T T A A C T T C A G G T C C C G . T C T C C T C T G A C C 472  
A C T T T T T G C A G G T . G T A G A C T T A C T T T T A G G A G A T T T C A G A G G A A G G T T A T T T T C C T G C T G C T . . . . . T A C A T G C C A T T T A A C T T C A A A G G G G C T C T C C T C T G A C C 399  
. . . . . T T C C A T A G T T G C A G A A C T G G G G C T T A . . . . . C A C C T T C T G A T T G A T T T C A G A T T G A G G A T T T G C C G . . . . . A A A A 267  
. . . . . T T T C C T C T A G C A G T G A G C T G G C T C A G G . . . . . C C C T G C T A C T T G A C C T C A A A G T C A C . . . . . A A C C 235

Mus  
Rattus  
Cavia  
Homo

T C A G C C T G T T A G A G C T T T G C C A T A G C C C T C T C T C G A T T T G A C A A A G T G T G G G A G A G T C A T T A G A G G C T G T A A T T T C A G A T C A C C C A A C T G A G T T A C A A T T G C A 582  
T C A G C A T G T T C T G T C T T T G C C T A T A G C C C T A G C T C T G A T T T G A C A G G G C . T G G G A G A G T C A C T G T G A G G C T A T A A C T T T C A G A T C A C T G A C T . . . . . 494  
G T C T G T G T T A T T T A T G A C C A G C C T T A T A A T T C A A T T T G C C A A G G G . T . . . . . A T T C T A T G A G G T G A C A A T T T C A G A C C A T T G A A T C A A T . . . . . C A G T G C T A 367  
C T C A T A T G T T A A T C A T G C C G G C A G C A T G T A C A G A T T T G C C A A G G . T T G T G G C A G A C T C A T G A G G C T T G T A T T T C A G A C C A T G A A T T G A A T . . . . . G A G C A C T G 342

Mus  
Rattus  
Cavia  
Homo

G A A T G T T C T A G A A A T C A G T G C T G G C C A G C A G G G A C T C C T T C C T C C C T G C T T G T A G 640  
G A A T G T T C A G A A A T G A T T G C C T G G C C A G T A G . A C T T C T T T T C T C T C C T G C T T G A G 551  
G A A T G T T C A G A A A T G A T T G C C T G G C C A G T A G T A T G C C T T C T T G C C G T G C T T G A G 425  
G A A T C T C A G A G G T . A C C T G C T G T C A G T A G C C C T T C T T C C T G C C C T G C T T G A G 399

ENSMUSG00000036733 intron 7

Description: RNA-binding protein 42 (Rbm42)

Intron number: 7

Mouse chromosome: 7

Upstream exon length: 333

Downstream exon length: 118

Mouse intron length: 209

Intron alignment length: 248

Total murinae branch length: 0.21614

K\_score: 0.07753

Scaling factor: 0.56546

ENSMUSG00000036733 exon 7 (ORF 0)

|        |                                                                                  |    |
|--------|----------------------------------------------------------------------------------|----|
| Mus    | GGCCCTCGCCATGCCCTTGCCTGAGCCTGAGCCCTTGGCCCTCCCACTGGAGGTGGTACCTGGCCTGCTGCCTCCGCTGA | 80 |
| Rattus | GGCCCTAGCCATGCCCTTGCCTGAGCCTGAGCCCTTGGCCCTCCCACTGGAGGTGGTACCTGGCCTGCTGCCTCCGCTGA | 80 |
| Cavia  | GGCCCTGGCCATGCCCTTGCCTGAGCCTGAGCCCTTGGCCCTCCCACTGGAGGTGGTACCTGGCCTGCTGCCTCCGCTGA | 80 |
| Homo   | GGCCCTGGCCATGCCCTTGCCTGAGCCTGAGCCCTTGGCCCTCCCACTGGAGGTGGTACCTGGCCTGCTGCCTCCGCTGA | 80 |

  

|        |                                                                                |     |
|--------|--------------------------------------------------------------------------------|-----|
| Mus    | GAATTCCTGAGCTCTTGTCTCTCCGTCCACGACCTCGGCCCTCGGCCTGAGCCTCCTCCTGGCCTCATGGCCCTAGAG | 160 |
| Rattus | GAATTCCTGAGCTCTTGTCTCTCCGTCCACGACCTCGGCCCTCGGCCTGAGCCTCCTCCTGGCCTCATGGCCCTAGAG | 160 |
| Cavia  | GAATTCCTGAGCTCTTGTCTCTCCGTCCACGACCTCGGCCCTCGGCCTGAGCCTCCTCCTGGCCTCATGGCCCTAGAG | 160 |
| Homo   | GAATTCCTGAGCTCTTGTCTCTCCGTCCACGACCTCGGCCCTCGGCCTGAGCCTCCTCCTGGCCTCATGGCCCTAGAG | 160 |

ENSMUSG00000036733 exon 8 (ORF 0)

|        |                                                                                |    |
|--------|--------------------------------------------------------------------------------|----|
| Mus    | GTGCCAGAGCCACTGGGTGAAGACAAGAAGAAAGGCAAGCCAGAGAAATCGAAACGCTGCATTGCACAGCAGCGGGAG | 80 |
| Rattus | GTGCCAGAGCCACTGGGTGAAGACAAGAAGAAAGGCAAGCCAGAGAAATCGAAACGCTGCATTGCACAGCAGCGGGAG | 80 |
| Cavia  | GTGCCAGAGCCACTGGGTGAAGACAAGAAGAAAGGCAAGCCAGAGAAATCGAAACGCTGCATTGCACAGCAGCGGGAG | 80 |
| Homo   | GTGCCAGAGCCACTGGGTGAAGACAAGAAGAAAGGCAAGCCAGAGAAATCGAAACGCTGCATTGCACAGCAGCGGGAG | 80 |

  

|        |                                       |     |
|--------|---------------------------------------|-----|
| Mus    | CAGCTGGGAGGACCCACGCCTGCTGGAGTGGGATGCC | 118 |
| Rattus | CAGCTGGGAGGACCCACGCCTGCTGGAGTGGGATGCC | 118 |
| Cavia  | CAGCTGGGAGGACCCACGCCTGCTGGAGTGGGATGCC | 118 |
| Homo   | CAGCTGGGAGGACCCACGCCTGCTGGAGTGGGATGCC | 118 |

ENSMUSG00000036733\_intron\_7

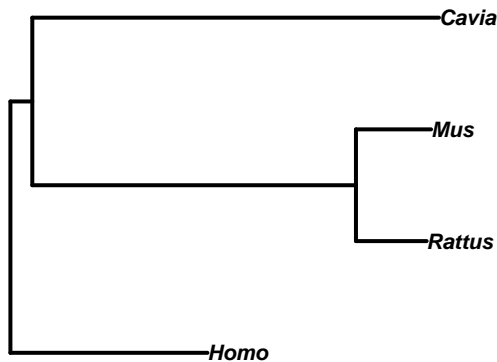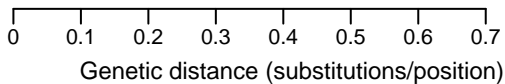

|        |                                                                                                                                                                                                                     |
|--------|---------------------------------------------------------------------------------------------------------------------------------------------------------------------------------------------------------------------|
| Mus    | G T A A G C A G G G A A T T - - C G G A G A G G G G A C A G A A A G G C C A G G A G A G A C C A G A A G C C T A T G A G T T C C A C A C A C A G A - - - - - G G G T C C C G G T G A G 87                            |
| Rattus | G T A A G C A G G G A A T T G T C A G A G A G G G G A C A G A A A G G C C A G G A G A A A G C A G G A G C C A T G A G C T T C C A C A C A G A A A C A C A S T C C T C T C A C C A G A G G T G G T G G G A G G G 109 |
| Cavia  | G T A A G C A G A G A C A T A C C A A T G G A A G A C A C E - - - - - G C A G G A A C T G T G G C T T T A C A C A G A G T C T C T G C A G A C C A G A G A G G A C T C A A G G A C A 83                              |
| Homo   | G T A A G C A G G G A G C T A G G G T G A A G G G A C A G A G G G A G G G G C C A G A C A G A G A G C C A G A A C T T C C A C A C A G A C A G A C G G A G A C G A C - - - - - G A G G A C G T G G G G A 103         |
| Mus    | G G G A G G C A A C C C T C A T A C T C C A C G T C T G G A A G C A G A T C T A G T G C T T G A A T G G A A G G T G C C A T G G C T G G A G A C - G T T C C A G A G C A T G A G A C T T C C A - - - - - 182         |
| Rattus | G A G A G G C A G C C C T T A C A C T C C A C A T C T G G A A G C G G T C T A C T A C T T G A A T G T G A G T G C C A T G G A T G G A G G G T C T C C A G A G C A C A G A G T T G C A - - - - - 204                 |
| Cavia  | G G G A G G C A G A C A G C A A C C T A C - - C C G A A G C A T A T G - A C T C G T G T A C T G G A G T A G G G G A C A A G T T C A A G C A A G T G A A G A C T G T A G C A T C A A G T C C T T T G 199             |
| Homo   | G G G A G G C G A C A C A T T G T C C C C A C A T C A G A A G C A C A T C A G C C C T T A C T G T G T G C A G A G G G C G G G A C C A A A G C A A G T G G A G A C C C C A A T A C C A A C C C C T T T G 213         |
| Mus    | - A C A C C C T T C C C T T C C T T C C C C T A T A G 209                                                                                                                                                           |
| Rattus | - A C A G C C T T C C C T T C C C C - - - T G T A G 227                                                                                                                                                             |
| Cavia  | T A C G C C A T C T G C T T G C T C - - - T G C A G 223                                                                                                                                                             |
| Homo   | C A G - G T C T C C C C T T T C C T C - - - T G C A G 236                                                                                                                                                           |

ENSMUSG00000030865 intron 1

Description: Calcineurin B homologous protein 2 (2010110P09Rik)  
 Intron number: 1  
 Mouse chromosome: 7  
 Upstream exon length: 67  
 Downstream exon length: 73  
 Mouse intron length: 698  
 Intron alignment length: 847  
 Total murinae branch length: 0.17131  
 K\_score: 0.07041  
 Scaling factor: 0.5674

ENSMUSG00000030865 exon 1 (ORF 0)

|        |                                                                     |    |
|--------|---------------------------------------------------------------------|----|
| Mus    | ATGGGCTCACCAGCTCTCATATCGCGGCTCATTCCAGACGTGGAGCACATTCCGAGAGAGACAGGCT | 67 |
| Rattus | ATGGGCTCACCAGCTCTCATATCGCGGCTCATTCCAGACGTGGAGCACATTCCGAGAGAGACAGGCT | 67 |
| Cavia  | ATGGGCTCAGTGCAGCTCCCAAGCGCGGCTCATTCCGAGACATTCCGAGAGAGACTGGCT        | 67 |
| Homo   | ATGGGGTTCGCGCAGCTCCCAAGCGCGGCTCATTCCGAGACATTCCGAGAGAGACTGGCT        | 67 |

ENSMUSG00000030865 exon 2 (ORF 2)

|        |                                                                          |    |
|--------|--------------------------------------------------------------------------|----|
| Mus    | TCTCCCAAGCCAGCCTGCTCCGCCTCTACCACCGGTTCCAAGCCCTGGACAGGATGAAAAGGGCTTCCTAAG | 73 |
| Rattus | TCTCCCAAGCCAGCCTGCTCCGCCTCTACCACCGGTTCCAAGCCCTGGACAGGATGAAAAGGGCTTCCTAAG | 73 |
| Cavia  | TCTCCCAAGCCAGTCTGCTCCGCCTCTACCACCGGTTCCGGGCTGGACAGGAACAATAAGGGCTATTGAG   | 73 |
| Homo   | TCTCCCAAGCCAGCCTGCTCCGCCTCTACCACCGGTTCCGGGCTGGACAGGAATAAATAAGGGCTACCTGAG | 73 |

ENSMUSG00000030865\_intron\_1

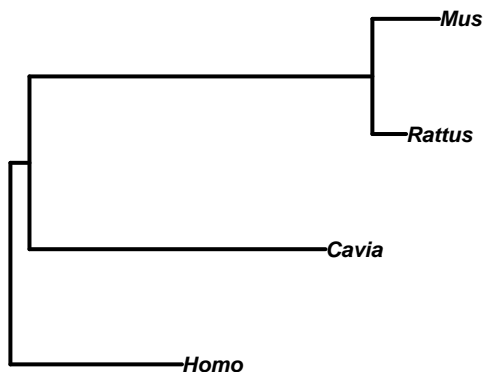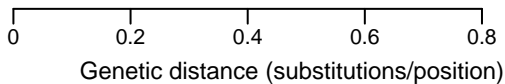



ENSMUSG00000020051 intron 12

Description: Phenylalanine-4-hydroxylase (Pah)

Intron number: 12

Mouse chromosome: 10

Upstream exon length: 116

Downstream exon length: 47

Mouse intron length: 1568

Intron alignment length: 2102

Total murinae branch length: 0.27535

K\_score: 0.05589

Scaling factor: 0.56744

ENSMUSG00000020051 exon 12 (ORF 1)

|        |     |      |      |     |     |      |     |     |       |      |     |     |     |      |      |     |     |     |      |      |     |     |     |     |     |     |     |     |    |    |    |
|--------|-----|------|------|-----|-----|------|-----|-----|-------|------|-----|-----|-----|------|------|-----|-----|-----|------|------|-----|-----|-----|-----|-----|-----|-----|-----|----|----|----|
| Mus    | GAC | TTTT | GCT  | GCC | ACA | CAAT | CCC | C   | CGGCC | CTT  | CTC | CG  | GTT | CGCT | ATG  | ACC | CCT | TAC | ACT  | CAA  | AGG | CTT | GAG | GTC | CT  | GGA | CA  | ATA | 80 |    |    |
| Rattus | GAC | TTTT | GCT  | GCC | ACA | CAAT | CCC | C   | CGGCC | CTT  | CTC | CG  | GTT | CGCT | ATG  | ACC | CCT | TAC | ACT  | CAA  | AGG | CTT | GAG | GTC | CT  | GGA | CA  | ATA | 80 |    |    |
| Cavia  | GAA | CTT  | CGCT | GCC | ACA | CAAT | CCC | C   | CGGCC | CTT  | CTC | CA  | GTT | CA   | TTA  | CGA | ACC | CT  | TACA | CG   | CAA | AGG | ATG | GAG | GTC | CT  | GGA | CA  | CG | 80 |    |
| Homo   | GAA | CTT  | GCT  | GCC | ACA | CAAT | A   | CCT | C     | GGCC | CTT | CTC | CA  | GTT  | CGCT | A   | CGA | ACC | AT   | TACA | CG  | CAA | AGG | ATG | GAG | GTC | CT  | GGA | CA | TA | 80 |

  

|        |     |     |     |     |     |      |      |      |      |      |      |      |     |     |
|--------|-----|-----|-----|-----|-----|------|------|------|------|------|------|------|-----|-----|
| Mus    | CTC | AGC | AGT | TGA | AG  | TTTT | AGCT | GACT | CC   | ATTA | ATA  | 116  |     |     |
| Rattus | CTC | AGC | AGT | TGA | AG  | TTTT | AGCT | GACT | CC   | ATTA | ATA  | 116  |     |     |
| Cavia  | CC  | CAG | CAG | CT  | GAA | GA   | CT   | GG   | CG   | GACT | CC   | ATTA | ATA | 116 |
| Homo   | CC  | CAG | CAG | CT  | TAA | GA   | TTTT | GGCT | GATT | CC   | ATTA | ATA  | 116 |     |

ENSMUSG00000020051 exon 13 (ORF 2)

|        |    |     |     |     |    |     |    |     |   |     |    |    |    |     |     |     |     |     |   |   |   |    |    |
|--------|----|-----|-----|-----|----|-----|----|-----|---|-----|----|----|----|-----|-----|-----|-----|-----|---|---|---|----|----|
| Mus    | GT | GAG | GT  | GGA | AT | CCT | TT | GCA | T | GCC | CT | GC | A  | GAA | AA  | TAA | AGT | C   | A | T | G | A  | 47 |
| Rattus | GT | GAG | GT  | GGA | AT | CCT | TT | GCA | T | GCC | CT | GC | A  | GAA | AA  | TAA | AGT | C   | A | T | G | A  | 47 |
| Cavia  | GT | GAA | GT  | GGA | AT | CCT | TT | GCA | T | GCT | T  | CT | GC | A   | GAA | AA  | TAA | AGT | - | - | G | A  | 44 |
| Homo   | GT | GAA | ATT | GGA | AT | CCT | TT | GCA | T | GCC | CT | CC | A  | GAA | AA  | TAA | AGT | -   | - | A | A | 44 |    |

ENSMUSG00000020051\_intron\_12

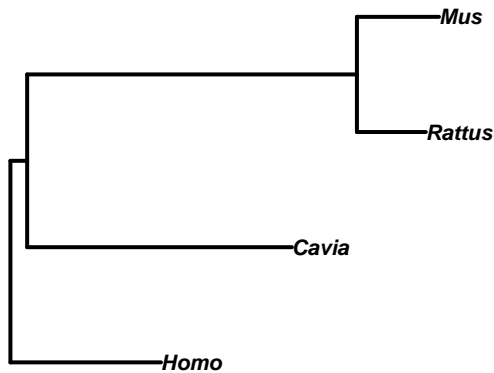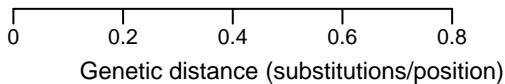

Mus 104  
Rattus 137  
Cavia 95  
Homo 107

Mus 187  
Rattus 207  
Cavia 207  
Homo 217

Mus 286  
Rattus 304  
Cavia 304  
Homo 311

Mus 382  
Rattus 376  
Cavia 384  
Homo 407

Mus 482  
Rattus 451  
Cavia 488  
Homo 517

Mus 572  
Rattus 561  
Cavia 595  
Homo 586

Mus 642  
Rattus 623  
Cavia 705  
Homo 586

Mus 715  
Rattus 689  
Cavia 815  
Homo 586

Mus 715  
Rattus 689  
Cavia 815  
Homo 586

Mus 756  
Rattus 728  
Cavia 1035  
Homo 586

Mus 862  
Rattus 831  
Cavia 1121  
Homo 637

Mus 934  
Rattus 903  
Cavia 1231  
Homo 638

Mus 1010  
Rattus 979  
Cavia 1341  
Homo 638

Mus 1089  
Rattus 1046  
Cavia 1438  
Homo 706

Mus 1179  
Rattus 1136  
Cavia 1547  
Homo 805

Mus 1289  
Rattus 1231  
Cavia 1627  
Homo 889

Mus 1399  
Rattus 1298  
Cavia 1689  
Homo 966

Mus 1489  
Rattus 1406  
Cavia 1799  
Homo 1063

Mus 1556  
Rattus 1474  
Cavia 1906  
Homo 1169

Mus 1568  
Rattus 1486  
Cavia 1918  
Homo 1181



ENSMUSG00000064158 intron 2

Description: Izumo sperm-egg fusion protein 1 Precursor (Izumo1)  
 Intron number: 2  
 Mouse chromosome: 7  
 Upstream exon length: 75  
 Downstream exon length: 87  
 Mouse intron length: 766  
 Intron alignment length: 856  
 Total murinae branch length: 0.23960  
 K\_score: 0.06154  
 Scaling factor: 0.5676

ENSMUSG00000064158 exon 2 (ORF 2)

|        |   |   |   |   |   |   |   |   |   |   |   |   |   |   |   |   |   |   |   |   |   |   |   |   |   |   |   |   |   |   |   |   |   |   |   |   |   |   |   |   |   |   |   |   |   |   |   |   |   |   |   |   |   |   |   |   |   |    |   |    |    |
|--------|---|---|---|---|---|---|---|---|---|---|---|---|---|---|---|---|---|---|---|---|---|---|---|---|---|---|---|---|---|---|---|---|---|---|---|---|---|---|---|---|---|---|---|---|---|---|---|---|---|---|---|---|---|---|---|---|---|----|---|----|----|
| Mus    | A | G | G | A | A | C | A | C | A | C | T | G | A | A | C | A | A | G | C | A | A | C | C | T | G | A | G | G | A | T | C | T | G | A | A | C | C | T | A | T | T | A | C | A | G | A | C | A | G | T | G | A | C | T | T | A | A | A  | A | G  | 75 |
| Rattus | A | T | G | A | G | A | A | C | A | C | T | G | A | A | C | C | A | A | G | C | A | A | C | C | T | A | T | T | A | C | G | A | C | A | G | A | T | C | T | T | A | C | A | G | A | G | T | G | A | C | T | T | A | A | A | A | G | 75 |   |    |    |
| Cavia  | A | T | G | A | G | A | A | C | A | C | T | G | A | A | C | C | A | A | G | C | A | A | C | C | T | A | T | T | A | C | G | A | C | A | G | A | T | C | T | T | A | C | A | G | A | G | T | G | A | C | T | T | A | A | A | A | G | 75 |   |    |    |
| Homo   | A | T | G | A | G | G | C | A | C | A | C | T | G | A | A | A | G | G | C | A | T | C | C | T | G | A | G | A | T | C | T | G | A | A | C | C | T | A | T | T | A | C | A | G | A | C | A | G | T | G | A | C | T | T | A | A | A | A  | G | 75 |    |

ENSMUSG00000064158 exon 3 (ORF 2)

|        |   |   |   |   |   |   |   |   |   |   |   |   |   |   |   |   |   |   |   |   |   |   |   |   |   |   |   |   |   |   |   |   |   |   |   |   |   |   |   |   |   |   |   |   |   |   |   |   |   |   |   |   |   |   |    |   |   |    |   |   |   |    |
|--------|---|---|---|---|---|---|---|---|---|---|---|---|---|---|---|---|---|---|---|---|---|---|---|---|---|---|---|---|---|---|---|---|---|---|---|---|---|---|---|---|---|---|---|---|---|---|---|---|---|---|---|---|---|---|----|---|---|----|---|---|---|----|
| Mus    | G | A | G | A | G | A | A | C | T | A | T | T | G | A | T | G | C | T | T | C | T | C | A | T | C | A | A | A | G | G | A | C | A | T | C | T | T | A | A | C | A | A | T | C | T | T | G | C | T | A | G | A | C | A | G  | T | T | C  | C | A | A | 80 |
| Rattus | G | A | G | A | G | A | G | C | T | A | T | T | G | A | T | G | C | T | T | C | T | T | G | C | A | A | A | A | G | G | A | C | A | T | C | T | T | G | C | A | C | C | T | T | G | T | T | G | C | A | C | T | T | C | C  | A | A | 80 |   |   |   |    |
| Cavia  | A | G | A | G | A | G | A | G | C | T | A | T | T | G | A | T | G | C | T | T | C | T | T | G | C | A | A | A | A | G | G | A | C | A | T | C | T | T | A | A | C | A | A | T | C | T | T | G | C | A | C | T | T | C | C  | A | A | 80 |   |   |   |    |
| Homo   | G | C | G | A | T | C | T | T | C | T | G | A | A | G | A | G | C | T | A | T | T | G | A | T | G | C | A | T | T | G | C | A | A | A | G | A | A | C | T | T | G | C | A | C | T | A | T | G | T | T | C | C | A | A | 80 |   |   |    |   |   |   |    |

  

|        |   |   |   |   |   |   |   |    |
|--------|---|---|---|---|---|---|---|----|
| Mus    | A | A | G | G | A | A | G | 87 |
| Rattus | A | A | G | G | A | A | G | 87 |
| Cavia  | A | A | G | G | A | A | G | 87 |
| Homo   | A | A | A | G | A | A | G | 87 |

ENSMUSG00000064158\_intron\_2

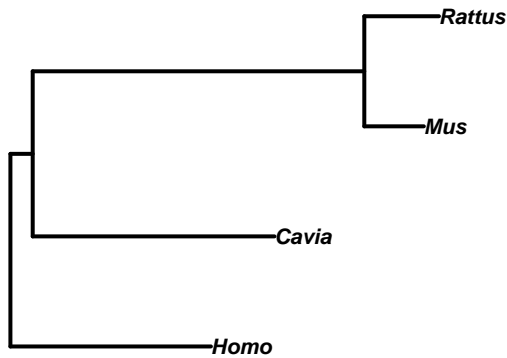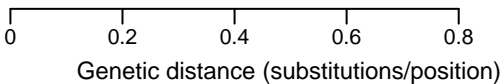

Mus 89  
Rattus 901  
Cavia 902  
Homo 101  
101  
101  
107  
197  
197  
209  
197  
301  
307  
313  
218  
410  
416  
422  
528  
498  
499  
443  
435  
577  
593  
443  
545  
684  
703  
457  
766  
784  
522  
674

ENSMUSG00000030703 intron 1

Description: Glycerophosphodiester phosphodiesterase domain-containing pr (Gdpd3)  
 Intron number: 1  
 Mouse chromosome: 7  
 Upstream exon length: 139  
 Downstream exon length: 43  
 Mouse intron length: 292  
 Intron alignment length: 411  
 Total murinae branch length: 0.14735  
 K\_score: 0.08684  
 Scaling factor: 0.57245

ENSMUSG00000030703 exon 1 (ORF 0)

|        |                                                                                   |    |
|--------|-----------------------------------------------------------------------------------|----|
| Mus    | ATGATCCCTCTCCTGTACTTTGTTCTGCCACCCCTGGGCAGTTACGTCATGCTCTCCATCTTCTTCCTGCGCCGACCTCA  | 80 |
| Rattus | ATGATCCCTCTCCTGTACTTTGTTCTGCCACCCCTGGGCAGCTATGTATTTCTCTCCATCTTCTTCCTGCGCCGACCTCA  | 80 |
| Cavia  | ATGATCCCTCTCCTGTACTATGCCCTGGCCTGCCCTGGGCAGCTATGTCATGCTCTCCATCTTCTTCCTGCGCCGACCTCA | 80 |
| Homo   | ATGATCCCTTTTGTGTACTATGCCCTGCCCTGGGCAGCTATGTCATGCTCTCCATCTTCTTCCTGCGCCGACCTCA      | 80 |

  

|        |                                                             |     |
|--------|-------------------------------------------------------------|-----|
| Mus    | TCTGCTGCACACGCCGGGGCTCCCGTCTTCCCTATCCGCCTGGCTGCCACCCGTGGA   | 139 |
| Rattus | CCTGCTGCACACACCCCTGGGCTCCAGGGTTCTGATCCGCCTGGCTGCCACCCGTGGA  | 139 |
| Cavia  | CCTGCTGCATACACCTTGGACTCCAGTCTTCCGTCCTCCGCCTGGCTGCCACCCGTGGA | 139 |
| Homo   | TCTGCTGCACACGCCCAAGGGCTCCACCTTCCGATCCGCCTGGCTGCCACCCGTGGA   | 139 |

ENSMUSG00000030703 exon 2 (ORF 2)

|        |                                             |    |
|--------|---------------------------------------------|----|
| Mus    | GGTCTGGGGAAGCACTGGAGAACACCATGGAAGCACTAGAGAA | 43 |
| Rattus | GGTCTGGGGAAGCACTGGAGAACACCATGGAAGCACTAGAGAA | 43 |
| Cavia  | GGTCTGGGGAAGCACTGGAGAACACCATGGAAGCACTAGAGAA | 43 |
| Homo   | GATCTGGAGAGCTGCTGGAGAACACCATGGAAGCACTAGAGAA | 43 |

ENSMUSG00000030703\_intron\_1

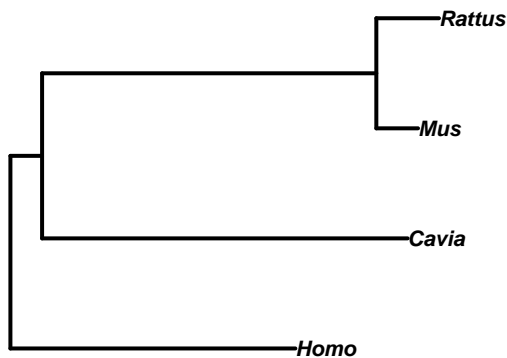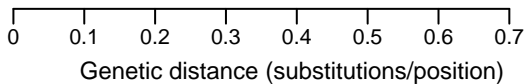

|        |                                                                                                                                                                                                                             |
|--------|-----------------------------------------------------------------------------------------------------------------------------------------------------------------------------------------------------------------------------|
| Mus    | G T G A G C T G A G T C A G G G A G G T G G A A - - G G G C T G G A A T C C A T G T A G G G T G G A G T G A G C C T A A C A G A C A G G T G T C A G G T G C - - G C A G C C A - - - - - T C C T C A A G C - 95              |
| Rattus | G T G A G C T G A A T C A G G G A T G T G G A A - - G G G A T G G A A T C C A T T T A G G A T A G A G T G A G C C A A A C A G A C A G G T G C C A T G G T G G C A G C A G C A C A - - - - - T T G T C A A G G - 98          |
| Cavia  | G T A A G C T G G C T A G A A G G A A G G G C A G G G T G G C A G C T C T T A G G A G T G G A G T G A G - - - - - G T C A A C G T G - - G C A G C A C T G A G G G T A G C T T C C A A G C - 82                              |
| Homo   | G T G A G C C G S T A G G G T G A - - - - - G A C A G G T G C A A A G T G G - - A C A G C A C A G A G G G T A G G T C A A G C C - 63                                                                                        |
| Mus    | T G C A A G C C A T G A T T G A A T G T T A A A - A A G A G C C - A G G A A A G G A C A G T C T T G G G C C T A G A G G G C A T G T G C A G G C A A G G A G A G G C C A G T T C A A C T G A T T G G A A G A G A G G A - 202 |
| Rattus | T G C A G C C C A G G A G T G A A T G T T A A A C C A A G A G C C - A G S T A A G G A G A C T G T G G G C A A G T G G A G G C C A T G T G A C - G A A G C A G A G G C C A G T T G C G T G A G T G G A A G A G A A S A - 205 |
| Cavia  | A G A A T C T A G A A G C A A G G C A G G A C C A A G T A G A G A G C A G G C A A C C A - - - - - G G A A G A C T A G G A A G A A A C C T G T C H A G T G A A T T G C C - - A A G A T A - 190                               |
| Homo   | G C C A T G C T A G A A A C G G G C A G G G A C C A A G A G A G A A G G A G A G C G A A G T G C A G G C C A G G T C T C A C A G A A A G A T C C T G C C C A G C C T G G G C T G G C T G G G A G T G A - 173                 |
| Mus    | A G C C T A A A - - - - - C C A A G T G G G A G C C G T - - - - - C A G G A - 231                                                                                                                                           |
| Rattus | A G C C T A A A - - - - - G C A A G C A G A T G A C C A T - - - - - C A G G A - 234                                                                                                                                         |
| Cavia  | G G C C T G G G G C T G G G G A T T A G C T C A G C G G C A T A A G C A C C T G C C T T G C A A G C A G C C G T C G T G A G T T C G A T C C C G G T A C G G A T A A A A G G T T A A A A A G T T A A A A A C A A A - 300     |
| Homo   | G G C C A G A G - - - - - G G A G A T G G A G C C A - - - - - C A G A - 200                                                                                                                                                 |
| Mus    | A G A A A G G T A A G C A G G A A G G T C A A G C T A G G T C C C G G G C A T C C A - - - - - C C C A A - - - - - A C T G C T T T C C A C A G - 292                                                                         |
| Rattus | A G A A A G G T A G G C A G G A A G G T C A A G C A G G T C C C A G G A T C C C A - - - - - C C C A A - - - - - A C T G C T T T C C A C A G - 295                                                                           |
| Cavia  | A G A A A G T T A G G C C T A A G S C C G A G A C A G C C A A G G G G G G T A G G T A T A A C A G A G A T G C C G A G T G G C C C A C A G - 381                                                                             |
| Homo   | G G A A T G T G G T G A T G A G G T G G C C A G G C C C A G A C C C A - - - - - A G C C C A G A G G C C A T C C A G T G G C C C C A C A G - 275                                                                             |

ENSMUSG00000025733 intron 5

Description: Mitochondrial Rho GTPase 2 (Rhot2)

Intron number: 5

Mouse chromosome: 17

Upstream exon length: 54

Downstream exon length: 53

Mouse intron length: 688

Intron alignment length: 966

Total murinae branch length: 0.27959

K\_score: 0.08942

Scaling factor: 0.57345

ENSMUSG00000025733 exon 5 (ORF 0)

|        |                                                         |    |
|--------|---------------------------------------------------------|----|
| Mus    | GCAAATGTAGTGTGTGTGGTGTACGATGTGTCTGAGGAGACCACCATTGAGAAAG | 54 |
| Rattus | GCAAATGTGGTGTGTGGTGTACGATGTGTCTGAGGAGACCACCATTGAGAAAG   | 54 |
| Cavia  | GCAAATGTGGTGTGTGGTGTATGATGTCTGAGGAGACCACCATTGAGAAAG     | 54 |
| Homo   | GCAAATGTGGTGTGTGGTGTATGATGTCTGAGGAGACCACCATTGAGAAAG     | 54 |

ENSMUSG00000025733 exon 6 (ORF 0)

|        |                                                      |    |
|--------|------------------------------------------------------|----|
| Mus    | ATCCGAACCAAGTGGATCCCTTGTGAATGGCAGGACGGCCACAGGGGCCAG  | 53 |
| Rattus | ATCCGAACCAAGTGGATCCCTTGTGAATGGCAGGACGGCCACAGGGGCCAG  | 53 |
| Cavia  | ATCCGAACCAAGTGGATCCCACTGGTGAATGGCAGACTGGAAAGTGGGCCAG | 53 |
| Homo   | ATTCGAACCTAAGTGGATCCCACTGGTGAATGGGGGACACGCAAGGGGCCAG | 53 |

ENSMUSG00000025733\_intron\_5

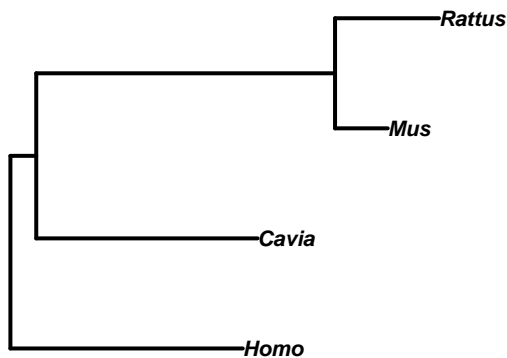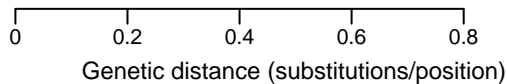

Mus G T A A G C A A G A G G G G A T C T C C T . . . . T G C C A T T T G T G T G T G T T T A A G A C T C A T T T G A G C C G G G C G T G G T G G C A C A C G C C T T A C T C C C A G C A C T T G G G A G G C 106  
Rattus G T A A A C G A G A G G G A G C T C C T C T C C G T T T T T T T T T T T T G T T T G T T T T . . . . . 52  
Cavia G T C A G C A G T G G G G G T T C C C A T C T G T C C C A G G T G C C A T T G T T T . . . . . 45  
Homo G T G A G C . . . . . 6

Mus A T A T G C A G G C G G A T T T C T G A G T T C G A G G A C A G C C T G A G T T C C A G G A C A G C C A G G G G T A C A C A G A G A A A C C C T G T C T C A A A A A A A A A A A A A A A A C C A A A A A A G A A A A 216  
Rattus . . . . . 52  
Cavia . . . . . 45  
Homo . . . . . 6

Mus A A A A G C T C A T T T G T T T A T A T G A A T A C A T T T A G C T G T C T T C A G A C A C C A G A A G A G G T C C T C A G A T G G T T G T G A G C C A C C A T G T G G T T C T G G G A T T G A A C T C A G A A C C 326  
Rattus . . . . . 326  
Cavia . . . . . 45  
Homo . . . . . 6

Mus T C T G C A G A G C A G T C A G T G C T T A A C C A C T G A G C T A T C T C T A G C C C T C C T T G T C . . . . . C T A G T G C C T G C C T T A G T T G G A G T T G G C C T G G A C 417  
Rattus T T G C G G T T C C T A G G C A A G G C T C T A C C A C T G A G C T A A T C C C C A A C C C C C C T C T C C G G T T T T A A C C C C T G C T G C T A G T G C C T G A C T T A T T G G G G G T T G C C T G G C 201  
Cavia . . . . . G A G A C C C A G A T 39  
Homo . . . . . C C T C A G T 25

Mus A G T . . . . . A C A C A G T G G C T C T T G A T G C T C A G C C T T T C T C T A A C C C T A G C . . . . . G I C T G T T G A G C C . . . . . T T C A G G A A C C 485  
Rattus A G T . . . . . A C A T A G T G G C T C T T G A T G C T C A A G C C T T A G C T A G C C T C C T . . . . . T T C T G T T G A G T C . . . . . T T T A G G G G A C 269  
Cavia G G C . . . . . A T A T A G T G A C C T T T G G T G C A A A T G G A T C C T T A C C C A C T T . . . . . T T A T G G T C A G T C C T G T A C T G T T G T C T A G G A T C 169  
Homo A G C A G A G A C A C A G T G G G C G G T G T G G C C A G G T G G A C C T T C A C C A A C C C G T G G C C A G T G C C A T C G C T C A C A G C A . . . . . T T T T G G G A G C C . . . . . T G A C T G G A T 123

Mus C C C A C A G C T C T G A G C T A G G A A G T G T T C C C C A T A C C A G C T T G C T T G G G A G A . . . . . 540  
Rattus C C T G T C C C T G A G C T A G G A A G T G T T C C C T T A C C C A G C T T G C T T G G A G A T T . . . . . 326  
Cavia C C C A T A C T T G A T T G A G G T C A G T C T T C T T G G A C C C T T A G C T C C A T A G A G A G G C T A B A A T G A C . . . . . C A A T C T A A A G C T T T A G A C . . . . . C T T G C C T G 261  
Homo T G C T G A C T G T G A C T C A C C C C C C C T C C T C T G T G A T C C C A C T T C C C T G A G A C G G T C T G G G C T G C C C C A T C T G A C C A T T G A C G G C G G G A G T C C T T T T C T T C C C A 233

Mus . . . . . A T C G G A C A A G T 551  
Rattus G C C C T A G A A T C T A T G G G G A A T G G G C A G A G G . . . . . T T T G C T T T G T G G T T G G A C C C C G T C T G T T T G T G G A G G G G T G T T C A C A G C C T T A G A C A G . . . . . 349  
Cavia G T T T C C A A A C C C C G G G G G G G A C C G A G A G G G C T G C C T T G G G C C G C C C T A G C C T T G G C C C A G T G A C T T G G G G T T T T G G A C C A T T G G G T C A G A C A G . . . . . 356  
Homo . . . . . 343

Mus . . . . . C C C T G T C T G G G T C T G A G T . . . . . C T C C C A C C A G C T T G C T C T . . . . . C C A . . . . . C T C T G A A A C C 303  
Rattus . . . . . C C C T G C T G T G A C T G C A G T C C C C C C C C C C C C A G C T T T G C T C T . . . . . G C A . . . . . C T C G A A A G C C 403  
Cavia . . . . . C T C A T G T C C T G T G C T A T C T C C T T T T C T T C C A C C A G C T T T A T T C T A G T G G C T A T A C T T T G A T C A C C A C T T G G G T T C A G C C T T T T T C T . . . . . T C C T T G A C C 453  
Homo A G C T G A C C T C C T G C T G C T T . . . . . C T C C C A C C A G C T T T G T C T T G T G G C C G G A C T T G G C C C T C A G T T G G G C T T G A C C T C C C C T T C T G C T C T C C C A G C C 445

Mus T T G T G A G C C C C A G A A G A G A G C A T G G G C T G . G T G A G C A T G C C A T G C C T T G C T C T C G C C T C A C A C T T G G A C T T G T C T T T C A G 688  
Rattus T C G T T A G T T C C A G G T A G A G A G C A T G G G C T G . G T G A G C A C C T G C G T G T C T T G . . . . . G A C A C A T T T G G A C T T T G T C T T T C A G 487  
Cavia T C T T G A A C C T C A G G C A G A C C G T G G G C G A G T A G A A G C C T T G T G T C A . . . . . T T T A C C T T T C A G 516  
Homo A G C C T C A T G C T C A G C T G G A G C C A T G T G C C . . . . . G G G G C A G C C T C A C . . . . . T T C A C A G C C A G C C T T C T T T C A G 516







ENSMUSG00000026281 intron 1

Description: Thymidylate kinase (Dtymk)

Intron number: 1

Mouse chromosome: 1

Upstream exon length: 130

Downstream exon length: 109

Mouse intron length: 787

Intron alignment length: 1273

Total murinae branch length: 0.17899

K\_score: 0.08402

Scaling factor: 0.58328

ENSMUSG00000026281 exon 1 (ORF 0)

|        |                                                                               |    |
|--------|-------------------------------------------------------------------------------|----|
| Mus    | ATGGCGTCCGCTCCGGAGGGCTCATCGTCTGGAGGGTGTGGACCGTGTGGCAAGACCACGCAGTGCCTCAAGCTGGT | 30 |
| Rattus | ATGGCGTCCGCTCCGGGGGCTCATCGTCTGGAGGGTGTGGACCGTGTGGCAAGACCACGCAGTGCCTCAAGCTGGT  | 30 |
| Cavia  | ATGGCGTCCGCTCCGGGGGCTCATCGTCTGGAGGGTGTGGACCGTGTGGCAAGACCACGCAGTGCCTCAAGCTGGT  | 30 |
| Homo   | ATGGCGTCCGCTCCGGGGGCTCATCGTCTGGAGGGTGTGGACCGTGTGGCAAGACCACGCAGTGCCTCAAGCTGGT  | 30 |

  

|        |                                                    |     |
|--------|----------------------------------------------------|-----|
| Mus    | GACCGCGCTGTGGCCCTCGGGCCACAGAGCGGAGCTGCTGCGTTTCCCTG | 130 |
| Rattus | GACCGCGCTGTGGCCCTCGGGCCACAGAGCGGAGCTGCTGCGTTTCCCTG | 130 |
| Cavia  | GTCCTGCTTGTGGCCCTCGGGCCACAGCGCGCAACTTCTGCGTTTCCCTG | 130 |
| Homo   | GGAAGCGCTGTGGCCCTCGGGCCACAGCGCGCAACTGCTGCGTTTCCCTG | 130 |

ENSMUSG00000026281 exon 2 (ORF 2)

|        |                                                                                     |    |
|--------|-------------------------------------------------------------------------------------|----|
| Mus    | AAAGATCAACGGAAATCGGCAAGCTTCTGAATTCCTACTTGGAAAAGAAAACGGAAGCTAGAGGATCACTCCGTGCACCTG   | 80 |
| Rattus | AAAGATCAACGAAATCGGCAAGCTTCTGAATTCCTACTTGGAAAAGAAAACGGAAGCTAGAGGATCACTCCGTGCACCTG    | 80 |
| Cavia  | ATCGATCAACGGAAATCGGCAAACTTCTTGTAGTCTTACTTGGAAAAGAAAAGTGAAGCTAGAGGATCACTCAAGTGCACCTA | 80 |
| Homo   | AAAGATCAACCTGAAATCGGCAAACTTCTGAGTCTTACTTGGAAAAGAAAAGTGAAGCTAGAGGATCACTCGGTGCACCTG   | 80 |

  

|        |                               |     |
|--------|-------------------------------|-----|
| Mus    | CTCTTCTCTGCAAAACCGTGGGAACAAGT | 109 |
| Rattus | CTCTTCTCTGCAAAACCGTGGGAACAAGT | 109 |
| Cavia  | CTTTTTTCTGCAAAACCGTGGGAACAAGT | 109 |
| Homo   | CTTTTTTCTGCAAAACCGTGGGAACAAGT | 109 |

ENSMUSG00000026281\_intron\_1

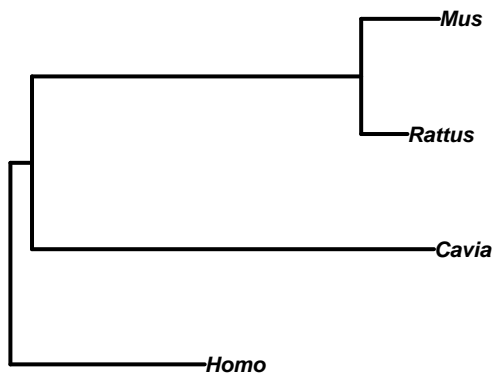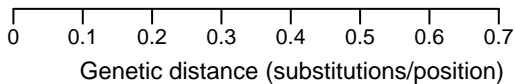

Mus 68  
Rattus 68  
Cavia 68  
Homo 68  
Mus 141  
Rattus 147  
Cavia 81  
Homo 208  
Mus 236  
Rattus 252  
Cavia 136  
Homo 270  
Mus 328  
Rattus 334  
Cavia 196  
Homo 343  
Mus 410  
Rattus 416  
Cavia 293  
Homo 419  
Mus 494  
Rattus 500  
Cavia 383  
Homo 491  
Mus 586  
Rattus 604  
Cavia 439  
Homo 555  
Mus 599  
Rattus 714  
Cavia 452  
Homo 568  
Mus 692  
Rattus 818  
Cavia 551  
Homo 677  
Mus 737  
Rattus 863  
Cavia 660  
Homo 719  
Mus 755  
Rattus 881  
Cavia 881  
Homo 770  
Mus 797  
Rattus 916  
Cavia 833  
Homo 776

ENSMUSG00000027217 intron 3

Description: Tetraspanin-18 (Tspan18)

Intron number: 3

Mouse chromosome: 2

Upstream exon length: 75

Downstream exon length: 99

Mouse intron length: 895

Intron alignment length: 1264

Total murinae branch length: 0.16449

K\_score: 0.06838

Scaling factor: 0.58936

ENSMUSG00000027217 exon 3 (ORF 0)

|        |                                                                              |    |
|--------|------------------------------------------------------------------------------|----|
| Mus    | TTCTTCCTGTTTATCCTGATCATCTTCCTGGTAGAGCTCTCAGCAGGCCATCCTGGCCTTCATCTTCAGAGAACAC | 75 |
| Rattus | TTTTTCCTGTTTATCCTGATCATCTTCCTGGTAGAGCTCTCAGCAGGCCATCCTGGCCTTCATCTTCAGGAAACAC | 75 |
| Cavia  | TTTTTCCTGTTTATCCTGATCATCTTCCTGGTAGAGCTCTCAGCAGGCCATCCTGGCCTTCATCTTCAGGAAACAC | 75 |
| Homo   | TTCTTCCTGTTTATCCTGATCATCTTCCTGGTAGAGCTCTCAGCAGGCCATCCTGGCCTTCATCTTCAGGAAAT   | 75 |

ENSMUSG00000027217 exon 4 (ORF 0)

|        |                                                  |                                   |    |
|--------|--------------------------------------------------|-----------------------------------|----|
| Mus    | CTCACCAGAGAGTTCTTCAACAAGGAGCTTACCAAGCACTACCAAGGC | GATAACGATACGGATGTTTTCTCTGCCACCTG  | 80 |
| Rattus | CTCACCAGAGAGTTCTTCAACAAGGAGCTTACCAAGCACTACCAAGGC | GATAAATGACACGGATGTTTTCTCTGCCACCTG | 80 |
| Cavia  | CTCACCAGAGAGTTCTTCAACAAGGAGCTTACCAAGCACTACCAAGGC | GATAACGACACGATGTTCTCTGCCACCTG     | 80 |
| Homo   | CTCACCAGAGATTCTTCAACAAGGAGCTTACCAAGCACTACCAAGGC  | AATAACGACACAGATGTTCTCTGCCACCTG    | 80 |

  

|        |                      |    |
|--------|----------------------|----|
| Mus    | GAATTCAGTCATGATCACAA | 99 |
| Rattus | GAATTCAGTCATGATCACAA | 99 |
| Cavia  | GAATTCAGTCATGATCACAA | 99 |
| Homo   | GAATTCAGTCATGATCACAA | 99 |

ENSMUSG00000027217\_intron\_3

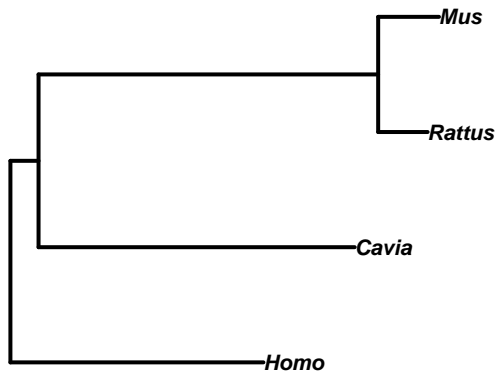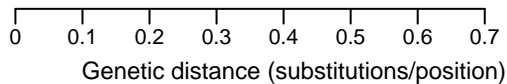

Mus 83  
Rattus 104  
Cavia 99  
Homo 103  
Mus 188  
Rattus 194  
Cavia 148  
Homo 194  
Mus 291  
Rattus 285  
Cavia 233  
Homo 298  
Mus 382  
Rattus 382  
Cavia 342  
Homo 382  
Mus 447  
Rattus 453  
Cavia 394  
Homo 488  
Mus 533  
Rattus 450  
Cavia 598  
Homo 598  
Mus 613  
Rattus 469  
Cavia 708  
Homo 708  
Mus 614  
Rattus 633  
Cavia 469  
Homo 818  
Mus 715  
Rattus 727  
Cavia 514  
Homo 927  
Mus 824  
Rattus 822  
Cavia 609  
Homo 1007  
Mus 879  
Rattus 876  
Cavia 864  
Homo 1115  
Mus 895  
Rattus 892  
Cavia 710  
Homo 1167

ENSMUSG00000022598 intron 2

Description: Prostate stem cell antigen Precursor (Psc)

Intron number: 2

Mouse chromosome: 15

Upstream exon length: 108

Downstream exon length: 212

Mouse intron length: 257

Intron alignment length: 506

Total murinae branch length: 0.24668

K\_score: 0.04827

Scaling factor: 0.58956

ENSMUSG00000022598 exon 2 (ORF 2)

|        |     |                                                                                  |    |
|--------|-----|----------------------------------------------------------------------------------|----|
| Mus    | --- | GTGCTGCTCTGCACTGCTATTTCATGCACAGCACACATGAACAACAGAGACTGTCTGAATGTACAGAAGCTGCAAGCCTG | 77 |
| Rattus | --- | GTGCTGCTCTGCACTGCTATTTCATGCACAGCACACATGAACAACAGAGACTGTCTGAATGTACAGAAGCTGCAAGCCTG | 77 |
| Cavia  | CAG | GTGCTGCTCTGCACTGCTATTTCATGCACAGCACACATGAACAACAGAGACTGTCTGAATGTACAGAAGCTGCAAGCCTG | 80 |
| Homo   | --- | GCACTGGCTGCTGTGCTACTTCTTGCATAGGCGCAGGTGAGCAACGAGGACTGGCTGCAAGTGGAGAAGCTGCAAGCCTG | 77 |

  

|        |               |                     |     |
|--------|---------------|---------------------|-----|
| Mus    | GACCAGCACAGT  | GCTTACATCGCGCATCC   | 108 |
| Rattus | GACCAGAACAGCT | GTTTACATCTCGTGTCC   | 108 |
| Cavia  | ACGGACACCTACT | GCTTACATCGCTGTCC    | 111 |
| Homo   | CTGGGGGAGCA   | GTGCTGGACCGCGGCATCC | 108 |

ENSMUSG00000022598 exon 3 (ORF 2)

|        |              |                                                                        |    |
|--------|--------------|------------------------------------------------------------------------|----|
| Mus    | GGCCATTGGA   | CTGTGACAGTTATCAGTAAGGGCTGCAGCTCAGAGTGTGAGGATGACTCGGAGAACTACTATTTGGG    | 80 |
| Rattus | GGACCATGGACT | CCTGACATTTATCAGTAAGGGCTGCAGCTCAAAGTGTGAGGATGACTCGGAGAACTACTATTTGGG     | 80 |
| Cavia  | GTGCCATCGGG  | GCTCCTGAGATTATCAGCAAGGGTTGCAGCTCTGATTGTGTTGGATGACTCAGAGAACTACTACTTTGGG | 80 |
| Homo   | GCGAGTTGG    | CTCCTGAGCGTTATCAGCAAGGGCTGCAGCTTGAAGTGGCTGGATGACTCAGAGAACTACTACTTTGGG  | 80 |

  

|        |                |                                                                  |     |
|--------|----------------|------------------------------------------------------------------|-----|
| Mus    | AAGAAGAACATCAC | GTGCTGCTACTCTGACCTGTGCAATGTCAACGGGGGCCACACCCTGAAGCCA             | 157 |
| Rattus | AAGAAGAAATAT   | CATGCTGCTACTCTGACCTGTGCAATGTCAACGGGGGCCACACCCTGAAGCCA            | 157 |
| Cavia  | AAGAATAACATCA  | CTGCTGCTACTCTGACCTGTGCAATGTCAACGGGGGCCATAGCCCTGAAGCCA            | 157 |
| Homo   | AAGAAGAACATCA  | CGTGTGACACCGAGCTTGTGCAATGTCAACGGGGGCCATGCCCTGAGCCGGCTGCTGCCATCCT | 160 |

ENSMUSG00000022598\_intron\_2

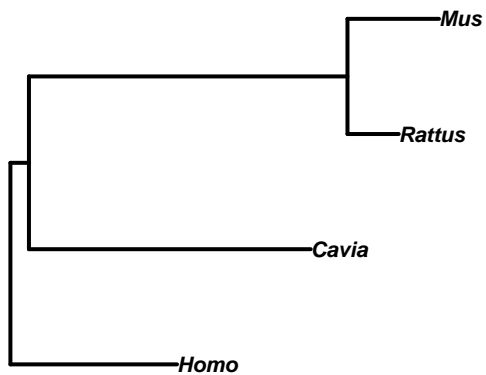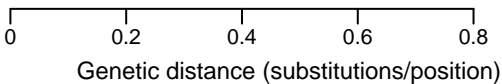









ENSMUSG00000027332 intron 8

Description: Isovaleryl-CoA dehydrogenase, mitochondrial Precursor (Ivd)  
 Intron number: 8  
 Mouse chromosome: 2  
 Upstream exon length: 94  
 Downstream exon length: 82  
 Mouse intron length: 478  
 Intron alignment length: 818  
 Total murinae branch length: 0.15541  
 K\_score: 0.07661  
 Scaling factor: 0.6038

ENSMUSG00000027332 exon 8 (ORF 2)

|        |                                                                                           |    |
|--------|-------------------------------------------------------------------------------------------|----|
| Mus    | <b>CGGCTAACGTCCTGAGGCCAGGAGACTAAGGGGGTCTACGTATTGATGAGCGGGCTGGACCTAGAGCGCCTGGTGGTACCA</b>  | 80 |
| Rattus | <b>CTGCTAACATCCTGAGGCCAAGAGACTAAGGGGTCTACGTACTGATGAGCGGGCTGGACCTAGAGACGCCTGGTGGTGGCA</b>  | 80 |
| Cavia  | <b>CTGCCAACATCCTGAGGCCAAGAGACTAAGGGGTCTACGTACTGATGAGCGGGCTGGACCTAGAGACGCCTGGTGGTGGCA</b>  | 80 |
| Homo   | <b>CTGCTAACATCCTGAGGCCATTGAGACTAAGGGGTCTACGTGCTGATGAGTGGGCTGGACCTGAGAGCGGCTGGTGGTGGCC</b> | 80 |

  

|        |                        |    |
|--------|------------------------|----|
| Mus    | <b>GGTGGGCCCCCTTGG</b> | 94 |
| Rattus | <b>GGTGGACCCCTTGG</b>  | 94 |
| Cavia  | <b>GGTGGGCCCCCTTGG</b> | 94 |
| Homo   | <b>GGGGGGCCTCTTGG</b>  | 94 |

ENSMUSG00000027332 exon 9 (ORF 1)

|        |                                                                                        |    |
|--------|----------------------------------------------------------------------------------------|----|
| Mus    | <b>GATCATGCAAGGCTGTCCTGGACCACACCATTCCTACTTGCATGTGAGGGAAGCCTTTGGCCAGAAGATCGGCCAATTC</b> | 80 |
| Rattus | <b>GATCATGCAAGGCTGTCCTGGACCACACCATTCCTACTTGCATGTGAGGGAAGCCTTTGGCCAGAAGATCGGCCAATTC</b> | 80 |
| Cavia  | <b>GTTGATGCAAGGCCTCTTGAACACACCATTCCTTACTGCAATGAGGGAAGCCTTTGGCCAGAAGATCGGCCAATTC</b>    | 80 |
| Homo   | <b>GCTCATGCAAGCGTCTCTGGACCACACCATTCCTACTGCACTGAGGGAAGCCTTTGGCCAGAAGATCGGCCAATTC</b>    | 80 |

  

|        |           |    |
|--------|-----------|----|
| Mus    | <b>AG</b> | 82 |
| Rattus | <b>AG</b> | 82 |
| Cavia  | <b>AG</b> | 82 |
| Homo   | <b>AG</b> | 82 |

ENSMUSG00000027332\_intron\_8

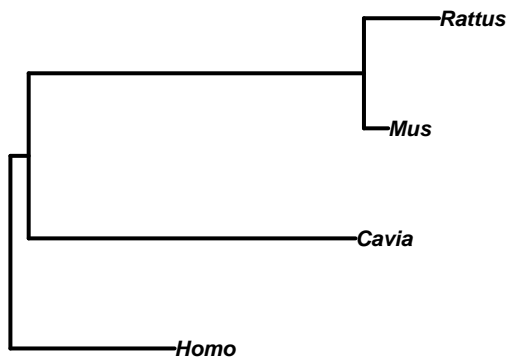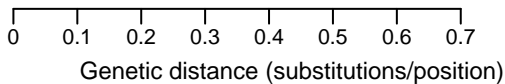

Mus Rattus Cavia Homo  
GTAAGTGTAAAG - GGCCTGAA - - - - - GGCTCCTGGGTAAAGCACAACATGTCACCAGGATCGGGCTGGG - GGTACCTGAGATCTCCAGCCCTCGTTAG 92  
GTAAGTGTAAAG - GGCCTGAA - - - - - GGCTCCTGGGTAAAGCACAACATGTCACCAGGATCGGGCTGGGAGT - GGTACCTGAGATCTCCAGCTCTTTAA 94  
GTAAGTGTAAAG - GGCCTGAA - - - - - GGCTCCTGGGTAAAGCACAACATGTCACCAGGATCGGGCTGGGAGT - GGTACCTGAGATCTCCAGCTCTTTAA 91  
GTAAGTGTAAAG - GGCCTGAA - - - - - GGCTCCTGGGTAAAGCACAACATGTCACCAGGATCGGGCTGGGAGT - GGTACCTGAGATCTCCAGCTCTTTAA 98

Mus Rattus Cavia Homo  
GTTAGCAGCTTTCACCTCGTTATGCAACA - - - - - AAGAGACAGGAAAGTTACT - - - - - TCTGTCTTGGAGA - - - - - ATCTCTCTCTACA 165  
GTTAGCAGCTTTCACCTCGTTATGCAACA - - - - - AAGAGACAGGAAAGTTACT - - - - - TCTGTCTTGGAGA - - - - - ATCTCTCTCTACA 179  
GTTAGCAGCTTTCACCTCGTTATGCAACA - - - - - AAGAGACAGGAAAGTTACT - - - - - TCTGTCTTGGAGA - - - - - ATCTCTCTCTACA 191  
GTTAGCAGCTTTCACCTCGTTATGCAACA - - - - - AAGAGACAGGAAAGTTACT - - - - - TCTGTCTTGGAGA - - - - - ATCTCTCTCTACA 156

Mus Rattus Cavia Homo  
TTTAA - - - - - CTCTTTACCCAGAAGGAAATGATGAGGTGACAGATGCAGG - - - - - GCTCTTTAATCACTGTGTTGTAAACCCAGAGCCCA 254  
TTTAA - - - - - CTCTTTACCCAGAAGGAAATGATGAGGTGACAGATGCAGG - - - - - GCTCTTTAATCACTGTGTTGTAAACCCAGAGCCCA 289  
TTTAA - - - - - CTCTTTACCCAGAAGGAAATGATGAGGTGACAGATGCAGG - - - - - GCTCTTTAATCACTGTGTTGTAAACCCAGAGCCCA 280  
TTTAA - - - - - CTCTTTACCCAGAAGGAAATGATGAGGTGACAGATGCAGG - - - - - GCTCTTTAATCACTGTGTTGTAAACCCAGAGCCCA 251

Mus Rattus Cavia Homo  
CTCTGCGCGCTGCCCACTGCCGCTGCCCGCCACACCTTCTTGATCTCAG - - - - - 304  
CTCTGCGCGCTGCCCACTGCCGCTGCCCGCCACACCTTCTTGATCTCAG - - - - - 332  
CTCTGCGCGCTGCCCACTGCCGCTGCCCGCCACACCTTCTTGATCTCAG - - - - - 390  
CTCTGCGCGCTGCCCACTGCCGCTGCCCGCCACACCTTCTTGATCTCAG - - - - - 269

Mus Rattus Cavia Homo  
AGGATCGTTGCGAGTTGGAGACCAGCCTGGGCTAAAAAGTGAGCTCAAGGCCAGCCTGAACTGCATAGAGAGACCCTGTCTCAAAAAAGACAAAAAAGCAAGCAGGGCG 500  
AGGATCGTTGCGAGTTGGAGACCAGCCTGGGCTAAAAAGTGAGCTCAAGGCCAGCCTGAACTGCATAGAGAGACCCTGTCTCAAAAAAGACAAAAAAGCAAGCAGGGCG 269

Mus Rattus Cavia Homo  
TCTGTAGTTGATCCCTAGTACCGATAAAAAAGAAAAAGACAAAAAAGACAAAAAAGAAAAAGCAGGCACAGTTCTGGGCTCCGCTCTGCTGGCAGGCA 610  
TCTGTAGTTGATCCCTAGTACCGATAAAAAAGAAAAAGACAAAAAAGACAAAAAAGAAAAAGCAGGCACAGTTCTGGGCTCCGCTCTGCTGGCAGGCA 601

Mus Rattus Cavia Homo  
GTT - - - - - CTCTCAGGCTCCTTTAGCTTTTCT - - - - - CTGGGATTCAGTTG - - - - - CCACTCAAGCCTGGGCTCCGATGCTGACATACC - - - - - 430  
GTT - - - - - CTCTCAGGCTCCTTTAGCTTTTCT - - - - - CTGGGATTCAGTTG - - - - - CCACTCAAGCCTGGGCTCCGATGCTGACATACC - - - - - 467  
GTT - - - - - CTCTCAGGCTCCTTTAGCTTTTCT - - - - - CTGGGATTCAGTTG - - - - - CCACTCAAGCCTGGGCTCCGATGCTGACATACC - - - - - 716  
GTT - - - - - CTCTCAGGCTCCTTTAGCTTTTCT - - - - - CTGGGATTCAGTTG - - - - - CCACTCAAGCCTGGGCTCCGATGCTGACATACC - - - - - 379

Mus Rattus Cavia Homo  
ATCCCCACTTGAACACAACACTCCACAGGCTTCTCTCTTTCTGGCAG 478  
ATCCCCACTTGAACACAACACTCCACAGGCTTCTCTCTTTCTGGCAG 514  
ATCCCCACTTGAACACAACACTCCACAGGCTTCTCTCTTTCTGGCAG 737  
ATCCCCACTTGAACACAACACTCCACAGGCTTCTCTCTTTCTGGCAG 418

ENSMUSG00000041945 intron 2

Description: Major facilitator superfamily domain-containing protein 9 (Mfsd9)  
 Intron number: 2  
 Mouse chromosome: 1  
 Upstream exon length: 88  
 Downstream exon length: 44  
 Mouse intron length: 1319  
 Intron alignment length: 1526  
 Total murinae branch length: 0.26634  
 K\_score: 0.03286  
 Scaling factor: 0.60485

ENSMUSG00000041945 exon 2 (ORF 0)

|        |                            |                               |                                  |    |
|--------|----------------------------|-------------------------------|----------------------------------|----|
| Mus    | GACCTGTTTGGTGTGTCAGCATGGT  | GCTCCCATTTGCTGAATCTTTCATGTCA  | GATCCCTGGGAGCAAGTCCCGTAGTGGCTGG  | 80 |
| Rattus | GATTCGTTTGGTGTGTCAGCATCACT | GCTCCCATTTGTTGAATCTTTCATGTCA  | GATCCCTTGGAGTAAAGTCCCGTAGTGGCTGG | 80 |
| Cavia  | GATTTGCTTGGGCTGTCAGCATGGT  | CATCCCGTTGTTGAGCCCTTTCAGCCCAA | GTCACTTGGAGCAAGTCCGTAAGTGGCTGG   | 80 |
| Homo   | GATTTGTTTGGTGTGTCAGCATGGT  | GCTTATTGAGCCCTTTCAGCCCAA      | GTCACTTGGAGCAAGTCCGTAAGTGGCTGG   | 80 |

  

|        |          |    |
|--------|----------|----|
| Mus    | AATAGTAG | 88 |
| Rattus | AATAGTAG | 88 |
| Cavia  | GATCATCG | 88 |
| Homo   | AATAGTAG | 88 |

ENSMUSG00000041945 exon 3 (ORF 2)

|        |                                              |    |
|--------|----------------------------------------------|----|
| Mus    | GCTCCTCATACGGCGTTTTGCAACTCTTCTCCAGCACCTTTGTG | 44 |
| Rattus | GCTCCTCCTATGGCATTGCAACTCTTCTCCAGCACCTTTGTG   | 44 |
| Cavia  | GTTCCCTCCTACGGAAATTTGCAACTCTTCTCCAGCACGCTGTG | 44 |
| Homo   | GCTCCTCCTATGGCATTGCAACTCTTCTTAGCACATTGTTG    | 44 |

ENSMUSG00000041945\_intron\_2

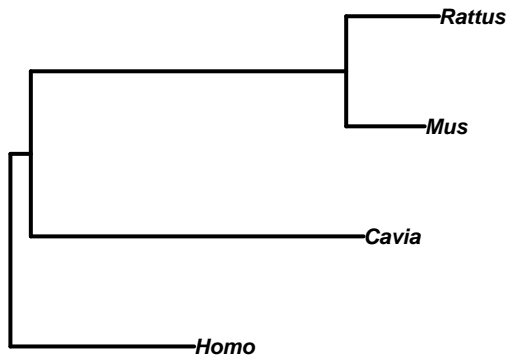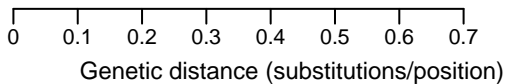



ENSMUSG00000029408 intron 2

Description: ATP-binding cassette sub-family B member 9 Precursor (Abcb9)  
 Intron number: 2  
 Mouse chromosome: 5  
 Upstream exon length: 115  
 Downstream exon length: 131  
 Mouse intron length: 423  
 Intron alignment length: 548  
 Total murinae branch length: 0.11990  
 K\_score: 0.08984  
 Scaling factor: 0.60705

ENSMUSG00000029408 exon 2 (ORF 2)

|        |                                                                                       |    |
|--------|---------------------------------------------------------------------------------------|----|
| Mus    | GTGAGACCTTCCCTGCCCTACTACACTGGCCGGGGCCATTGACAGCATTGTGATCCAGAAAAAGCATGGATCAGTTCAACCAACA | 80 |
| Rattus | GAGAGACCTTCCCTGCCCTACTACACTGGCCGGGGCCATTGACAGCATTGTGATCCAGAAAAAGCATGGATCAGTTCAACCAACA | 80 |
| Cavia  | GAGAGACCTTCCCTGCCCTACTACACTGGCCGGGGCCATTGACAGCATTGTGATCCAGAAAAAGCATGGATCAGTTCAACCAACA | 80 |
| Homo   | GAGAGACCTTCCCTGCCCTACTACACTGGCCGGGGCCATTGACAGCATTGTGATCCAGAAAAAGCATGGATCAGTTCAACCAACA | 80 |

  

|        |                                      |     |
|--------|--------------------------------------|-----|
| Mus    | GCCGTTGTCTGTCGTTTGCCTGCTGGCCATCGGCAG | 115 |
| Rattus | GCCGTCGTCTGTCGTTTGCCTGCTGGCCATCGGCAG | 115 |
| Cavia  | GCCGTTGTCTGTCGTTTGCCTGCTGGCCATCGGCAG | 115 |
| Homo   | GCTGTCTGTCATCGTGTGCCTGCTGGCCATCGGCAG | 115 |

ENSMUSG00000029408 exon 3 (ORF 1)

|        |                                                                                   |    |
|--------|-----------------------------------------------------------------------------------|----|
| Mus    | CTCATTGGCCGCAGGTATTCGGGGCGGATATTTTACCCCTCATATTTGCCAGACTGAACATTCGCCTTCGCAACTGTCTCT | 80 |
| Rattus | CTCATTGGCCGCAGGTATTCGGGGCGGATATTTTACCCCTCATATTTGCCAGACTGAACATTCGCCTTCGCAACTGTCTCT | 80 |
| Cavia  | CTCATTGGCCGCAGGTATTCGGGGCGGATATTTTACCCCTCATATTTGCCAGACTGAACATTCGCCTTCGCAACTGTCTCT | 80 |
| Homo   | CTCATTGGCCGCAGGTATTCGGGGCGGATATTTTACCCCTCATATTTGCCAGACTGAACATTCGCCTTCGCAACTGTCTCT | 80 |

  

|        |                                                      |     |
|--------|------------------------------------------------------|-----|
| Mus    | TCCGCTCACTGGTGTCCAGGAGACAAAGCTTCTTTGATGAGAACCAGCACAG | 131 |
| Rattus | TCCGCTCACTGGTGTCCAGGAGACAAAGCTTCTTTGATGAGAACCAGCACAG | 131 |
| Cavia  | TCCGCTCACTGGTGTCCAGGAGACAAAGCTTCTTTGATGAGAACCAGCACAG | 131 |
| Homo   | TCCGCTCACTGGTGTCCAGGAGACAAAGCTTCTTTGATGAGAACCAGCACAG | 131 |

ENSMUSG00000029408\_intron\_2

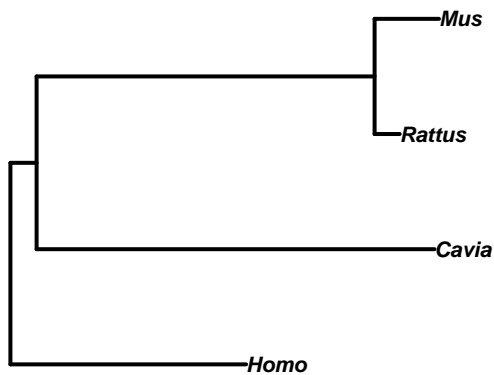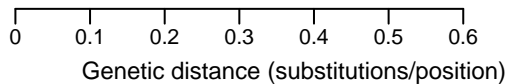

Mus GTAGCCA-CCCAACCCATACACACCACCT- ..... CCTGCAGGAGGGAGGGCAGAGGGAGCCAGGCGC- ..... 59  
Rattus GTAGCCA-CCCAACCCATACATGGCACT- ..... CCTGCAGGAGGGAGGGCAGGAGGGTGCAGGAC- ..... 59  
Cavia GTAGCCG- ..... CCTGCAGGAGGGAGGGCAGGAGGGTGCAGGAC- ..... 17  
Homo GTAGGTTGGCTCAACCCCCACAGCCCTGCCCCGGACACCCCGACCTGCAGCAGGGAGGGAGGGAGGGCGTTTCTTAAGGAAGACAGGGGCCAGGGAGGCCCTGGAAATGC 110

Mus ..... GAGCCCAAGCAGTGCAGCAACCG- ..... CCGAAGCTGAGCTGGAAACCCCTTTGGTTGGCCACATCCAGAGCTGTACCCCTTTGCTCTGAAAG 147  
Rattus ..... GAGCCCAAGCAGCGGGCAAGGT- ..... CCGAAGCTGAGCTGGAAAGCCCTTTGGTTGGCCACATCCAGAGCTGTACCCCTTTGCTCTGAAAG 147  
Cavia ..... GAGCCCAAGCAGCTTCACTGACCGGTCTGAGCAAGCC- ..... TAGGACCTCATCCCTGAGCAGGGAGGCGACGCTCTAAATG 113  
Homo ..... GAGCCCAAGCAGCTTCACTGACCGGTCTGAGCAAGCC- ..... TAGGACCTCATCCCTGAGCAGGGAGGCGACGCTCTAAATG 204

Mus TGGCTCCAGTCCCTGAGAGTACCTTTCTCTCCCTGGCTGTTGGTGAATATGTAGCC- ..... CAAAGGATGGTTTTCTATACTGTTCTAGA- ..... AGGGT 242  
Rattus TGGCTCCAGTCCCTGAGAGTACCTTTCTCTCCCTGGCTGTTGGTGAATATGTAGCC- ..... CAAAGGATGGTTTTCTATACTGTTCTAGA- ..... AGGGT 219  
Cavia GAGGCTTCAGCCCTGAGGCTCCCTGCACTCTGCTGGCTGTTTTCCAGTATGAGATCTGGTCCCAAACAACAACCGGCTTTGTCTGAGCTGTCTCTGAGAGGAAAGAGGGT 159  
Homo GAGGCTTCAGTCCCTGAGGCTCCCTGCACTCTGCTGGCTGTTTTCCAGTATGAGATCTGGTCCCAAACAACAACCGGCTTTGTCTGAGCTGTCTCTGAGAGGAAAGAGGGT 314

Mus CTGGATCCCAAGTGTAAAGT- ..... CCTTACCCCTTGTCTAGGACTTACTGGGGAGTGAGGGGTCTAGCCGAGATGCATCCCTACAG 326  
Rattus CTGGATCCCAAGTGTAAAGT- ..... CCTTACCCCTTGTCTAGGACTTACTGGGGAGTGAGGGGTCTAGCCGAGATGCATCCCTACAG 281  
Cavia ..... CAGGCAAGCTGTCTGCTGTCCCA- ..... CCTTACCCCTTGTCTAGGAGGGGTCTAGCCGAGATGCATCCCTACAG 235  
Homo ..... CAGGCAAGCTGTCTGCTGTCCCA- ..... CCTTACCCCTTGTCTAGGAGGGGTCTAGCCGAGATGCATCCCTACAG 324

Mus AATGGCCCTGTCTCTGCTGCT- ..... TGGGAGGA- GGGGCTGCTGGTGGTCAATGCTGCTTGGCGAAGGACACCGGCTATAGCTCTCTGATCTCAATCAG 423  
Rattus AATGGCCCTGTCTCTGCTGCT- ..... TGGGAGGA- GGGGCTGCTGGTGGTCAATGCTGCTTGGCGAAGGACACCGGCTATAGCTCTCTGATCTCAATCAG 390  
Cavia TGGGA- ..... GAAAGGATGCAAGGGGAGGGGGTGGTGGCTGCCCTCTCTGAGAGCCGGGGCTATAACATCTGTTATCTGCAATTAG 319  
Homo TGGGGTGGGGTGGGCTCCAGGCCTGCCGCAAGCGGAGGGGCGAAGCGGCTGTGGTCACTGGTCTGAAAGACATGTGCTATAATATCTCTTATCTGCAATTAG 532

ENSMUSG00000039849 intron 7

Description: Phosphorylated CTD-interacting factor 1 (Pcif1)

Intron number: 7

Mouse chromosome: 2

Upstream exon length: 84

Downstream exon length: 100

Mouse intron length: 251

Intron alignment length: 299

Total murinae branch length: 0.28345

K\_score: 0.04691

Scaling factor: 0.61008

ENSMUSG00000039849 exon 7 (ORF 1)

|        |                                                           |                              |    |
|--------|-----------------------------------------------------------|------------------------------|----|
| Mus    | GTTATCCCGAATCAAGTTCGGGAGGAAGCCAAACGCCTGCTCTTTAAATA        | CCAGAGGCTGCCAGCGGGCTCATTGACT | 80 |
| Rattus | GTTATCCCGAATCAAGTTCGGGAGGAAGCCAAACGCCTGCTCTTTAAATA        | CCAGAGGCTGCCAGCGGGCTCATTGACT | 80 |
| Cavia  | ATTATCCCGAATCAAGTTCGGGAGGAAGCCAAAGCGCTGCCAGCGGGCTCATTGACT | CCAGAGGCTGCCAGCGGGCTCATTGACT | 80 |
| Homo   | GTTATCCCGAATCAAGTTCGGGAGGAAGCCAAAGCGCTGCCAGCGGGCTCATTGACT | CCAGAGGCTGCCAGCGGGCTCATTGACT | 80 |

  

|        |      |    |
|--------|------|----|
| Mus    | CCAG | 84 |
| Rattus | CCAG | 84 |
| Cavia  | CCAG | 84 |
| Homo   | CCAG | 84 |

ENSMUSG00000039849 exon 8 (ORF 1)

|        |                      |                     |                 |           |            |         |    |
|--------|----------------------|---------------------|-----------------|-----------|------------|---------|----|
| Mus    | GAGTGCATCCCCTGACAGCA | GAAAACTGGTCAAATGGAA | CGTGGAGGACACCTT | CAGCTGGCT | CCGGAAGGAG | CCACTCG | 80 |
| Rattus | GAGTGCATCCCCTGACAGCA | GAAAACTGGTCAAATGGAA | CGTGGAGGACACCTT | CAGCTGGCT | CCGGAAGGAG | CCACTCG | 80 |
| Cavia  | GAGTGCATCCCCTGACAGCA | GAAAACTGGTCAAATGGAA | CGTGGAGGACACCTT | CAGCTGGCT | CCGGAAGGAG | CCACTCG | 80 |
| Homo   | GAGTGCATCCCCTGACAGCA | GAAAACTGGTCAAATGGAA | CGTGGAGGACACCTT | CAGCTGGCT | CCGGAAGGAG | CCACTCG | 80 |

  

|        |                      |     |
|--------|----------------------|-----|
| Mus    | CCTCCAAGGAGGACTACATG | 100 |
| Rattus | CCTCCAAGGAGGACTACATG | 100 |
| Cavia  | CCTCCAAGGAGGACTACATG | 100 |
| Homo   | CCTCCAAGGAGGACTACATG | 100 |

ENSMUSG00000039849\_intron\_7

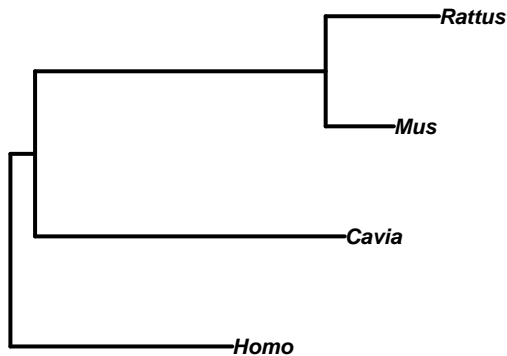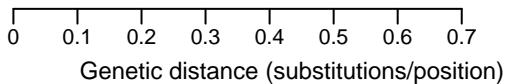

|        |          |                              |       |                                               |                    |                     |    |    |       |    |    |    |    |    |       |    |       |       |       |    |    |    |       |    |       |       |    |    |    |    |    |     |    |     |     |     |
|--------|----------|------------------------------|-------|-----------------------------------------------|--------------------|---------------------|----|----|-------|----|----|----|----|----|-------|----|-------|-------|-------|----|----|----|-------|----|-------|-------|----|----|----|----|----|-----|----|-----|-----|-----|
| Mus    | GTTTGGCT | TTTTCTGCCCCACACAATGAAATGGTGG | ----- | GTGGGATGTGTGTGTTCCACATGTATACATGAACATACACGCTGT | CATCTGGCTAAATGTCAC | 103                 |    |    |       |    |    |    |    |    |       |    |       |       |       |    |    |    |       |    |       |       |    |    |    |    |    |     |    |     |     |     |
| Rattus | GTTTGGCT | TTTTCTGCCCCACACAATGAAATGGTGT | ----- | GTGGGTGTGGTGTGGTGTGTGTGTGCTGGC                | -----              | CATTTCCTAATGCTCAC   |    |    |       |    |    |    |    |    |       |    |       |       |       |    |    |    |       |    |       |       |    |    |    |    |    |     |    |     |     |     |
| Cavia  | GTTTGGCT | TTTTCTGCCCCACACAATGAAATGGTGT | ----- | GTGGGATGTGTGGTGTGGTGTGTGTGCTGGC               | -----              | GGTTCCTTACCACCTG    |    |    |       |    |    |    |    |    |       |    |       |       |       |    |    |    |       |    |       |       |    |    |    |    |    |     |    |     |     |     |
| Homo   | GTTTGGCT | TTTTCTGCCCCACACAATGAAATGGTGT | ----- | GTGGGATGTGTGGTGTGGTGTGTGTGCTGGC               | -----              | CATTCTGGCCAGTGTCAAT |    |    |       |    |    |    |    |    |       |    |       |       |       |    |    |    |       |    |       |       |    |    |    |    |    |     |    |     |     |     |
| Mus    | GCA      | GT                           | TT    | GG                                            | CA                 | GT                  | TT | AT | CA    | AA | GA | CA | CA | AT | GG    | AG | TA    | AG    | ----- | GT | AG | GC | CT    | AG | CT    | GA    | CT | GG | CA | GT | GA | GC  | AG | GG  | AG  | 181 |
| Rattus | AC       | AG                           | GT    | CT                                            | CA                 | TT                  | GG | TT | ----- | AA | CA | CA | CA | AT | GG    | AG | TA    | AG    | ----- | TT | AG | GC | CT    | AG | CT    | GA    | CT | GG | CA | GT | GA | GC  | AG | GG  | AG  | 183 |
| Cavia  | AG       | CA                           | GT    | CT                                            | CA                 | TT                  | GG | TT | ----- | AA | CA | CA | CA | AT | GG    | AG | TA    | AG    | ----- | TT | AG | GC | CT    | AG | CT    | GA    | CT | GG | CA | GT | GA | GC  | AG | GG  | AG  | 185 |
| Homo   | GC       | AG                           | GT    | CT                                            | CA                 | TT                  | GG | TT | ----- | AA | CA | CA | CA | AT | GG    | AG | TA    | AG    | ----- | TT | AG | GC | CT    | AG | CT    | GA    | CT | GG | CA | GT | GA | GC  | AG | GG  | AG  | 187 |
| Mus    | GA       | GG                           | GA    | -----                                         | GC                 | AG                  | CA | AG | CA    | CA | CT | TA | AG | CT | GG    | CC | ----- | CA    | AG    | AG | CA | AG | TT    | CT | ----- | CT    | GC | TA | CA | AC | CT | GC  | AG | 251 |     |     |
| Rattus | CA       | AG                           | GA    | -----                                         | CA                 | AG                  | CA | CA | CT    | TA | AG | CT | GG | CC | ----- | CA | AG    | AG    | CA    | AG | TT | CT | ----- | CT | GC    | TA    | CA | AC | CT | GC | AG | 231 |    |     |     |     |
| Cavia  | GG       | AA                           | GA    | GG                                            | CT                 | GG                  | CA | AG | CA    | CA | CT | TA | AG | CT | GG    | CC | ----- | CA    | AG    | AG | CA | AG | TT    | CT | ----- | CT    | GC | TA | CA | AC | CT | GC  | AG | 236 |     |     |
| Homo   | T        | GA                           | GG    | GA                                            | GG                 | CT                  | GG | CA | AG    | CA | CA | CT | TA | AG | CT    | GG | CC    | ----- | CA    | AG | AG | CA | AG    | TT | CT    | ----- | CT | GC | TA | CA | AC | CT  | GC | AG  | 242 |     |



ENSMUSG00000006021 intron 9

Description: Kaptin (Kptn)  
 Intron number: 9  
 Mouse chromosome: 7  
 Upstream exon length: 76  
 Downstream exon length: 136  
 Mouse intron length: 920  
 Intron alignment length: 1532  
 Total murinae branch length: 0.18335  
 K\_score: 0.0796  
 Scaling factor: 0.61043

ENSMUSG00000006021 exon 9 (ORF 2)

|        |   |   |   |   |   |   |   |   |   |   |   |   |   |   |   |   |   |   |   |   |   |   |   |   |   |   |   |   |   |   |   |   |   |   |   |   |   |   |   |   |   |   |   |   |   |   |   |   |   |   |   |   |   |   |   |   |   |   |   |   |   |   |   |   |   |   |   |   |    |   |    |   |   |    |
|--------|---|---|---|---|---|---|---|---|---|---|---|---|---|---|---|---|---|---|---|---|---|---|---|---|---|---|---|---|---|---|---|---|---|---|---|---|---|---|---|---|---|---|---|---|---|---|---|---|---|---|---|---|---|---|---|---|---|---|---|---|---|---|---|---|---|---|---|---|----|---|----|---|---|----|
| Mus    | C | A | A | C | A | G | G | A | C | A | G | C | C | C | C | C | A | G | C | A | G | G | A | A | G | G | A | T | A | C | A | G | T | C | T | G | C | T | T | G | T | G | G | C | C | A | G | C | A | T | C | T | G | G | A | G | C | C | A | G | C | T | G | T | G | G | T | G | T  | A | C  | T | G | 76 |
| Rattus | C | A | A | C | A | G | G | A | C | A | G | C | C | C | C | C | A | G | C | A | G | G | A | A | G | G | A | T | A | C | A | G | T | C | T | G | C | T | T | G | T | G | G | C | C | A | G | C | A | T | C | T | G | G | A | G | C | C | A | G | C | T | G | T | G | T | A | C | T  | G | 76 |   |   |    |
| Cavia  | A | G | G | C | T | G | A | G | A | C | A | G | C | C | C | C | A | G | C | A | G | G | A | A | G | G | A | T | A | C | A | G | T | C | T | G | C | T | T | G | T | G | G | C | C | A | G | C | A | T | C | T | G | G | A | G | C | C | A | G | C | T | G | T | A | C | T | G | 76 |   |    |   |   |    |
| Homo   | A | G | A | C | C | A | G | G | A | C | A | G | C | C | C | C | A | G | C | A | G | G | A | A | G | G | A | T | A | C | A | G | T | C | T | G | C | T | T | G | T | G | G | C | C | A | G | C | A | T | C | T | G | G | A | G | C | C | A | G | C | T | G | T | A | C | T | G | 76 |   |    |   |   |    |

ENSMUSG00000006021 exon 10 (ORF 1)

|        |   |   |   |   |   |   |   |   |   |   |   |   |   |   |   |   |   |   |   |   |   |   |   |   |   |   |   |   |   |   |   |   |   |   |   |   |   |   |   |   |   |   |   |   |   |   |   |   |   |   |   |   |   |   |   |   |   |   |   |   |   |   |   |   |   |   |   |   |   |   |   |   |   |   |   |   |    |   |    |
|--------|---|---|---|---|---|---|---|---|---|---|---|---|---|---|---|---|---|---|---|---|---|---|---|---|---|---|---|---|---|---|---|---|---|---|---|---|---|---|---|---|---|---|---|---|---|---|---|---|---|---|---|---|---|---|---|---|---|---|---|---|---|---|---|---|---|---|---|---|---|---|---|---|---|---|---|---|----|---|----|
| Mus    | G | G | A | T | C | T | T | C | T | G | A | A | C | A | A | G | G | G | T | C | T | G | S | A | T | G | A | C | C | A | A | C | T | T | C | T | C | T | G | C | C | T | G | G | C | A | G | T | G | A | C | C | A | G | T | T | G | A | C | A | G | C | G | T | A | C | C | T | C | T | G | T | G | G | C | C | T  | G | 80 |
| Rattus | G | G | A | C | T | T | C | T | G | A | A | C | A | A | G | G | C | C | T | G | S | A | T | G | A | C | C | A | A | C | T | T | C | T | C | T | G | C | C | T | G | G | C | A | G | T | G | A | C | C | A | G | T | T | G | A | C | A | G | C | G | T | A | C | C | T | C | T | G | T | G | G | C | C | T | G | 80 |   |    |
| Cavia  | G | G | A | C | T | A | C | T | G | A | A | C | A | A | G | G | C | C | T | G | S | A | T | G | A | C | C | A | A | C | T | T | C | T | C | T | G | C | C | T | G | G | C | A | G | T | G | A | C | C | A | G | T | T | G | A | C | A | G | C | G | T | A | C | C | T | C | T | G | T | G | G | C | C | T | G | 80 |   |    |
| Homo   | G | G | A | C | T | G | C | T | G | A | A | C | A | A | G | G | C | C | T | G | S | A | T | G | A | C | C | A | A | C | T | T | C | T | C | T | G | C | C | T | G | G | C | A | G | T | G | A | C | C | A | G | T | T | G | A | C | A | G | C | G | T | A | C | C | T | C | T | G | T | G | G | C | C | T | G | 80 |   |    |

  

|        |   |   |   |   |   |   |   |   |   |   |   |   |   |   |   |   |   |   |   |   |   |   |   |   |   |   |   |   |   |   |   |   |   |   |   |   |   |   |   |     |
|--------|---|---|---|---|---|---|---|---|---|---|---|---|---|---|---|---|---|---|---|---|---|---|---|---|---|---|---|---|---|---|---|---|---|---|---|---|---|---|---|-----|
| Mus    | T | C | A | C | T | G | A | C | A | A | C | C | G | G | A | A | G | T | C | C | T | G | G | T | G | G | C | C | A | C | T | A | T | G | G | A | C | A | G | 136 |
| Rattus | T | C | A | C | T | G | A | C | A | A | C | C | G | G | A | A | G | T | C | C | T | G | G | T | G | G | C | C | A | C | T | A | T | G | G | A | C | A | G | 136 |
| Cavia  | T | C | A | C | T | G | A | C | A | A | C | C | G | G | A | A | G | T | C | C | T | G | G | T | G | G | C | C | A | C | T | A | T | G | G | A | C | A | G | 136 |
| Homo   | T | C | A | C | T | G | A | C | A | A | C | C | G | G | A | A | G | T | C | C | T | G | G | T | G | G | C | C | A | C | T | A | T | G | G | A | C | A | G | 136 |

ENSMUSG00000006021\_intron\_9

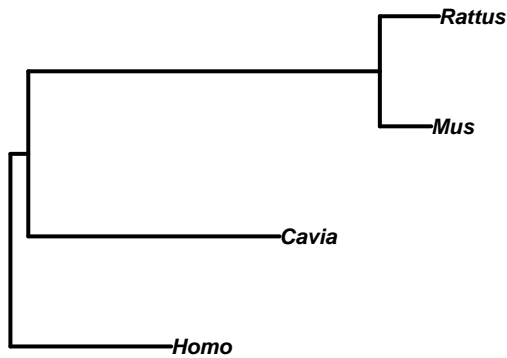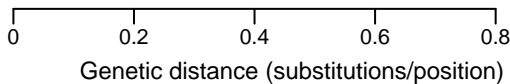







ENSMUSG00000037706 intron 5

Description: CD81 antigen (Cd81)  
 Intron number: 5  
 Mouse chromosome: 7  
 Upstream exon length: 105  
 Downstream exon length: 102  
 Mouse intron length: 308  
 Intron alignment length: 376  
 Total murinae branch length: 0.16972  
 K\_score: 0.06904  
 Scaling factor: 0.61246

ENSMUSG00000037706 exon 5 (ORF 0)

|        |   |   |   |   |   |   |   |   |   |   |   |   |   |   |   |   |   |   |   |   |   |   |   |   |   |   |   |   |   |   |   |   |   |   |   |   |   |   |   |   |   |   |   |   |   |   |   |   |   |   |   |   |   |   |   |   |   |   |   |   |   |   |   |   |   |   |   |   |   |   |   |   |   |   |   |   |    |
|--------|---|---|---|---|---|---|---|---|---|---|---|---|---|---|---|---|---|---|---|---|---|---|---|---|---|---|---|---|---|---|---|---|---|---|---|---|---|---|---|---|---|---|---|---|---|---|---|---|---|---|---|---|---|---|---|---|---|---|---|---|---|---|---|---|---|---|---|---|---|---|---|---|---|---|---|---|----|
| Mus    | A | T | C | G | C | C | A | A | G | G | A | T | G | T | G | A | A | G | C | A | G | T | T | C | T | A | T | G | A | C | C | A | G | G | C | C | T | T | C | A | G | C | A | A | G | C | T | G | T | G | A | T | G | S | A | T | G | A | T | G | C | C | A | A | C | A | A | T | G | C | C | A | A | G | G | C | 80 |
| Rattus | A | T | C | G | C | C | A | A | G | G | A | T | G | T | G | A | A | G | C | A | G | T | T | C | T | A | T | G | A | C | C | A | G | G | C | C | T | T | C | A | G | C | A | A | G | C | T | G | T | G | A | T | G | S | A | T | G | A | T | G | C | C | A | A | C | A | A | T | G | C | C | A | A | G | G | C | 80 |
| Cavia  | A | T | C | G | C | C | A | A | G | G | A | T | G | T | G | A | A | G | C | A | G | T | T | C | T | A | T | G | A | C | C | A | G | G | C | C | T | T | C | A | G | C | A | A | G | C | T | G | T | G | A | T | G | S | A | T | G | A | T | G | C | C | A | A | C | A | A | T | G | C | C | A | A | G | G | C | 80 |
| Homo   | A | T | C | G | C | C | A | A | G | G | A | T | G | T | G | A | A | G | C | A | G | T | T | C | T | A | T | G | A | C | C | A | G | G | C | C | T | T | C | A | G | C | A | A | G | C | T | G | T | G | A | T | G | S | A | T | G | A | T | G | C | C | A | A | C | A | A | T | G | C | C | A | A | G | G | C | 80 |

  

|        |   |   |   |   |   |   |   |   |   |   |   |   |   |   |   |   |   |   |   |   |   |   |   |   |     |
|--------|---|---|---|---|---|---|---|---|---|---|---|---|---|---|---|---|---|---|---|---|---|---|---|---|-----|
| Mus    | T | G | T | G | G | T | G | A | A | G | A | C | T | T | C | C | A | T | G | A | G | A | C | G | 105 |
| Rattus | A | G | T | G | G | T | G | A | A | G | A | C | T | T | C | C | A | T | G | A | G | A | C | G | 105 |
| Cavia  | T | G | T | G | G | T | G | A | A | G | A | C | T | T | C | C | A | T | G | A | G | A | C | G | 105 |
| Homo   | T | G | T | G | G | T | G | A | A | G | A | C | T | T | C | C | A | T | G | A | G | A | C | G | 105 |

ENSMUSG00000037706 exon 6 (ORF 0)

|        |   |   |   |   |   |   |   |   |   |   |   |   |   |   |   |   |   |   |   |   |   |   |   |   |   |   |   |   |   |   |   |   |   |   |   |   |   |   |   |   |   |   |   |   |   |   |   |   |   |   |   |   |   |   |   |   |   |   |   |    |   |   |    |   |   |   |    |
|--------|---|---|---|---|---|---|---|---|---|---|---|---|---|---|---|---|---|---|---|---|---|---|---|---|---|---|---|---|---|---|---|---|---|---|---|---|---|---|---|---|---|---|---|---|---|---|---|---|---|---|---|---|---|---|---|---|---|---|---|----|---|---|----|---|---|---|----|
| Mus    | C | T | C | A | A | C | T | G | T | T | G | T | G | G | C | T | C | C | A | A | G | C | A | C | T | G | A | C | C | A | C | A | C | C | A | T | A | C | T | G | A | G | G | A | A | C | A | G | C | C | T | G | T | C | C | C | T | C | A | G  | G | C | G  | C | A | A | 80 |
| Rattus | C | T | C | A | A | C | T | G | T | T | G | T | G | G | C | T | C | C | A | A | T | A | C | G | T | G | A | C | C | A | C | C | G | T | G | C | T | G | A | G | G | A | A | C | A | G | C | C | T | G | T | C | C | C | T | C | A | A | G | C  | A | A | 80 |   |   |   |    |
| Cavia  | C | T | C | A | A | C | T | G | T | T | G | T | G | G | C | T | C | C | A | A | C | A | C | A | T | G | A | T | G | C | G | T | G | C | T | G | A | G | G | A | A | C | A | A | G | C | C | T | G | T | C | C | A | T | C | G | G | C | A | C  | G | C | 80 |   |   |   |    |
| Homo   | C | T | T | G | A | C | T | G | C | T | G | T | G | G | C | T | C | C | A | G | C | A | C | A | T | G | A | T | G | C | G | T | G | C | T | G | A | G | G | A | A | C | A | A | T | T | G | T | C | C | C | T | C | G | G | G | C | A | A | 80 |   |   |    |   |   |   |    |

  

|        |   |   |   |   |   |   |   |   |   |   |   |   |   |   |   |   |     |   |   |     |     |     |
|--------|---|---|---|---|---|---|---|---|---|---|---|---|---|---|---|---|-----|---|---|-----|-----|-----|
| Mus    | C | A | T | A | C | C | C | C | T | T | A | C | T | G | A | G | 102 |   |   |     |     |     |
| Rattus | C | T | C | A | T | T | C | A | C | T | C | M | G | C | T | T | G   | A | G | 102 |     |     |
| Cavia  | C | T | T | C | A | T | A | A | A | T | A | C | C | T | T | A | T   | G | A | G   | 102 |     |
| Homo   | C | A | T | C | A | T | C | A | G | C | A | A | C | T | T | C | T   | T | G | A   | G   | 102 |

ENSMUSG00000037706\_intron\_5

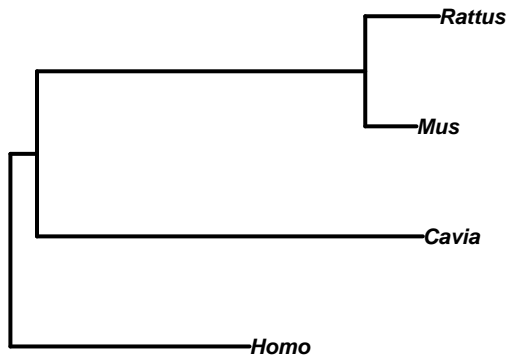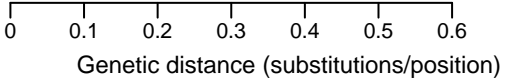

```

Mus      G T A T A G C - - - T A G G C T C A A G C A S - G A G G G A G G C T G T G G G T T C T A G T G T G A G G G C A T G G T C T C C T T T C - - - - - T T C C A A C A C A A C A S G G C C T A G G A A - - - 94
Rattus  G T A G A G D - - - T A A G C T G G A G C A G - G A G G G C A G G T T G T G G G - - - - - G T G T G T G G G G C A T G A G T G C C A G A T C - - - - - T C T - - - - - G T A A C A A G A C C T G G G A A - - - 82
Cavia   G T C T G C C T G G C T G G G C T A G G C A C A G G G A T G G C T A C A G A C C A G C T G G G T G G G T G T G C T C T T G G A G C A G T C C T G C C T C A G C C C A G A C C T C A G A T G T G 110
Homo    G T G C C G G - - - - - G C C G G G G G G A G G G G G G G G A G C A G G G C C C G G G A A C C C G G G G G T T G T G T G T G C T G T G G A T G A A T C C T G G C T A G G C C A G A C C T C A G A G C A G 102

Mus      - - - - - A G G T C T C C - - - - - T C T A T G A T T T G T G G T C C T C A G G T A G G A A T C T A A T G G G C C T C A T T T C C C A G G G T T T G A A G G A A C A G G C T G C T G T G C A 183
Rattus  - - - - - A G T T C T C C - - - - - T C T A T G A T T - - - - - A G A T G C C C A G S T A C C A A T C T A A T S G G C C T G G T T T C C G A G G G T T T G A A G G A A T G G A C T T G T S G C A 169
Cavia   T C T A T G T A G A G G G C T C C - - - - - T C T A T G A C T - - - - - T A G T T G T A G T G G A A C T G T T G A A C C T G C C A - - - - - C T G G C T T - - - - - G T C T G A G C A 189
Homo    G A G G T G C C C T T G G A C T C C A A G G A C C C T G G T C T C A A C T - - - - - G G T C C T G G G T G G A A C C T A C T G G G C C A G G C T G C C C A G G C T G C G S A A A G - - - - - C T C T G A G C A 200

Mus      G G T G A C A A A C A G G C C A G A A G - - - - - G A C A A C T C C A A G T G - - - - - T A T T T T G G G T G A C G G T G T G C T G T G T G C C - - - - - T G A T C T T T C C C T T - - - - - G 262
Rattus  G G T G A C A A A C A G G C C A G A A G A C A - - - - - G A C A G C T C C A A G T G T A T A T T T T G G G T A T G C T G T G C T G T G G C T - - - - - T G A T C T T T C C C T T - - - - - 252
Cavia   G T G C C T C T G G C T G G G A G A A - - - - - G G T G G C C C T G G G T G - - - - - C A G G G G A T A G - - - - - A G T G T A A T G C A G A T C T T G G C C T T T T C T T G - - - - - C C A T T T C C C T G S - - - - - 280
Homo    G C C A G C T G A G A G G A A G A A G - - - - - G C T G G C C C T G G A T G - - - - - C A T T C T G A G T G - - - - - G G A G C G C T G C T A C C C T G G C A C C T C C C G A T G G G T T C C C T A G A G C C A C C G T C C 303

Mus      T C T C C T G A G C T C C A A G C T G A C A G T G T T G T T C T T G G T C C C T G C A G 308
Rattus  - - - - - - - - - - - - - - - - - - - - - - - - - - - - - - - - - - - - - - - - - - - - - - - - - - - - - - - - - - - - - - - - - - - - - - - - - - - - - - - - - - - - - - - - - - - - - - - - - - - 279
Cavia   - - - - - - - - - - - - - - - - - - - - - - - - - - - - - - - - - - - - - - - - - - - - - - - - - - - - - - - - - - - - - - - - - - - - - - - - - - - - - - - - - - - - - - - - - - - - - - - - - - - 311
Homo    C C C T G G C C A C A T C C A S G C C T G A C C T T G C A C C C C T G C T C T C C A G 348

```

ENSMUSG00000034853 intron 10

Description: Acyl-coenzyme A thioesterase 11 (Acot11)

Intron number: 10

Mouse chromosome: 4

Upstream exon length: 56

Downstream exon length: 67

Mouse intron length: 1165

Intron alignment length: 1472

Total murinae branch length: 0.17427

K\_score: 0.08549

Scaling factor: 0.61374

ENSMUSG00000034853 exon 10 (ORF 0)

|        |                                                              |       |    |
|--------|--------------------------------------------------------------|-------|----|
| Mus    | GATGGGTGAACGGCCGATACCGAGAAAGCCAGTGCCAGGAAGAAGATCCGGCCTGGACAG | - - - | 56 |
| Rattus | GATGGGTGAACGGCCGATACCGAGAAAGCCAGTGCCAGGAAGAAGATCCGGCCTGGACAG | GCGA  | 60 |
| Cavia  | GATGGGTGAACGGCCGATACCGAGAAAGCCAGTGCCAGGAAGAAGATCCGGCCTGGACAG | - - - | 56 |
| Homo   | GATGGGTGAACGGCCGATACCGAGAAAGCCAGTGCCAGGAAGAAGATCCGGCCTGGACAG | - - - | 56 |

ENSMUSG00000034853 exon 11 (ORF 1)

|        |                                                                     |    |
|--------|---------------------------------------------------------------------|----|
| Mus    | GAAATACCTTGTGTCCTGTAAAGCAGGCAGAAAGTGGCCCTGTCTGTCCCTGGGACCCTAGCAACCA | 67 |
| Rattus | ---TACCTTGTGTCCTGTAAAGCAGGCAGAAATGGCCCTGTCTGTCCCTGGGATCCTAGCAACCA   | 63 |
| Cavia  | GAAGTACATTGTGTCCTGCAAGCAGGCAGAAAGTGGCCCTCTCTGTGCCCTGGGACCCTAGCAACCA | 67 |
| Homo   | GAAGTACATCTGTGTCCTGTAAAGCAGACAGAGGTGCCCTCTCTGTCCCTGGGACCCTAGCAACCA  | 67 |

ENSMUSG00000034853\_intron\_10

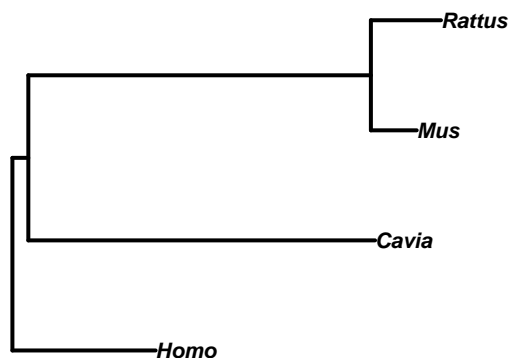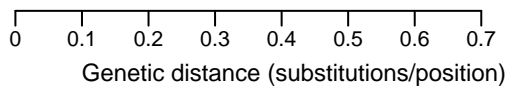

Mus Rattus Cavia Homo  
G T G G G T G G G C C T G G G C A G T G G G A G G C C G T A C T T C A G G G C T G C T G C A C C T G C T G C C C T G A G A C A G T C . . . . . T T C A G G A A T C C T C C T G G A C T . . . . . 90  
G T . . . . . G G G C T G G G C T G T G G G A G G G A C C . . . . . G T T C A G G G C T G T T C A G C T G C T G C C C A G G C A T T C . . . . . T T C A G G A A T C C T C C A G G C T C A G T A A T G G C C 97  
G T G A G T G G G A T G G A T G G G A G G A A T T G T G A T T C G G G C T G T G T T T C T G G A G A C T G A G G C A C T G C C T G G G C C G G A A T G C A T G G A G C T T G G C C T G G C C 110  
G T G A G T A G G G G C G A T T G G T G G G A G A A T T G T G A T T C G G G C T G T G A C C G C C G T G A G G C A G G C A G G C T G C T T T C T T C A G A G C T G C T G G G T T G G C C C T G G C C 110

Mus Rattus Cavia Homo  
T G C C T T T T C A T T C T C C T T T T A A A T T T A T T T T A T T T T T A A C A T T T A T T T A T T A T A T A G A C T A C C T A C T A C T G T T G A . . . . . G A C A C A C C A G A A G A G G A C C T 151  
C G G C C C T T T A C A T C C T C T C . . . . . G T T T T G C T T T T A A C A C A C A C G G G T C T T T G C C C T T T A G C A G G C C T . . . . . G A C A C A C A C G G C A G G A T T G 148  
C G G C C C T T T A C A T C C T C T C . . . . . G T T T T G C T T T T A A C A C A C A C G G G T C T T T G C C C T T T A . . . . . C A C A C A G A G G A C C T 184

Mus Rattus Cavia Homo  
A G A T C C A T T A T G A T G G T T G T G A G C C A C C A T G T G T T G C G G G A T T G A A C T C A G G A C C T T G G A A G A G A C A C T A G . . . . . T T T T A A C C G C T G A G T C A C T T T C C A G C C T 258  
A G A T C C A T T A C A G A T G T T G T G A G C C A C C A T G T G T T G C T G G A T T T G A A C T C A G G A C C T C T G A A G A G A G C A C T C A C T G C T T T A A C C A C T G A C C A T C T C C A G C C C 309  
G T G G C A C A C A G C A G T G G . . . . . G C C A G T G G C A C C A G T G G A A C T . . . . . G A G C A G C A G . . . . . 200  
A G G . . . . . C A G A G C G G . . . . . G T T A G G T G C C T G C C A G G A C A C A M A T A T C A T A C C A G A C T G A A T T T G A A G T G . . . . . 255

Mus Rattus Cavia Homo  
C T C A T T C C T T T T A A A T T T T A T T T A T T T T G A G C A T G A T C T G A C A C T G A G . . . . . C C C T G T A C C T A G G C T G G C T G G A A C T C T C T A A G T A G T T C A A G C T G G T C T T 364  
. . . . . T T A A A T T T T A T T T A T T T T G A G C A T A T C T C A C A T G T C . . . . . C C C T G T A C C T A G G C A G T G T G A A C T C A C T A A G T A G T T C T G C T G G T C T T 402  
. . . . . G C T G A G C C A G C C C A T T A A A T G C T G T T G C A T T G G A . . . . . G A G A A G C C T G A G A A A C G T T C A G A G A G G A G A T G G C T T G 270  
. . . . . G C T G A G C C A G C C C A T T A A A T G C T G T T G T T G C A T T A T T C T G A T G C C C A T T T G G C A G A T G A A G A A C G T T C A G A G A G A G A T C C A G T T G T 352

Mus Rattus Cavia Homo  
A A C T C T T G G . . . . . . . . . . . A T T C C T C T G C C T C A G T C A T C T G A T T G G C C T T T G A T C C A T A G T C C T G A G T C A G A T C T 436  
A A C T T T A G A . . . . . . . . . . . T T C T C T G C C T C T C A T C T G G A T G G C C T T T G A T C C A T A G T C T G C A T A G T C T T C A G A C T 474  
A G G C C T A A A T G T G T G G A C T C T G C C G C C T G A G C C C T T G C A A C T C A G C . . . . . G C C T G C G A G A C T G C T G G G T G C A C A G G T G C C G T A A G T G G A A G T C A C T G A G C T A G T 380  
A A G A G C T A A A . . . . . . . . . . . G C C A C T T T G G A G A C T G G G A C A C A T C C C C T G A G T . . . . . T C A G A G T 409

Mus Rattus Cavia Homo  
T A G C G C C T C T A G A A C C A G G A C A C T G A G G A C A G A A G G T A G A T . . . . . T C T T G T C . . . . . C T C A G G A C A C A C A T T G A G T G A G A T C 514  
T A G G G C T T T G T A G A C C A G G A C A C T G A G G A C A G A A G G T A G A T C . . . . . T C T T G T C . . . . . C T C A G G A C C G G T T G A G T G A G A T C 552  
T C A G . . . . . G A C C T G A G G T G A G C A G G A T T C C A G T T A A A G C . . . . . C A G C T T G G G A A C T T A G T G A C T T A G T T A G G G A T T G C C C G C A A A T T C A T A G G G A C C A G C C G 487  
T C A G A C T A G C C T G C C A C A T G A . . . . . T G C A T T G C C A . . . . . G A G A A G C C T G G G A T T A A A G T A A A A T A C A A A A A A T T A G C T G G C G 474

Mus Rattus Cavia Homo  
T G T G T C C T G G C T A G T C T G G G T G A T T C G G C C A T T A C T C T C A G T G C T T T T G T A T G G C C A T G A A G G G T C A A A T C T C T G C A C T C A G . . . . . G A G A G G A A G T A 617  
T A G T A G . . . . . T T G G T C C T G T A C T C T G A G T A C T G C T T C T T G G C C A T G A A G G G T C A A A T C T G C C A C A G C C . . . . . G A G A A T G A G G T A 632  
T A G T A G . . . . . T T G A C A C T T G A E C C A G A A C T . . . . . T T G G . . . . . G A G A C A A G G A G G 634  
T G T G G . . . . . C T C T C C C T G T A E C C A G T G C A . . . . . C C T A T A G C A G A G G C T G A G C T G A G G C A A 634

Mus Rattus Cavia Homo  
A G G A T T G . . . . . A C A T A A G T T C A A G C . . . . . . . . . . . C A A C C T G G C C T A C A T A G A G A . . . . . T 660  
A G G A T T G . . . . . C C A A A G T T T A A G G A . . . . . . . . . . . C A A C C T G G C C T A C A T A G A G A . . . . . T 675  
A G A T T C A . . . . . C T C T A G T T T A G G T . . . . . T A C C T T G G C C T A C A T A G T T G A A T T T A A G C C T G C C T G A A C T A C A C A G T G C A 607  
A G A A T C C T T G A A C G G G A C T T G A G G T T G T A G C A A G C C A G A T T G T C C A T T G C A C T C A C C C T G G G A C A G A C A . . . . . G A 615

Mus Rattus Cavia Homo  
A C C A T C T C A A C C A A A A T A A A T C A A T T A A A C A A A G C C C A . . . . . A A A G G T C T A G A G C A T A G A C C C A A T G C C T C A A G A C A T G T A A C T G G T A T G T G T G T G T C T G A A C T G C C G C A A A G C A 770  
A C C A T C T C A A C C A A A A A A A A T C A A T T A A A G A A A A C C C A . . . . . A A A G G T C T A G A G C A T A G A C C C A A C C G G C T C A A A C A T G T A A C T G G T A T G T G T G T G T C T T G T A A A G T 784  
C C T G T C T C A A A A A A C C A A A G A A G A A A A A A A A A A A A A . . . . . C A A A A G C C A A C C G G C C A P G A A T A A A A T A A A G T A A C A A A . . . . . A G A G A A G G 686  
C T C T C T C A A A A T A A A T A A A T A A A T A A A A A T G A A G . . . . . C A . . . . . G G T G T C T G A C T C T G T T G T G A A G C 680

Mus Rattus Cavia Homo  
C C T C G A G A G T G A G C A T G C T G T A G A T G C A . . . . . C C A G C C T C A G A C T T G T T A T T G A A A G G A A . . . . . G A C C T A C A T T T C T G G A C A T T T T C A T A G C C T A A G C A C T G 870  
C C T C G A G A C T G A G G T G T T G C C G C A T T C C T G C C T C A C A C A T T A T T A T T A A T G A G A A A . . . . . T G C C T T G C T T C T G A A C A T T T A C A T G C T A T C C C T G 856  
G A G C A G G A A G G G A G A A G A A G G G A A A . . . . . G G T G T C C A C A T T G . . . . . T A C C T T G G C C T A C A T A G T T G A . . . . . G A G C G T T T G C A G A G A T C A G T G C 765  
A T T T A T T G G A C T T A G A G C C T G T A G G C A C A . . . . . G C A G G G A T C A C A A C C T G T T G T A G T A A G A A A T G T G C A T T C T A T G C A T T T A C T G A C A T T T A C G T T G C A A G C A C T G 788

Mus Rattus Cavia Homo  
T C T C C T T C A A A G C C C C T T G A A T T A G A G A C G A C . . . . . A T T G S A T . . . . . T C C A T T C A A A G . . . . . A G A A C A C T G A G C C G . . . . . T G C A A T G G G T . . . . . 947  
T C C T C C T T C A A A G C C C C T T G G A G G T A G A G A G A G . . . . . A T T G S G T . . . . . T C C A T T C A A A G . . . . . C G A A C C C T G A G A A G . . . . . T A C C A G G G T . . . . . G G T C T 968  
C A C T C C T C T G G C A G C C T T A G . . . . . G C T G S T . . . . . G T C T C C C C A T T T C T T A G . . . . . T T C A G A C A T G G G G A A A G G G T A A A G G T G A T C A A A G G G T . . . . . 854  
. . . . . T T A T T G T A T T C C C A T T G A G G C A G G G T G A C T G C T A A T . . . . . C C A T T T C A C A . . . . . T A G A G A C A C A C C A G C C A G G G T G A G C A C T C A G C A G G G T . . . . . A T T G 886

Mus Rattus Cavia Homo  
C A C C G G A R C T G A G . . . . . . . . . . . C T T G T C C C T T C C T C C A G T C C C C T G T A A C T T C C A G A C T C T A G C T O R T O T G T T . . . . . C T C A C C T G C T G T G T T 1036  
G S C S G A C T C A G . . . . . . . . . . . G T T G S T . . . . . C C T C A G C T G C C C T T G C C C A G C T T C C C T G T A A C T A G A C T A T A B O T G A A C T O R . . . . . G T C T C T A G C C T G C T T T T G 1044  
. . . . . G T A G A C T A G . . . . . . . . . . . C C T T G C T C C C C A T T C T T A G . . . . . T T C A G A C A T G G G G A A A G G G T A A A G G T G A C T C C C T A C A A G G G T . . . . . A C C C T A G A C T G C T T C C T A 934  
G T T G T G G A A T T G A G C C C T T A G A G C C A T A C C C T T C C T T G C T G G C T G C C C T G C A G C T T C T G A G C T A G G G C C G A G C T G G T T G C C C T A G C T G C T G T G C T 996

Mus Rattus Cavia Homo  
T C T G T A C C C G T G C C C A A T G C C C T G C C A G G C A G A G T C T C A A C C C A C T G A G C T . . . . . T G C A C T G G C C T G G C A A T G A T G T T T G C C A A A C A C A G T G 1128  
T C T G T G C C A T T G C C C A C T G C C C A T G C C A G G C A G A G T C T C G A A C C C A C T G A G C T . . . . . G C C C T G A G C T G G C A C T G A T G T C T G C C A A A C A C A G T G 1136  
T C G G T G T G G G T C A C C T G A . . . . . T C C C T A G C C C G A G C C C A C C C A C C C T G C C C C C C A G G C . . . . . A G C A T G A G C C T T C T . . . . . 1005  
T C G T G A G A A T T C A G C C . . . . . T C C C T A G C C A C A C A G A G T G C C C A T T G C C G G G C T C A C C A G A G G C C T A G C A G A G T A G G C T T G C A G T A G A G T C T G C A A G T G C T G 1104

Mus Rattus Cavia Homo  
A A C T C T G A G A G A C C C A G G T T G T G C T C T T G C C T C T . . . . . T C A G 1165  
G A C T C T G A G A G A C C C A G A T T G C G T T T C C T C T T A G G A G 1177  
. . . . . G C T T A G A G A C C C A G A G T G C A T T C T C G C C C A C A C A 1042  
A A G T T G A G G G A C C A A G G T T G T A T C T T C T C C T T C C A G 1146



ENSMUSG00000028582 intron 17

Description: Coiled-coil and C2 domain-containing protein 1B (Cc2d1b)

Intron number: 17

Mouse chromosome: 4

Upstream exon length: 117

Downstream exon length: 74

Mouse intron length: 258

Intron alignment length: 345

Total murinae branch length: 0.25564

K\_score: 0.05116

Scaling factor: 0.61914

ENSMUSG00000028582 exon 17 (ORF 1)

|        |      |       |       |     |         |                |                 |                     |             |    |
|--------|------|-------|-------|-----|---------|----------------|-----------------|---------------------|-------------|----|
| Mus    | GTTT | GAGA  | GGCTT | GGG | AGGACC  | GAAAGAAACAGCTT | GAGATCCTGCAGCTA | GGCCCAAGGCCAGGGCCTT | GACCCTCCCTA | 80 |
| Rattus | GTTT | GAGA  | GGCTT | GCT | GAGGACC | GAAAGAAACAGCTT | GAGATCCTGCAGCTT | GGCCCAAGGCCAGGGCCTT | GACCCTCCCTA | 80 |
| Cavia  | GTTT | GAGA  | GGCTT | GCT | CAAGACC | GAAAGAAACAGCTT | GAGATCCTGCAGCTT | GGCCCAAGGCCAGGGCCTT | GACCCTCCCTA | 80 |
| Homo   | ATT  | TGAGA | GGCTT | GCT | CAGGACC | GAAAGAAACAGCTT | GAGATCCTGCAGCTT | GGCCCAAGGCCAGGGCCTT | GACCCTCCCTA | 80 |

  

|        |       |        |       |           |              |     |
|--------|-------|--------|-------|-----------|--------------|-----|
| Mus    | GTCAT | CACTTT | GAGCT | GAAGACATT | CCAGACTGTGAG | 117 |
| Rattus | GTCAT | CACTTT | GAGCT | GAAGACATT | CCAGACTGTGAG | 117 |
| Cavia  | GTCAT | CACTTT | GAGCT | GAAGACATT | CCAGACTGTGAG | 117 |
| Homo   | CCAC  | CACTTT | GAGCT | GAAGACATT | CCAGACTGTGAG | 117 |

ENSMUSG00000028582 exon 18 (ORF 1)

|        |        |            |         |                         |                    |                |    |
|--------|--------|------------|---------|-------------------------|--------------------|----------------|----|
| Mus    | GATCTT | TCTCAGAACT | CAACAGC | CACAGAAATGCATCTGATCAT   | CGTCCGGGGAATGAACCT | CCCAGCCCCGCCAG | 74 |
| Rattus | GATCTT | TCTCAGAACT | CAAT    | AGCACAGAAATGCATCTGATCAT | CGTCCGGGGAATGAACCT | CCCAGCCCCGCCAG | 74 |
| Cavia  | GATCTT | TCTCAGAACT | CAACAGC | CACAGAAATGCATCTGATCAT   | CGTCCGGGGAATGAACCT | CCCAGCCCCGCCAG | 74 |
| Homo   | GATCTT | TCTCAGAACT | CAACAGC | CACAGAAATGCATCTGATCAT   | CGTCCGGGGAATGAACCT | CCCAGCCCCGCCAG | 74 |

ENSMUSG00000028582\_intron\_17

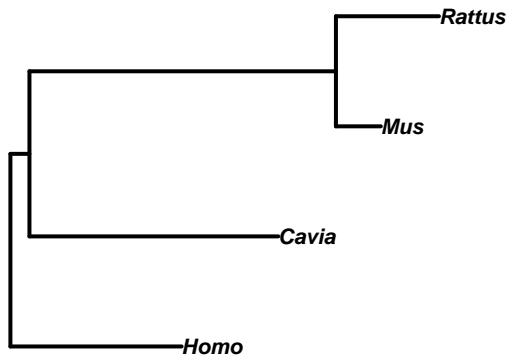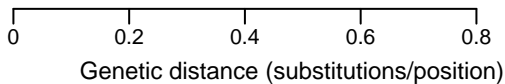

|        |                                                                                                                                                                                                                   |     |
|--------|-------------------------------------------------------------------------------------------------------------------------------------------------------------------------------------------------------------------|-----|
| Mus    | G T G C C A A T G C C T A A G G G A A A C T G G C C C T G T G C A G G G C T A G G G A G G C C A G A G T T T G G A C T A G A G C C T A G A G A C T C T G C A G T C T T A G T G A G A C A C C C A G . . . . .       | 101 |
| Rattus | G T G C C A A T G C C T A A G G G A A T T G G C C C T G T G C A G A G A T A G G G A G G C A G C A G T T T G G A G C A G A G C C T G G A G A C T C T C A G T C T T T A T T G A G A C G T C C C A G . . . . .       | 99  |
| Cavia  | G T G C C A A T G C C C A T G G G A A C A T A . . . . . G C T C A T A T A G A C A G G C T G G A A T T G G A G C C A G G . . . . . G T C T T A G C A G A C T C C C T A G . . . . .                                 | 82  |
| Homo   | G T A C C A A G G C C T A G G A A C A G G E . . . . . G C T C A G G C A G G A G G G C A G G A G C T T G G A G C C A G G C G A G A G A C T G C T A C C C C T T T A S T G A G C T T C C C A A G C T G G C C C       | 106 |
|        |                                                                                                                                                                                                                   |     |
| Mus    | T A T C G T G G G T A T T G G A C T G G C G G A G C T T G C T G T C C T G C C T A T A G G A G G A C . . . . . C T C A G G G T T G . . . . . C A G G G T T C A G A G A C C A A G C A                               | 182 |
| Rattus | T G T A T G G G T G T T G A C T G C G G A A A T G C C T G C T G C T T G G A G G T A G . . . . . C T C G G G T T G . . . . .                                                                                       | 159 |
| Cavia  | C A T G S T A G G C T T T G G G C T T G C T G A G G A G G A G . . . . . C A T C T G C A G G G A . . . . . C T T T G T G T G . . . . .                                                                             | 138 |
| Homo   | C G C T G T G G G C A C T G G G C T T G C T G A G G A G C A C A G C T G G A T G C T A G T G G A G A G C C A C A G C T G T C T G G T G C T G G A A A G A G C T C T G G A C C A G A A C T C A G A G A T C A A G C T | 216 |
|        |                                                                                                                                                                                                                   |     |
| Mus    | C . . . . A A C C A G C A T G G C T C A C C T G C A A C T G T G T C C C . . . . . C C T T G T C T T C T G T C T G T C T T C T G C A C T C T C T                                                                   | 247 |
| Rattus | . . . . . C A G C T C C A C C C T A C A G C C T G T G C T T G . . . . . G C C C T T A T C T T G T C T T G T C C T C T G C A C T C T C T                                                                           | 217 |
| Cavia  | . . . . . G C T G T G G C C T T C T C C T C T T T G G C C A C C C A G C T G A C A G A G C T A C T A G A G A G G C G A G . . . . . G G E T T C T G C C G C T T G C T T C T A T C G A G C T C T T C T               | 233 |
| Homo   | C T G C A T A C C A G C T C T G C C T T C C C T C C G T C A C A C C C A G C T G G C A G A C A G C C T G A C G A A G G A C C T T G T T C C A C T A C T G T C C T T C A C T T T G A G C A T T T T C T G C T         | 326 |
|        |                                                                                                                                                                                                                   |     |
| Mus    | T C A C T C T G . . . . T A G                                                                                                                                                                                     | 258 |
| Rattus | T C A T T C T T T C T A G                                                                                                                                                                                         | 232 |
| Cavia  | T C . . . T T G G C T G A G                                                                                                                                                                                       | 245 |
| Homo   | C C G C . . . T T G C C T A G                                                                                                                                                                                     | 341 |

ENSMUSG00000030693 intron 1

Description: kallikrein related-peptidase 10 (Klk10)

Intron number: 1

Mouse chromosome: 7

Upstream exon length: 91

Downstream exon length: 184

Mouse intron length: 1110

Intron alignment length: 1852

Total murinae branch length: 0.18863

K\_score: 0.04681

Scaling factor: 0.61939

ENSMUSG00000030693 exon 1 (ORF 0)

```

Mus      ATGAGG GTCCCG CTCTTCCACCTCTGCACTGCCTCTGGCTCCTGGTCCCTGGTGAAGCTTCTGCTGCCGCTACTGATGGT 80
Rattus  ATGAGG GTCCCG CTCTTCCACCTCTGCACTGCCTCTGGCTCCTGGTCCCTGGTGAAGCTTCTGCTGCCGCTACTGATGGT 80
Cavia   ATGAGACCCCTTGCACCTCTGCACTGCCTCTGGCTCCTGGTCCCTGGTGAAGCTTCTGCTGCCGCTACTGATGGT 80
Homo    ATGAGAGCTCCGCACTCTGCACTGCCTCTGGCTCCTGGTCCCTGGTGAAGCTTCTGCTGCCGCTACTGATGGC 77

Mus      GCAACTCTGGG 91
Rattus  GCAACTCTGGG 91
Cavia   GCAACTCTGGG 91
Homo    GCAACTCTGGG 88
    
```

ENSMUSG00000030693 exon 2 (ORF 2)

```

Mus      GGGGCAGGCTCTGCTGCTCCCGGSAAAACGCCACGCCCGTGGACCTCGAGGGCCTCCGGGGGC-----CCAGTGGAG 71
Rattus  GGGGCAGGCTCTGCTGCTCCCGGSAAAACGCCACGCCCGTGGACCTCGAGGGCCTCCGGGGGC-----TCTGTGGCTCG 71
Cavia   TCCGGGAGCGG--GCAAGCTGGCTGAAAACCTGACGGCCGTGGACATCAAGGACTCCAGCTCTGGTGAAGTCCCTGTGTCC 77
Homo    CCGGAGAGGGCGGCTGCTCCCGCAAAAACGATCACGGCGTTGGACCGCGAAGCCTATGGCTC-----CCGGTGGCG 71

Mus      CGTGACTATCATCCCTGGCAGGTCTCCCTCTTCCATAACCTCCAGTTCCAATGTGCGGGGTGTCTCTGGTGGACCAGAACTG 151
Rattus  AGTGTCTCTCAAACCTGGCAGGTCTCCCTCTTCCATAACCTCCAGTTCCAATGTGCGGGGTGTCTCTGGTGGACCAGAACTG 151
Cavia   GACGGCTCGCAGCCCTGGCAGGTCTCCCTCTTCAATGGCCTCAGATTCCACTGCGGGGGCGTGTCTGGTGGACCAGAACTG 157
Homo    CGCGGCTCGCAGCCCTGGCAGGTCTGCTCTTCAACGGCCTCTCGTTCACACTGCGGGGGTGTCTCTGGTGGACCAGAACTG 151
    
```

ENSMUSG00000030693\_intron\_1

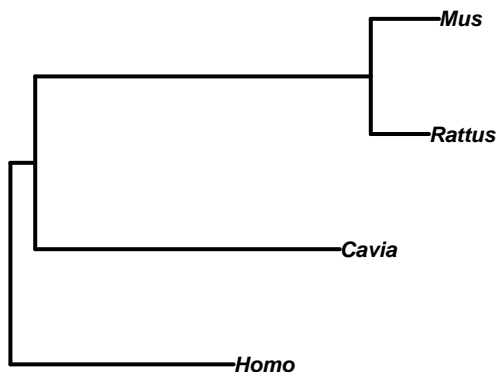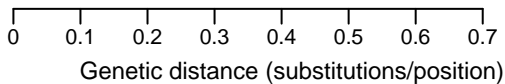







ENSMUSG00000026354 intron 16

Description: lactase (Lct)  
 Intron number: 16  
 Mouse chromosome: 1  
 Upstream exon length: 231  
 Downstream exon length: 218  
 Mouse intron length: 1119  
 Intron alignment length: 1614  
 Total murinae branch length: 0.22392  
 K\_score: 0.03662  
 Scaling factor: 0.62672

ENSMUSG00000026354 exon 16 (ORF 2)

|        |          |          |       |         |         |     |      |        |         |      |      |      |      |       |      |      |    |
|--------|----------|----------|-------|---------|---------|-----|------|--------|---------|------|------|------|------|-------|------|------|----|
| Mus    | GGCTTTCG | CAGAGAGG | TTGGG | GTGCACT | TTTGTGA | ACC | GGCT | CTGACC | CTTCTTT | GGCC | AAGG | ATCC | CCCA | AGGCG | TCAG | CCAA | 80 |
| Rattus | GGCTTTCG | CAGAGAGG | TTGGG | GTGCACT | TTTGTGA | ACC | GGCT | CTGACC | CTTCTTT | GGCC | AAGG | ATCC | CCCA | AGGCG | TCAG | CCAA | 80 |
| Cavia  | GGCTTTCG | CAGAGAGG | TTGGG | GTGCACT | TTTGTGA | ACC | GGCT | CTGACC | CTTCTTT | GGCC | AAGG | ATCC | CCCA | AGGCG | TCAG | CCAA | 80 |
| Homo   | GGCTTTCG | CAGAGAGG | TTGGG | GTGCACT | TTTGTGA | ACC | GGCT | CTGACC | CTTCTTT | GGCC | AAGG | ATCC | CCCA | AGGCG | TCAG | CCAA | 80 |

  

|        |         |        |        |       |         |        |        |         |        |       |      |      |      |       |     |     |
|--------|---------|--------|--------|-------|---------|--------|--------|---------|--------|-------|------|------|------|-------|-----|-----|
| Mus    | GGTCTAC | GGCCTC | CAATAG | TCCG  | CTGCAAT | GGCTTT | CTGACC | CTGCACA | AAGGAC | CTCAT | CCTT | GTCT | CCAG | CAACC | AAG | 160 |
| Rattus | GTTCTAT | GCCACC | ATGCT  | CCGCT | GCAAT   | GGCTTT | CTGACC | CTGCACA | AAGGAC | CTCAT | CCTT | GTCT | CCAG | CAACC | AAG | 160 |
| Cavia  | GTTCTAT | GCCACC | ATGCT  | CCGCT | GCAAT   | GGCTTT | CTGACC | CTGCACA | AAGGAC | CTCAT | CCTT | GTCT | CCAG | CAACC | AAG | 160 |
| Homo   | GTTCTAT | GCCACC | ATGCT  | CCGCT | GCAAT   | GGCTTT | CTGACC | CTGCACA | AAGGAC | CTCAT | CCTT | GTCT | CCAG | CAACC | AAG | 157 |

ENSMUSG00000026354 exon 17 (ORF 2)

|        |         |         |     |       |        |    |     |       |       |       |      |       |     |      |      |      |       |    |    |
|--------|---------|---------|-----|-------|--------|----|-----|-------|-------|-------|------|-------|-----|------|------|------|-------|----|----|
| Mus    | ATGCTGG | CCCCACT | GGC | CAGGC | CTGTGA | -- | AGT | CAGAG | GTGCC | CTTCT | GGGG | CTGAT | GCT | GGGC | ACGG | CAGA | AGCAC | AG | 77 |
| Rattus | ATGCTGG | CCCCACT | GGC | CAGGC | CTGTGA | -- | AGT | CAGAG | GTGCC | CTTCT | GGGG | CTGAT | GCT | GGGC | ACGG | CAGA | AGCAC | AG | 77 |
| Cavia  | ATGCTGG | CCCCACT | GGC | CAGGC | CTGTGA | -- | AGT | CAGAG | GTGCC | CTTCT | GGGG | CTGAT | GCT | GGGC | ACGG | CAGA | AGCAC | AG | 77 |
| Homo   | ATGCTGG | CCCCACT | GGC | CAGGC | CTGTGA | -- | AGT | CAGAG | GTGCC | CTTCT | GGGG | CTGAT | GCT | GGGC | ACGG | CAGA | AGCAC | AG | 80 |

  

|        |        |        |      |      |      |       |       |      |       |      |      |      |       |      |       |      |       |      |     |
|--------|--------|--------|------|------|------|-------|-------|------|-------|------|------|------|-------|------|-------|------|-------|------|-----|
| Mus    | ACGGCT | CTGTAT | GTCT | CTTT | CGCT | TTGTG | CTGCT | GCTT | GGACT | TTGC | AGCC | CTGG | CATTT | CTGT | ATACA | AATA | CTGCA | AGCC | 157 |
| Rattus | ACAGCT | CTGTAT | GTCT | CTTT | CGCT | TTGTG | CTGCT | GCTT | GGACT | TTGC | AGCC | CTGG | CATTT | CTGT | ATACA | AATA | CTGCA | AGCC | 157 |
| Cavia  | ACAGCT | CTGTAT | GTCT | CTTT | CGCT | TTGTG | CTGCT | GCTT | GGACT | TTGC | AGCC | CTGG | CATTT | CTGT | ATACA | AATA | CTGCA | AGCC | 157 |
| Homo   | ACAGCT | TTGTAC | GTCT | CTTT | CGCT | TTGTG | CTGCT | GCTT | GGACT | TTGC | AGCC | CTGG | CATTT | CTGT | ATACA | AATA | CTGCA | AGCC | 160 |

ENSMUSG00000026354\_intron\_16

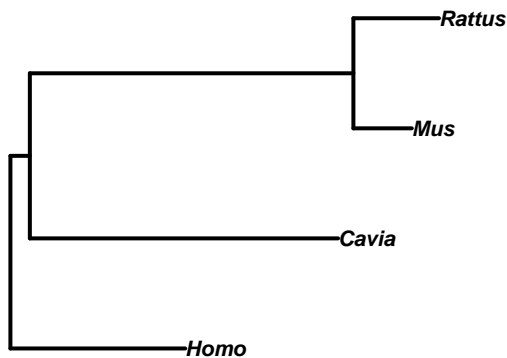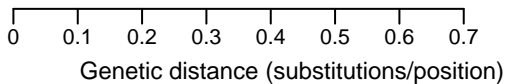

Mus Rattus Cavia Homo  
GTGAC - GTGGCTCTGGGAGGAAC - AACTGATGGGGAAGGGCAAGAGGGGCTGTTCTTCCACCAACCCACCTTCCAGCTCAGATGTTT - - - - - GCCACA 96  
GTGAG - GTGGCTCTGGGAGGGACC - AGCTAAHGGGCAAGGGCAAGAGGGAACTTTT - - - - - CCGACCGACCTCCTAGTTTCAAGCTTC - - - - - GCCACA 89  
GTAGC - - - - - GGCTGTGTGGGAGCCATAAAGCAAAAGGCTGAAAGGGCAAGAGGAACTTTT - - - - - CCGACCGACCTCCTAGTTTCAAGCTTC - - - - - GCCACA 92  
GTGAGATGTGGCTCTGGGAGGGAAATAAAGGCTAAAGGGTGAAGGGCAAGAGGGAACTTTT - - - - - CCGACCGACCTCCTAGTTTCAAGCTTC - - - - - GCCACA 92  
C110  
Mus Rattus Cavia Homo  
GTTTCAATGCTTTCAGTCTG - - - - - TTAGCAAGCTGGCTCCAA - - - - - GGCTCTGTTAGGGCTCGGGCTTGGTGTTCAGTAGAGACCGGGGCTCG 171  
GTTTCAATGCTTTCAGTCTG - - - - - TTAGCAAGCTGGCTCCAA - - - - - GGCTCTGTTAGGGCTCGGGCTTGGTGTTCAGTAGAGACCGGGGCTCG 181  
CCCTTCCATTCAATCAACAAGATT - - - - - TCTGTGAGTCTCCAGACATTTCTTGAAGTAAAGGAGGTTAGGCAGGGGATGTACACACTGGGAGCTAGGA - - - - - 193  
TCTTCCATTCAATCAACAAGATT - - - - - TCTGTGAGTCTCCAGACATTTCTTGAAGTAAAGGAGGTTAGGCAGGGGATGTACACACTGGGAGCTAGGA - - - - - 220  
Mus Rattus Cavia Homo  
TGTAGCAATGAGGAGTTCAGATTCTCTG - - - - - CACCCTAAGTCATGTTGGCTCTTCTTGAG - - - - - GACAGATGCTTCCAGGCAGT - - - - - CACTA 260  
TGTAGCAATGAGGAGTTCAGATTCTCTG - - - - - CACCCTAAGTCATGTTGGCTCTTCTTGAG - - - - - GACAGATGCTTCCAGGCAGT - - - - - CACTA 273  
TGTAGCAATGAGGAGTTCAGATTCTCTG - - - - - CACCCTAAGTCATGTTGGCTCTTCTTGAG - - - - - GACAGATGCTTCCAGGCAGT - - - - - CACTA 243  
CCCTTCCATTCAATCAACAAGATT - - - - - TCTGTGAGTCTCCAGACATTTCTTGAAGTAAAGGAGGTTAGGCAGGGGATGTACACACTGGGAGCTAGGA - - - - - 320  
Mus Rattus Cavia Homo  
GGTCAAGTCAAGAGGACTAGAAACACATGGGGCTG - - - - - GTACTGGCTGGGGTGAATAAGAAATATAAATGACTATGAAAAATACAA - - - - - GACCATTA 350  
GGTCAAGTCAAGAGGACTAGAAACACATGGGGCTG - - - - - GTACTGGCTGGGGTGAATAAGAAATATAAATGACTATGAAAAATACAA - - - - - GACCATTA 362  
GGTCAAGTCAAGAGGACTAGAAACACATGGGGCTG - - - - - GTACTGGCTGGGGTGAATAAGAAATATAAATGACTATGAAAAATACAA - - - - - GACCATTA 309  
GGTCAAGTCAAGAGGACTAGAAACACATGGGGCTG - - - - - GTACTGGCTGGGGTGAATAAGAAATATAAATGACTATGAAAAATACAA - - - - - GACCATTA 427  
Mus Rattus Cavia Homo  
CCAAATTCAGGATGAAATTTAGTTCGCCAAG - - - - - TGAAGCTTAAAAACAGGCTAGGG - - - - - CTGTGCTATGGCTGTGGTGTGGCT 410  
CCAAATTCAGGATGAAATTTAGTTCGCCAAG - - - - - TGAAGCTTAAAAACAGGCTAGGG - - - - - CTGTGCTATGGCTGTGGTGTGGCT 444  
CCAAATTCAGGATGAAATTTAGTTCGCCAAG - - - - - TGAAGCTTAAAAACAGGCTAGGG - - - - - CTGTGCTATGGCTGTGGTGTGGCT 419  
CCAAATTCAGGATGAAATTTAGTTCGCCAAG - - - - - TGAAGCTTAAAAACAGGCTAGGG - - - - - CTGTGCTATGGCTGTGGTGTGGCT 522  
Mus Rattus Cavia Homo  
CTCAGTGGTGGGAGCTCAGTTCAGTGTGACGAGTGTGGTGGTCTCA - - - - - ATACCTAGCCACATACAAAAGG - - - - - GGATACGATAGCACACCCCTTAATCTTTTTTTTATGTTGGAT 481  
CTCAGTGGTGGGAGCTCAGTTCAGTGTGACGAGTGTGGTGGTCTCA - - - - - ATACCTAGCCACATACAAAAGG - - - - - GGATACGATAGCACACCCCTTAATCTTTTTTTTATGTTGGAT 543  
CTCAGTGGTGGGAGCTCAGTTCAGTGTGACGAGTGTGGTGGTCTCA - - - - - ATACCTAGCCACATACAAAAGG - - - - - GGATACGATAGCACACCCCTTAATCTTTTTTTTATGTTGGAT 461  
CTCAGTGGTGGGAGCTCAGTTCAGTGTGACGAGTGTGGTGGTCTCA - - - - - ATACCTAGCCACATACAAAAGG - - - - - GGATACGATAGCACACCCCTTAATCTTTTTTTTATGTTGGAT 564  
Mus Rattus Cavia Homo  
TTTTTTTATTTACATTTCAAATGTTATTCCGTTTTCCGAGTTTTGTGGAGATAAAGTCCGCTCCCTTCTTCTATAAGGGTGTGCCCTCCCGATCCGTCGCCCTTCCCGCC 481  
TTTTTTTATTTACATTTCAAATGTTATTCCGTTTTCCGAGTTTTGTGGAGATAAAGTCCGCTCCCTTCTTCTATAAGGGTGTGCCCTCCCGATCCGTCGCCCTTCCCGCC 461  
TTTTTTTATTTACATTTCAAATGTTATTCCGTTTTCCGAGTTTTGTGGAGATAAAGTCCGCTCCCTTCTTCTATAAGGGTGTGCCCTCCCGATCCGTCGCCCTTCCCGCC 564  
Mus Rattus Cavia Homo  
CCCCCCACAGTCCCTACACTGGGGGGTCCAGCCTTGGCAGGACCAAGGGCTTCTCCTCCCACTGATGCCCAACAAGGCCACCCTCTGCTACCTATGTGACTGGAGCCATGG 481  
CCCCCCACAGTCCCTACACTGGGGGGTCCAGCCTTGGCAGGACCAAGGGCTTCTCCTCCCACTGATGCCCAACAAGGCCACCCTCTGCTACCTATGTGACTGGAGCCATGG 763  
CCCCCCACAGTCCCTACACTGGGGGGTCCAGCCTTGGCAGGACCAAGGGCTTCTCCTCCCACTGATGCCCAACAAGGCCACCCTCTGCTACCTATGTGACTGGAGCCATGG 461  
CCCCCCACAGTCCCTACACTGGGGGGTCCAGCCTTGGCAGGACCAAGGGCTTCTCCTCCCACTGATGCCCAACAAGGCCACCCTCTGCTACCTATGTGACTGGAGCCATGG 564  
Mus Rattus Cavia Homo  
GTGAGTCCATGTGTGCTTTGACACCCCTGTA - - - - - ATCTAAGCACTTAAAGGAGAAAGCACTAGGTTTGA - - - - - AGTTTCAAGTCAAGCAGTGGCTCCCTG 546  
GTGAGTCCATGTGTGCTTTGACACCCCTGTA - - - - - ATCTAAGCACTTAAAGGAGAAAGCACTAGGTTTGA - - - - - AGTTTCAAGTCAAGCAGTGGCTCCCTG 860  
GTGAGTCCATGTGTGCTTTGACACCCCTGTA - - - - - ATCTAAGCACTTAAAGGAGAAAGCACTAGGTTTGA - - - - - AGTTTCAAGTCAAGCAGTGGCTCCCTG 532  
GTGAGTCCATGTGTGCTTTGACACCCCTGTA - - - - - ATCTAAGCACTTAAAGGAGAAAGCACTAGGTTTGA - - - - - AGTTTCAAGTCAAGCAGTGGCTCCCTG 624  
Mus Rattus Cavia Homo  
CTAGCTAGAGGGCCGCTTCAAGAGAAAAGGAGATATGGTTTGGTGGGGCAGCTG - - - - - AATGGCTCAGAGGTAAGAGCACTATGG - - - - - ATAGGATCAATACAGAAACCA 655  
CTAGCTAGAGGGCCGCTTCAAGAGAAAAGGAGATATGGTTTGGTGGGGCAGCTG - - - - - AATGGCTCAGAGGTAAGAGCACTATGG - - - - - ATAGGATCAATACAGAAACCA 938  
CTAGCTAGAGGGCCGCTTCAAGAGAAAAGGAGATATGGTTTGGTGGGGCAGCTG - - - - - AATGGCTCAGAGGTAAGAGCACTATGG - - - - - ATAGGATCAATACAGAAACCA 569  
CTAGCTAGAGGGCCGCTTCAAGAGAAAAGGAGATATGGTTTGGTGGGGCAGCTG - - - - - AATGGCTCAGAGGTAAGAGCACTATGG - - - - - ATAGGATCAATACAGAAACCA 670  
Mus Rattus Cavia Homo  
AAATAGATTCCTGAAAGCTGCTTCCAATTCACAAAGCATCATGTTATGCAGTACACATATAAAAAACAAATTAATAAAACCAAACCAACAGGCTGGTGGATGGTCT 765  
AAATAGATTCCTGAAAGCTGCTTCCAATTCACAAAGCATCATGTTATGCAGTACACATATAAAAAACAAATTAATAAAACCAAACCAACAGGCTGGTGGATGGTCT 1027  
AAATAGATTCCTGAAAGCTGCTTCCAATTCACAAAGCATCATGTTATGCAGTACACATATAAAAAACAAATTAATAAAACCAAACCAACAGGCTGGTGGATGGTCT 610  
TGAATAGATTCCTGAAAGCTGCTTCCAATTCACAAAGCATCATGTTATGCAGTACACATATAAAAAACAAATTAATAAAACCAAACCAACAGGCTGGTGGATGGTCT 777  
Mus Rattus Cavia Homo  
AGGCAGTAAAGCAGCTACTGCTCTTCAAAAGGCTCTGAGTTCAAAATCCAGCAACCACATGATGGCTCACAAACCATCTATAATGAGATCTGATGCCCTCTTCTGATGGG 875  
AGGCAGTAAAGCAGCTACTGCTCTTCAAAAGGCTCTGAGTTCAAAATCCAGCAACCACATGATGGCTCACAAACCATCTATAATGAGATCTGATGCCCTCTTCTGATGGG 1027  
AGGCAGTAAAGCAGCTACTGCTCTTCAAAAGGCTCTGAGTTCAAAATCCAGCAACCACATGATGGCTCACAAACCATCTATAATGAGATCTGATGCCCTCTTCTGATGGG 646  
AGGCAGTAAAGCAGCTACTGCTCTTCAAAAGGCTCTGAGTTCAAAATCCAGCAACCACATGATGGCTCACAAACCATCTATAATGAGATCTGATGCCCTCTTCTGATGGG 821  
Mus Rattus Cavia Homo  
TCTGAAAGCAGCTACATACATTGTACTTATGATAAATAAATAAATCTTTAAACAAACAGGAGCAACAAACAGCAG - - - - - 953  
TCTGAAAGCAGCTACATACATTGTACTTATGATAAATAAATAAATCTTTAAACAAACAGGAGCAACAAACAGCAG - - - - - 1046  
TCTGAAAGCAGCTACATACATTGTACTTATGATAAATAAATAAATCTTTAAACAAACAGGAGCAACAAACAGCAG - - - - - 701  
TCTGAAAGCAGCTACATACATTGTACTTATGATAAATAAATAAATCTTTAAACAAACAGGAGCAACAAACAGCAG - - - - - 878  
Mus Rattus Cavia Homo  
CAGTCAAGGGGACCCATGCCAACACCCACAGCCTAGGAGCTTGTCTTCTGTCTATGTTTGGGGTGTACTATAAGCCCTCGGACCCGACGAGCC - - - - - AGCAGGACTTTT 1061  
CAGTCAAGGGGACCCATGCCAACACCCACAGCCTAGGAGAGCTTGTCTTCTGTCTATGTTTGGGGTGTACTATAAGCCCTCGGACCCGACGAGCC - - - - - AGCAGGACTTTT 1152  
CAGTCAAGGGGACCCATGCCAACACCCACAGCCTAGGAGAGCTTGTCTTCTGTCTATGTTTGGGGTGTACTATAAGCCCTCGGACCCGACGAGCC - - - - - AGCAGGACTTTT 801  
CAGTCAAGGGGACCCATGCCAACACCCACAGCCTAGGAGAGCTTGTCTTCTGTCTATGTTTGGGGTGTACTATAAGCCCTCGGACCCGACGAGCC - - - - - AGCAGGACTTTT 955  
Mus Rattus Cavia Homo  
TCCAGACCA - - - - - GCTGCTGCT - - - - - AACAGTCTAGAGGCTGAGCCCTCC - - - - - ATTGCTTTTCTCTAG 1119  
TCCAGACCA - - - - - GCTGCTGCT - - - - - AACAGTCTAGAGGCTGAGCCCTCC - - - - - ATTGCTTTTCTCTAG 1209  
TCCAGACCA - - - - - GCTGCTGCT - - - - - AACAGTCTAGAGGCTGAGCCCTCC - - - - - ATTGCTTTTCTCTAG 875  
TCCAGACCA - - - - - GCTGCTGCT - - - - - AACAGTCTAGAGGCTGAGCCCTCC - - - - - ATTGCTTTTCTCTAG 1026







ENSMUSG00000040680 intron 2

Description: Kremen protein 2 Precursor (Kremen2)

Intron number: 2

Mouse chromosome: 17

Upstream exon length: 175

Downstream exon length: 92

Mouse intron length: 698

Intron alignment length: 1243

Total murinae branch length: 0.27735

K\_score: 0.03133

Scaling factor: 0.62814

ENSMUSG00000040680 exon 2 (ORF 2)

|        |            |   |                  |                                          |               |    |
|--------|------------|---|------------------|------------------------------------------|---------------|----|
| Mus    | TCCAGGTGAA | C | GGCGCTGACTACCGA  | GGCCACCAGAACTACACCGGCCACGGSSAGCTGGACGGCC | TTGTCTTTTCTGG | 80 |
| Rattus | TCCAGGTGAA | C | GGCGCTGACTACCGG  | GGCCACCAGAACTACACCGGCCACGGSSAGCTGGACGGCC | TTGTCTTTTCTGG | 80 |
| Cavia  | TCCAGGTGAA | T | GGCGCTGACTACCGT  | GGCCACCAGAACTACACCGGCCACGGSSAGCTGGACGGCC | TTGTCTTTTCTGG | 80 |
| Homo   | TCCAGGTGAA | T | GGCGCTGACTACCGGG | GGCCACCAGAACTACACCGGCCACGGSSAGCTGGACGGCC | TTGTCTTTTCTGG | 80 |

  

|        |                                         |                                  |                      |                      |     |
|--------|-----------------------------------------|----------------------------------|----------------------|----------------------|-----|
| Mus    | GACCAGACACAGCAGCAGCTACAGCAGCGCCAGCGACCC | TCAGGGCCGCTGGGGCT                | GGGTGCGCATAACTTCTGTA | CG                   | 160 |
| Rattus | GACCAGACG                               | CAGCAGCAGCTACAGCAGCGCCAGCGACCC   | TCAGGGCCGCTGGGGCT    | GGGTGCGCATAACTTCTGTA | CG  |
| Cavia  | GACCAGACACAGCAGCAGCTACAGCAGCGCCAGCGACCC | TCAGGGCCGCTGGGGCT                | GGGTGCGCATAACTTCTGTA | CG                   | 160 |
| Homo   | GACCAGACG                               | CAGCAGCAGCTACAGCAGCGCCAGCGACCCCA | CGGCCGCTGGGGCT       | GGGTGCGCATAACTTCTGTA | CG  |

ENSMUSG00000040680 exon 3 (ORF 1)

|        |               |                                                                           |                                                |    |
|--------|---------------|---------------------------------------------------------------------------|------------------------------------------------|----|
| Mus    | GAACCCAGACGGT | GATGTGCAGCCCTGGTGCTAC                                                     | GTGCCAGAGACAGAAGAGGGCATCTACTGGCGCTACTGTGATATCC | 80 |
| Rattus | GAACCCG       | GACGGCGATGTGCAGCCCTGGTGCTATGTGCCAGAGACAGAAGAAGGCATCTACTGGCGCTACTGTGATATCC | 80                                             |    |
| Cavia  | GAACCCAGAT    | GGTGTGTGCAGCCATGGTGCTATGTGCCAGAGACAGAAGAGGGCATCTACTGGCGTTATTGTGATATCC     | 80                                             |    |
| Homo   | TAACCCAGACGGT | GACGTGCAGCCGTGGTGCTAC                                                     | GTGCCAGAGACAGAAGAGGGCATCTACTGGCGCTACTGTGATATCC | 80 |

  

|        |              |    |
|--------|--------------|----|
| Mus    | CCACATGTCACA | 92 |
| Rattus | CCACGTGTCACA | 92 |
| Cavia  | CCACATGTCACA | 92 |
| Homo   | CCTCTGTCACA  | 92 |

ENSMUSG00000040680\_intron\_2

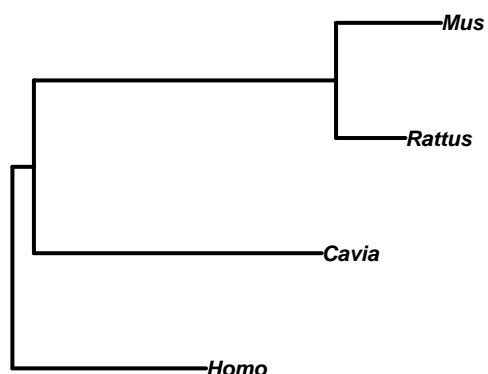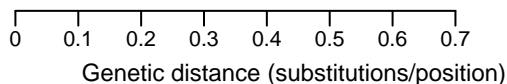



ENSMUSG00000027513 intron 1

Description: Phosphoenolpyruvate carboxykinase, cytosolic (Pck1)

Intron number: 1

Mouse chromosome: 2

Upstream exon length: 224

Downstream exon length: 182

Mouse intron length: 322

Intron alignment length: 443

Total murinae branch length: 0.21718

K\_score: 0.04625

Scaling factor: 0.63141

ENSMUSG00000027513 exon 1 (ORF 0)

|        |                  |            |          |           |          |         |           |          |          |    |
|--------|------------------|------------|----------|-----------|----------|---------|-----------|----------|----------|----|
| Mus    | GCCTGCCCCAGGCAGT | GAGGAAGTTT | GTGGAAAG | GSCAATGCT | CAGCTGTG | CCAGCCG | GGAGTATAT | CCACATCT | GCGATGGG | 80 |
| Rattus | GCCTGCCCCAGGCAGT | GAGGAAGTTT | GTGGAAAG | GSCAATGCT | CAGCTGTG | CCAGCCG | GGAGTATAT | CCACATCT | GCGATGGG | 80 |
| Cavia  | GCCTGCCCCAGGCAGT | GAGGAAGTTT | GTGGAAAG | GSCAATGCT | CAGCTGTG | CCAGCCG | GGAGTATAT | CCACATCT | GCGATGGG | 80 |
| Homo   | GCCTGCCCCAGGCAGT | GAGGAAGTTT | GTGGAAAG | GSCAATGCT | CAGCTGTG | CCAGCCG | GGAGTATAT | CCACATCT | GCGATGGG | 80 |

  

|        |               |         |           |         |           |         |         |          |          |     |
|--------|---------------|---------|-----------|---------|-----------|---------|---------|----------|----------|-----|
| Mus    | TCCGAGGAGGAGT | ACGGGCA | GTGGTGGCC | CACATGC | AGGAGGGGT | GTCATCC | GCAAGCT | GAAGAAAT | TGACAACT | 160 |
| Rattus | TCCGAGGAGGAGT | ACGGGCA | GTGGTGGCC | CACATGC | AGGAGGGGT | GTCATCC | GCAAGCT | GAAGAAAT | TGACAACT | 160 |
| Cavia  | TCCGAGGAGGAGT | ACGGGCA | GTGGTGGCC | CACATGC | AGGAGGGGT | GTCATCC | GCAAGCT | GAAGAAAT | TGACAACT | 160 |
| Homo   | TCCGAGGAGGAGT | ACGGGCA | GTGGTGGCC | CACATGC | AGGAGGGGT | GTCATCC | GCAAGCT | GAAGAAAT | TGACAACT | 160 |

ENSMUSG00000027513 exon 2 (ORF 1)

|        |              |     |         |          |           |          |         |        |              |          |    |
|--------|--------------|-----|---------|----------|-----------|----------|---------|--------|--------------|----------|----|
| Mus    | TTGGCTGGCTCT | CAC | TGACCCD | TGAGATGT | GGCCAGGAT | CGAAAGCA | AGACAGT | CATCAT | CACCCAAGAGCA | GAGAGACA | 80 |
| Rattus | TTGGCTGGCTCT | CAC | TGACCCD | TGAGATGT | GGCCAGGAT | CGAAAGCA | AGACAGT | CATCAT | CACCCAAGAGCA | GAGAGACA | 80 |
| Cavia  | TTGGCTGGCTCT | CAC | TGACCCD | TGAGATGT | GGCCAGGAT | CGAAAGCA | AGACAGT | CATCAT | CACCCAAGAGCA | GAGAGACA | 80 |
| Homo   | TTGGCTGGCTCT | CAC | TGACCCD | TGAGATGT | GGCCAGGAT | CGAAAGCA | AGACAGT | CATCAT | CACCCAAGAGCA | GAGAGACA | 80 |

  

|        |            |         |          |           |     |          |      |         |      |         |        |     |
|--------|------------|---------|----------|-----------|-----|----------|------|---------|------|---------|--------|-----|
| Mus    | CAGTGGCCAT | CCCCAAA | ACTGGCCT | CAGCCAGCT | GGG | CCCTGGAT | GTCG | GAAGAGG | ACTT | GAGAAAG | CATTCA | 160 |
| Rattus | CAGTGGCCAT | CCCCAAA | ACTGGCCT | CAGCCAGCT | GGG | CCCTGGAT | GTCG | GAAGAGG | ACTT | GAGAAAG | CATTCA | 160 |
| Cavia  | CAGTGGCCAT | CCCCAAA | ACTGGCCT | CAGCCAGCT | GGG | CCCTGGAT | GTCG | GAAGAGG | ACTT | GAGAAAG | CATTCA | 160 |
| Homo   | CAGTGGCCAT | CCCCAAA | ACTGGCCT | CAGCCAGCT | GGG | CCCTGGAT | GTCG | GAAGAGG | ACTT | GAGAAAG | CATTCA | 160 |

ENSMUSG00000027513\_intron\_1

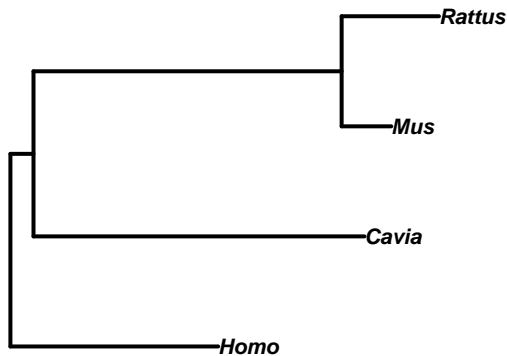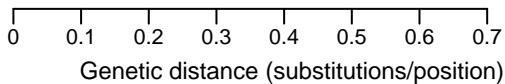

```

Mus      G T G A G T C C C C T C A G C C C T A A C T C T C T G C C C A C A G C C T C . . . . . C T T A A C T A C T T C T T A C G T T . . . . . T G G A G A T G A A G A C C T T . . . G C G G T A G C A 88
Rattus  G T G A G T C C C T T C A G C C C A A A G T C T C T G G C C T A C A G G C T G . . . . . C T C A G C T C T A G C T T C T C G G A G T C . . . . . T G G A G A A T A A G A C C C T T . . . G C A G T A G C A 89
Cavia   G T G A G T T C G . . . . . A T C C T C C C A G C C G T T C T G G T G T T G G T G G . . . . . G G G T G A T G G G A C C A . . . . . A . . . . . A 92
Homo    G T A A G . . . . . C T C G G C C C C G C T G C C T G C C A G C A C C C T G C A G G A G G G C T G C C G T G C T C T G G G A T T G G T G G A G A A A G G T G A A T G A A G G C C T T C G G G T A G T T T C A 106

Mus      A A C A C C T G A G A A G C T T A A G A G A T . . . . . G C C C T G T G A G C T T A G C A T A G C C A G C C . . . . . 137
Rattus  A A C G C C T G A C A A G C T T A G G A G A T C A G T C A G A A T G C A G A C . . . . . A G C C T G T G A G C T T A G C A T A G C C A G C T . . . . . 154
Cavia   A C T G T T T G A A A A G C A G A A G . . . . . A G C C A C A A G C T T C A C A G A G T T G C C G T A C T T A A A T C A G G T G T G T C A C A A A A G C T G . . . . . T C C A 146
Homo    G A C T C T T G A G A A G A T G A A T G C A A T G T C A G A A C C A T A C A G A C T T G A A T T T T G T G A C A T T A G T G G C C A G C C C A A C T T A A A T C A G G T G T G T C A C A A A A G C T G . . . . . T C C A 214

Mus      A C T A G A T T C T G G A T A A C T A T A C A A A G C A A C T C C T T T C C C A G G G C C A G T C A G A G T C T A G C T A A T G T C C A C C T G G T C A A G T C C G T T G T C C T T E T T . . . . . T C . . . . . 236
Rattus  T C T A G A T T C C A G A T A G C C A T G C A A G G C G C C C C T T T C C T A G G G C C A G C T C A T G C T T A G C A A A T G T C C A C C T G G T C A A G T C C G T T G G C T T G C C A T A C C T A A 262
Cavia   A A G T T G A T T C C T G A T A A A A G G A A G G C A G T C C C T G T C T C G G G G C T G C T . . . . . G G T T T G G T G A C T C C T G G T G C T G G C C A G C T G G T T G G C T A T T G C A C T G T G 251
Homo    A A C T A G A T T C C T G A T T A . . . . . A A A A A G G C A G C C C T C T C C T A C A G A C C A G C T C T A G T G G A G T A A A T G T C C A C C T G G C C A T G T C T T A G A T G G T C T G T G T T C A C A C T G A T 323

Mus      . . . . . C G C C A A G G C T T . . . . . G G A A G G A C C T G C C G T G G C C A A G A G A G G T A C A T C C C C A G G A T A C C T T G C T G A A G C A G T C C C T G T G A C T T T T T 319
Rattus  G T A A C A C G G T C A A C G T C C T T G T G T . . . . . C T G C A A G G C G . . . . . G G A A G A G C C T G A G G A G C A A G A G A G G T A C A T C C C A A G G T A C C T T G C T G A A G C A T C C C T G T G A C T T T T T 369
Cavia   G C A G T T G C G C . . . . . C T G C G G G C A G G A A G G C C T G A T T A C A G G A A G T G T C G T T G C T T A T C A G G G C C G C T A A . . . . . T S T G T T T T T G 337
Homo    G G A C T G T T G T A G C G T G C T C A G C A C T . . . . . C T G C T A G G C A T . . . . . G G A A G C A G G T A C T G A A G A G A T G G T G G T G C C G T G C T G T T G C T G A A G G A A G C C T G T G A T T T T T G 432

Mus      C A G 322
Rattus  C A G 372
Cavia   C A G 340
Homo    C A G 435

```

ENSMUSG00000021609 intron 12

Description: Sodium-dependent dopamine transporter (Slc6a3)

Intron number: 12

Mouse chromosome: 13

Upstream exon length: 168

Downstream exon length: 72

Mouse intron length: 1182

Intron alignment length: 2037

Total murinae branch length: 0.18049

K\_score: 0.05343

Scaling factor: 0.63212

ENSMUSG00000021609 exon 12 (ORF 0)

|        |   |   |   |   |   |   |   |   |   |   |   |   |   |   |   |   |   |   |   |   |   |   |   |   |   |   |   |   |   |   |   |   |   |   |   |   |   |   |   |   |   |   |   |   |   |   |   |   |   |   |   |   |   |   |   |   |   |   |   |   |   |   |   |   |   |    |    |   |   |   |   |   |   |   |   |   |   |    |
|--------|---|---|---|---|---|---|---|---|---|---|---|---|---|---|---|---|---|---|---|---|---|---|---|---|---|---|---|---|---|---|---|---|---|---|---|---|---|---|---|---|---|---|---|---|---|---|---|---|---|---|---|---|---|---|---|---|---|---|---|---|---|---|---|---|---|----|----|---|---|---|---|---|---|---|---|---|---|----|
| Mus    | C | G | T | G | G | T | C | A | G | C | A | T | T | G | T | G | A | C | T | T | C | A | G | A | C | C | C | C | C | A | C | A | C | T | A | T | G | G | A | G | C | C | T | A | C | A | T | C | T | T | C | C | A | G | A | C | T | G | G | G | C | C | A | A | T | G  | C  | C | T | G | G | G | C | T | G | G | A | 80 |
| Rattus | C | G | T | G | G | T | C | A | G | C | A | T | T | G | T | G | A | C | T | T | C | A | G | A | C | C | C | C | C | A | C | A | C | T | A | T | G | G | A | G | C | C | T | A | C | A | T | C | T | T | C | C | A | G | A | C | T | G | G | G | C | C | A | A | T | G  | C  | C | T | G | G | G | C | T | G | G | A | 80 |
| Cavia  | T | G | T | G | G | T | C | A | G | C | A | T | T | G | T | G | A | C | T | T | C | A | G | A | C | C | C | C | C | C | A | C | A | C | T | A | T | G | G | A | G | C | C | T | A | C | A | T | C | T | T | C | C | A | G | A | C | T | G | G | G | C | T | G | G | A  | 80 |   |   |   |   |   |   |   |   |   |   |    |
| Homo   | C | G | T | G | G | T | C | A | G | C | A | T | T | G | T | G | A | C | T | T | C | A | G | A | C | C | C | C | C | A | C | A | C | T | A | T | G | G | A | G | C | C | T | A | C | A | T | C | T | T | C | C | A | G | A | C | T | G | G | G | C | T | G | G | A | 80 |    |   |   |   |   |   |   |   |   |   |   |    |

  

|        |   |   |   |   |   |   |   |   |   |   |   |   |   |   |   |   |   |   |   |   |   |   |   |   |   |   |   |   |   |   |   |   |   |   |   |   |   |   |   |   |   |   |   |   |   |   |   |   |   |   |   |   |   |   |   |   |   |   |   |   |   |     |   |     |   |   |   |     |
|--------|---|---|---|---|---|---|---|---|---|---|---|---|---|---|---|---|---|---|---|---|---|---|---|---|---|---|---|---|---|---|---|---|---|---|---|---|---|---|---|---|---|---|---|---|---|---|---|---|---|---|---|---|---|---|---|---|---|---|---|---|---|-----|---|-----|---|---|---|-----|
| Mus    | T | C | A | T | T | G | C | C | A | C | A | T | C | C | T | C | C | A | T | G | G | C | C | A | T | T | T | A | T | G | C | A | C | T | A | T | A | A | G | T | T | C | T | G | C | A | G | C | T | G | C | C | A | G | G | G | T | C | C | T | T | C   | C | G   | A | G | A | 160 |
| Rattus | T | C | A | T | T | G | C | C | A | C | A | T | C | C | T | C | C | A | T | G | G | C | C | A | T | T | T | A | T | G | C | A | C | T | A | T | A | A | G | T | T | C | T | G | C | A | G | C | T | G | C | C | A | G | G | G | T | C | C | G | A | G   | A | 160 |   |   |   |     |
| Cavia  | C | A | G | T | T | G | C | C | A | T | C | C | T | C | C | A | T | G | G | C | C | A | T | T | T | A | T | G | C | A | C | T | A | T | A | A | G | T | T | C | T | G | C | A | G | C | T | G | C | C | A | G | G | G | T | C | C | G | A | G | A | 160 |   |     |   |   |   |     |
| Homo   | T | C | A | T | T | G | C | C | A | T | C | C | T | C | C | A | T | G | G | C | C | A | T | T | T | A | T | G | C | A | C | T | A | T | A | A | G | T | T | C | T | G | C | A | G | C | T | G | C | C | A | G | G | G | T | C | C | G | A | G | A | 160 |   |     |   |   |   |     |

ENSMUSG00000021609 exon 13 (ORF 0)

|        |   |   |   |   |   |   |   |   |   |   |   |   |   |   |   |   |   |   |   |   |   |   |   |   |   |   |   |   |   |   |   |   |   |   |   |   |   |   |   |   |   |   |   |   |   |   |   |   |   |   |   |   |   |   |   |   |   |   |   |   |   |   |   |    |    |    |
|--------|---|---|---|---|---|---|---|---|---|---|---|---|---|---|---|---|---|---|---|---|---|---|---|---|---|---|---|---|---|---|---|---|---|---|---|---|---|---|---|---|---|---|---|---|---|---|---|---|---|---|---|---|---|---|---|---|---|---|---|---|---|---|---|----|----|----|
| Mus    | A | A | A | C | T | G | G | C | C | A | T | G | C | C | A | T | C | A | C | A | C | T | G | A | G | A | A | G | A | C | C | A | T | C | A | G | T | A | G | G | A | C | A | G | A | G | G | G | G | A | G | T | G | C | G | C | C | A | A | T | T | C | A | C  | G  | 72 |
| Rattus | A | A | A | C | T | G | G | C | C | A | T | G | C | C | A | T | C | A | C | A | C | T | G | A | G | A | A | G | A | C | C | A | T | C | A | G | T | A | G | G | A | C | A | G | A | G | G | G | A | G | T | G | C | G | C | C | A | A | T | T | C | A | C | G  | 72 |    |
| Cavia  | A | A | A | C | T | G | G | C | C | A | T | G | C | C | A | T | C | A | C | A | C | T | G | A | G | A | A | G | A | C | C | A | T | C | A | G | T | A | G | G | A | C | A | G | A | G | G | A | G | T | G | C | G | C | C | A | A | T | T | C | A | C | G | 72 |    |    |
| Homo   | A | A | A | C | T | G | G | C | C | A | T | G | C | C | A | T | C | A | C | A | C | T | G | A | G | A | A | G | A | C | C | A | T | C | A | G | T | A | G | G | A | C | A | G | A | G | G | A | G | T | G | C | G | C | C | A | A | T | T | C | A | C | G | 72 |    |    |

ENSMUSG00000021609\_intron\_12

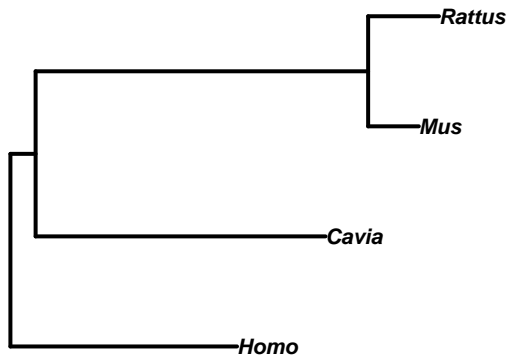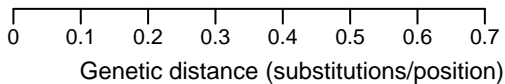





ENSMUSG00000031375 intron 3

Description: Biglycan Precursor (Bgn)

Intron number: 3

Mouse chromosome: X

Upstream exon length: 214

Downstream exon length: 111

Mouse intron length: 561

Intron alignment length: 1009

Total murinae branch length: 0.14172

K\_score: 0.08245

Scaling factor: 0.63676

ENSMUSG00000031375 exon 3 (ORF 0)

|        |                      |                  |                     |                    |         |    |
|--------|----------------------|------------------|---------------------|--------------------|---------|----|
| Mus    | CCTCTGCGGAAGCTGCAAAA | AACTCTACATCTCCAA | GAAACCACTGGTGGAGATT | CCTCCCAACCTGCCAGCT | CCCTGGT | 30 |
| Rattus | CCTCTGCGGAAGCTGCAAAA | AACTCTACATCTCCAA | GAAACCACTGGTGGAGATT | CCTCCCAACCTGCCAGCT | CCCTGGT | 30 |
| Cavia  | CCTCTGCGGAAGCTGCAAAA | AACTCTACATCTCCAA | GAAACCACTGGTGGAGATT | CCTCCCAACCTGCCAGCT | CCCTGGT | 30 |
| Homo   | CCTCTGCGGAAGCTGCAAAA | AACTCTACATCTCCAA | GAAACCACTGGTGGAGATT | CCTCCCAACCTGCCAGCT | CCCTGGT | 30 |

  

|        |     |                   |                   |              |      |           |                |     |   |   |     |
|--------|-----|-------------------|-------------------|--------------|------|-----------|----------------|-----|---|---|-----|
| Mus    | AGA | ACTACGAATCCATGACA | AACCGTATCCGCAAAGT | GCCCAAGGGCGT | GTTT | CAGCGGGCT | CCGGAACATGAACT | GCA | T | G | 160 |
| Rattus | AGA | ACTACGAATCCATGACA | AACCGTATCCGCAAAGT | GCCCAAGGGCGT | GTTT | CAGCGGGCT | CCGGAACATGAACT | GCA | T | G | 160 |
| Cavia  | AGA | ACTACGAATCCATGACA | AACCGTATCCGCAAAGT | GCCCAAGGGCGT | GTTT | CAGCGGGCT | CCGGAACATGAACT | GCA | T | G | 160 |
| Homo   | AGA | ACTACGAATCCATGACA | AACCGTATCCGCAAAGT | GCCCAAGGGCGT | GTTT | CAGCGGGCT | CCGGAACATGAACT | GCA | T | G | 160 |

ENSMUSG00000031375 exon 4 (ORF 2)

|        |                      |                  |        |                   |             |             |   |    |
|--------|----------------------|------------------|--------|-------------------|-------------|-------------|---|----|
| Mus    | AGATGGGCGGGAAATCCCCT | GGAGAACAGTGGCTTT | GAACCA | GGAGCCTTTGATGGCCT | GAAGCTCAACT | TACCTGCGCAT | C | 30 |
| Rattus | AGATGGGCGGGAAATCCCCT | GGAGAACAGTGGCTTT | GAACCA | GGAGCCTTTGATGGCCT | GAAGCTCAACT | TACCTGCGCAT | C | 30 |
| Cavia  | AGATGGGCGGGAAATCCCCT | GGAGAACAGTGGCTTT | GAACCA | GGAGCCTTTGATGGCCT | GAAGCTCAACT | TACCTGCGCAT | C | 30 |
| Homo   | AGATGGGCGGGAAATCCCCT | GGAGAACAGTGGCTTT | GAACCA | GGAGCCTTTGATGGCCT | GAAGCTCAACT | TACCTGCGCAT | C | 30 |

  

|        |                         |          |     |
|--------|-------------------------|----------|-----|
| Mus    | TCAGAGGCCAAGCTCACTGGCAT | CCCCAAAG | 111 |
| Rattus | TCAGAGGCCAAGCTCACTGGCAT | CCCCAAAG | 111 |
| Cavia  | TCAGAGGCCAAGCTCACTGGCAT | CCCCAAAG | 111 |
| Homo   | TCAGAGGCCAAGCTCACTGGCAT | CCCCAAAG | 111 |

ENSMUSG00000031375\_intron\_3

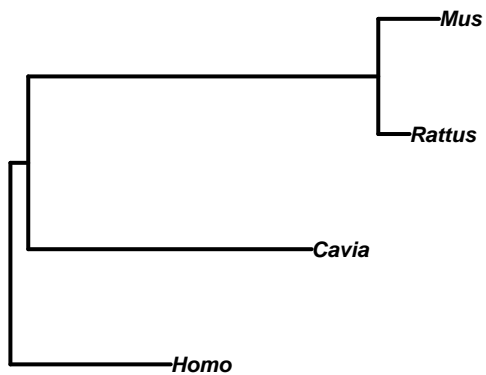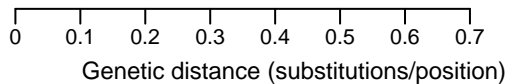



ENSMUSG00000041313 intron 10

Description: High affinity cationic amino acid transporter 1 (Slc7a1)

Intron number: 10

Mouse chromosome: 5

Upstream exon length: 109

Downstream exon length: 104

Mouse intron length: 1346

Intron alignment length: 1783

Total murinae branch length: 0.22903

K\_score: 0.03872

Scaling factor: 0.6375

ENSMUSG00000041313 exon 10 (ORF 0)

|        |                     |                      |                    |                      |     |    |
|--------|---------------------|----------------------|--------------------|----------------------|-----|----|
| Mus    | GTACCCCTTTGTCCCCGTA | CTTCTGTCTTTGAGCATCTT | CCTGAACATCTATCTCAT | GATGCAGCTGGACCAGGGCA | CGT | 80 |
| Rattus | GTACCCCTTTGTCCCCGTA | CTTCTGTCTTTGAGCATCTT | CCTGAACATCTATCTCAT | GATGCAGCTGGACCAGGGCA | CGT | 80 |
| Cavia  | GTGCCCCTTCTTGGCGAGT | GCTGCCCATCTGAGCATTTT | CCTGAACATCTATCTCAT | GATGCAGCTGGACCAGGGCA | CGT | 80 |
| Homo   | GTTCCCTTCCGGCGAGT   | GCTGCCCATCTGAGCATTTT | CCTGAACATCTATCTCAT | GATGCAGCTGGACCAGGGCA | CGT | 80 |

  

|        |                   |              |     |
|--------|-------------------|--------------|-----|
| Mus    | GGTCCGGTTTGCAGTGT | GGATGCTGATAG | 109 |
| Rattus | GGTCCGGTTTGCAGTGT | GGATGCTGATAG | 109 |
| Cavia  | GGTCCGGTTTGCAGTGT | GGATGCTGATAG | 109 |
| Homo   | GGTCCGGTTTGCAGTGT | GGATGCTGATAG | 109 |

ENSMUSG00000041313 exon 11 (ORF 2)

|        |                   |                       |                    |                    |        |    |
|--------|-------------------|-----------------------|--------------------|--------------------|--------|----|
| Mus    | GTTTCACCATCTACTTT | GGTTATGGATCTGGCACAGT  | GAGGAAGCGTCCCTGGCT | GCTGGCCAGGCAAAGACT | CCTGAC | 80 |
| Rattus | GCTTTGCATCTACTTT  | GGCTATGGGCTCTGGCACAGT | GAGGAAGCATCCCTGGCT | GCTGGCCAGGCAAAGACT | CCTGAC | 80 |
| Cavia  | GCTTCATCATCTACTTT | GGCTATGGGCTGTGGCACAGT | GAGGAAGCATCCCTGGCT | GCTGGCCAGGCAAAGACT | CCTGAT | 80 |
| Homo   | GCTTCATCATCTACTTT | GGCTATGGGCTGTGGCACAGT | GAGGAAGCATCCCTGGCT | GCTGGCCAGGCAAAGACT | CCTGAC | 80 |

  

|        |                    |          |     |
|--------|--------------------|----------|-----|
| Mus    | AGCAACTTTGGACCAAGT | GCAAATGA | 104 |
| Rattus | AGCAACTTTGGACCAAGT | GCAAATGA | 104 |
| Cavia  | AGCAACTTTGGACCAAGT | GCAAATGA | 104 |
| Homo   | AGCAACTTTGGACCAAGT | GCAAATGA | 104 |

ENSMUSG00000041313\_intron\_10

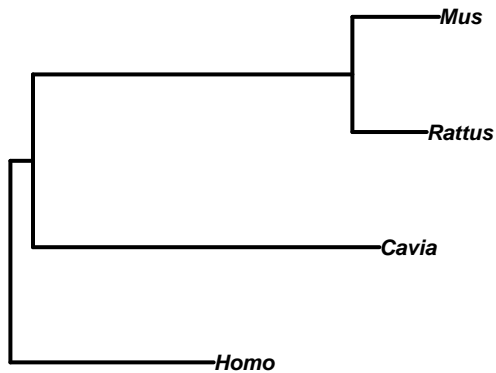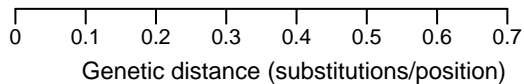



ENSMUSG00000020198 intron 22

Description: AP-3 complex subunit delta-1 (Ap3d1)

Intron number: 22

Mouse chromosome: 10

Upstream exon length: 72

Downstream exon length: 96

Mouse intron length: 388

Intron alignment length: 674

Total murinae branch length: 0.19484

K\_score: 0.08845

Scaling factor: 0.63902

ENSMUSG00000020198 exon 22 (ORF 0)

|        |                        |          |                |          |                       |    |
|--------|------------------------|----------|----------------|----------|-----------------------|----|
| Mus    | GGTGAGGACTTAGACTTCTGGG | -----    | TGTCCACC       | -----    | ACCCACCACTGCTGCTGCCCC | 53 |
| Rattus | GGTGAGGACTTAGACTTCTGGT | -----    | TGTCCACC       | -----    | ACCCACCACTGCTGCTGCCCC | 53 |
| Cavia  | G-----                 | CTTCTGGC | AGATAGCGAGAAGC | TGTCCACC | CAGAAACACAGAA         | 80 |
| Homo   | CTGAGGACCTTGGACTTCTGGC | -----    | TGTCTACC       | -----    | ACCCACCACTGCTGCTGCCCC | 53 |

  

|        |               |               |         |    |
|--------|---------------|---------------|---------|----|
| Mus    | CATTTCCTGCCCC | -----         | GTCCACG | 72 |
| Rattus | CGTCCCTGCCCC  | -----         | ATCTACG | 72 |
| Cavia  | -----         | -----         | GTCCCT  | 67 |
| Homo   | CGCCCCCGCCCC  | CGTTCGATCCACG | -----   | 78 |

ENSMUSG00000020198 exon 23 (ORF 0)

|        |                                                       |                                                                       |                                                                                         |           |    |
|--------|-------------------------------------------------------|-----------------------------------------------------------------------|-----------------------------------------------------------------------------------------|-----------|----|
| Mus    | GAA G A C T T G C T G C A A G C A C T A T C A C C T   | C C C C T A A G G A T G A G T G T G A G G T T C T C A A A G G G G A A | -----                                                                                   | G A G G A | 68 |
| Rattus | G A A G A C T T G C T G C G A G C A T T G T C A C C C | C C C C T A A G G C T G A G T G T G A G G T T C T C A A A G G G G A A | G A G C C C C A G G A C                                                                 | G A G G A | 80 |
| Cavia  | -----                                                 | T C T A C C A C C C C C G C T T G T C A C T G                         | C C C C T                                                                               | -----     | 30 |
| Homo   | -----                                                 | -----                                                                 | G A C G A G T G T G A G G A C G C C A A G A C G G A G C C G C A G G G C G A G G A G G A | -----     | 44 |

  

|        |                              |     |
|--------|------------------------------|-----|
| Mus    | GGACCACGTTGATCATGACCAAGAAAGG | 96  |
| Rattus | GGACCACATGGATCATGACCAAGAAAGG | 108 |
| Cavia  | -----                        | 48  |
| Homo   | CGATGCCGAGGGGCAAGACCAAGACAAG | 72  |

ENSMUSG00000020198\_intron\_22

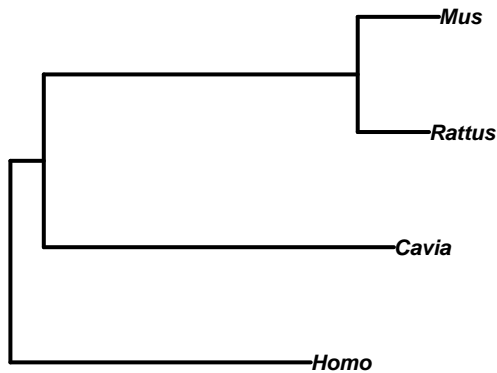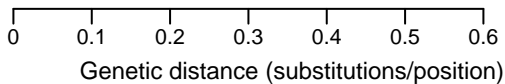

```

Mus      G T A A . . . . . 4
Rattus  G T A A . . . . . 4
Cavia   G T A A A T G A A G A C A T C C C C C G T A G A A A G A A G A G C A A A A A A A A A A A A A G C A C A A A G A A A G A G A G A G A A A G A G A G G A A G A A G G A A A G G A A A G G A A A 110
Homo    G T A A C A G A C T G G C A G C G G G A . . . . . 22

Mus      . . . . . G T G C C T G C T C C G T G T G T C T C A G G T T C T C A T T T G T A . . . . . T C C C A G G A G C C A G C G 56
Rattus  . . . . . G T G C C T G C T C T G T A T G T C T T G G C A G G T C A C C T T G T A C A T T T C C C A G G A G C C A G G C 50
Cavia   . . . . . G T G C C G C C T G C T G T C T G C A G G C C C T G G G . . . . . G T T T C A G G A G C C A G A G 211
Homo    . . . . . G T G C C A C C C T C G G T G T C T G C A G A C G T C A . . . . . T A C C T G C C A C T C A G G 66

Mus      . . . . . A A T G C C A G G C A . T C C C T G C A A T C A G A G C C C A G A C A G A A G T G C C A G T A A A T G A C T G G A G T C A A G C C T C G T G G C T G C C C T T C T G T A C T T T G . . . . . T G C T C T A T G C T G 158
Rattus  . . . . . A G T G C C A G G C A T C C C C T G C A G T C A G A G C C A C A C A T A . . . . . C C T G G T T G G C T G C C T T C T G T A C T T T G . . . . . T G G T C T G T G T C T G 137
Cavia   . . . . . C G G G C C A C G T G T C C C C A T G . . . . . G T G C T G C G C A G A T T G G C G T C C C A G T C A G T G A G C C 270
Homo    . . . . . A A G A G C C C T G G G T C T C C T G A G G . . . . . C C C T G T C T C T C G G G T G A G C A C G T G . . . . . C A . . . . . 217

Mus      . . . . . C T A T C C T G T G A G A C T C T . . . . . G T G C T T G C C A G G C T T C A G . . . . . 193
Rattus  . . . . . C T G T C C T A T G G G A C T C T . . . . . G T G C T T G C C A G A G C T C A G . . . . . 172
Cavia   . . . . . G T G T C C T G G G G G C C A T G T G T A G G C T G T C A C A G A C A T T C T G G C C T C C A T G T A G G C T G T C A C A C A T G C G G G C A G A G C . . . . . A G C C 354
Homo    . . . . . C C T G T G G G A C C A . . . . . G C A C T G A G T G G A C C G G G G T C A T G C T C C G G G T C C C A G T G G C C 174

Mus      . . . . . T G A G G C A G A G G G T A C C A G C A G G A G . . . . . G T T T G T C C C A A G G . . . . . C A T C C C T T G G A G A T G T C C C A G G C C T C A . . . . . G T G G A C A G C A C T G 277
Rattus  . . . . . T G A G G T A G A G G G C T G G C A G C A G A T T . . . . . G T C T G T C C C A A G G . . . . . C A T T C G C T G G A G T A T G T C C C A G C C T G A G . . . . . C A G A C A C A G G A C T G 256
Cavia   . . . . . A G C C G G G G T G C A G G G T A G C C A G G A C A A G G G G C A G C C C T G T A G G C C A G A G . . . . . C T C A C G T G C C C C C T T C C C T T C A G . . . . . 434
Homo    . . . . . A A G C A G G G G C A G G G A A G G G A G G A C A G C C A G G C . . . . . C T C T G T G C T C A C A G G C T C C C T G T G A C T G G G A G G C A C T G T G G C C T T C A G G C A G G C A A G C T G 280

Mus      . . . . . G T T A T G T G G G A T C A A A G T T C T C T A C T G C T C C T A A A G C T G G A A C C C A T G A A C A G T C T G G . . . . . A A T A C C A C T A C A C C C C T C C C A A A A G C T G A C T C T G A C C T C C 379
Rattus  . . . . . G T T A C G T G G G A T T C A G A T T C T C T T A C T G C T C C T A A A G C A G G A A G C C C T G A A C A T C A G G . . . . . A A T A C C A C T G C A C G T C C C C T G A A A A C T G A C C T G A C C T T C C 356
Cavia   . . . . . A G G C T C T G T G C A T G T A G G C T G T C T G G T T T A G C C G A G G A C C T G A T T T C T G G C . . . . . A T A G C C C A A G C C T C C G T C C G T C G A G C G G C A G C C A G T G T C T A G C T G 481
Homo    . . . . . A G G C T C T G T G C A T G T A G G C T G T C T G G G C T G A A G T G G A C T G G G C C C C T A T T G C C C A G G A T A G A G C C C A A G C C C T C C G T C C G T C C G T C G A G C G G C A G C C A G T G T C T A G C T G 390

Mus      T G A T A C . . . . . A G 388
Rattus  C A A C T G C . . . . . A G 365
Cavia   . . . . . T G 483
Homo    T C A C T A C C C C G A A G 404

```

ENSMUSG00000038644 intron 18

Description: DNA polymerase delta catalytic subunit (Pold1)

Intron number: 18

Mouse chromosome: 7

Upstream exon length: 138

Downstream exon length: 176

Mouse intron length: 506

Intron alignment length: 999

Total murinae branch length: 0.24106

K\_score: 0.04255

Scaling factor: 0.64265

ENSMUSG00000038644 exon 18 (ORF 0)

|        |                                                                                   |    |
|--------|-----------------------------------------------------------------------------------|----|
| Mus    | GTAGTCTACGGTGAACAGGACTCTGTGATGTGCCCGTTTGGCGTCTCCTCTGTGGCTGAAGCAATGTCTCTGGGGCGGGA  | 80 |
| Rattus | GTGGTCTACGGTGAACACTGACTCTGTGATGTGCCCGATTGGTGTCTCCTCTGTGGCTGAAGCAATGTCTCTGGGGCGGGA | 80 |
| Cavia  | GTGGTGTATGGTGAACACTGACTCTGTGATGTGCCCGATTGGCGTCTCCTCTGTGGCTGAAGCGATGGCTCTGGGGCGGGA | 80 |
| Homo   | GTGGTGTATGGTGAACACTGACTCTGTGATGTGCCCGATTGGCGTCTCCTCTGTGGCTGAAGCGATGGCTCTGGGGCGGGA | 80 |

  

|        |                                                                |     |
|--------|----------------------------------------------------------------|-----|
| Mus    | GGCTGCAAACTGGGTATCCAGTCACTTCCCATCACCCATCCGGCTGGAGTTCGAGAAAG    | 138 |
| Rattus | GGCTGCAAACTGGGTATCCAGTCACTTCCCATCACCCATCCGGCTGGAGTTCGAGAAAG    | 138 |
| Cavia  | GGCCGCGGAGCTGGGTATCCAGTCACTTCCCCTCCGCCCCATCCGGCTGGAGTTCGAGAAAG | 138 |
| Homo   | GGCCGCGGAGCTGGGTATCCAGTCACTTCCCCTCCGCCCCATCCGGCTGGAGTTCGAGAAAG | 138 |

ENSMUSG00000038644 exon 19 (ORF 0)

|        |                                                                                   |    |
|--------|-----------------------------------------------------------------------------------|----|
| Mus    | GTTTACTTCCCATACCTGCTCATCAGCAAGAAGCGCTATGCTGGCCTGCTCTTCTCCTCCCGCTCTGATGCCCATGACAA  | 80 |
| Rattus | GTTTACTTCCCATACCTGCTCATCAGCAAGAAGCGCTATGCGGGCCTACTCTTCTCCTCCCGCTCTGATGCCCATGACAA  | 80 |
| Cavia  | GTTTACTTCCCATACCTGCTCATCAGCAAGAAGCGCTATGCGGGCCTGCTCTTCTCCTCCCGGCTCCGACAGCCACGACCG | 80 |
| Homo   | GTTTACTTCCCATACCTGCTTATCAGCAAGAAGCGCTATGCGGGCCTGCTCTTCTCCTCCCGGCTCCGACAGCCACGACCG | 80 |

  

|        |                                                                                  |     |
|--------|----------------------------------------------------------------------------------|-----|
| Mus    | AATGGACTGCAAGGGCCTGGAGGCTGTGCGCAGGSAACAAGTGTCCCTGGTGGCCAAACCTCTTACATCCTCTCTGGCC  | 160 |
| Rattus | AATGGACTGCAAGGGCCTGGAGGCTGTGCGCAGGSAACAAGTGTCCCTGGTGGCCAAACCTCTTACATCCTCTCTGGCC  | 160 |
| Cavia  | CATGGACTGCAAGGGCCTGGAGGCTGTGCGCAGGSAACAAGTGTCCCTCGTGGCCAAACCTGGTCACTGCCTCACTGGCC | 160 |
| Homo   | CATGGACTGCAAGGGCCTGGAGGCTGTGCGCAGGSAACAAGTGTCCCTCGTGGCCAAACCTGGTCACTGCCTCACTGGCC | 160 |

ENSMUSG00000038644\_intron\_18

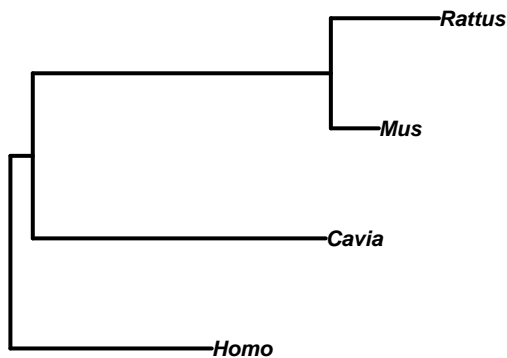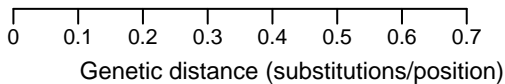

```

Mus      G T G C G T G . . . . . C A T C C T C T C 16
Rattus  G T G C G T G . . . . . T G T C C C T G 16
Cavia   G T C T G G G . . . . . G G T T T C C G C T G 24
Homo    G T C G G T G G T G G G T C A G G G G C T G C A T T T A G G T G C C T C A T C A G G G T G T C C C G T T C T T T G G G T T C A C A A A A G C C A C A G T G T G A A G G G A T T G C C T G G T T A 110

Mus      T A C T C A G C T C A G T G G A G A C A T T A G G G G T C T T A T C A A T T A G T G A T G T C T C C T A . . . . . T G A C A G T A C . . . . . A G T A G T G T G G G C T 92
Rattus  T A C T T G G T C A G T G G A G A T T A T T A G G G G T G T T A T A C A T T A G C A T G A T G T C T T A C T T A G T T G C A T T C C T C A G A G G C C A A C A G T G C . . . . . A G T A G T G T G G G G T 114
Cavia   A T T G C C C C A C A G G G A G G G C A C T G G G T . . . . . G G G A T C C C C A A G T G C T . . . . . G A T G T C T T C G G T G 94
Homo    G A T T C T C C T C A G G C T G G G G C T T G G T T . . . . . G G G A G C C T C C A A G G C C T T G G C T T T G T T A C C C T G A T G C A T C T G T T C T T T G A A A C C C T T C G G T G T 207

Mus      C C C A G G C T C G G A G T C T T G C A G T T T C T G G G T T G T A . . . . . G C T G A G C C C C T C T T T G C A A A C C A G T G G T A C A T 162
Rattus  C C C T A G C C T G G A A G C C T T G C A G T G T T C T G G G T C T A . . . . . G C T G A G C C C T C T T T G A T T G A T T G C A T G T C . . . . . 178
Cavia   C C C A G G T A T T C A G T . . . . . C A G T C C C C C A G G C C T C T . . . . . C T C C T C A G G G T C A G G A C C T A T G C C T T G G G T C C T G A G . . . . . 155
Homo    C C C T G G T T T G A G G T G T C A C A G T G T C C T G G T T T G A G G T T C C C A G T A C C T G T C A G A T G T G G A G C T G C C T C C A C G C A G G A C C T G A T . . . . . G G G G T C C A C 307

Mus      T T T G A T C T G T C G A T G T A G T G G C T C C A G T T C T C C C A G A A G C T C A A A C A T G A C A C . . . . . 220
Rattus  T G T G C T C T G G G T G C T G A C A T T C C T C C A G T C C T C A C C A A T C C T C . . . . . G A C A C . . . . . 230
Cavia   T T T G G G T C A G A C . . . . . G A T T G C C C C T G C C C T C T G A G T T C C C A G T A C C T G T C A G A T G T G G A G C T G C C T C C A C G C A G G A C C T G A T . . . . . 214
Homo    G T T A G A C T C T G A C . . . . . G A T T G C C C C T G C C C T C T G A G T G C G G C A C A C T T G G T G C C A G A A A C C T G C A C C A T A T T T T C T T T T G A A G A G T C T G G G T C T C G C T C T G T C 412

Mus      . . . . . C C T G C C T T C . . . . . 230
Rattus  . . . . . C C T G G C T G C . . . . . 240
Cavia   G C C C A G G C T G G A G T G C A G T G G C G A T T C A C A G G G G G C C A G C C C A G G C C A G G A G G C T T C A T T C A A C C C A C C T T C . . . . . 267
Homo    G C C C A G G C T G G A G T G C A G T G G C G A T T C A C A G G G G G C C A G C C A A G T C C T G G C C T T G G C C T C T G A G C C G C C A C G C C C A G T T C T C A C A 522

Mus      . . . . . T C A C C A G G C T A T . . . . . C T C A G C T C A G G G C T C A C . . . . . T T G T C C T G 270
Rattus  . . . . . T C A T C C A G G C C T T . . . . . C T C A G C T C A G G A C C A G . . . . . T T G A T C C T G 280
Cavia   . . . . . T T C C C A G G C T A . . . . . C A T C C A C C A G T C A G G G C C T A G G G T G T G G G C C T T C A 322
Homo    C T G T A C T G T T C C G G T G G C T T A C G G T C T C T C G T G C C A G G C C T T G G A C T T G G A G C C T C G C A G A G T G G G C A G G T C T C G C T C A G G G C A G . . . . . C C A G C C T A G 624

Mus      . . . . . C T C T T C C A T G G C T C C A A G A C T T T A C A G T G T C A C C T G T C G G A T T C A T A A T T C G G G G C C A G G C . . . . . 337
Rattus  . . . . . T C G C C T C C A A G G G T G A A G G C T T T A T A G T G T C A C C T G T C G G T T T C A T A A T C A G G G G C C A G G T . . . . . C 347
Cavia   T T T C T C T C T C T T C A T G G G A T G C T T A T C A C T C C C T G T C G G A T C I C A T G T T T A G G G A C T A T C T G G A T T T A C C A G T C T C T G T T C A G A T T G G G G T C T C T G G T C T 734
Homo    T T T C T C T C T C T T C A T G G G A T G C T T A T C A C A C T C C C T G T C G G A T C I C A T G T T T A G G G A C T A T C T G G A T T T A C C A G T C T C T G T T C A G A T T G G G G T C T C T G G T C T 734

Mus      T A G G C C T A T G G C A T T A T G T C A G T G G G T T C T G G G T . . . . . G C T G G A G A T G C T G G C C T C T T G G A T T C A . . . . . 405
Rattus  T G G C C T G T G C C A T T G T G T C A G T G G G T T C T G G G T . . . . . A G T G G A G A A T C T G G A C C T T C T T A G G A T T C A T T T C A C A 422
Cavia   . . . . . G G A C C T G G C A . . . . . G G T G C A G T C A G G A A C C A C C T T A G C T C C C T C T C C A T C . . . . . G G C T C A G C T C C C T G A G T G T C C A G G C T G 442
Homo    G G G G C T C T G C C A T T C C . . . . . G A G G G C C T C A G G A C C A C T T C C A G C C A T A G A G T G T C T C G G T C C A T C C C A C A G G C T A G G G C A G G G C T C . . . . . A T G T C T C A A A C T G 838

Mus      . . . . . T T C C T T G C C T G T T G T T T C C . . . . . T G G T C T G G G A T T C G G G C C G G A A G A A T C T G C A C A G G C C A T G G A G G A A T G T G C A C A G G C T C C G C C C A T G G G T 497
Rattus  A G G T C A A G G G T C C T T G C C T G C C G T T C T G T T T C T . . . . . G A T T G G G T C T C A G G A T T C A G G C T G A A G G A A A G T G C A G G T G C T . . . . . T A C C A C C C A T G G G T 511
Cavia   T G T T T G G G G C C T T G C C T G C G T T T C T G G A A A G T C T C A G G A T G G G A C . . . . . G A A C C C A T T C T . . . . . G A G G G C T T G C C T G C C T G 534
Homo    G T C T . . . . . G G G A C C T G T C T A C C . . . . . T T C A G T T T C G G G G G C T T C C A G A T T G G G C T . . . . . T G G G C T G C T A G G C T . . . . . C A G G G C T T T G G C A T G G G T 926

Mus      C C T T T G C A G 506
Rattus  C C T T T G C A G 520
Cavia   C C C T C C C A G 543
Homo    C C C T C C C A G 935

```



ENSMUSG00000035051 intron 19

Description: Putative ATP-dependent RNA helicase DHX57 (Dhx57)

Intron number: 19

Mouse chromosome: 17

Upstream exon length: 135

Downstream exon length: 75

Mouse intron length: 1087

Intron alignment length: 2221

Total murinae branch length: 0.29213

K\_score: 0.06477

Scaling factor: 0.6434

ENSMUSG00000035051 exon 19 (ORF 0)

|        |                                                                                    |    |
|--------|------------------------------------------------------------------------------------|----|
| Mus    | GAAATGGCCAGCCTCAAACGACAATTCACTGAACTGCTCTCCGACATAGGGTTTTGTCAAAGAAAGGACTCCGAGCAAAAGA | 80 |
| Rattus | GAAATGGCCAGCCTCAAACGCAATTCACTGAACTGCTCTCCGATATAGGGTTTTGTCAAAGAAAGGACTCCGAGCAAAAGA  | 80 |
| Cavia  | GAAATGGCCAGCCTCAAACGACAATTCACTGAACTGTTATCGATATAGGGTTTTGTAAAGGAAAGGACTCAGAGCAAGAGA  | 80 |
| Homo   | GAAATGGCCAGCCTCAAACGACAATTCACTGAACTGTTATCGATATAGGGTTTTGTAAAGGAAAGGACTCAGAGCAAGAGA  | 80 |

  

|        |                                                          |     |
|--------|----------------------------------------------------------|-----|
| Mus    | AATTGAAAAACGAGCCCAAGGAGGAGATGGTGTCTGGATGCCACAGGAGAGGAG   | 135 |
| Rattus | GATTGAAAAAGAGA GCCCAAGGAGGAGATGGTGTCTGGATGCCACAGGAGAGGAG | 135 |
| Cavia  | AATTGAGAAAAAGGCCCAAGGAGGAGATGGTGTCTGGATGCCACAGGAGAGGAG   | 135 |
| Homo   | AATTGAGAAAAAGGCCCAAGGAGGAGATGGTGTCTGGATGCCACAGGAGAGGAG   | 135 |

ENSMUSG00000035051 exon 20 (ORF 0)

|        |                                                                               |    |
|--------|-------------------------------------------------------------------------------|----|
| Mus    | GCTAACACAAATGCTGAGAACCCTAAGCTGATATCAGCAGTGCTGTGTGCCGCTCTGTATCCAAACGTAGTACAG   | 75 |
| Rattus | GCTAACACAAATGCTGAGAACCCTAAGCTGATATCAGCAGTGCTGTGTGCCGCTCTGTATCCAAATGTAGTACAG   | 75 |
| Cavia  | GCAAACCTCTAATGCAAGAGAACCCTAAGCTGATATCAGCAGTGCTGTGTGCTGCTCTGTATCCAAATGTAGTACAG | 75 |
| Homo   | GCAAACCTCAAATGCTGAGAACCCTAAGCTGATATCAGCAATGCTGTGTGCTGCTCTGTATCCAAATGTAGTACAG  | 75 |

ENSMUSG00000035051\_intron\_19

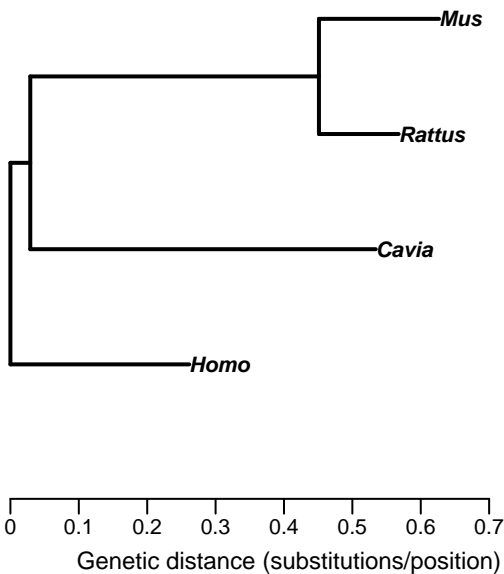



ENSMUSG00000026272 intron 10

Description: Serine--pyruvate aminotransferase, mitochondrial Precursor (Agxt)  
 Intron number: 10  
 Mouse chromosome: 1  
 Upstream exon length: 129  
 Downstream exon length: 108  
 Mouse intron length: 420  
 Intron alignment length: 721  
 Total murinae branch length: 0.15391  
 K\_score: 0.0732  
 Scaling factor: 0.64431

ENSMUSG00000026272 exon 10 (ORF 0)

|        |                                  |                    |                   |          |         |    |
|--------|----------------------------------|--------------------|-------------------|----------|---------|----|
| Mus    | GAAATCCGGCTACCGACAATCACCAACCGTGA | CTGTGCCTGGCGGCTACA | ACTGGAGGGGACATCGT | CAGCTATG | TGCTGGA | 80 |
| Rattus | GAAATCCGGCTACCGACAATCACCAACCGTGA | CTGTGCCTGGCGGCTACA | ACTGGAGGGGACATCGT | CAGCTACG | TGCTGGA | 80 |
| Cavia  | GAAATCCGGCTACCGACAATCACCAACCGTGA | CTGTGCCTGGCGGCTACA | ACTGGAGGGGACATCGT | CAGCTACG | TGCTGGA | 80 |
| Homo   | GCGCTCCGGCTTCCGACAGTCAACCACTGTG  | CTGTGCCTGGCGGCTACA | ACTGGAGGAGACATCGT | CAGCTACG | TGCTGGA | 80 |

  

|        |                                     |                 |     |
|--------|-------------------------------------|-----------------|-----|
| Mus    | CCACTTCAGCATTGAAATCTCTGGGGGTCTTGGG  | CCACTGAGGAGAGG  | 129 |
| Rattus | CCACTTCAGCATTGAAATCTCTGGGGGTCTTGGG  | CCACTGAGGATTAAG | 129 |
| Cavia  | CTCTCTTCAGCATTGAAATCTCTGGGGGTCTTGGG | CCCTGGGGAAG     | 129 |
| Homo   | CCACTTCAGCATTGAAATCTCTGGGGGTCTTGGG  | CCACTGGGGAAG    | 129 |

ENSMUSG00000026272 exon 11 (ORF 0)

|        |                                      |                 |                            |    |
|--------|--------------------------------------|-----------------|----------------------------|----|
| Mus    | GTGCTACGGATTGGCCTCCTGGGCTACAACGCCACC | CTGAGAATGTGGACC | GTGGCCGAGGCCCTGAGGGAGGCCCT | 80 |
| Rattus | GTGCTGCGGATTGGCCTCCTGGGCTACAACGCCACC | AGAGAATGTGGACC  | GTGGCCGAGGCCCTGAGGGAGGCCCT | 80 |
| Cavia  | GTGCTGCGGATTGGCCTCCTGGGCTACAACGCCACC | AGAGAATGTGGACC  | GTGGCCGAGGCCCTGAGGGAGGCCCT | 80 |
| Homo   | GTGCTGCGGATTGGCCTCCTGGGCTACAACGCCACC | AGAGAATGTGGACC  | GTGGCCGAGGCCCTGAGGGAGGCCCT | 80 |

  

|        |                                |     |
|--------|--------------------------------|-----|
| Mus    | GCAGCATTGTCCTAAGAAAGTTGTGA     | 108 |
| Rattus | GCAACATTGTCCTAAGAAATTAATTTGTGA | 108 |
| Cavia  | GCAGCGCTGTCCTCGGTGACAGGCTGTGA  | 108 |
| Homo   | GCAGCACTGTCCTCAGAAAGAAAGCTGTGA | 108 |

ENSMUSG00000026272\_intron\_10

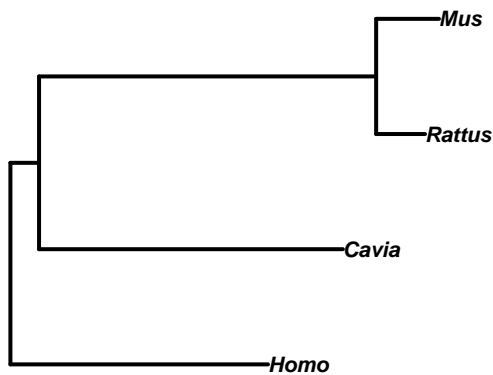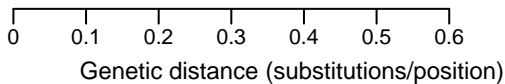

Mus GTGAGGACCG ..... TCTGGGAAGCCA ..... GGCTTTTAAACCAGAG ..... GCACTAGGCA CCCCTCCCC TATCAGTCC 71  
Rattus GTGAGGAGGG ..... TCTGGAAAGGG ..... GGCTTTGTAACCAGAG ..... GCACTAGACA ..... TAGTCACTCC 61  
Cavia GTGAGAAATGGAGCAATCGCAAGAGCAGGGCCAGCC TGCAGCAATC ..... CCTCTGAGACAGAG ..... GCACTGGCA ..... 75  
Homo GTGASAGGGAAGCGCTTGAAGGCG ..... TTTTGGAGAAAGCAAAACCCGGCA GCGCTCTGAGCAGGACTGTGCAGCAGGTG ..... 78

Mus TGC TGCACA CCCA TCTGTGTGGGTCACTGCAGGGCCAAAGG GCATGAGCA CCTCAAATAGAATAT CCTCAG ..... 145  
Rattus TGT TGCAGA AGCC CATGTGTGGGTCACTGCAGGGCCAAAGCA GCATGATGGCTTCAAATAGAATAGGTCAG ..... 135  
Cavia ..... GGCACATGCAG ..... 86  
Homo ..... CAGGGGAAGCCGGGCTATCCGAAAGCCCAAGATTGCAGAGCCCTCCAGAAAGGCCCACTCTCCAAAGGGTATCCAGTAAAGCGTATCCTGTGCCCCCTGC 178

Mus CCGTCTCCACCAGAGCTGGGAGGTCACACATCACCTTTACAGGTCACACTCTGA ..... 199  
Rattus CCTTCTCCACCAGAGGAGGGGCTGCACATCAGCTTTACAGGTCACACTCTGA ..... 189  
Cavia TGCAGCCCTTTTCTGGGGGAGTGCCAGAGGCTTTTCTCTGCCACTTGGAA TGGGCTTCTCCCA TCCCTCGGCTCTG ..... GGAAACCTCAGGCC 185  
Homo TCCAGCCCAAGCCACTGAGGCTCCAGGCTTTATGATCCACTGGAA CATCTTCTTCCCTGTGACAGAGCCTGGAACCAAGGCC GGAAAGCCGACGCC 287

Mus ..... GCCTGAGTGACCTCCCTGG ..... TCGTACCCTGAACCTCTATGTTTAGGTAAGTGGGAGGGCTGCCTCTGA ..... 271  
Rattus ..... GTCTGAGTGACCTCCCTGG ..... CTGTACCCTGAACCTCTATGTTTAGGTAAGTGGGAGGGCTGCCTCTGA ..... 261  
Cavia GGTCTCAAAAGACTCTATCAGGCCAGGCATGCTGAGAGACCTTCTTGG ..... GCACTGGGCTGGCTTTCTGCA ..... 256  
Homo GGCTCTGGCTGTGTCTCTGAG - TGGCASTGGGAGGAACTTCACTGGACCACCTGTCTTCCCGTGTGGCTGCGGCTCCAGAGGAGGAGCC TGGCTG CCTGGG 395

Mus ..... CCGTGTGTGGCATGCATGAGG ..... GAACCTCTCTTCTGCATAGCAGATGGATGCTGATCCCATGTGATAAATACCC TACCTAACCAAGCTCCTAT 366  
Rattus ..... TCTGTGTGGCATGCATGAGG ..... GAACCTCTCTTCTGCATAGCAGATGGATGCTGATCCCATGTGATAAATACCC - GCTAACCAAG ..... 347  
Cavia ..... CTCTGTGCATAGTGAAGG ..... CAGGCTAGCTTAGGCTCATGGCTC ..... 300  
Homo TGCTCAAGGGCCCCCTCTGTGAGCTGGCAAGGCTGTCAACTCCCTCATGAGCGTGGTGGCTGCTCAGCTGAGGCCATCCTGCTCTGGCCAGCTGTGG 505

Mus CAGA - - - CAAAGAGGCTGCACACAGCGGCTGACATCTGCA TGTGCA GCCTACCAAG 420  
Rattus - - - - - AGGCTGAGACAG - GCTGACTCTGCTGTTGCA TCCCTACCAAG 390  
Cavia - - - - - CCAGCATCTGCTGCTTGTGCCCAACCAAG 329  
Homo TCAGGGTCAGGCACCTGCCAGCGGGAAGGCTGAGCTGAGCCGCTGTGCGCCCAAG 563



Mus Rattus Cavia Homo  
GTAGGTGAATAGA...CTTCGTCAAGCCAGAGGC...GGCA...GGCTGCTCTCACTGCTCTGGGTAG...GGCAGGGCCAGAA...AGTGAGCTTA 83  
GTAGGTGGATTGA...CTTCGTCAA...GTCTCAGGGCTGCTCTGGCTCTGGGTAG...GGCAGGGCCAGAA...AGTGAGCTTA 76  
GTAGGTGGCAAA...CATAGGCTCCCTTAAAGCC...AAGGGCCGGCCTGCTCTGGCTCTGGGTAG...GGCAGGGCCAGAA...AGTGAGCTTA 82  
GTAGGTGGCAAC...GGAAAGCCCTCTGAGGC...AAGATGAGGCTCACTGCTCTGGCTCTGGGTAG...GGCAGGGCCAGAA...AGTGAGCTTA 105  
Mus Rattus Cavia Homo  
GTAGTGCCTGTTGGTGAAGGGCAGGAATGGA...AGTCTTGGCTCTCTTCTAACACTCTGAATGATGCCAAGGAGTCTGCT 165  
ATGGTCACTTGGTGAAGGGTGGCAATGG...AGTCTTGGCTCTCTTCTAACACTCTGAATGATGCCAAGGAGTCTGCT 156  
GAGACTCCAGCAGGAAACCAAGAGGGGTTGAGGTTAAAGTGTCTGGAAAGGGTATCCCTGGTTCAGCGAGCTCTGTGCACTCTGTGATGCCAAGGAGTCTGCT 192  
GAGGCACTAGCAAAAGAGGGCAGGAATGAGCTCTGCTG...GGAAAGGGCTCTCTCTGGTTCAGCGAGCTCTGTGATGCCAAGGAGTCTGCT 211  
Mus Rattus Cavia Homo  
TCCCTTGAAGGAAAGAGCTACTGATTCTAGCTTCTAGATGAGCTGCCACAGTGTCTGGTTCCTCCAGAAICCATAGCAAAGCTTATGCTCTGACCACTC 273  
TCCATGAGAAAGAGAGCTACTGATTCTAGCTTCTAGATGAGCTGCCACAGTGTCTGGTTCCTCCAGAAICCATAGCAAAGCTTATGCTCTGACCACTC 264  
TCTATGAGAAAGAGAGCTACTGATTCTAGCTTCTAGATGAGCTGCCACAGTGTCTGGTTCCTCCAGAAICCATAGCAAAGCTTATGCTCTGACCACTC 290  
TCCGACTTAAACAGAGAGCTCTGCTCTGCTGGTTCAGTGTGATGCCAAGGAGTCTGCTGAGGCTTACCAGGGAGCACTAGAGAGCTTCCCTC 321  
Mus Rattus Cavia Homo  
CCACAGCTGCCAGAGACAGGCTCACTCTCGA...GGCACTTTCAGCTTTTCTCATCAGAGCTGCACACACCAGCAAGCTCAGCGGGGCATTCCCTACTCCTTCA 380  
CCACAGCTGCCAGAGAGAGGCTCACTCTCGA...GGCTTCTTCAAGCTTTTCTCATCAGAGCTGCACACACCAGCAAGGCTTACCTGGGACATTCCCTACTCCTTCA 373  
CTCAGCTGCCAGAGAGAGGAGGCAAGGTCAGGTCAG...GGGATTTCTCAGCTTTTCTCATCAGAGCTGCACACACCAGCAAGGCTTACCTGGGACATTCCCTACTCCTTCA 359  
CTTACAGCTCCATGGCAGGACTCAGGGCTCAG...GGGATTTCTCAGCTTTTCTCATCAGAGCTGCACACACCAGCAAGGCTTACCTGGGACATTCCCTACTCCTTCA 381  
Mus Rattus Cavia Homo  
CATAGTCCAGAGACATGAGTATGCCCACTCATGGTGTGAGCTTACCTCTTCCCTTACCTTCCATCCCAAGCA...CATGGGTTTTCCCCAGAAACATGTTGAT 453  
CTTGGTCCAGAGACATGAGTATGCCCACTCATGGTGTGAGCTTACCTCTTCCCTTACCTTCCATCCCAAGCA...CATGGGTTTTCCCCAGAAACATGTTGAT 482  
CTTGGTCCAGAGACATGAGTATGCCCACTCATGGTGTGAGCTTACCTCTTCCCTTACCTTCCATCCCAAGCA...CATGGGTTTTCCCCAGAAACATGTTGAT 416  
CTTGGTCCAGAGACATGAGTATGCCCACTCATGGTGTGAGCTTACCTCTTCCCTTACCTTCCATCCCAAGCA...CATGGGTTTTCCCCAGAAACATGTTGAT 453  
Mus Rattus Cavia Homo  
CAGTATTTCTTTCATCACTATTAAATAATTAATAGTTTAAAGAAAGGCTTTCATTTTGGATCA...GGTCTGAGAGAGTACATGATAGCATGAAAGAAAGAAACA 593  
TGGTATCTTCTTTCATCACTATTAAATAATTAATAGTTTAAAGAAAGGCTTTCATTTTGGATCA...GGTCTGAGAGAGTACATGATAGCATGAAAGAAAGAAACA 585  
TGGTATCTTCTTTCATCACTATTAAATAATTAATAGTTTAAAGAAAGGCTTTCATTTTGGATCA...GGTCTGAGAGAGTACATGATAGCATGAAAGAAAGAAACA 416  
TGGTATCTTCTTTCATCACTATTAAATAATTAATAGTTTAAAGAAAGGCTTTCATTTTGGATCA...GGTCTGAGAGAGTACATGATAGCATGAAAGAAAGAAACA 453  
Mus Rattus Cavia Homo  
TCCAGATGTTCAAGAGGTAAGAAATGTACAGCCAGGCACTCTCAC...AGATCACTGGACAGGAAAGCAGCTT...GAGCTTCCAGGGCAGCTGAGCTG 689  
GTAGAGTTCAAGAGGTAAGAAATGTACAGCCAGGCACTCTCAC...AGATCACTGGACAGGAAAGCAGCTT...GAGCTTCCAGGGCAGCTGAGCTG 679  
TCCAGATGTTCAAGAGGTAAGAAATGTACAGCCAGGCACTCTCAC...AGATCACTGGACAGGAAAGCAGCTT...GAGCTTCCAGGGCAGCTGAGCTG 467  
TCCAGATGTTCAAGAGGTAAGAAATGTACAGCCAGGCACTCTCAC...AGATCACTGGACAGGAAAGCAGCTT...GAGCTTCCAGGGCAGCTGAGCTG 533  
Mus Rattus Cavia Homo  
G...CTTGTACCTCAGTGGCCACTCCCATGGGTTCCAACTAGACCTCATATCTGGAAGGTTCCAGAGCTT...CCCACAAAGAACACACACTAGCCAGGGACCATCTC 793  
G...CTTGTACCTCAGTGGCCACTCCCATGGGTTCCAACTAGACCTCATATCTGGAAGGTTCCAGAGCTT...CCCACAAAGAACACACACTAGCCAGGGACCATCTC 783  
GAAATGCTCTCCGAAAGGAGAGAACTT...GGGTTCCCTCAGCA...TACCTGAGCCTGGGTTG...CTC 529  
AGCAAAGGAGTCTTCTGTGACAGTGT...GGGTTCCCTCAGCA...TACCTGAGCCTGGGTTG...CTC 611  
Mus Rattus Cavia Homo  
AAACAATACAAACCTTCCAGGAGCAATTTTATATCTGCTCCACAAGCATGTTGAAAGGCCCATGCTAAAGAGAGGTGAATTCGGAAGGAATCCAGGGCCAGAAAGTCCCT 903  
AAATACACAAACCTTCCAGGAGCAATTTTATATCTGCTCCACAAGCATGTTGAAAGGCCCATGCTAAAGAGAGGTGAATTCGGAAGGAATCCAGGGCCAGAAAGTCCCT 891  
AAATACACAAACCTTCCAGGAGCAATTTTATATCTGCTCCACAAGCATGTTGAAAGGCCCATGCTAAAGAGAGGTGAATTCGGAAGGAATCCAGGGCCAGAAAGTCCCT 581  
AAATACACAAACCTTCCAGGAGCAATTTTATATCTGCTCCACAAGCATGTTGAAAGGCCCATGCTAAAGAGAGGTGAATTCGGAAGGAATCCAGGGCCAGAAAGTCCCT 667  
Mus Rattus Cavia Homo  
GGCAGTGAATCATTTGG...CTCAGACAGCAAGGAAAGTGAANAATCATGCGAGGAGAAAG...GGTGTGGAGGATCAGGAGGATCTTCAACAGACTAGCACTGAT 1002  
GGCAGTGAATCATTTGG...CTCAGACAGCAAGGAAAGTGAANAATCATGCGAGGAGAAAG...GGTGTGGAGGATCAGGAGGATCTTCAACAGACTAGCACTGAT 986  
GGCAGTGAATCATTTGG...CTCAGACAGCAAGGAAAGTGAANAATCATGCGAGGAGAAAG...GGTGTGGAGGATCAGGAGGATCTTCAACAGACTAGCACTGAT 668  
GGCAGTGAATCATTTGG...CTCAGACAGCAAGGAAAGTGAANAATCATGCGAGGAGAAAG...GGTGTGGAGGATCAGGAGGATCTTCAACAGACTAGCACTGAT 777  
Mus Rattus Cavia Homo  
GAAGGTACCTAATCATGTTCTTCTGCTTCATCA...CATTCATCCAAAATGTGAACCTAGAAAGTGA...TGGATGAAGTGGGGTGCAGGACCTGAGGGCCATCTC 1105  
GAAGGTACCTAATCATGTTCTTCTGCTT...CTTCAAGGAAATGTGAGCCTAGAAAGCTAGAGAGTGGGATGGGATGGGTTGGAGGGCTTAGGAGCCATCTA 1091  
GAAGGTACCTAATCATGTTCTTCTGCTT...CTTCAAGGAAATGTGAGCCTAGAAAGCTAGAGAGTGGGATGGGATGGGTTGGAGGGCTTAGGAGCCATCTA 743  
GAAGGTACCTAATCATGTTCTTCTGCTT...CTTCAAGGAAATGTGAGCCTAGAAAGCTAGAGAGTGGGATGGGATGGGTTGGAGGGCTTAGGAGCCATCTA 878  
Mus Rattus Cavia Homo  
ACTGACAGGATGTGAGGAGCA...TCTCAGGATCGACTAGGG... 1146  
ACTGACAGGATGTGAGGAGCA...TCTCAGGATCGACTAGGG... 1152  
...ACAGGAGGGGAGGAGAGTGGTCCAGGCTGGCTTGGGACAGAAATG...TTTCTTGGCTTGGGGAG...CTAGGAGCACTGAGGACTGCT 830  
CTCCATCAGGCTTGGAGGACTCAGCAAGCTCAGGGCCGCACTGGGACAGAAATGCTAGATTTTATTCTTGGGGAGAGGAGTGCAGGAGGAGGCTCTGTGGGATCT 987  
Mus Rattus Cavia Homo  
...GATACCAACTCAGAGGCTCACCACCTCTGCTATTTTCCAG 1189  
...GATACCAACTCAGAGGCTCACCACCTCTGCTATTTTCCAG 1175  
GGGAGCACTTGGCTGCTGCTGAGGCTCAGCTGCTGCTGCTGCTTTTCCAG 880  
GGGAGCACTTGGGTTGGCTGCTGAGCTGCTGCTGCTGCTTTTCCAG 1036

ENSMUSG00000034634 intron 1

Description: Lymphocyte antigen 6D Precursor (Ly6d)

Intron number: 1

Mouse chromosome: 15

Upstream exon length: 52

Downstream exon length: 99

Mouse intron length: 659

Intron alignment length: 882

Total murinae branch length: 0.18082

K\_score: 0.08033

Scaling factor: 0.65137

ENSMUSG00000034634 exon 1 (ORF 0)

|        |                                                         |    |
|--------|---------------------------------------------------------|----|
| Mus    | ATGAAGACAGCTCTGCTCCTCCCTTTGTTCTTGGCTGTGGCCACTAGGCCAG    | 52 |
| Rattus | ATGAAGACAGCTCTGCTCCTCCCTTTTGGCTTGGCTGTGGCCACTAGGCCAG    | 52 |
| Cavia  | ATGAAGACAGCTCTGCTCCTCCCTTTTGGCTTGGCTGTGGCCACTAGGCCAG    | 52 |
| Homo   | ATGAAGACAGCTCTGCTCCTCCCTTTGCAAGCCCTGGCTGTGGCTTACAGGCCAG | 52 |

ENSMUSG00000034634 exon 2 (ORF 2)

|        |                                       |           |       |          |         |       |        |       |      |       |       |     |     |      |      |      |     |    |     |    |    |
|--------|---------------------------------------|-----------|-------|----------|---------|-------|--------|-------|------|-------|-------|-----|-----|------|------|------|-----|----|-----|----|----|
| Mus    | CCTGGGCACTTCGATGTCAAGTGTGCACCAACAGTGC | CAACTGTAA | GAA   | CCCTCAGG | TCTGCCC | TCCA  | ACTTCT | ACT   | CG   | 80    |       |     |     |      |      |      |     |    |     |    |    |
| Rattus | CCAGGCATTC                            | CCGATGT   | CATGT | GTGCAT   | CAGCAGT | GACAA | ACTGT  | AGGAA | TAT  | CAGAC | CTGT  | CCA | CCG | ACTT | CT   | CT   | AG  | 80 |     |    |    |
| Cavia  | CCTACCACT                             | CCGCTGT   | CATGT | GTGCAT   | CAGCAGT | GGCAA | CTGCA  | AGAA  | TCC  | CAGAA | CTGCC | TAG | CAG | CTC  | CC   | GCT  | AG  | 80 |     |    |    |
| Homo   | CCCTTACCCT                            | GCGCTGC   | CAAGT | GTGCAC   | CAAGCT  | TCA   | GCAA   | ACTG  | CAAG | CA    | TCT   | CTG | GT  | CT   | GCCC | GCCA | GCT | CT | GCT | CG | 80 |

  

|        |            |          |    |
|--------|------------|----------|----|
| Mus    | TGCAAACCGT | CACCTCAG | 99 |
| Rattus | TGCAGAACAT | CACCAAAG | 99 |
| Cavia  | TGCAAGACTG | TGATTCAG | 99 |
| Homo   | TGCAAGACCA | CAACACAG | 99 |

ENSMUSG00000034634\_intron\_1

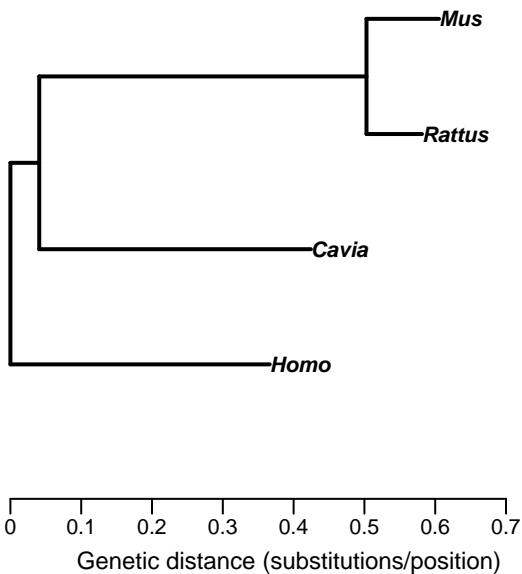





ENSMUSG00000038567 intron 5

Description: 1,25-dihydroxyvitamin D (Cyp24a1)

Intron number: 5

Mouse chromosome: 2

Upstream exon length: 92

Downstream exon length: 112

Mouse intron length: 933

Intron alignment length: 1460

Total murinae branch length: 0.19854

K\_score: 0.07871

Scaling factor: 0.65165

ENSMUSG00000038567 exon 5 (ORF 2)

|        |   |   |   |   |   |   |   |   |   |   |   |   |   |   |   |   |   |   |   |   |   |   |   |   |   |   |   |   |   |   |   |   |   |   |   |   |   |   |   |   |   |   |   |   |   |   |   |   |   |   |   |   |   |   |   |   |   |   |   |   |   |   |   |   |   |   |   |   |   |    |   |    |
|--------|---|---|---|---|---|---|---|---|---|---|---|---|---|---|---|---|---|---|---|---|---|---|---|---|---|---|---|---|---|---|---|---|---|---|---|---|---|---|---|---|---|---|---|---|---|---|---|---|---|---|---|---|---|---|---|---|---|---|---|---|---|---|---|---|---|---|---|---|---|----|---|----|
| Mus    | G | C | A | T | C | T | G | C | T | T | G | T | T | A | T | A | T | G | A | G | A | A | G | A | T | T | G | G | G | C | T | C | C | T | T | C | A | A | A | A | G | G | A | C | A | C | A | G | G | A | A | G | A | A | G | C | C | T | G | A | C | C | T | T | C | A | T | T | G | C  | G | 80 |
| Rattus | G | C | A | T | C | T | G | C | T | T | G | T | T | A | T | A | T | G | A | G | A | A | G | A | T | T | G | G | G | C | T | C | C | T | T | C | A | A | A | A | G | G | A | C | A | C | A | G | G | A | A | G | A | A | G | C | C | T | G | A | C | C | T | T | C | A | T | T | G | C  | G | 80 |
| Cavia  | G | C | A | T | C | T | G | C | T | T | G | T | T | A | T | A | T | G | A | G | A | A | G | A | T | T | G | G | G | C | T | C | C | T | T | C | A | A | A | A | G | G | A | C | A | C | A | G | G | A | A | G | A | A | G | C | C | T | G | A | C | C | T | T | C | A | T | T | G | C  | G | 80 |
| Homo   | G | T | A | T | C | T | G | C | T | T | C | A | T | G | A | T | G | A | G | A | A | G | A | T | T | G | G | G | C | T | C | C | T | T | C | A | A | A | A | G | G | A | C | A | C | A | G | G | A | A | G | A | A | G | C | C | T | G | A | C | T | T | C | A | T | T | G | C | G | 80 |   |    |

  

|        |   |   |   |   |   |   |   |   |   |   |   |   |    |
|--------|---|---|---|---|---|---|---|---|---|---|---|---|----|
| Mus    | G | C | C | A | T | C | A | A | A | A | C | A | 92 |
| Rattus | G | C | C | A | T | C | A | A | A | A | C | A | 92 |
| Cavia  | G | C | C | A | T | C | A | A | A | A | C | A | 92 |
| Homo   | G | C | C | A | T | C | A | A | A | A | C | A | 92 |

ENSMUSG00000038567 exon 6 (ORF 0)

|        |   |   |   |   |   |   |   |   |   |   |   |   |   |   |   |   |   |   |   |   |   |   |   |   |   |   |   |   |   |   |   |   |   |   |   |   |   |   |   |   |   |   |   |   |   |   |   |   |   |   |   |   |   |   |   |   |   |   |   |   |   |   |   |   |   |   |   |   |   |   |   |   |   |   |   |   |   |   |    |    |
|--------|---|---|---|---|---|---|---|---|---|---|---|---|---|---|---|---|---|---|---|---|---|---|---|---|---|---|---|---|---|---|---|---|---|---|---|---|---|---|---|---|---|---|---|---|---|---|---|---|---|---|---|---|---|---|---|---|---|---|---|---|---|---|---|---|---|---|---|---|---|---|---|---|---|---|---|---|---|---|----|----|
| Mus    | A | T | G | A | T | G | A | G | C | A | C | A | T | T | T | G | G | G | A | A | G | A | T | G | A | T | G | G | T | G | A | C | C | C | C | C | G | T | G | A | G | C | T | G | C | A | C | A | A | G | C | G | C | C | T | C | A | A | C | A | C | C | A | A | A | G | T | G | T | G | G | C | A | A | G | C | G | C | A  | 80 |
| Rattus | A | T | G | A | T | G | A | G | C | A | C | A | T | T | T | G | G | G | A | A | G | A | T | G | A | T | G | G | T | G | A | C | C | C | C | C | G | T | G | A | G | C | T | G | C | A | C | A | A | G | C | G | C | C | T | C | A | A | C | A | C | C | A | A | A | G | T | G | T | G | G | C | A | A | G | C | G | C | A  | 80 |
| Cavia  | A | T | G | A | T | G | A | G | C | A | C | A | T | T | T | G | G | G | A | A | G | A | T | G | A | T | G | G | T | G | A | C | C | C | C | G | T | G | A | G | C | T | G | C | A | C | A | A | G | C | G | C | C | T | C | A | A | C | A | C | C | A | A | A | G | T | G | T | G | G | C | A | A | G | C | G | C | A | 80 |    |
| Homo   | A | T | G | A | T | G | A | G | C | A | C | A | T | T | T | G | G | G | A | A | G | A | T | G | A | T | G | G | T | G | A | C | C | C | C | G | T | G | A | G | C | T | G | C | A | C | A | A | G | C | G | C | C | T | C | A | A | C | A | C | C | A | A | A | G | T | G | T | G | G | C | A | A | G | C | G | C | A | 80 |    |

  

|        |   |   |   |   |   |   |   |   |   |   |   |   |   |   |   |   |   |   |   |   |   |   |   |   |   |   |   |   |     |     |     |
|--------|---|---|---|---|---|---|---|---|---|---|---|---|---|---|---|---|---|---|---|---|---|---|---|---|---|---|---|---|-----|-----|-----|
| Mus    | C | A | C | G | C | T | G | G | C | T | G | G | G | A | C | A | C | C | A | T | T | T | C | A | A | A | T | C | A   | G   | 112 |
| Rattus | T | A | C | G | C | T | G | G | C | T | G | G | G | A | C | A | C | C | A | T | T | T | C | A | A | A | T | C | A   | G   | 112 |
| Cavia  | C | A | C | C | T | G | G | C | T | G | G | G | A | C | A | C | C | A | T | T | T | C | A | A | A | T | C | A | G   | 112 |     |
| Homo   | C | A | C | T | G | G | C | T | G | G | G | A | C | A | C | C | A | T | T | T | C | A | A | A | T | C | A | G | 112 |     |     |

ENSMUSG00000038567\_intron\_5

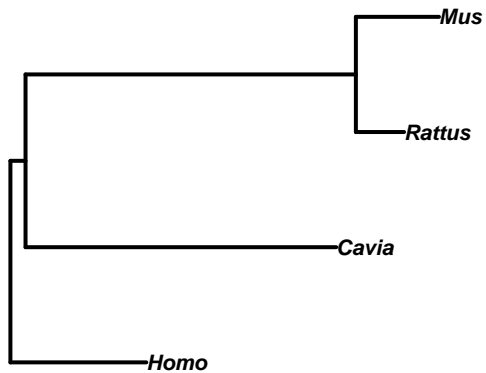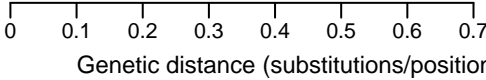

Mus Rattus Cavia Homo  
GTAAGCAGGCCCTGGACAGCATGCTCTCAAA...CTAGAATGCAGAAAGTAAAGG...ATCGCTGTGTCTCCCAAAGAGAAATACACACTTACTTAAAT 100  
GTAAGCAGGCCCTGGACAGCATGACCCAGTG...CTAGAATTCGAAAGAGAAAGGTTATCGCTGTGTCTCCAAAGAAAGTACACACTTACTTAAAT 99  
GTAAGCAGGCCCTGGACAGCATGACCCAGTG...CTAGAATTCGAAAGAGAAAGGTTATCGCTGTGTCTCCAAAGAAAGTACACACTTACTTAAAT 101  
GTAAGCAGGCCCTGGACAGCATGACCCAGTG...CTAGAATTCGAAAGAGAAAGGTTATCGCTGTGTCTCCAAAGAAAGTACACACTTACTTAAAT 107

Mus Rattus Cavia Homo  
TTTAACTACTTAATTCATTCCTTTGATATG...TATATTTTATATATATGATGTGTACCA... 157  
TTTAACTACTTAATTCATTCCTTTGATATG...TATATTTTATATATATGATGTGTACCA... 156  
TTTAACTACTTAATTCATTCCTTTGATATG...TATATTTTATATATATGATGTGTACCA... 159  
TTTAACTACTTAATTCATTCCTTTGATATG...TATATTTTATATATATGATGTGTACCA... 216

Mus Rattus Cavia Homo  
GACAAATTTTCCATGGACAGGGCAGGGTGGTGGGGCAGGGGAGGGATCATTAAAGTGCATTACGTTTACTGTGCACCTTATTTCTGTTATTATATACTCACCAT 326

Mus Rattus Cavia Homo  
AATGTAGAATCAGTGGGAGCCCTGAGCTTGTTCGTGCAACACGAAAGTCCCATCTGGGGGTGATGGGAGACAGTGACAGATCATCAGGCATTAGATTCTCATAAAGGAG 436

Mus Rattus Cavia Homo  
TGTGGAACATAGATTCTCGCATAGGCAATTCACAATAGGGTTCACACTCCTGTAAGAATCTAATGCAGCCATTGATCTGAGAGGGAGGACAGCTCAGGTTGTAACACCT 546

Mus Rattus Cavia Homo  
GCTGGCCCGCTGATCAGCTCCTGCTGGCGGCCCGTTCCTAACAGGCCACTGACCACTACTGGTTACAGGCCCTGGGGTGGGGACCCCTGGATATATGCACGTAACT 656

Mus Rattus Cavia Homo  
CACAAATAAGCTAAATCCATTACTATCTATTAGGCAAGTATTITACAA...AAAATACTATTTTAAATATATTTAAGGATCTGCAATTAATGGCAGTTGTTA 264  
CACAAATAAGCTAAATCCATTACTATCTATTAGGCAAGTATTITACAA...AAAATACTATTTTAAATATATTTAAGGATCTGCAATTAATGGCAGTTGTTA 264  
TTCAAGCAAGTAAATCCATTACTATCTATTAGGCAAGTATTITACAA...AAAATACTATTTTAAATATATTTAAGGATCTGCAATTAATGGCAGTTGTTA 260  
AAAGAAGCACTTAAATCCATTACTATCTATTAGGCAAGTATTITACAA...AAAATACTATTTTAAATATATTTAAGGATCTGCAATTAATGGCAGTTGTTA 734

Mus Rattus Cavia Homo  
AAAGATACCTTTTAAAG...GTTTCGAGTGTTCAGGTTTAAAAGTITGAAAGTGGTITGAGTAAATTCAGATATAAGATATAGATATGAT...GATTGATTTGGGATTAAC 368  
AAAGATACCTTTTAAAG...GTTTCGAGTGTTCAGGTTTAAAAGTITGAAAGTGGTITGAGTAAATTCAGATATAAGATATAGATATGAT...GATTGATTTGGGATTAAC 365  
TTCAAGCAAGTAAATCCATTACTATCTATTAGGCAAGTATTITACAA...AAAATACTATTTTAAATATATTTAAGGATCTGCAATTAATGGCAGTTGTTA 342  
AAAATACTATTTTAAATATATTTAAGGATCTGCAATTAATGGCAGTTGTTA...GATTGATTTGGGATTAAC 342

Mus Rattus Cavia Homo  
AGGTTT...GTTACTATACAGAAACCTGGACCAAAATAGGCAAGTATAG...TTTTCCAGGTTTTCCTCTTTCTATACAAATCAGGACATTAATACTGGGCTGGCAGTACGG 475  
AGGTTT...GTTACTATACAGAAACCTGGACCAAAATAGGCAAGTATAG...TTTTCCAGGTTTTCCTCTTTCTATACAAATCAGGACATTAATACTGGGCTGGCAGTACGG 472  
AGGTTT...GTTACTATACAGAAACCTGGACCAAAATAGGCAAGTATAG...TTTTCCAGGTTTTCCTCTTTCTATACAAATCAGGACATTAATACTGGGCTGGCAGTACGG 423  
AGGTTT...GTTACTATACAGAAACCTGGACCAAAATAGGCAAGTATAG...TTTTCCAGGTTTTCCTCTTTCTATACAAATCAGGACATTAATACTGGGCTGGCAGTACGG 931

Mus Rattus Cavia Homo  
TCTACCATACAGGGTACGGGCTACCATAGCAGCTGCTTAGGGCTGGTACGGGCTACCAT...AGGAGCTGCTTGGTGGGCTCAGAGGCAAGAATAATGGAAAGTTTAA 585  
TCTACCATACAGGGTACGGGCTACCATAGCAGCTGCTTAGGGCTGGTACGGGCTACCAT...AGGAGCTGCTTGGTGGGCTCAGAGGCAAGAATAATGGAAAGTTTAA 530  
TCTACCATACAGGGTACGGGCTACCATAGCAGCTGCTTAGGGCTGGTACGGGCTACCAT...AGGAGCTGCTTGGTGGGCTCAGAGGCAAGAATAATGGAAAGTTTAA 423  
TCTACCATACAGGGTACGGGCTACCATAGCAGCTGCTTAGGGCTGGTACGGGCTACCAT...AGGAGCTGCTTGGTGGGCTCAGAGGCAAGAATAATGGAAAGTTTAA 942

Mus Rattus Cavia Homo  
AGGTTT...GTTACTATACAGAAACCTGGACCAAAATAGGCAAGTATAG...TTTTCCAGGTTTTCCTCTTTCTATACAAATCAGGACATTAATACTGGGCTGGCAGTACGG 693  
AGGTTT...GTTACTATACAGAAACCTGGACCAAAATAGGCAAGTATAG...TTTTCCAGGTTTTCCTCTTTCTATACAAATCAGGACATTAATACTGGGCTGGCAGTACGG 638  
TCTACCATACAGGGTACGGGCTACCATAGCAGCTGCTTAGGGCTGGTACGGGCTACCAT...AGGAGCTGCTTGGTGGGCTCAGAGGCAAGAATAATGGAAAGTTTAA 486  
TCTACCATACAGGGTACGGGCTACCATAGCAGCTGCTTAGGGCTGGTACGGGCTACCAT...AGGAGCTGCTTGGTGGGCTCAGAGGCAAGAATAATGGAAAGTTTAA 1012

Mus Rattus Cavia Homo  
ATGCTT...CTTAAGCAACCAGCAATCTG...GGGTTTCTATCCCAAGTACAAACCAACATAGAGAGATATCTTTTATTAATGAGCAGCAATAATGCTTTGAGATGAGG 802  
ATGCTT...CTTAAGCAACCAGCAATCTG...GGGTTTCTATCCCAAGTACAAACCAACATAGAGAGATATCTTTTATTAATGAGCAGCAATAATGCTTTGAGATGAGG 737  
ATGCTT...CTTAAGCAACCAGCAATCTG...GGGTTTCTATCCCAAGTACAAACCAACATAGAGAGATATCTTTTATTAATGAGCAGCAATAATGCTTTGAGATGAGG 482  
ATGCTT...CTTAAGCAACCAGCAATCTG...GGGTTTCTATCCCAAGTACAAACCAACATAGAGAGATATCTTTTATTAATGAGCAGCAATAATGCTTTGAGATGAGG 1038

Mus Rattus Cavia Homo  
AGAGAGATGGTGG...CCTTTGATGCCCACCTTCAAGGATGCAGAAAGGGGCTGAGTAAAGACTCTCCCTTCAAGGAGAATGCTGTCTTAGAGAGAAAGATGG...TG 906  
AGAGAGATGGTGG...CCTTTGATGCCCACCTTCAAGGATGCAGAAAGGGGCTGAGTAAAGACTCTCCCTTCAAGGAGAATGCTGTCTTAGAGAGAAAGATGG...TG 842  
AGAGAGATGGTGG...CCTTTGATGCCCACCTTCAAGGATGCAGAAAGGGGCTGAGTAAAGACTCTCCCTTCAAGGAGAATGCTGTCTTAGAGAGAAAGATGG...TG 575  
AGAGAGATGGTGG...CCTTTGATGCCCACCTTCAAGGATGCAGAAAGGGGCTGAGTAAAGACTCTCCCTTCAAGGAGAATGCTGTCTTAGAGAGAAAGATGG...TG 1148

Mus Rattus Cavia Homo  
GGGTTTCAA...GCTTGTGTGTTTCTTACAG 933  
GGGTTTCAA...GCTTGTGTGTTTCTTACAG 869  
GGGTTTCAA...GCTTGTGTGTTTCTTACAG 595  
GGGTTTCAA...GCTTGTGTGTTTCTTACAG 1178

ENSMUSG00000007783 intron 14

Description: Carnitine O-palmitoyltransferase 1, brain isoform (Cpt1c)

Intron number: 14

Mouse chromosome: 7

Upstream exon length: 132

Downstream exon length: 153

Mouse intron length: 608

Intron alignment length: 970

Total murinae branch length: 0.14865

K\_score: 0.07037

Scaling factor: 0.65235

ENSMUSG00000007783 exon 14 (ORF 0)

|        |                                                                                   |    |
|--------|-----------------------------------------------------------------------------------|----|
| Mus    | GACAGGGGTCAATTCTGCCTGACTTATGAGTCAGCCATGAGCCGACTGTTCTGGAAGGCCAGGACAGAGACAGTGAAGTCC | 80 |
| Rattus | GACAGGGGTCAATTCTGCCTGACTTATGAGTCAGCCATGAGCCGACTGTTCTGGAAGGCCAGGACAGAGACAGTGAAGTCC | 80 |
| Cavia  | GACAGGGGTCAATTCTGCCTGACTTATGAGTCAGCCATGAGCCGACTGTTCTGGAAGGCCAGGACAGAGACAGTGAAGTCC | 80 |
| Homo   | GACAGGGGTCAATTCTGCCTGACTTATGAGTCAGCCATGAGCCGACTGTTCTGGAAGGCCAGGACAGAGACAGTGAAGTCC | 80 |

  

|        |                                                       |     |
|--------|-------------------------------------------------------|-----|
| Mus    | TTGCACCAGAGAGGCTGCCAGTTTGTGAGAGCCATGAGCAACAAGGAGA--CA | 132 |
| Rattus | TTGCACCAGAGAGGCTGCCAGTTTGTGAGAGCCATGAGCAACAAGGAGA--CA | 132 |
| Cavia  | TTGCACCAGAGAGGCTGCCAGTTTGTGAGAGCCATGAGCAACAAGGAGA--CA | 135 |
| Homo   | TTGCACCAGAGAGGCTGCCAGTTTGTGAGAGCCATGAGCAACAAGGAGA--CA | 135 |

ENSMUSG00000007783 exon 15 (ORF 0)

|        |                                                                                     |    |
|--------|-------------------------------------------------------------------------------------|----|
| Mus    | GACCAACAATTGCCTCGCCCTGTTCCGAGTGGCCGTGGACAAGCACCAAGGCTCTACTGAAGGCAGCCGATGAGTGGCCAGGG | 80 |
| Rattus | GACCAACAAGTGCCTCGCCCTGTTCCGAGTGGCCGTGGACAAGCACCAAGGCTCTACTGAAGGCAGCCGATGAGTGGCCAGGG | 80 |
| Cavia  | GACCAACAAGTGCCTCGCCCTGTTCCGAGTGGCCGTGGACAAGCACCAAGGCTCTACTGAAGGCAGCCGATGAGTGGCCAGGG | 80 |
| Homo   | GACCAACAAGTGCCTCGCCCTGTTCCGAGTGGCCGTGGACAAGCACCAAGGCTCTACTGAAGGCAGCCGATGAGTGGCCAGGG | 80 |

  

|        |                                                                          |     |
|--------|--------------------------------------------------------------------------|-----|
| Mus    | GATTGACCGTCACCTCTTGGCACTGTACATCATGTCCCCTCTCCTCCATATGCAGTGGCCCTTCTGACCCAG | 153 |
| Rattus | GATTGACCGTCACCTCTTGGCACTGTACATCATGTCCCCTCTCCTCCATATGCAGTGGCCCTTCTGACCCAG | 153 |
| Cavia  | GATTGACCGTCACCTCTTGGCACTGTACATCATGTCCCCTCTCCTCCATATGCAGTGGCCCTTCTGACCCAG | 153 |
| Homo   | GATTGACCGTCACCTCTTGGCACTGTACATCATGTCCCCTCTCCTCCATATGCAGTGGCCCTTCTGACCCAG | 153 |

ENSMUSG00000007783\_intron\_14

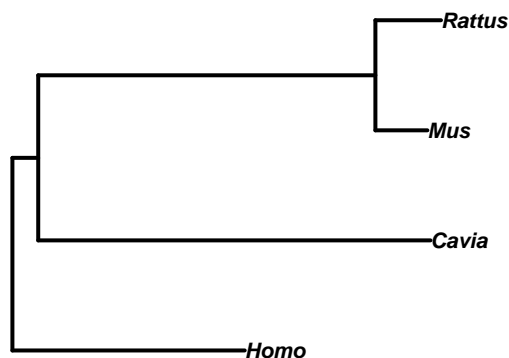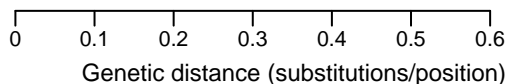



ENSMUSG00000034918 intron 11

Description: protocadherin 24 (Cdhr2)

Intron number: 11

Mouse chromosome: 13

Upstream exon length: 234

Downstream exon length: 156

Mouse intron length: 787

Intron alignment length: 1665

Total murinae branch length: 0.29201

K\_score: 0.06777

Scaling factor: 0.65423

ENSMUSG00000034918 exon 11 (ORF 0)

|        |                                                                                          |    |
|--------|------------------------------------------------------------------------------------------|----|
| Mus    | TGTC AACG ACCACA AAGCCGGAATTTTACA AACTGCAGCCTCCCTGGCTGCTCCTTTAGCCCCCAAGGAGGCCCAAGTCAACT  | 30 |
| Rattus | TGTC AACG ACCACA AAGCCGGAATTTTACA AACTGCAGCCTCCAAAACTGCACTTCAAGCCCAAGGAGGCCCAAGGACA ACT  | 30 |
| Cavia  | TGTC AATG ACCACA AAGCCGGAATTTTACA AACTGCCTCCTCGAAGACTGCTCCTTCAAGCCCAAGGAGGCCCAAGGACA ACT | 30 |
| Homo   | CGTCAATG ACCACA AAGCTTGA GTTTTACA AACTGCAGCCTCGAGCTGCACCTTCAAGCCCGAAGAGGCCCAAGTGA ACT    | 30 |

  

|        |                                                                                    |     |
|--------|------------------------------------------------------------------------------------|-----|
| Mus    | TCATAGGCTACGTGGACGAGCATGCCTCTGCCCGAATCTCCATCGATGGTCTGACCATGCTGGCCTAIGATCCAGACCA    | 160 |
| Rattus | TCACAGGCTATGTGGATTGAGCATGCCTCTGCCA GAATCTCCATCGATGGTCTGACCATGCTGGCCTACGACCCAGATCAG | 160 |
| Cavia  | TCACTGCCTATGTGGACGAGCATGTCTCCGCCGCATCTCAATTGACAATCTCACCATGCTGGCCTACGACCCAGACAAG    | 160 |
| Homo   | TCACTGGCTACGTGGACGAGCATGCCTCCGCCGCATCTCCATCGATGACTCACCATGCTGGTCTACGACCCGACAAG      | 160 |

ENSMUSG00000034918 exon 12 (ORF 0)

|        |                                                                                 |    |
|--------|---------------------------------------------------------------------------------|----|
| Mus    | GGCGACAATGGTACCTTCCTGCTGTCCCTGAATGGCAAGATGCTGAAGCCTTCAATGTGTCCCAAGAGCGAGCAGCG   | 80 |
| Rattus | GGTGC CAATGGCAAGTTCCTGCTTCCCTGAATGGCAAGATGCTGAAGCCTTCAAGCTGTCCCAAGAGCGAGCGGCGCT | 80 |
| Cavia  | GGCAACAAGGCACTTCCTGCTGTCCCTGGGGGCCCCGATGCTGAAGCCTTCAAGCTGTCCCTGGACGGCAGCAGCG    | 80 |
| Homo   | GGCAACAATGGCACTTCCTGTTGTGCTGGGGGCCCCGATGCAAGAGCCTTCAAGCTGTCCCGGAGCGGGCACTGG     | 80 |

  

|        |                                                                               |     |
|--------|-------------------------------------------------------------------------------|-----|
| Mus    | GTCTGTCACTGTGCAGTCTTGGTGAGAAACTCAGAGATGCTGGACTATGAGAAGGAGACACTGATGCTTGTGGAG   | 156 |
| Rattus | GTCTGTCACTGTGCAGTCTTGGTGAGAAATTCAGAGATGCTGGACTATGAGAAGGAGACACTGATGCAAGTGCAG   | 156 |
| Cavia  | CTCAGCCGACGTGCAAGTCTTGGTGAGAAATTCAGAGATGCTGGACTATGAGAAGGAGACACTGATGCTTGGTGCAG | 156 |
| Homo   | CTCAGCCCTCCGTTCAGGTGCTGGTGAGAGTATCGCCGCTGGTGGACTATGAGAAGGAGACACTGATGCTGGTGCAG | 156 |

ENSMUSG00000034918\_intron\_11

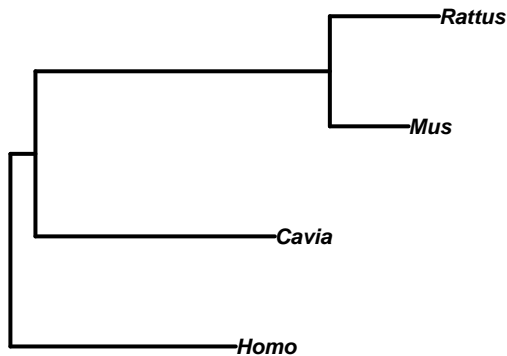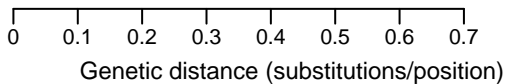



ENSMUSG00000042185 intron 23

Description: Nuclear factor related to kappa-B-binding protein (Nfrkb)

Intron number: 23

Mouse chromosome: 9

Upstream exon length: 107

Downstream exon length: 136

Mouse intron length: 731

Intron alignment length: 1075

Total murinae branch length: 0.20758

K\_score: 0.07054

Scaling factor: 0.6551

ENSMUSG00000042185 exon 23 (ORF 0)

|        |                                                                                    |    |
|--------|------------------------------------------------------------------------------------|----|
| Mus    | GGGAAGCTGCCTACCAAGATCACAGTTCTCTTTCTGTGATTAGCCAGCCAAATGAAAGGGCAAGAGCGTGGTCAACAGCCCC | 80 |
| Rattus | GGGAAGCTGCCTACCAAGATCACAGTTCTCTTTCTGTGATTAGCCAGCCAAATGAAAGGGCAAGAGCGTGGTCAACAGCCCC | 80 |
| Cavia  | GGGAAGCTGCCTACCAAGATCACAGTTCTCTTTCTGTGATTAGCCAGCCAAATGAAAGGGCAAGAGCGTGGTCAACAGCCCC | 80 |
| Homo   | GGGAAGTTGCCTACCAAGATCACAGTTCTCTTTCTGTGATTAGCCAGCCAAATGAAAGGGCAAGAGCGTGGTCAACAGCCCC | 80 |

  

|        |                              |     |
|--------|------------------------------|-----|
| Mus    | CATCATCAAAGGCCAACCTTGGAGCCAA | 107 |
| Rattus | CATCATCAAAGGCCAACCTTGGAGCCAA | 107 |
| Cavia  | CATCATCAAAGGCCAACCTTGGAGCCAA | 107 |
| Homo   | CATCATCAAAGGCCAACCTTGGAGCCAA | 107 |

ENSMUSG00000042185 exon 24 (ORF 1)

|        |                                                                                     |    |
|--------|-------------------------------------------------------------------------------------|----|
| Mus    | TCTCAGTGGGCTGGGTGGCAACATCATCCTCACGACCATGCCAGCAGGTACCAAAGCTCATTGCTGGCAATAAGCCAGTGA   | 80 |
| Rattus | TCTCAGTGGGCTGGGTGGCAACATCATCCTCACGACCATGCCAGCAGGTACCAAAGCTCATTGCTGGCAATAAGCCAGTGA   | 80 |
| Cavia  | CCTCAGTGGGCTGGGTGGCAACATCATCCTCACGACCATGCCAGCAGGTACCAAAGCTCATTGCTGGCAATAAGCCAGTGA   | 80 |
| Homo   | CCTCAGTGGGTTGGTGGCAACATCATCCTCACGACCATGCCAGCAGGTACCAACTAAGCTCATTGCTGGCAATAAGCCAGTGA | 80 |

  

|        |                                                          |     |
|--------|----------------------------------------------------------|-----|
| Mus    | GTTTCCTCACTGCTCAGCAGTTGCAGCAGCTTCAGCAACAAGGTCAGGCTACACAG | 136 |
| Rattus | GTTTCCTCACTGCTCAGCAGTTGCAGCAGCTTCAGCAACAAGGTCAGGCTACACAG | 136 |
| Cavia  | GTTTCCTCACTGCTCAGCAGTTGCAGCAGCTTCAGCAACAAGGTCAGGCTACACAG | 136 |
| Homo   | GTTTCCTCACTGCTCAGCAGTTGCAGCAGCTTCAGCAACAAGGTCAGGCTACACAG | 136 |

ENSMUSG00000042185\_intron\_23

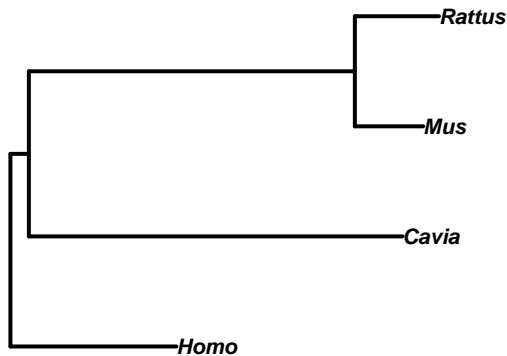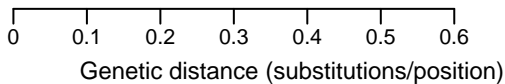





ENSMUSG00000030352 intron 4

Description: Tetraspanin-9 (Tspan9)

Intron number: 4

Mouse chromosome: 6

Upstream exon length: 102

Downstream exon length: 132

Mouse intron length: 551

Intron alignment length: 743

Total murinae branch length: 0.18979

K\_score: 0.07622

Scaling factor: 0.65599

ENSMUSG00000030352 exon 4 (ORF 0)

|        |                                                                                          |    |
|--------|------------------------------------------------------------------------------------------|----|
| Mus    | GTGAACGAGAAATGCCAAGCAGGACCTGAAAGAAGGGGCTGCTGCTGTACAACACAGSAGAACAAACGCTGGGGCTCAAGAAAGCG   | 80 |
| Rattus | GTGAACGAGAAATGCCAAGCAGGACCTGAAAGAAGGGGCTGCTGCTGTACAACACCTGAGAACAAACGCTGGGGCTCAAGAAATGGCG | 80 |
| Cavia  | GTGAATGAGAAATGCCAAGCAGGACCTGAAAGGAAGGACTGCTGCTGTACAACACTGAGAACAAACGCTGGGGCTCAAGAAATGGCG  | 80 |
| Homo   | GTGAACGAGAAAGGCCAAGCAGGACCTGAAAGGAAGGACTGCTGCTGTACAACACAGSAGAACAAACGCTGGGGCTCAAGAAAGCG   | 80 |

  

|        |                          |     |
|--------|--------------------------|-----|
| Mus    | CTGGAACATCATCCAGGCAGAG   | 102 |
| Rattus | CTGGAAATCATCATCCAGGCAGAG | 102 |
| Cavia  | CTGGAACATATCATCCAGGCTGAG | 102 |
| Homo   | CTGGAACATCATCCAGGCTGAG   | 102 |

ENSMUSG00000030352 exon 5 (ORF 0)

|        |                                                                                   |    |
|--------|-----------------------------------------------------------------------------------|----|
| Mus    | ATGCGGTGTTGTGGGGTCACTGACTACACAGACTGGTATCCGGTGCTCGGGGAGAACACAGTTCCCTGACAGATGCTGCAT | 80 |
| Rattus | ATGCGGTGTTGTGGGGTCACTGACTATACAGACTGGTATCCAGTGCTCGGGGAGAACACAGTTCCCTGACCGCTGCTGCAT | 80 |
| Cavia  | ATGCGATGCTGTGGGGTCACTGACTACACAGACTGGTATCCAGTGCTCGGGGAGAACACAGTTCCCTGACCGTTGCTGCAT | 80 |
| Homo   | ATGCGATGCTGTGGGGTCACTGACTACACAGACTGGTATCCAGTGCTCGGGGAGAACAGGTTCCCTGACCGCTGCTGCAT  | 80 |

  

|        |                                                    |     |
|--------|----------------------------------------------------|-----|
| Mus    | GGAGAATTCCAGGGCTGTGGGCGCAACAGCACCACCCCTTGTGGAGAACG | 132 |
| Rattus | GGAGAATTCCAGGGCTGTGGGCGCAACAGCACCACCCCTTGTGGAAAACG | 132 |
| Cavia  | GGAGAATTCCAGGGCTGTGGGCGAACAGCACTACCCTTGTGGAAAACG   | 132 |
| Homo   | GGAGAACTCCAGGGCTGTGGGCGCAACGCCACCACCCCTTGTGGAGAACG | 132 |

ENSMUSG00000030352\_intron\_4

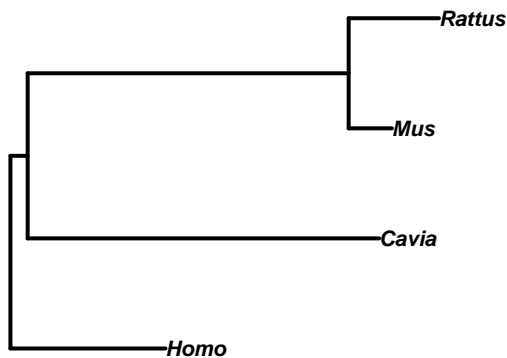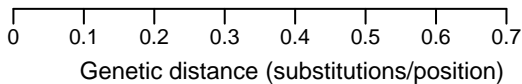



ENSMUSG00000006021 intron 11

Description: Kaptin (Kptn)  
 Intron number: 11  
 Mouse chromosome: 7  
 Upstream exon length: 171  
 Downstream exon length: 126  
 Mouse intron length: 1010  
 Intron alignment length: 1087  
 Total murinae branch length: 0.10397  
 K\_score: 0.08895  
 Scaling factor: 0.65898

ENSMUSG00000006021 exon 11 (ORF 0)

|        |       |               |                                            |              |       |            |    |
|--------|-------|---------------|--------------------------------------------|--------------|-------|------------|----|
| Mus    | T     | -----         | GGACTGCCAGAGGACAGCAGAGGGCTTCCGCCTGCTGTGGG  | GCAGGAGCTTCC | CCAGC | CCCCTGCTGG | 68 |
| Rattus | T     | -----         | GGACTGCCAGAGGACAGCAGAGGGCTTCCGCCTGCTGTGGG  | GCAGGAGCTTCC | CCAGC | CCCCTGCTGG | 68 |
| Cavia  | C     | AGCCCTAGAGCCA | GGAGCTGCCAGAGGACAGCAGAGGGCTTCCGCCTGCTGTGGG | GCAGGAGCTTCC | CCAGC | CCCCTGCTGG | 80 |
| Homo   | GGGCC | CAGAGT        | GGAGCTTCC                                  | GCAGGAGCTTCC | CCAGC | CCCCTGCTGG | 80 |

  

|        |                                                                                 |     |
|--------|---------------------------------------------------------------------------------|-----|
| Mus    | CCATGGCCCATGTGGACCTGACTGGAGATGGCCTGGGGAGCTGGCCGTGATATCCCTGAAAGGGGTGCACATCCTCCAG | 148 |
| Rattus | CCATGGCCCATGTGGACCTGACTGGAGATGGCCTGGGGAGCTGGCCGTGATATCCCTGAAAGGGGTGCACATCCTCCAG | 148 |
| Cavia  | CCATGGCCCATGTGGATCTGACTGGGGATGGCCTGGAGAGCTGGCTGTGGTCTCCCTGAAAGGGGTGCACATCCTCCAG | 160 |
| Homo   | CCATGGCTCAGTGGACCTGACCGGGGATGGCCTGGAGAGCTTGGCGTGGTCTCCCTGAAAGGGGTGCACATCCTCCAG  | 160 |

ENSMUSG00000006021 exon 12 (ORF 0)

|        |                                                                             |                                                   |                   |        |    |
|--------|-----------------------------------------------------------------------------|---------------------------------------------------|-------------------|--------|----|
| Mus    | CACAGCCTGATCCAGGCCTCTGA                                                     | ACTGGTCTTGACACGGCTTCGTCATCAAGTGGAGCAGAGGAAACATCAG | - -               | CAGGG  | 77 |
| Rattus | CACAGCCTGATCCAGGCCTCTGAGCTGGTCTTGACACGGCTTCGTCATCAAGTGGAGCAGAGGAAACATCAG    | - -                                               | CAGGG             | 77     |    |
| Cavia  | CACAGCCTGATCCAGGCCTCTGAGTGGTCTTGACACGGCTTCAGCGC                             | CAAGTGGAA                                         | CGGATGAAACGGCAGGC | CAAGGG | 80 |
| Homo   | CACAGCCTGATTCAGGCCTCAGAGCTGGTCTTGACACGGCTTCGATCATCAAGTGGAGCAGAGGAGACGTGCGCT | ACAGGG                                            | 80                |        |    |

  

|        |                                       |                             |     |
|--------|---------------------------------------|-----------------------------|-----|
| Mus    | CCTTGGGGACACACTTGGCC                  | CAGGCCTGTGAAACCCAGCCTCCTGA  | 126 |
| Rattus | CCTTGGGGACACAGGGGGTCC                 | CAGACCTGAGGAGCCCCAGCCTCCTGA | 126 |
| Cavia  | ALCCGGGGACAGGGGGCTCCAGGGCCTGCTGAGAGCA | CAGCCTCCTGA                 | 129 |
| Homo   | GTTTGCAGGAGGGGGAGGTGCAAGGCCTGCTGASAA  | TCCAGCCTCTTAA               | 129 |

ENSMUSG00000006021\_intron\_11

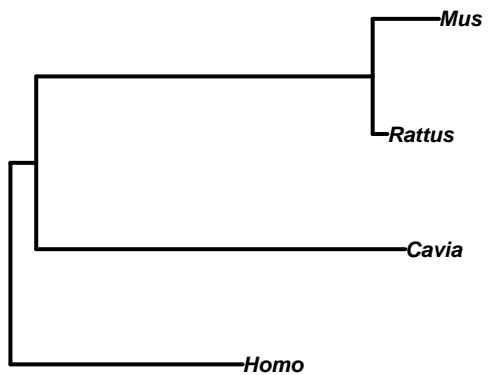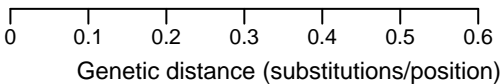

Mus 110  
Rattus 105  
Cavia 85  
Homo 63  
Mus 193  
Rattus 188  
Cavia 137  
Homo 172  
Mus 303  
Rattus 283  
Cavia 186  
Homo 237  
Mus 354  
Rattus 332  
Cavia 267  
Homo 347  
Mus 450  
Rattus 427  
Cavia 346  
Homo 453  
Mus 538  
Rattus 515  
Cavia 456  
Homo 484  
Mus 629  
Rattus 612  
Cavia 566  
Homo 516  
Mus 694  
Rattus 677  
Cavia 671  
Homo 576  
Mus 750  
Rattus 734  
Cavia 781  
Homo 644  
Mus 776  
Rattus 760  
Cavia 891  
Homo 705  
Mus 841  
Rattus 827  
Cavia 998  
Homo 787  
Mus 896  
Rattus 885  
Cavia 1101  
Homo 822  
Mus 949  
Rattus 938  
Cavia 1211  
Homo 890  
Mus 1010  
Rattus 1000  
Cavia 1308  
Homo 987

ENSMUSG00000033105 intron 15

Description: Lanosterol synthase (Lss)

Intron number: 15

Mouse chromosome: 10

Upstream exon length: 150

Downstream exon length: 97

Mouse intron length: 551

Intron alignment length: 437

Total murinae branch length: 0.25776

K\_score: 0.07351

Scaling factor: 0.66046

ENSMUSG00000033105 exon 15 (ORF 0)

|        |                                                                                   |    |
|--------|-----------------------------------------------------------------------------------|----|
| Mus    | GGTGGTTTCTCCTTCAACACACTGGACTGTGGCTGGATCGTTGCTGACTGCACAGCCGAGGCCTTTGAAGGCTGTGCTGCT | 80 |
| Rattus | GGTGGTTTCTCCTTCAACACACTGGACTGTGGCTGGATCGTTGCTGACTGCACAGCCGAGGCCTTTGAAGGCTGTGCTGCT | 80 |
| Cavia  | GGTGGCTTTCTCCTTCACTACCTGGACTGTGGCTGGATCGTTGCTGACTGCACAGCCGAGGCCTTTGAAGGCTGTGCTGCT | 80 |
| Homo   | GGTGGCTTTCTCCTTCACTACCTGGACTGTGGCTGGATCGTTGCTGACTGCACAGCCGAGGCCTTTGAAGGCTGTGCTGCT | 80 |

  

|        |                                                                            |     |
|--------|----------------------------------------------------------------------------|-----|
| Mus    | CCTGCAGAAATCAGTGTCCGTCCATCACTGAGCATAATCCCCGAGAGCGGGCTGTGCGATGCTGTGGATGTG   | 150 |
| Rattus | CCTGCAGGAGCGGTGTCCCTCAATCACGAGCATAATCCCCAAGAGCGACTCTACAAATGCTGTGGCTGTG     | 150 |
| Cavia  | CCTACAAAGAGAAAGTGTCCCTGTATTGCTGAAGCGCATCCCTCAAGAACGGCTCTGTGATGCGGTGGCTGTG  | 150 |
| Homo   | CCTGCAGGAGAAAGTGTCCCTCATGTCACCGAGCATAATCCCCAAGAGAACGGCTCTGCGATGCTGTGGCTGTG | 150 |

ENSMUSG00000033105 exon 16 (ORF 0)

|        |                                                                                     |    |
|--------|-------------------------------------------------------------------------------------|----|
| Mus    | TTACTGAGCCTTGAAGAAATCCTGATGGCGGGTTCCGCTACCTATGAGAAAGAGCGTGGGGCTTACTTGCTGGAGCTGCTGAA | 80 |
| Rattus | TTGTTGAGCATGAGGAATTCGATGGAGGGTTTCCGCTACCTATGAGACTAAGCGTGGCGGGTATTTGCTGGAGCTGCTGAA   | 80 |
| Cavia  | TTACTGAACATGAGGAATCCTGATGGAGGGTTTCCGCTACCTATGAGACTACACGTGGGGGGCGCTTGCTGGAAATGCTTAA  | 80 |
| Homo   | CTGCTGAACATGAGAAATCCAGATGGAGGGTTCCGCTACCTATGAGACCAGAGCGTGGGGGGCACTTGCTGGAGCTGCTGAA  | 80 |

  

|        |                   |    |
|--------|-------------------|----|
| Mus    | CCCCTCAGAGGTCTTTG | 97 |
| Rattus | CCCCTCAGAGGTCTTTG | 97 |
| Cavia  | TCCCTCGGAGGTCTTTG | 97 |
| Homo   | CCCCTCGGAGGTCTTTG | 97 |

ENSMUSG00000033105\_intron\_15

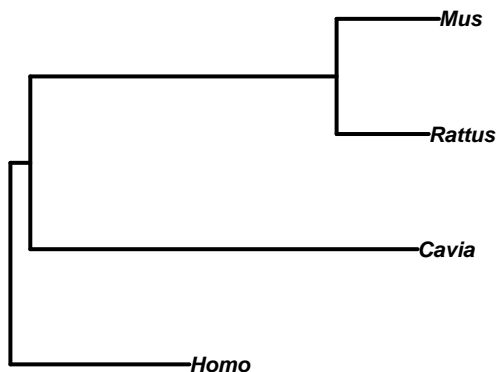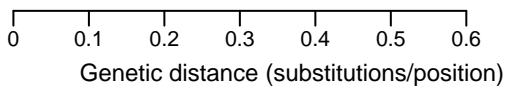

Mus 61  
Rattus 61  
Cavia 61  
Homo 110  
Mus 150  
Rattus 137  
Cavia 162  
Homo 219  
Mus 256  
Rattus 243  
Cavia 266  
Homo 275  
Mus 362  
Rattus 349  
Cavia 361  
Homo 363  
Mus 410  
Rattus 400  
Cavia 435  
Homo 464  
Mus 490  
Rattus 479  
Cavia 523  
Homo 574  
Mus 551  
Rattus 540  
Cavia 597  
Homo 859

ENSMUSG00000003549 intron 6

Description: DNA excision repair protein ERCC-1 (Ercc1)

Intron number: 6

Mouse chromosome: 7

Upstream exon length: 100

Downstream exon length: 72

Mouse intron length: 675

Intron alignment length: 1238

Total murinae branch length: 0.21467

K\_score: 0.04806

Scaling factor: 0.66201

ENSMUSG00000003549 exon 6 (ORF 1)

|        |                                                                                     |    |
|--------|-------------------------------------------------------------------------------------|----|
| Mus    | TGCAGAGGGAAGCAAGGGCGGTACCTGGAGACCTACAAGGGCTATGAGCAGAAAGCCAGCCGACCTCCTTATGGAAAAGCTGG | 80 |
| Rattus | TGCAGAGGGAAGCAAGGGCGGTACCTGGAGACCTACAAGGGCTATGAGCAGAAAGCCAGCCGACCTCCTTATGGAAAAGCTGG | 80 |
| Cavia  | CCCCGAGGGAAGCTGGGCGGTACCTGGAGACCTACAAGGGCTATGAGCAGAAAGCCAGCCGACCTCCTTATGGAAAAGCTGG  | 80 |
| Homo   | CCCCGAGGGAAGCTGGGCGGTACCTGGAGACCTACAAGGGCTATGAGCAGAAAGCCAGCCGACCTCCTTATGGAAAAGCTGG  | 80 |

  

|        |                      |     |
|--------|----------------------|-----|
| Mus    | AGCAGAACTTCCTATCACGG | 100 |
| Rattus | AACAGAACTTCCTATCACGG | 100 |
| Cavia  | AACAGAACTTCCTATCACGG | 100 |
| Homo   | AGCAGAACTTCCTATCACGG | 100 |

ENSMUSG00000003549 exon 7 (ORF 0)

|        |                                                                             |    |
|--------|-----------------------------------------------------------------------------|----|
| Mus    | GCCACTGAGTGTCTGACCACCGTGAAATCTGTGAACAAAGACTGACAGCCAGACCCTCCTGACTACATTTGGA   | 72 |
| Rattus | GCCACTGAGTGTCTGACCACCGTGAAATCTGTGAACAAAGACTGACAGCCAGACCCTCCTGACTACATTTGGA   | 72 |
| Cavia  | ATCACTGAATGTCTGACCACAGTGAAGTCAAGTCAACAAAACAGACAGTCAAAACTCTTCTCACTTTTGGG     | 72 |
| Homo   | GTGACTGAATGTCTGACCACCGTGAAAGTCAAGTCAACAAAACAGACAGTCAAGACCCTCCTGACTACATTTGGA | 72 |

ENSMUSG00000003549\_intron\_6

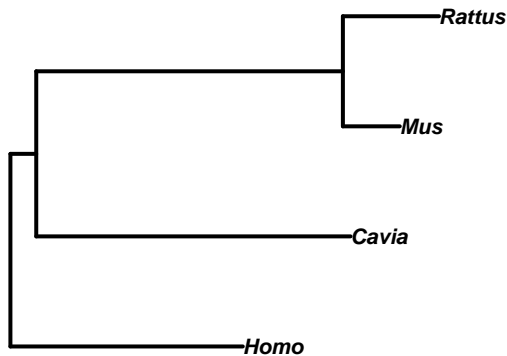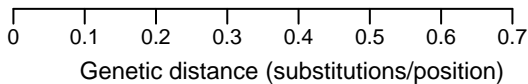

Mus Rattus Cavia Homo  
G T A T C A C T G T G C C T C T T . . . . . G T C C T C C T G T A C C T C C T G A T C C T C A A T G C C T T C T G G G T . . . . . 57  
G T G A G A A T G G A G C A T G T . . . . . G T C C T T C T G A C T C C T G A T C C T G T A A T G G C T T C T G G G T . . . . . 96  
G T G A G C C C C A C C C G T . . . . . G A C C C T C A G T C C T A G G . . . . . 33  
G T G A G C C C A C C T G A G C T C C C A T C C C T G C C T G G C G T C G G C C A G A G T C C T G G . . . . . 51

Mus Rattus Cavia Homo  
C C G G A G C T G G G A T C G A A C C C A G G C C T T G C G C T G C C A G G C A A G G C T C T A G C G C T G A G C T A A A T C C C A A C C . . . . . 87  
G A G C T T G G G C T T T C C A G A G C A A G T C C A C G . . . . . 206  
G G C G T G A G C T . . . . . G T C G T T G A G C T T C A G T T C C A A T T T T A A G G C A C T T C T C 87

Mus Rattus Cavia Homo  
C T T C C C T G T C C . . . . . G T C C T C C C T C A T C C C C T C C C A A G A G A T T A A . . . . . 152  
G A G G C A T G G T G C C A . . . . . G T C C T C C C T C A T C C C C T C C T A G C A G T T G A A . . . . . 275  
C A C T C G T G A T C C C A A G C A A G T C T G A C T T T T G C A C C G A A T G G C A G A G A G G A A T T T C C T T T T G T T . . . . . 150  
C A T T C A T C C C T G G C C T C G T T T C C T G G C C A C C C A C G A A A G T G A G G . . . . . G T T T T T C T T G A C C C A G G C T A T G T T G T G A G G C T . . . . . 166

Mus Rattus Cavia Homo  
A C C C T G C C T C C C T T A G C T C T . . . . . G A C C C C T A G . . . . . 183  
A C C C T G C C T C C C T T A G C T C T . . . . . G A C C C C T A G C . . . . . 306  
G G C C T T G A A C T C A T T G A T C C T T G S C T A . . . . . G C T C C C A G T A G T C C G A G A C A A A G C C A G A C T T C T C A C C A G G C T C A A C A A G . . . . . 244  
C T G C T A C C C T C C C T A G C T C A A A A T C C T C C C A T . . . . . G C T C C C A G T A G C C G A G A C A A A G C C A G A C T T C T C A C C A G G C T C A A C A A G . . . . . 250

Mus Rattus Cavia Homo  
G T G C C C T C A G A T C T G T G T C T G T G A T C T C T G C T . . . . . G A A T C C A T G T T T C C A T G C C A G C T G A G S C C T C C C C C T T G A G G A . . . . . 254  
C T G C C C C A G A T C T A T G A T C C T A T . . . . . T C T C T G C T . . . . . G A A G C C A T G T T T C C C C C C A G C T T A A G C C C T C C T C A C A G A . . . . . 385  
A G T G C A A A C C T G C T C C T G G A C C G C T . . . . . G C T C C C A T G G C T C T G A G T G C C T G A G G G C T G G A T G C C C A G C A G G G T T G A C T T G T . . . . . 344  
G G . . . . . C C G C A G G C T G A G A A G C C C G T G G C T C C A C T T C A C A C T T C A C T T C C C A G G C C T A G C T G . . . . . C T T C C A A G C A C T . . . . . 329

Mus Rattus Cavia Homo  
A C C C C T C T G A T C C C C T C A G C A A A G A G C C C A A G T G C C A T C C T G A T C C T . . . . . G C T G A G C A T A G T A C C A G C A C C A C T C A G T G G C C A C T T T T G G A T G T T T G A T A T T A T . . . . . 374  
A G C C C T C C T T G A T C C C C T C A G C C T A G A G C C C A A A G T G C C A C C C T G A C C C T C C T G G A C T G C A G C A T C C C C T A C C A A A C A G C A A C T . . . . . T C T G A G G T T A A T . . . . . 484  
T A T T C C T G T G T C T G A G C C A T G A . . . . . A A A C G G T T T G C T G G C C A A A G G A G C T C T G G C T C C C G C T . . . . . 415  
T C C C C T T T G T T C C C T C T G C A A T T A . . . . . G A T G C T A A T C C C T . . . . . 371

Mus Rattus Cavia Homo  
T T G T A A A T C . . . . . A A C T A A T C T T T T C G G A G T A A A A A G G G A C T C A C A T T T C T A T . . . . . C T T C T G G G T T C T . . . . . G G G A C T G G G A G T G A C T . . . . . 460  
T T G T A A A T G T A A T G G T T G A T G C T T T T C G G T T A A A A A G G G A C T T A C A T T . . . . . C T T C T G G G T T C T . . . . . G A G G C T G G G A G T G A A C T . . . . . 570  
T T T T T T T T T T T G A G A T G G A T C T A C T T C T T T G . . . . . C . . . . . C C A G G A G G A A G C A A C A A A G G A G C T . . . . . 496  
T T T T T T T T T T T G A G A T G G A T C T A C T T C T T T G . . . . . C . . . . . C C A G C T G G A T G C A A T G A C A T G A T C C G G C T A C . . . . . 442

Mus Rattus Cavia Homo  
G G G T C C T C T G . . . . . T A G T C C T C T G . . . . . A G G G C T G T G T . . . . . G T A T T T C A G T C C T G A G C C A T C T T T G C T C T T T G T G T . . . . . 525  
G C A G T C A G C A G C A A A T T G G C T . . . . . T A A T C T . . . . . T T G C A B C C A T T A B C C A G A A T G T G A G C T G T G T G T G T C A C A G C T G C A G A C C C T C A G C C C C T A C T T T . . . . . 597  
T G A A G C T C T G C T G C A B G T T C A A G G A T T C T C T G C T G A G C T C T G A T A G C T G G A T A C A G . . . . . G T G G C A C A A C C A T G C C T G T C T A A T T T T T C T A T T T T . . . . . 546

Mus Rattus Cavia Homo  
T T C T G A A G A C A G T A T C T C . . . . . C C C A G G C C C G G T A G C C T G A C . . . . . C C T G C C T G T G A . . . . . C C A G G C T G C C C T C A A A C T T T G T G A G . . . . . G C C C C T C C T . . . . . 609  
T G T T T G A G A C A G T A T C T C . . . . . C C A G G C C T G C A G C C A T G A C . . . . . C C T G G C T G A G A . . . . . T C A G G C T G C C T C A A A C T T G A C G A G C C C T C T A G C A C C T G C T . . . . . 730  
T A G A A A G A T G G G T T T C A G T G T G T G C C A G C C T G C T C T G A T T A T A G T A A C . . . . . C T T G G G A A A T A T G C A T C C T C C T G G C C T G C C C T G C C A A A G T G C T G G A T T A T T A G G C A T G A G C . . . . . 654

Mus Rattus Cavia Homo  
T T C . . . . . 612  
T T C . . . . . 733  
A C T G C A G C A C C T C T G G G T C T T C C C C T G G G C G G A A T C T G C T C C T G G T T C A T C T G T G T A T T G A T A C C C T T G G C A T T T G G C A T A C T C T G A C A T G G C C T T T A T A T G A T C . . . . . 805  
A C G . . . . . A C G C C A G C C T G A T G A C T T T T T A T A T C A G T . . . . . 688

Mus Rattus Cavia Homo  
A A G C A C T C G A C T C A C A . . . . . G G C T G C C C A T G C C C A G C T C C A A G A A A C A . . . . . 661  
T A A G C A C T G G A T T C A G A . . . . . A G C T G C C C C T A T G C C C A G C T C C C T A G A A A A C A . . . . . 782  
C C C A A G C T A A C G A T T T A T C T S A G A C C T C T G C A T G A T C G A S C C A G G A A G T G G . . . . . A G C T G C C C C T A T G C C C A G C T C C C T A G A A A A C A . . . . . 901  
T G G G A A A A A A A G G C T T T A T T G A B G C T C C T G C A G C C A B S C A G C T G G G A C A C A C T G T A C C A G C C C T G C C T C C . . . . . A G G C T A G C T T T G C T G G C C T T T C T T C T T C C . . . . . 798

Mus Rattus Cavia Homo  
T C C T C C C C T T G C A G . . . . . 675  
T G T T T C C C T T G C A G . . . . . 797  
A C C A T C T A C C T . . . . . C T T C T C C T T C C A G . . . . . 927  
G A C A C A C T C C T G C C T C A C C C T T T C C A G . . . . . 826



ENSMUSG00000009292 intron 14

Description: Transient receptor potential cation channel subfamily M memb (Trpm2)  
 Intron number: 14  
 Mouse chromosome: 10  
 Upstream exon length: 146  
 Downstream exon length: 113  
 Mouse intron length: 994  
 Intron alignment length: 1141  
 Total murinae branch length: 0.20666  
 K\_score: 0.05854  
 Scaling factor: 0.66372

ENSMUSG00000009292 exon 14 (ORF 2)

|        |                                                                                    |    |
|--------|------------------------------------------------------------------------------------|----|
| Mus    | GCGTCTTCACTGAGTGTACAGGAAGGATGAGGAAAAGAGCCCAAGAACTGCTTGTCCGTGTGTCTGAGGCCTGGGGGAAAG  | 80 |
| Rattus | GTSTCTTCAACCGAGTGTACAGAAAGGATGAGGAAAAGAGCCCAAGAACTGCTTGTCCGTGTGTCTGAGGCCTGGGGGAAAG | 80 |
| Cavia  | GGGTCTTCAACCGAGTGTACAGGAAGGACGAGGAAAGAGCCCAAGAACTGCTTGTCCGTGTGTCTGAGGCCTGGGGGAAAG  | 80 |
| Homo   | GGGTCTTCAACCGAGTGTACAGGAAGGACGAGGAAAGAGCCCAAGAACTGCTTGTCCGTGTGTCTGAGGCCTGGGGGAAAG  | 80 |

  

|        |                                                                     |     |
|--------|---------------------------------------------------------------------|-----|
| Mus    | ACCACCTGCCTGCAGCTGGCCCTAGAGGGCCAAGGACATGAAATTCGTGTCTCATGGAGGCATCCAG | 146 |
| Rattus | ACCACCTGCCTGCAGCTGGCCCTAGAGGGCCAAGGACATGAAATTCGTGTCTCACGGAGGATCCAG  | 146 |
| Cavia  | ACCACCTGCCTGCAGCTGGCCCTAGAGGGCCAAGGACATGAAATTCGTGTCTCACGGAGGATCCAG  | 146 |
| Homo   | ACCACCTGCCTGCAGCTGGCCCTAGAGGGCCAAGGACATGAAATTCGTGTCTCACGGAGGATCCAG  | 146 |

ENSMUSG00000009292 exon 15 (ORF 0)

|        |                                                                                   |    |
|--------|-----------------------------------------------------------------------------------|----|
| Mus    | GCTTTCCTAACCAAGGTGTGGTGGGGCCAGCTCTCTGTGGACAATGGCCTGTGGAGGATCATCCTGTGCATGCTGGCCTT  | 80 |
| Rattus | GCTTTCCTAACCAAGGTGTGGTGGGGCCAGCTCTCTGTGGACAATGGCCTGTGGAGGATCATCCTGTGCATGCTGGCCTT  | 80 |
| Cavia  | GCTTTCCTAACCAAGGTGTGGTGGGGCCAGCTCTCTGTGGACAATGGGATGTGGCAAGTCCATCCTGTGTATGCTGGCCTT | 80 |
| Homo   | GCTTTCCTAACCAAGGTGTGGTGGGGCCAGCTCTCTGTGGACAATGGGCTGTGGCCTGTGTATGCTGGCCTT          | 80 |

  

|        |                                    |     |
|--------|------------------------------------|-----|
| Mus    | CCCGCTGCTCTTCAACCGGCTTCATCTCCTTCAG | 113 |
| Rattus | CCCTCTGCTCTTCAACCGGCTTCATCTCCTTCAG | 113 |
| Cavia  | CCCGCTGCTCTTCAACCGGCTTCATCTCCTTCAG | 113 |
| Homo   | CCCGCTGCTCTTCAACCGGCTTCATCTCCTTCAG | 113 |

ENSMUSG00000009292\_intron\_14

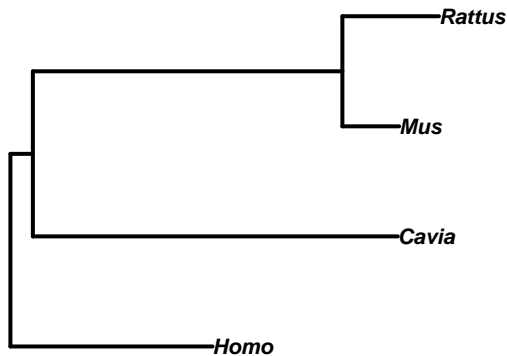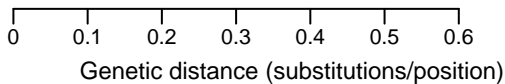



ENSMUSG00000039662 intron 1

Description: Protein-S-isoprenylcysteine O-methyltransferase (Icmt)

Intron number: 1

Mouse chromosome: 4

Upstream exon length: 195

Downstream exon length: 89

Mouse intron length: 1116

Intron alignment length: 1263

Total murinae branch length: 0.16615

K\_score: 0.0639

Scaling factor: 0.66729

ENSMUSG00000039662 exon 1 (ORF 0)

|        |                                                                                   |     |
|--------|-----------------------------------------------------------------------------------|-----|
| Mus    | CGAGGGCGCGCCTCAGCCTCGCTACATTTCCTGGGGCGCTCGGTGCTCGCTCTGCCGCTGCTCAGCGCGCGCGCGCTGC   | 80  |
| Rattus | CGAGGGCGCGCCTCAGCCTCGCTACCTTCCTGCTGGTGGCTCGGTGCTCGCTCTGCCGCTGCTCAGCGCGCGCGCGCTGC  | 80  |
| Cavia  | CGAGGGCGCGCCTCAGCCTCGCTACCTTCCTGCTGGTGGCTCGGTGCTCGCTCTGCCGCTGCTCAGCGCGCGCGCGCTGC  | 80  |
| Homo   | TGAGGGCGCGCTCAGCCTCGCTACCTTCCTGCTGGTGGCGCTCGGTGCTCGCGCTGCCGCTGCTCAGCGCGCGCGCGCTGC | 80  |
| Mus    | AGGGCCGCACCGGGCTGGCGCTCTACGTGGCCGGACTCAACGGCGCTGCTGCTGCTACTCTACCGGGCGCGCGCGCTACCA | 160 |
| Rattus | AGGGCCGCACCGGGCTGGCGCTCTACGTGGCCGGACTCAACGGCGCTGCTGCTGCTACTCTACCGGGCGCGCGCGCTACCA | 160 |
| Cavia  | AGGGCCGCACCGGGCTGGCGCTCTACGTGGCCGGACTCAACGGCGCTGCTGCTGCTACTCTACCGGGCGCGCGCGCTACCA | 160 |
| Homo   | AGGGCCGCACCGGGCTGGCGCTCTACGTGGCCGGACTCAACGGCGCTGCTGCTGCTACTCTACCGGGCGCGCGCTACCA   | 160 |

ENSMUSG00000039662 exon 2 (ORF 0)

|        |                                                                                  |    |
|--------|----------------------------------------------------------------------------------|----|
| Mus    | ATAGCCATCAGAGCTTGTTCCTTGGCTTTGTGTTGGCTGTTGGTGTGCTGCTAAAGTTTCAAGCCAGTCCTCTTGAATCA | 80 |
| Rattus | ATAGCCATCCGAGCTTGTTCCTTGGCTTTGTGTTGGCTGCGGCGTGCTGCTAAAGTTTCAAGCCAGTCCTCTTGAATCA  | 80 |
| Cavia  | ATAGCCATCCGAGCTTGTTCCTTGGCTTTGTGTTGGCTGCGGCGTGCTGCTAAAGTTTCAAGCCAGTCCTCTTGAATCA  | 80 |
| Homo   | ATAGCCATCCGAGCTTGTTCCTTGGCTTTGTGTTGGCTGCGGCAAGCTGCTAAAGTTTCAAGCCAGTCCTCTTGAATCA  | 80 |
| Mus    | CTTTGGCTG                                                                        | 89 |
| Rattus | CTTTGGCTG                                                                        | 89 |
| Cavia  | CTTTGGCTG                                                                        | 89 |
| Homo   | CTTTGGCTG                                                                        | 89 |

ENSMUSG00000039662\_intron\_1

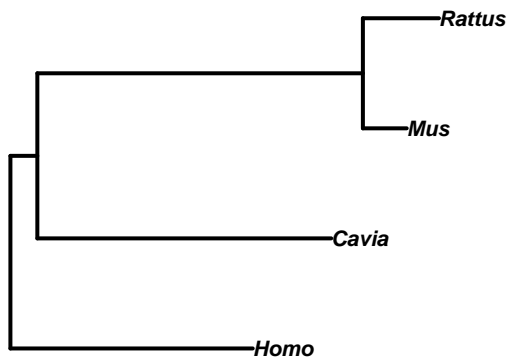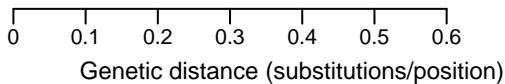



ENSMUSG00000032079 intron 2

Description: Apolipoprotein A-V Precursor (Apoa5)

Intron number: 2

Mouse chromosome: 9

Upstream exon length: 100

Downstream exon length: 967

Mouse intron length: 442

Intron alignment length: 564

Total murinae branch length: 0.23879

K\_score: 0.05467

Scaling factor: 0.66747

ENSMUSG00000032079 exon 2 (ORF 2)

|        |                                                                                                   |
|--------|---------------------------------------------------------------------------------------------------|
| Mus    | <b>TGTTTCGCAAGCAGCTCAGGCACGGAAAGAGCCTCTGGGACTACTTCAGCCAAACAGTTGGAACAAAGGCGTGATGGG</b> - - - 76    |
| Rattus | <b>TGTTTTCGCAACTGTACAGGCAGGGAAAGAGCTTCTGGGAGTACTTCAGCCAGAACAGGCAAGGCAGAAAGGCATGATGGG</b> - - - 76 |
| Cavia  | <b>CATTGCTCAGCCAGCCAGGCACAGAAAGAGCTTCTGGGAGTACTTCAGCCAGAACAGGCAAGGCAGAAAGGCATGATGGG</b> - - - 80  |
| Homo   | <b>CGTTTTTCGGCCAGCCAGGCACGGAAAGAGCTTCTGGGACTACTTCAGCCAGAACAGGCAAGGCAGAAAGGCAGGTTGGAGGAAG</b> 80   |

  

|        |                                             |
|--------|---------------------------------------------|
| Mus    | - - CCAGCCACAGAAAGCTGGCACAGGA- - - - - 100  |
| Rattus | - - CCAGCAGCAGAAAGCTGGCACAGGA- - - - - 100  |
| Cavia  | <b>ATCCAGCAGCAGAAAGCTGGCACAGGACACCG</b> 112 |
| Homo   | <b>ATCCATTAGCAGAAAGATGGCTGCCGAGCCCG</b> 112 |

ENSMUSG00000032079 exon 3 (ORF 1)

|        |                                                                                             |
|--------|---------------------------------------------------------------------------------------------|
| Mus    | <b>GAACTGAAAGGCAGCTTCGAGCAAGACCTCTACAAATATGAACAATTACCTAGAAAAGCTGGGACCCCTTGAGAGGGCCT</b> 80  |
| Rattus | <b>GAGCCTGAAAAGTACGCTTCGAGCAAGACCTCTACAAATATGAACAATTTCTAGAAAAGCTGGGACCCCTTGAGAGAGCCT</b> 80 |
| Cavia  | <b>GAGGCTGAAAAGACAGCTTCGAGCAGGACCTCAGCAGATATGAACAATTTCTGGAAGAGCTGGGCCCTGAGTGGGAGG</b> 80    |
| Homo   | <b>GACCTGAAAGACAGCTTCGAGCAAGACCTCAGCAATATGAACAAGTTCTGGAAGAGCTGAGGCTCTGAG</b> - - - - - 74   |

  

|        |                                                                                              |
|--------|----------------------------------------------------------------------------------------------|
| Mus    | <b>GGAAGGAGCCTCTCTGGCCAGGACCCAGAAAGGCATTCGGAAACAGCTGCAGCAGGAGCTGGGGGAAGTGAAGT</b> 160        |
| Rattus | <b>GGAAGGAGCCTCTCTGGCTGGCACAGGATCCAGAAAGGCATTCGGAAAGCAGTTGCAGCAAGAGCTGGAGGAAGTGAAGCA</b> 160 |
| Cavia  | <b>GGAACAGCCTCTCTGAGCAGGAGGAGGAGCAGCAGCTGCAGCAGGAGCTGGAGGAGTGGAGGAGGTGGGGCT</b> 154          |
| Homo   | <b>GGAGCTGAGGCTCTCTGGCTCCACAGGACCCGGTGGGATTCGGCGGCAGCTGCAGCAGGAGTTGGAGGAGGTGAAGCT</b> 154    |

ENSMUSG00000032079\_intron\_2

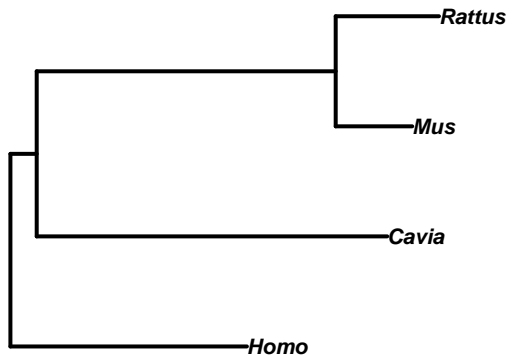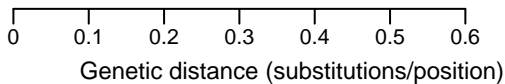

|        |                                                                                                                                                                                                                               |     |
|--------|-------------------------------------------------------------------------------------------------------------------------------------------------------------------------------------------------------------------------------|-----|
| Mus    | G T A A G T A G C C T G G G C A A G G C - - T C T G C T G A G G C C A G A G A C A G C C T A C T G T G G A T G A T . . . . . C C C T T G G C T C T G T G G T A A C A T G G A A G C T G A A G C A                               | 93  |
| Rattus | G T A A G T A G C C T G G G C A A G G C - - T C T G T G A G G T A C G A G A C A G C C T A C T G T G G A T G A T . . . . . T C C T C A G C T C G G T A G T T A A C A G A G A C T C C A C T G A                                 | 93  |
| Cavia  | G T G A G T A G C C A G G G C A A G G C A T G G C C T G A G G C G A T G A G A C A G C T G G G . . . . . C C C A A G C C T G . . . . .                                                                                         | 90  |
| Homo   | G T G A G T G C C A G G G C A A G G G C T G T A G G C G A G G S A G A G A C A G C T G G G C A T G C C A T G A T G A C C T G C C T G C T G C C T A A G C T C T G T G C C G C T G C T G C G A B A G A G C A M                   | 110 |
| Mus    | A . . . . . C C A G C C C T C C C T A T A G A A C C A A A G A C A C C T C A G T A T C T T G C G A G C C T C T T G T C C A A G T T T C T G C T G C C . . . . .                                                                 | 164 |
| Rattus | . . . . . C C A G C C C T C C C T A T A G A A C C A A A G A C A C C T C A G T A T C T T G C G A G C C T C T T G T C C A A G T T T C T G C T G C C . . . . .                                                                   | 93  |
| Cavia  | . . . . . C C A G C C C T C C C T A T A G A A C C A A A G A C A C C T C A G T A T C T T G C G A G C C T C T T G T C C A A G T T T C T G C T G C C . . . . .                                                                   | 108 |
| Homo   | A G G A G C G G T G C T A G C C T C T C T G C A G A T C C C G G C C A T C C T G G C C T C T T A G C C C C T C C T C C T A T G G G T G T G C T T G C C G G C T G . . . . .                                                     | 220 |
| Mus    | . . . . . C A T G G C A C C T G A G A T A G C A T C C C A . . . . . C A G A A T G A C A A G A T G G T G T G A T C T T G C C G T C T G T G T . . . . . G T G A C A C C                                                         | 234 |
| Rattus | . . . . . C A T G G C A C C T G A G A T A G C A T C C C A . . . . . T A G A A T G G C A A G G T G G T G T G A C T A T T G C C A T C C G T A T G A C A C C T T C T T G G A T G G G T G A C A C C                               | 160 |
| Cavia  | . . . . . A G T G A C C T G T A A . . . . . G C T G T G C C . . . . . G A G G T G C T C C A A T T C T C C A G C T G T G T . . . . . G C A C T A T G T . . . . .                                                               | 136 |
| Homo   | G A G G G C G C G C A C C T G C G A T C A T C C G G A G G A C G C C G C T G C A G T C C C A G A A T C A A G G A T G A T G T G C C . . . . . G C A C T A T G T . . . . . T                                                     | 300 |
| Mus    | T T C T T G G A T G G T A T T G T A A G A C C G A A T . . . . . G C C A T T T T G T C T . . . . . T C T G A A T G T A A C A A T G A A G T T G G C . . . . . T G G G T C A G G A C T A A A G A L C C A G G C T C T G G G C C   | 329 |
| Rattus | T T C T T G G A T G G T A T T G T A A G A C C G A A T . . . . . G C C T T T T G T C C . . . . . C T G A A T G T A A T G A T G C A G T T G G T . . . . . T G G G T C A G G A C T A A A G A C C T A G G C T C T G A G C C       | 256 |
| Cavia  | . . . . . A G T G A C C T G T A A . . . . . G C T G T G C C . . . . . T C C A T G T G G A C T T G G T G T T G T G T . . . . . C A G G C T A G G A C T A G A G A G C C T G G G T G G G A G                                     | 218 |
| Homo   | T C T T T G G A G A T C T G T A G G T C T G A T T T G T A T G G G C A A T G . . . . . G C T T G T C C . . . . . T T G T G G G T G A G T T G T A T G G G . . . . . C A G G C T A G G A C A A G A G C C T C A A C C T G G G C C | 406 |
| Mus    | C A - C T C G T C C T G C C T G . . . . . G C T T C T C C A A A A T A T T A G T G T C C A C A G C T T T G G G A A A G G G A G A T . . . . . T T C A A T G C T A G C A G I C T A A T G G C C T G A T T C T C T G C T           | 428 |
| Rattus | C A - T T C T T C C T G C C C T G . . . . . G T T T G C C A G A S T A T G G T G T C C A C A G C T A A G G G A A A G G A G A T . . . . . T T C A A G G C T A G C G G T C T A A T G G C C T G S T . . . . . T C T G T C T       | 353 |
| Cavia  | C C - A C G G C C A A C C C A T A T G C T A A G T T T C G C T A G . . . . . A T C A G T C C T G A G A T C C C C A G G G A A A A G A G A T . . . . . G A T G G G T T A G C G C T T G A T G G T C T G . . . . .                 | 311 |
| Homo   | C A A C G C C C T G C T T G . . . . . G T T C C C C A G A G A T C A G T G C G C G A T G A C T T T G G G A C A A A G A G A T G A T T G C A G G C T A G C A G T C T G A C G G C C T G G A . . . . . T A T C T                   | 504 |
| Mus    | T T C T C C T T C C C A G                                                                                                                                                                                                     | 442 |
| Rattus | T T C T C C T T C C C A G                                                                                                                                                                                                     | 367 |
| Cavia  | T T C T C T T T C C C A G                                                                                                                                                                                                     | 324 |
| Homo   | G T G C C C T T C C C A G                                                                                                                                                                                                     | 518 |

ENSMUSG00000053024 intron 5

Description: Contactin-2 Precursor (Cntn2)

Intron number: 5

Mouse chromosome: 1

Upstream exon length: 210

Downstream exon length: 100

Mouse intron length: 281

Intron alignment length: 338

Total murinae branch length: 0.20933

K\_score: 0.07051

Scaling factor: 0.66776

ENSMUSG00000053024 exon 5 (ORF 2)

|        |                                                                                |    |
|--------|--------------------------------------------------------------------------------|----|
| Mus    | GATGGGCGTCACTTCGTGTCCAGACACAGGGAACCTGTACATCGCCCGCACCAATGCCTCGGACCTGGGCAACTACTC | 80 |
| Rattus | GATGGGCGTCACTTCGTGTCCAGACACAGGGAACCTGTACATCGCCCGCACCAATGCCTCGGACCTGGGCAACTACTC | 80 |
| Cavia  | GATGGGCGTCACTTCGTGTCCAGACACAGGGAACCTGTACATCGCCCGCACCAATGCCTCGGACCTGGGCAACTACTC | 80 |
| Homo   | GATGGGCGTCACTTCGTGTCCAGACACAGGGAACCTGTACATCGCCCGCACCAATGCCTCGGACCTGGGCAACTACTC | 80 |

  

|        |                                                                                  |     |
|--------|----------------------------------------------------------------------------------|-----|
| Mus    | TTGCCTTGGCTACCAGCCACCTGGACTTCTCCACCAAGAGCGTCTTCAGCAAATTCGGCAGCTCAACCTGGCTGCTGAA  | 160 |
| Rattus | TTGTTTGGCTACCAGCCACATGGACTTCTCCACCAAGAGCGTCTTCAGCAAATTCGGCAGCTCAACCTGGCTGCTGAA   | 160 |
| Cavia  | CTGCCTTGGCTACCAGCCACATGGACTTCTCCACCAAGAGCGTCTTCAGCAAATTCGGCAGCTCAACCTGGCTGCTGAA  | 160 |
| Homo   | CTGTTTGGCTACCAGCCACATGGACTTCTCCACCAAGAGCGTCTTCAGCAAATTCGGTTCAGCTCAACCTGGCTGCTGAA | 160 |

ENSMUSG00000053024 exon 6 (ORF 2)

|        |                                                                                     |    |
|--------|-------------------------------------------------------------------------------------|----|
| Mus    | ATCCTCGACTCTTTGCTCCAGTATCAAAGCCCGGTTCCCGCCAGAGACGTACGCACCTGTTGGGCAGCAGGTCAACCTG     | 80 |
| Rattus | ATCCCCGACTCTTCGCTCCAGTATCAAAGGCTCGGTTCCCGCCAGAGACCTACGCACCTAGTTGGGCAGCAAGTCAACCTG   | 80 |
| Cavia  | ATCCCCGCTTTTTCACCCAGCATCAAAGGCCCGGTTCCCTGCAGAGACCTATGCACCTGTTGGGCAGCAGGTCAACCTG     | 80 |
| Homo   | ATATCCCCGCTCTTTGCACCCAGCATCAAAGGCCCGGTTCCGAAGCAGAGACCTATGCACCTGTTGGGCAGCAGGTCAACCTG | 80 |

  

|        |                       |     |
|--------|-----------------------|-----|
| Mus    | GAGTGCCTTTGCCCTTTGGAA | 100 |
| Rattus | GAGTGCCTTTGCCCTTTGGAA | 100 |
| Cavia  | GAGTGCCTTTGCCCTTTGGAA | 100 |
| Homo   | GAGTGCCTTTGCCCTTTGGAA | 100 |

ENSMUSG00000053024\_intron\_5

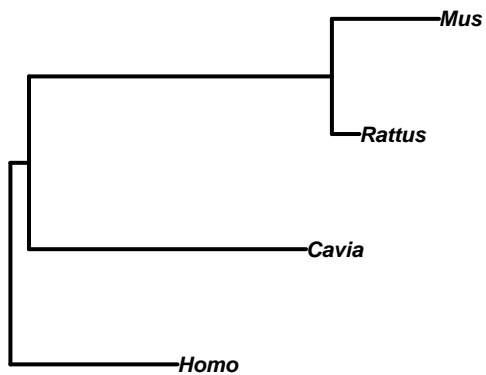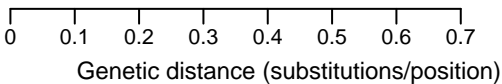

```

Mus      GTCAGGATC-----TAGGTTAATGGA--GGCTGAAAGGGTCAATAGGCCTTGGAGAAAAGGTATCTACC--AAGCTTAAGAATTGCAGCTCAGGATATA 92
Rattus  GTCAGGATC-----TAGGTTAATGGAGGGGGCTGAAAGATTACAGGGCTTGGGAAATGGTCTCCACC--AAGCCTAAGAACCAGCAGCTCA-----AT 89
Cavia   GTCAGGCTCTTTGCGGAGTAAAGGAGGAGG-----GGGAGGAGG-----TTGGAAAAAGGATTCCTTTGTAATGGTAAAGAGCAGCTCATGGCCAT 84
Homo    GTCAGGCTTT--GGCGAGGGCTGGTGCAGCAGGGGAAGCTGCAAGGGTCAAGCGGGAATAGGAAAAAGGTTTTTCCTTTGAGATTGCAAGATCAGGCTGCAGGGCACT 106

Mus      -----GAGGTCCTGCTGCCGGGCTCAGATCCTTGCCCGAGGCCCCCG-AGAAAAGAGAGAACTTTGGAGATTCCAAAATATTTATGTTGTTGA 178
Rattus  -----TCGGGCGGCTGCGAGGCTCAGAGCCTTGCCCGAGGCCCGGA-CGGAAAAGGGAATGTTGGAGATTCCAAAAGATTTATTTGGAGA 175
Cavia   -----GAGGTCCTGCTGCCGGGCTCAGATCCTTGCCCGAGGCCCCCG-AGAAAAGAGAGAACTTTGGAGATTCCAAAATATTTATGTTGTTGA 180
Homo    GATTCCAAGGCCCTGAGCAGCCGAGATCCTCCTGCTTCAAAATCTTAGGCCCTTGCCCGAGGCCCTGAAA-----GGAGATTCCACAAGCTTGCCTAGACA 198

Mus      TCTGTGAACCTTTGGAAGGCAT-----GGGCCCTAATACAAAG---CACCTCCCTGGAGCGCTTTGCATGTGTTCAACAGTCAATCTCTCTCTCCCTCCAC 273
Rattus  TTTCAAGAGCTTTGGAAGGCAT-----GGGCCCTA-CACAAAG---CACCTCCCTGGAGCTTTTGTATGATTCAACAACCTCTCTCTCTCTCCCTCCAC 264
Cavia   -CACAAAGCTCCAAAGGCTCTGCTTCTGAAATCCTGAGCACCAGAGCCAAGCCCTCCCTGGAGTCA-CGGCATGTGATTTGCAAGGCCCTTCTCTCC- 277
Homo    -GAGTTGGCTCTGAAAGGTGCTGAGATCCCATTCACAGGGCAGCACCTGA-----CCTGGAGTCACTGCACTGATTTGTAAGCCCTCTCTCC----- 286

Mus      CCCCCCAG 281
Rattus  -----CAG 267
Cavia   -----CAG 280
Homo    -----CAG 289

```



ENSMUSG00000015971 intron 2

Description: Actin-related protein 8 (Actr8)

Intron number: 2

Mouse chromosome: 14

Upstream exon length: 171

Downstream exon length: 111

Mouse intron length: 1260

Intron alignment length: 1772

Total murinae branch length: 0.18658

K\_score: 0.08644

Scaling factor: 0.66793

ENSMUSG00000015971 exon 2 (ORF 0)

|        |                                                                                    |    |
|--------|------------------------------------------------------------------------------------|----|
| Mus    | CAACTTTCATTGTTGTACATACCCAGGTTCAACAACCTCTAAGAATTGGCCGAGCCACAGATACACTTCCGTTCAAGTCTT  | 80 |
| Rattus | CAACTTTTATTGTTGTCATACATCCAGGCTCAACAACCTTAAAGAATTGGCCGAGCCACAGACACTCCAGCCAGGATT     | 80 |
| Cavia  | CAACTTTATTGTTGTCATACATCCAGGCTCAACAACCTTAAAGAATTGGCCGAGCCACAGACACTCCAGCCAGGATT      | 80 |
| Homo   | CAACTTTCATCAATTGTCATACATCCAGGTTCAACAACCTTAAAGGATTGGTCGAGCCACAGACACTCTTCTTGCCAGCATT | 80 |

  

|        |                                                                                  |     |
|--------|----------------------------------------------------------------------------------|-----|
| Mus    | CTCACGTCATTGCACTGAAGACACAACAACAAGGGCAGCCCTGTACAAGGACAACCTGGCTCCTAAGGGAAGGACTAAAT | 160 |
| Rattus | CTCACGTCATTGCTCTGAGACACAACAACAAGGGCAGCCCTGTACAAGGACAACCTGGCTCCTAAGGGAAGGACTAAAT  | 160 |
| Cavia  | CTCACGTCATTGCTCTGAGACACAACAACAAGGGCAGCCCTGTACAAGGACAACCTGGCTCCTAAGGGAAGGACTAAAT  | 160 |
| Homo   | CTCACGTCATTGCCCGAAGACACAACAACAAGGGCAGCCCTATACAAGGACAAGTTGGCTCCTAAGGGAAGGACTAAAT  | 160 |

ENSMUSG00000015971 exon 3 (ORF 0)

|        |                                                                                     |    |
|--------|-------------------------------------------------------------------------------------|----|
| Mus    | AAACCTGAAAGTAAATGAACAAAGACAAAATGGCCTTAAAATGGTGGATCAAGGCAATATGGTCTAAAAAAGATGTCAAACGG | 80 |
| Rattus | AAACCTGAAAGTAAATGAACAAAGACAAAATGGCCTTAAAATGGTGGATCAAGGCAATATGGTCTAAAAAAGATGTCAAACGG | 80 |
| Cavia  | AAACCTGAAAGTAAATGAACAAAGACAAAATGGCCTTAAAATGGTGGATCAAGGCAATATGGTCTAAAAAAGATGTCAAATGG | 80 |
| Homo   | AAACCTGAAAGTAAATGAACAAAGACAAAATGGCCTTAAAATGGTGGATCAAGGCAATATGGTCTAAAAAAGATGTCAAATGG | 80 |

  

|        |                                  |     |
|--------|----------------------------------|-----|
| Mus    | TACAAGGCGGATCCCTGTGTCAACCAGAACAG | 111 |
| Rattus | TACAAGGCGGATCCCTGTGTCAACCAGAACAG | 111 |
| Cavia  | TACAAGGCGGATCCCTGTGTCAACCAGAACAG | 111 |
| Homo   | TACAAGGCGGATCCCTGTGTCAACCAGAACAG | 111 |

ENSMUSG00000015971\_intron\_2

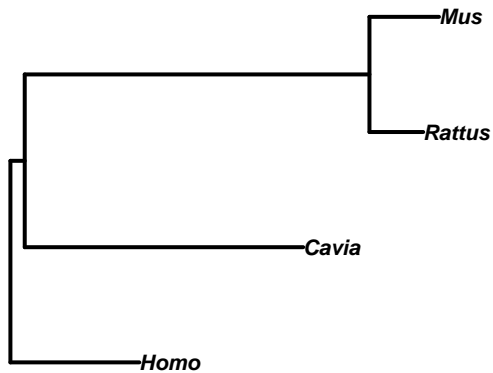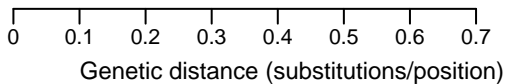



ENSMUSG00000030872 intron 10

Description: ADP-ribosylation factor-binding protein GGA2 (Gga2)

Intron number: 10

Mouse chromosome: 7

Upstream exon length: 126

Downstream exon length: 90

Mouse intron length: 705

Intron alignment length: 1237

Total murinae branch length: 0.17685

K\_score: 0.06964

Scaling factor: 0.66861

ENSMUSG00000030872 exon 10 (ORF 2)

|        |                |                    |                  |               |               |                |       |    |
|--------|----------------|--------------------|------------------|---------------|---------------|----------------|-------|----|
| Mus    | CGGAGATTCTTCAA | GCAAATGACCTTCTCACA | CAGGGG           | GTTTGGCTGT    | ACAAACAGGTGGT | GGAGGGCCGAGTTA | GTGCT | 80 |
| Rattus | CGGAGATTCTTCAA | GCAAATGACCTTCTCACA | CAGGGG           | GTTTGGCTGT    | ACAAACAGGTGGT | GGAGGGCCGAGTTA | GTGCT | 80 |
| Cavia  | CGGAGATTCTTCAA | GCAAATGACCTTCTCACA | CAGGGG           | GTTTGGCTGT    | ACAAACAGGTGGT | GGAGGGCCGAGTTA | GTGCT | 80 |
| Homo   | CGGAATTCTTCAA  | GCAAATGACCTTCTCACC | AAGGAGTTTCTGCTGT | ACAAACAGGTGGT | GATGGAGGGCCG  | GTGCA          | CTTT  | 80 |

  

|        |               |        |               |        |          |        |     |
|--------|---------------|--------|---------------|--------|----------|--------|-----|
| Mus    | GGGAACGCAGTGC | CTGCCG | CAGTGGGAGCC   | ATTCCG | CCG      | CCAGAG | 126 |
| Rattus | GGGAATGCAGTGC | CTGCCG | CAGTGGGAGCC   | ATTCCG | CCG      | CCAGAG | 126 |
| Cavia  | GGGAGCACAGTGA | CCAGCT | CAGTGAAGACAC  | ACCTGT | CTCCAGAG | 126    |     |
| Homo   | GGAAACAGAGTGA | CCAGCT | CATTGGGAGACAT | CCCTGT | CTCCAGAG | 126    |     |

ENSMUSG00000030872 exon 11 (ORF 2)

|        |               |            |         |        |          |          |          |          |        |        |      |       |    |
|--------|---------------|------------|---------|--------|----------|----------|----------|----------|--------|--------|------|-------|----|
| Mus    | CATTCCCGAATCC | AGAACCCTGT | GGTTGA  | ACTGTC | CACTCATT | GACCTGGA | -----    | 52       |        |        |      |       |    |
| Rattus | TGTTCCCGAGTCC | AGAACCCTGT | GGGAAGA | ACTGCC | CTCATT   | GACCTGGA | -----    | 52       |        |        |      |       |    |
| Cavia  | TCTTCCAGAA    | CCAGCAG    | CAGCAT  | GAAGA  | ATTGCC   | CTTGATT  | GACCTGGA | GGTGGACA | ATTGGC | CCTGAG | GCAG | CTGGG | 80 |
| Homo   | TCTTCCAGAA    | CCAGCAG    | CAGCAT  | GAAGA  | CTGCC    | CTTGATT  | GACCTGGA | GGTGGACA | ATTGGC | CCTGAG | GCAG | CTGGG | 80 |

  

|        |          |           |         |         |          |         |      |    |
|--------|----------|-----------|---------|---------|----------|---------|------|----|
| Mus    | -----    | GACGCC    | ATCTTT  | GTTTCAT | CAGGACCT | GGCAGC  | TTAG | 90 |
| Rattus | -----    | GGCACC    | ATCTTT  | GTTTCAT | CAGGACCT | GGCAGC  | TTAG | 90 |
| Cavia  | TCTGTGGC | ACCATCTTT | GTTTCAT | CAGGAC  | TTGGCA   | GCCTTAG | 123  |    |
| Homo   | ACTGTGGT | GCCATCTTT | GTTTCAT | CAGGAC  | TTGGCA   | GCCTTAG | 123  |    |

ENSMUSG00000030872\_intron\_10

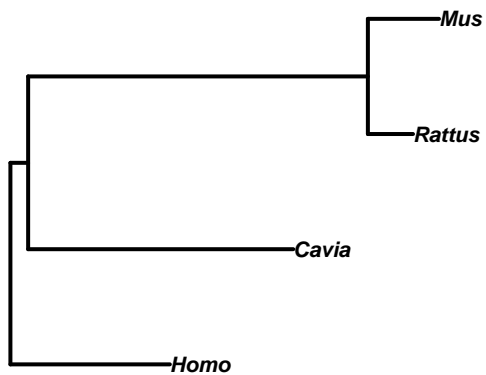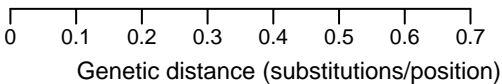



ENSMUSG00000030374 intron 16

Description: Striatin-4 (Strn4)  
 Intron number: 16  
 Mouse chromosome: 7  
 Upstream exon length: 87  
 Downstream exon length: 170  
 Mouse intron length: 1091  
 Intron alignment length: 1532  
 Total murinae branch length: 0.17999  
 K\_score: 0.06173  
 Scaling factor: 0.67261

ENSMUSG00000030374 exon 16 (ORF 2)

|        |   |   |   |   |   |   |   |   |   |   |   |   |   |   |   |   |   |   |   |   |   |   |   |   |   |   |   |   |   |   |   |   |   |   |   |   |   |   |   |   |   |   |   |   |   |   |   |   |   |   |   |   |   |   |   |   |   |   |   |   |   |   |   |   |    |
|--------|---|---|---|---|---|---|---|---|---|---|---|---|---|---|---|---|---|---|---|---|---|---|---|---|---|---|---|---|---|---|---|---|---|---|---|---|---|---|---|---|---|---|---|---|---|---|---|---|---|---|---|---|---|---|---|---|---|---|---|---|---|---|---|---|----|
| Mus    | G | T | A | A | A | T | C | T | G | T | G | C | A | T | T | C | C | A | T | G | G | T | G | C | C | A | C | C | T | G | C | C | T | A | G | C | T | G | T | G | G | A | C | C | C | A | A | T | G | G | C | G | T | G | T | T | C | T | T | G | A | T | C | G | 80 |
| Rattus | G | T | A | A | A | T | C | C | G | T | G | C | A | T | T | C | C | A | T | G | G | T | G | C | C | A | C | C | T | G | C | C | T | A | G | C | T | G | T | G | G | A | C | C | C | A | A | T | G | G | C | G | T | G | T | T | C | T | T | G | A | T | C | G | 80 |
| Cavia  | G | T | A | A | A | T | C | C | G | T | G | C | A | T | T | C | C | A | T | G | G | T | G | C | C | A | C | C | T | G | C | C | T | A | G | C | T | G | T | G | G | A | C | C | C | A | A | T | G | G | C | G | T | G | T | T | C | T | T | G | A | T | C | G | 80 |
| Homo   | G | T | A | A | A | T | C | C | G | T | G | C | A | T | T | C | C | A | T | G | G | T | G | C | C | A | C | C | T | G | C | C | T | A | G | C | T | G | T | G | G | A | C | C | C | A | A | T | G | G | C | G | T | G | T | T | C | T | T | G | A | T | C | G | 80 |

  

|        |   |   |   |   |   |   |   |    |
|--------|---|---|---|---|---|---|---|----|
| Mus    | T | C | A | G | G | A | A | 87 |
| Rattus | T | C | A | G | G | A | A | 87 |
| Cavia  | T | C | A | G | G | A | A | 87 |
| Homo   | T | C | A | G | G | A | A | 87 |

ENSMUSG00000030374 exon 17 (ORF 2)

|        |   |   |   |   |   |   |   |   |   |   |   |   |   |   |   |   |   |   |   |   |   |   |   |   |   |   |   |   |   |   |   |   |   |   |   |   |   |   |   |   |   |   |   |   |   |   |   |   |   |   |   |   |   |   |   |   |   |   |   |   |   |   |   |   |   |   |   |   |   |   |   |   |   |    |   |   |    |
|--------|---|---|---|---|---|---|---|---|---|---|---|---|---|---|---|---|---|---|---|---|---|---|---|---|---|---|---|---|---|---|---|---|---|---|---|---|---|---|---|---|---|---|---|---|---|---|---|---|---|---|---|---|---|---|---|---|---|---|---|---|---|---|---|---|---|---|---|---|---|---|---|---|---|----|---|---|----|
| Mus    | G | C | C | A | T | G | A | C | T | G | T | T | C | T | C | T | G | C | G | T | T | A | T | G | G | A | G | C | T | A | G | A | C | A | A | A | A | G | A | C | A | T | G | T | G | T | G | C | A | G | G | A | G | A | T | C | A | C | G | G | C | C | C | A | C | C | G | A | A | G | A | G | C | A  | T | G | 80 |
| Rattus | G | C | C | A | T | G | A | C | T | G | T | T | C | T | C | T | G | C | G | T | T | A | T | G | G | A | G | C | T | A | G | A | C | A | A | A | A | G | A | C | A | T | G | T | G | T | G | C | A | G | G | A | G | A | T | C | A | C | G | G | C | C | A | C | C | G | A | A | G | C | A | T | G | 80 |   |   |    |
| Cavia  | G | C | C | A | T | G | A | C | T | G | T | T | C | T | C | T | G | C | G | T | T | A | T | G | G | A | G | C | T | A | G | A | C | A | A | A | A | G | A | C | A | T | G | T | G | T | G | C | A | G | G | A | G | A | T | C | A | C | G | G | C | C | A | C | C | G | A | A | G | C | A | T | G | 80 |   |   |    |
| Homo   | G | C | C | A | T | G | A | C | T | G | T | T | C | T | C | T | G | C | G | T | T | A | T | G | G | A | G | C | T | A | G | A | C | A | A | A | A | G | A | C | A | T | G | T | G | T | G | C | A | G | G | A | G | A | T | C | A | C | G | G | C | C | A | C | C | G | A | A | G | C | A | T | G | 80 |   |   |    |

  

|        |   |   |   |   |   |   |   |   |   |   |   |   |   |   |   |   |   |   |   |   |   |   |   |   |   |   |   |   |   |   |   |   |   |   |   |   |   |   |   |   |   |   |   |   |   |   |   |   |   |   |   |   |   |   |   |   |   |   |   |     |
|--------|---|---|---|---|---|---|---|---|---|---|---|---|---|---|---|---|---|---|---|---|---|---|---|---|---|---|---|---|---|---|---|---|---|---|---|---|---|---|---|---|---|---|---|---|---|---|---|---|---|---|---|---|---|---|---|---|---|---|---|-----|
| Mus    | G | A | G | G | A | G | C | C | A | T | C | C | A | T | G | C | T | G | C | T | G | C | A | T | G | G | C | T | G | C | C | A | T | G | C | A | T | G | G | T | G | C | T | G | A | T | G | C | C | T | A | G | C | C | A | A | G | G | T | 160 |
| Rattus | G | A | G | G | A | G | C | C | A | T | C | C | A | T | G | C | T | G | C | T | G | C | A | T | G | G | C | T | G | C | C | A | T | G | C | A | T | G | G | T | G | C | T | G | A | T | G | C | C | T | A | G | C | C | A | A | G | G | T | 160 |
| Cavia  | G | A | G | G | A | G | C | C | A | T | C | C | A | T | G | C | T | G | C | T | G | C | A | T | G | G | C | T | G | C | C | A | T | G | C | A | T | G | G | T | G | C | T | G | A | T | G | C | C | T | A | G | C | C | A | A | G | G | T | 160 |
| Homo   | G | A | G | G | A | G | C | C | A | T | C | C | A | T | G | C | T | G | C | T | G | C | A | T | G | G | C | T | G | C | C | A | T | G | C | A | T | G | G | T | G | C | T | G | A | T | G | C | C | T | A | G | C | C | A | A | G | G | T | 160 |

ENSMUSG00000030374\_intron\_16

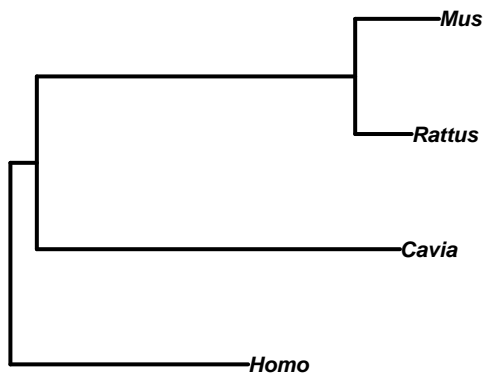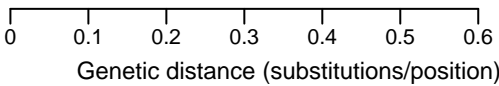



ENSMUSG00000027340 intron 14

Description: Solute carrier family 23 member 2 (Slc23a2)

Intron number: 14

Mouse chromosome: 2

Upstream exon length: 96

Downstream exon length: 233

Mouse intron length: 1298

Intron alignment length: 2615

Total murinae branch length: 0.17163

K\_score: 0.07946

Scaling factor: 0.67333

ENSMUSG00000027340 exon 14 (ORF 2)

|        |   |   |   |   |   |   |   |   |   |   |   |   |   |   |   |   |   |   |   |   |   |   |   |   |   |   |   |   |   |   |   |   |   |   |   |   |   |   |   |   |   |   |   |   |   |   |   |   |   |   |   |   |   |   |   |   |   |   |   |   |   |   |   |   |   |   |   |   |   |   |   |    |    |   |   |   |    |
|--------|---|---|---|---|---|---|---|---|---|---|---|---|---|---|---|---|---|---|---|---|---|---|---|---|---|---|---|---|---|---|---|---|---|---|---|---|---|---|---|---|---|---|---|---|---|---|---|---|---|---|---|---|---|---|---|---|---|---|---|---|---|---|---|---|---|---|---|---|---|---|---|----|----|---|---|---|----|
| Mus    | G | A | A | T | A | A | C | A | G | G | A | A | T | C | G | A | C | C | A | A | A | T | C | T | G | A | A | T | G | T | C | T | T | C | T | C | A | C | C | A | C | G | G | C | T | A | T | G | T | T | G | T | A | G | G | A | G | G | C | T | G | T | G | T | G | G | C | T | T | C | A | T  | T  | T | T | C | 80 |
| Rattus | G | A | T | A | A | C | A | G | G | C | A | T | T | G | A | T | C | A | A | G | T | C | T | G | A | A | T | G | T | C | T | T | C | T | C | A | C | C | A | C | T | G | C | T | A | T | G | T | T | G | T | A | G | G | A | G | C | T | G | T | G | G | C | T | T | T | A | T | T | T | T | C  | 80 |   |   |   |    |
| Cavia  | G | G | A | T | A | A | C | A | G | G | A | A | T | C | G | A | T | C | A | A | G | T | C | T | T | G | A | A | T | G | T | C | T | T | C | T | C | A | C | A | C | T | G | C | T | A | T | G | T | T | G | T | A | G | G | C | T | G | T | G | G | C | T | T | T | A | T | C | C | T | G | 80 |    |   |   |   |    |
| Homo   | G | G | A | T | A | A | C | A | G | G | A | A | T | C | G | A | T | C | A | A | G | T | C | T | T | G | A | A | T | G | T | C | T | T | C | T | C | A | C | A | C | T | G | C | T | A | T | G | T | T | G | T | A | G | G | C | T | G | T | G | G | C | T | T | T | A | T | C | C | T | G | 80 |    |   |   |   |    |

  

|        |   |   |   |   |   |   |   |   |   |   |   |   |   |   |   |   |    |
|--------|---|---|---|---|---|---|---|---|---|---|---|---|---|---|---|---|----|
| Mus    | G | A | C | A | A | C | A | C | C | A | T | C | C | C | A | G | 96 |
| Rattus | G | A | C | A | A | C | A | C | C | A | T | C | C | C | A | G | 96 |
| Cavia  | G | A | C | A | A | C | A | C | C | A | T | C | C | C | A | G | 96 |
| Homo   | G | A | T | A | A | C | A | C | C | A | T | C | C | C | A | G | 96 |

ENSMUSG00000027340 exon 15 (ORF 2)

|        |   |   |   |   |   |   |   |   |   |   |   |   |   |   |   |   |   |   |   |   |   |   |   |   |   |   |   |   |   |   |   |   |   |   |   |   |   |   |   |   |   |   |   |   |   |   |   |   |   |   |   |   |   |   |   |   |   |   |   |   |   |   |   |   |   |   |   |   |   |   |   |    |    |   |    |   |   |   |    |
|--------|---|---|---|---|---|---|---|---|---|---|---|---|---|---|---|---|---|---|---|---|---|---|---|---|---|---|---|---|---|---|---|---|---|---|---|---|---|---|---|---|---|---|---|---|---|---|---|---|---|---|---|---|---|---|---|---|---|---|---|---|---|---|---|---|---|---|---|---|---|---|---|----|----|---|----|---|---|---|----|
| Mus    | G | T | A | C | C | C | A | G | A | G | A | A | A | G | A | G | A | A | T | C | A | A | G | A | A | T | G | G | A | A | G | A | G | G | T | G | T | G | A | G | C | A | A | A | G | A | A | G | C | A | A | G | A | A | G | C | A | A | G | T | C | T | C | T | G | A | C | G | G | C | A | T  | G  | S | A  | G | T | C | 80 |
| Rattus | G | T | A | C | C | C | A | G | A | G | A | A | A | G | A | G | A | A | T | C | A | A | G | A | A | T | G | G | A | A | G | A | G | G | T | G | T | G | A | G | C | A | A | A | G | A | A | G | C | A | A | G | A | A | G | T | C | T | C | T | G | A | C | G | G | C | A | T | G | S | A | G  | T  | C | 80 |   |   |   |    |
| Cavia  | G | T | A | C | C | C | A | G | A | G | A | A | A | G | A | G | A | A | T | C | A | A | G | A | A | T | G | G | A | A | G | A | G | G | T | G | T | G | A | G | C | A | A | A | G | C | A | A | G | A | A | G | T | C | T | C | T | G | A | C | G | G | C | A | T | G | S | A | G | T | C | 80 |    |   |    |   |   |   |    |
| Homo   | G | T | A | C | A | A | T | C | A | A | G | A | A | T | C | G | A | A | T | G | G | A | A | G | A | A | T | G | G | A | A | G | A | G | G | T | G | T | G | A | G | C | A | A | A | G | C | A | A | G | A | A | G | T | C | T | C | T | G | A | C | G | G | C | A | T | G | S | A | G | T | C  | 80 |   |    |   |   |   |    |

  

|        |   |   |   |   |   |   |   |   |   |   |   |   |   |   |   |   |   |   |   |   |   |   |   |   |   |   |   |   |   |   |   |   |   |   |   |   |   |   |   |   |   |   |   |   |   |   |   |   |   |   |   |   |   |   |   |   |   |   |   |   |   |   |   |   |   |   |   |     |     |     |
|--------|---|---|---|---|---|---|---|---|---|---|---|---|---|---|---|---|---|---|---|---|---|---|---|---|---|---|---|---|---|---|---|---|---|---|---|---|---|---|---|---|---|---|---|---|---|---|---|---|---|---|---|---|---|---|---|---|---|---|---|---|---|---|---|---|---|---|---|-----|-----|-----|
| Mus    | T | A | C | A | A | T | C | T | G | C | C | A | T | T | G | G | C | A | T | T | A | A | A | A | A | A | T | A | C | A | G | A | T | G | C | T | T | C | A | G | T | A | C | C | T | G | C | C | C | A | T | C | A | G | C | C | C | C | A | C | C | T | T | T | G | C | A | G   | G   | 160 |
| Rattus | T | A | T | A | A | T | T | G | C | C | A | T | T | T | G | G | C | A | T | T | A | A | A | A | A | A | T | A | C | A | G | A | T | G | C | T | T | C | A | G | T | A | C | C | T | G | C | C | C | A | T | C | A | G | C | C | C | A | A | C | T | T | T | G | C | A | G | G   | 160 |     |
| Cavia  | T | A | C | A | A | T | T | G | C | C | A | T | T | T | G | G | C | A | T | T | A | A | A | A | A | T | A | C | A | G | A | T | G | C | T | T | C | A | G | T | A | C | C | T | G | C | C | C | A | T | C | A | G | C | C | C | A | A | C | T | T | T | G | C | A | G | G | 160 |     |     |
| Homo   | T | A | C | A | A | T | T | G | C | C | A | T | T | T | G | G | C | A | T | T | A | A | A | A | A | T | A | C | A | G | A | T | G | C | T | T | C | A | G | T | A | C | C | T | G | C | C | C | A | T | C | A | G | C | C | C | A | A | C | T | T | T | G | C | A | G | G | 160 |     |     |

ENSMUSG00000027340\_intron\_14

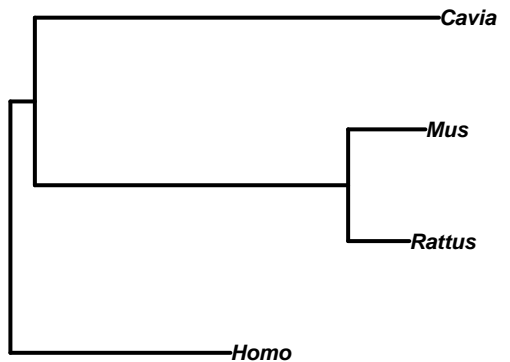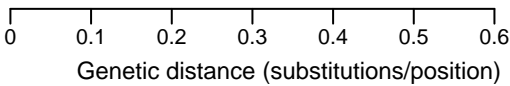





ENSMUSG00000030653 intron 27

Description: cGMP-dependent 3',5'-cyclic phosphodiesterase (Pde2a)  
 Intron number: 27  
 Mouse chromosome: 7  
 Upstream exon length: 100  
 Downstream exon length: 113  
 Mouse intron length: 271  
 Intron alignment length: 299  
 Total murinae branch length: 0.15961  
 K\_score: 0.08321  
 Scaling factor: 0.67428

ENSMUSG00000030653 exon 27 (ORF 0)

|        |                       |                                                            |     |    |
|--------|-----------------------|------------------------------------------------------------|-----|----|
| Mus    | GACTATCAGCGCATGCTGGA  | CCTGATGAGGGACATCATCTTGGCTACAGACCTGGGCACACCACCTCCGCATCTTCAA | GGG | 80 |
| Rattus | GACTATCAGCGCAATGCTGGA | CCTGATGAGGGACATCATCTTGGCCACGGACCTGGGCACACCACCTCCGCATCTTCAA | GGG | 80 |
| Cavia  | GACTATCAGCGCATGCTGGA  | CCTGATGAGGGACATCATCTTGGCCACAGACCTGGGCACACCACCTCCGCATCTTCAA | GGG | 80 |
| Homo   | GACTATCAGCGCATGCTGGA  | CCTGATGAGGGACATCATCTTGGCCACAGACCTGGGCACACCACCTCCGCATCTTCAA | GGG | 80 |

  

|        |                       |     |
|--------|-----------------------|-----|
| Mus    | CCTGCAGAAAGATGGCTGAAG | 100 |
| Rattus | CCTGCAGAAAGATGGCTGAAG | 100 |
| Cavia  | CCTGCAGAAAGATGGCTGAAG | 100 |
| Homo   | CCTGCAGAAAGATGGCTGAAG | 100 |

ENSMUSG00000030653 exon 28 (ORF 2)

|        |                                            |                                     |    |
|--------|--------------------------------------------|-------------------------------------|----|
| Mus    | TGGTTATGACCGAAACAACAGCAACACCACAGGCTTCTTCTG | TGCCTCCTCATGACCTCCTGTGACCTCTCTGACCA | 80 |
| Rattus | TGGTTATGACCGAAACAACAGCAACACCACAGGCTTCTTCTA | TGCCTCCTCATGACCTCCTGTGACCTCTCTGACCA | 80 |
| Cavia  | TGGGCTATGACCGAAACAACAGCAACACCACAGACTTCTTCT | TGCCTCCTCATGACCTCCTGTGACCTCTCTGACCA | 80 |
| Homo   | TGGGCTATGACCGAAACAACAGCAACACCACAGACTTCTTCT | TGCCTCCTCATGACCTCCTGTGACCTCTCTGACCA | 80 |

  

|        |                                  |     |
|--------|----------------------------------|-----|
| Mus    | ACAAAGGGCTGSAAGACCACAGAAAGATTGCA | 113 |
| Rattus | ACAAAGGGCTGSAAGACCACAGAAAGATTGCG | 113 |
| Cavia  | ACAAAGGGCTGSAAGACCACAGAAAGATTGCT | 113 |
| Homo   | ACAAAGGGCTGSAAGACTAGAGAAAGATTGCG | 113 |

ENSMUSG00000030653\_intron\_27

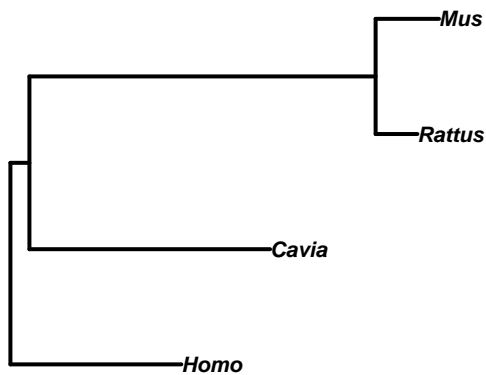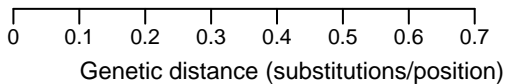

|        |                                                                                                                                                                                                                           |     |
|--------|---------------------------------------------------------------------------------------------------------------------------------------------------------------------------------------------------------------------------|-----|
| Mus    | G T G . . . . . C G C A . C A C A T T G C T G G G A G A G A T G G T T G G T T A A C A T G G A G A C T G C C C A C C T G A C A C T C G A G T G G C T T G C C T G C C T . . . . .                                           | 93  |
| Rattus | G T G . . . . . C C A C A G C T C A G T G C T G G G A G G G A T G G G . . . . . T G G T T A G C A T G G A G A T C T G A A C A T C T G G A C A T G T G G A T G C T T C T G C C T G C C T . . . . .                         | 88  |
| Cavia  | G T G C G C A C C C T T A G C C C A G C . C T T C T G G T T G A G A G G A T G G . . . . . T G T T C A G A T C T G C C G . G G T G C A T A C T C T G A C T T G A G . . . . .                                               | 81  |
| Homo   | G T G A G T G C T T A G C C C A G T C . C T T G G G G T G G G A G G A C A A . . . . . C C A G G G A A G S A T T T G G A G . G S A G C A T T C C A G G T G C A G A C C A T C C C C T G C A . . . . .                       | 88  |
| Mus    | . . . . . G C C C A T T C C T G C C T A T G . G T G C C C T G C A G G C A G A C C T A C T A C T G G T C A G C T . . . . . T C C A T T G G G T G T G C T T T G T T C C C A T G G G A T G C T G T A G A C C C A C T T T G C | 193 |
| Rattus | . . . . . A G C C C T T T C C T G G C T A T G . G T G C C C T G C A G G C A G A C C T A C T A C T G G C A T C T . . . . . T C C A T T G C A T G . . . . . G T T C C C A T G G G A T G C T G T A G A C C T A C T T C A G   | 183 |
| Cavia  | . . . . . A T T C C T T C C T T C C A G T A T C A G C C C T C C A G G C A G A C A G C A T C A G C C C T G S A . . . . . C C T A A C A G A G T G T C C A G T C C C . . . . . T G G C A A C T . . . . .                     | 168 |
| Homo   | A C A T C A A C C C T T C T C T G C C T C A C G C C C C C C C A G G C A G A C C C A G C A C T G G C C C T T G C T C C A T C A A G G T G C C C A T T C C C . . . . . T G A C C G C T C T G C                               | 196 |
| Mus    | G A G A G C C T G T G G G T C C T G T T C T C A G A A G G A C A A G G C A C C T G G G C C C T C C T G C T T G A C T C C A T T G T C C C C C . A A C A G                                                                   | 271 |
| Rattus | G A C G G C T G G G G C C C T T G T T C T C A G A A G G A C A A G G A A C C T G G G C C C T C C T G C T T G A C T C C G T T G T C C C C C . A A C A G                                                                     | 261 |
| Cavia  | . . . . . A G G C C T T G T C T C A G A G G G A . A A G G A G G C T G G G C C C T C T C C T T G A C C C A T C A T T C C G C A A C A G                                                                                     | 234 |
| Homo   | G T T G G G C C C T G G G A G C C T T G T C T C A G A A G G G C . A A A G A G G C T G G G C C C G G T C C T T G A C C C A T C C T C C C C T C A A C A G                                                                   | 274 |

ENSMUSG00000034575 intron 1

Description: DNA polymerase sigma (Papd7)

Intron number: 1

Mouse chromosome: 13

Upstream exon length: 90

Downstream exon length: 47

Mouse intron length: 768

Intron alignment length: 1223

Total murinae branch length: 0.16595

K\_score: 0.05011

Scaling factor: 0.67578

ENSMUSG00000034575 exon 1 (ORF 0)

|        |       |       |     |      |     |     |      |      |      |     |      |     |     |     |     |      |     |    |     |     |    |    |    |    |    |    |    |
|--------|-------|-------|-----|------|-----|-----|------|------|------|-----|------|-----|-----|-----|-----|------|-----|----|-----|-----|----|----|----|----|----|----|----|
| Mus    | ATGTC | CCCTT | GTG | CCTG | AAG | AAG | GCAG | CCAT | GAGA | AGG | AGGT | GGT | GAA | ACG | GAT | CGAA | ACT | GT | GGT | GAA | AG | AC | CT | CT | GG | CC | 80 |
| Rattus | ATGTC | CCCTT | GTG | CCTG | AAG | AAG | GCAG | CCAT | GAGA | AGG | AGGT | GGT | GAA | ACG | GAT | CGAA | ACT | GT | GGT | GAA | AG | AC | CT | CT | GG | CC | 80 |
| Cavia  | ATGTC | CCCTT | GTG | CCTG | AAG | AAG | GCAG | CCAT | GAGA | AGG | AGGT | GGT | GAA | ACG | GAT | CGAA | ACT | GT | GGT | GAA | AG | AC | CT | CT | GG | CC | 80 |
| Homo   | ATGTC | CCCTT | GTG | CCTG | AAG | AAG | GCAG | CCAT | GAGA | AGG | AGGT | GGT | GAA | ACG | GAT | CGAA | ACT | GT | GGT | GAA | AG | AC | CT | CT | GG | CC | 80 |

  

|        |     |      |     |    |
|--------|-----|------|-----|----|
| Mus    | GAC | AGCT | GAT | 90 |
| Rattus | GTC | GGCT | GAC | 90 |
| Cavia  | TAC | GGCT | GAC | 90 |
| Homo   | GAC | GGCT | GAT | 90 |

ENSMUSG00000034575 exon 2 (ORF 0)

|        |      |      |      |     |       |     |     |     |      |       |     |      |    |
|--------|------|------|------|-----|-------|-----|-----|-----|------|-------|-----|------|----|
| Mus    | GTGC | AGAT | ATTT | GGC | AGCTT | TAG | TAC | AGG | CTCT | ATCTT | CCA | CAAG | 47 |
| Rattus | GTGC | AGAT | ATTT | GGC | AGCTT | TAG | TAC | AGG | CTCT | ATCTT | CCA | CAAG | 47 |
| Cavia  | GTGC | AGAT | ATTT | GGC | AGCTT | TAG | TAC | AGG | CTCT | ATCTT | CCA | CAAG | 47 |
| Homo   | GTGC | AGAT | ATTT | GGC | AGCTT | TAG | TAC | AGG | CTCT | ATCTT | CCA | CAAG | 47 |

ENSMUSG00000034575\_intron\_1

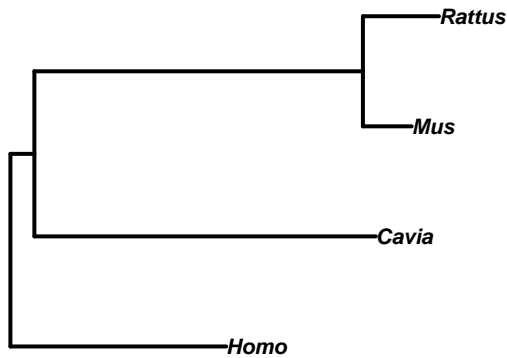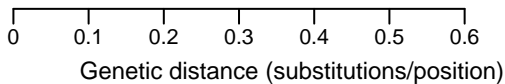



ENSMUSG00000051768 intron 14

Description: DNA repair protein XRCC1 (Xrcc1)

Intron number: 14

Mouse chromosome: 7

Upstream exon length: 137

Downstream exon length: 91

Mouse intron length: 1057

Intron alignment length: 2202

Total murinae branch length: 0.17517

K\_score: 0.06743

Scaling factor: 0.67933

ENSMUSG00000051768 exon 14 (ORF 1)

|        |                                                                                    |    |
|--------|------------------------------------------------------------------------------------|----|
| Mus    | GGTGGCCAAACAGAGGGAAACAAAGGCAGCCCCAGCCCCAGAGGAGAATGGCGAGGAGCCCGTATGCAGGCTCCACAGATG  | 80 |
| Rattus | GGTGGCCAAAGCAGAGGGAAACAAAGGCAGCCCCAGCCCCAGAGGAGAATGGCGAGGAGCCCGTATGCAGGCTCCACAGATG | 80 |
| Cavia  | GGTGGCCGAGCAGAGGGAAACAAAGGCAGCCCCAGCCCCAGAGGAGAATGGCTGAGGAGCCCGTATGCAGGCTCCACAGATG | 77 |
| Homo   | GGTGGCAAGAGCAGAGGGAAACAAAGGCAGCCCCAGCCCCAGAGGAGAATGGTGAAGAGCCCGTATGCAGGCTCCACAGATG | 80 |

  

|        |                                                             |     |                           |     |
|--------|-------------------------------------------------------------|-----|---------------------------|-----|
| Mus    | AGAACACAGACAGTGAACCCCTCAGAGGCT                              | - - | GACCTGCCAATCCCAGAGCTCCCAG | 137 |
| Rattus | AGAACACAGACAGCAGAGGCTCCCTCAGAGGCT                           | - - | GACCTGCCAATCCCAGAGCTCCCAG | 137 |
| Cavia  | AGAACACAGACAAACAGGATCGCCAGAGTCTCCGACCAAGCCAATCCCTGAGCTCCCAG |     |                           | 137 |
| Homo   | AGAACACGGACAGTGAAGAACACAGGAGCTCCTGATCTGCCAGTCCCTGAGCTCCCAG  |     |                           | 140 |

ENSMUSG00000051768 exon 15 (ORF 2)

|        |                                                                                 |    |
|--------|---------------------------------------------------------------------------------|----|
| Mus    | ACTTCTTCAGGGCAAACACTTCTTCTGTATGGCGAGTTCCTGGGGATGAGAGGAGGAGGCTCATCCGCTACGTGAC    | 80 |
| Rattus | ACTTCTTCCAGGGCAAAGCACTTCTTCTGTATGGCGAGTTCCTGGGGATGAGAGGAGGAGGCTCATCCGATATGTGACA | 80 |
| Cavia  | ACTTCTTCCAGGGCAAAGCACTTCTTCTGTATGGCGAGTTCCTGGTGAAGGAGGAGGCTCATCCGTTATGTGACA     | 80 |
| Homo   | ATTTCTTCCAGGGCAAAGCACTTCTTCTTACGGCGAGTTCCTGGGACGAGCGGCGGAAACTCATCCGATACGTCACA   | 80 |

  

|        |              |    |
|--------|--------------|----|
| Mus    | GCTTTC AATGG | 91 |
| Rattus | GCTTTC AATGG | 91 |
| Cavia  | GCTTTC AATGG | 91 |
| Homo   | GCTTTC AATGG | 91 |

ENSMUSG00000051768\_intron\_14

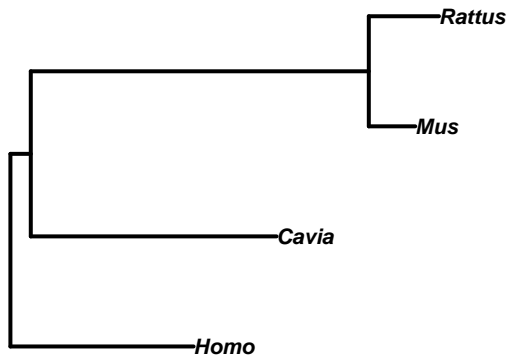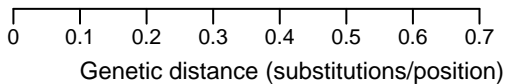

Mus Rattus Cavia Homo  
GT TAGACAATCCC ..... T GACTCTGTGACATGTCCCTAGGTCCCTGGGCTCTGTCT ..... 55  
GTTGGGATCCCT ..... GACTGTGACATGTCCCTCAACCCCTGGGCTCTGTCT ..... 52  
GATGGAAATCCCGCCATCCCTCOTGAAGTGGCATTTCCTGCTGAGTCTGAGTGTGACATGTCCCTGGGCTCTGTCT ..... 66  
GATGGAAATCCCGCCATCCCTCOTGAAGTGGCATTTCCTGCTGAGTCTGAGTGTGACATGTCCCTGGGCTCTGTCT ..... 110

Mus Rattus Cavia Homo  
..... GTATGCAACACTTGGTGGCTTTCCCTGTGACTCCACTTTAACCCCTCTGACAACCTTTGGTGTCTCTCT ..... 111  
..... GTATGCAACACTTGGTGGCTTTCCCTGTGACTCCACTTTAACCCCTCTGACAACCTTTGGTGTCTCTCTCT ..... 122  
..... GTATGCAACACTTGGTGGCTTTCCCTGTGACTCCACTTTAACCCCTCTGACAACCTTTGGTGTCTCTCTCT ..... 160  
..... GTATGCAACACTTGGTGGCTTTCCCTGTGACTCCACTTTAACCCCTCTGACAACCTTTGGTGTCTCTCTCT ..... 219

Mus Rattus Cavia Homo  
TCTGGCTCTGGCAAGACCTTGTGTGACCTTGTCTGTGACCTTCT ..... CCAGTGTGAGCAACCTC ..... ATTTCTGTGACTTTCAGGACTTACCC ..... 202  
TCTGGCTCTGGCAAGACCTTGTGTGACCTTGTCTGTGACCTTCT ..... CCAGTGTGAGCAACCTC ..... ATTTCTGTGACTTTCAGGACTTACCC ..... 215  
TCTGGCTCTGGCAAGACCTTGTGTGACCTTGTCTGTGACCTTCT ..... CCAGTGTGAGCAACCTC ..... ATTTCTGTGACTTTCAGGACTTACCC ..... 236  
TCTGGCTCTGGCAAGACCTTGTGTGACCTTGTCTGTGACCTTCT ..... CCAGTGTGAGCAACCTC ..... ATTTCTGTGACTTTCAGGACTTACCC ..... 324

Mus Rattus Cavia Homo  
ATCTCGCCCTAAACGCAGCTTCTGCTGCTGATCAGGCTCCCTGGACACCTGAGTGTGGGCACA ..... GTGTGTTTGCAT ..... C286  
ATCTCGCCCTAAACGCAGCTTCTGCTGCTGATCAGGCTCCCTGGACACCTGAGTGTGGGCACA ..... GTGTGTTTGCAT ..... C298  
ATCTCGCCCTAAACGCAGCTTCTGCTGCTGATCAGGCTCCCTGGACACCTGAGTGTGGGCACA ..... GTGTGTTTGCAT ..... C432

Mus Rattus Cavia Homo  
ATTACTGATAACCTTAAACCAAGCTGTGTGACCTTGTCTGTGACCTTCT ..... CCAGTGTGAGCAACCTC ..... ATTTCTGTGACTTTCAGGACTTACCC ..... 386  
ATTACTGATAACCTTAAACCAAGCTGTGTGACCTTGTCTGTGACCTTCT ..... CCAGTGTGAGCAACCTC ..... ATTTCTGTGACTTTCAGGACTTACCC ..... 372  
ATTACTGATAACCTTAAACCAAGCTGTGTGACCTTGTCTGTGACCTTCT ..... CCAGTGTGAGCAACCTC ..... ATTTCTGTGACTTTCAGGACTTACCC ..... 358  
ATTACTGATAACCTTAAACCAAGCTGTGTGACCTTGTCTGTGACCTTCT ..... CCAGTGTGAGCAACCTC ..... ATTTCTGTGACTTTCAGGACTTACCC ..... 516

Mus Rattus Cavia Homo  
TAGCTCTTTTTTTTTTTTTTAAAGACTTATTCAATTTATATATATAAGTACACTGTCACTGTCTTCAGACACACCAGAGGGCATCAGATCTCTTTACAGATGTTGT ..... 392  
TAGCTCTTTTTTTTTTTTTTAAAGACTTATTCAATTTATATATATAAGTACACTGTCACTGTCTTCAGACACACCAGAGGGCATCAGATCTCTTTACAGATGTTGT ..... 482  
TAGCTCTTTTTTTTTTTTTTAAAGACTTATTCAATTTATATATATAAGTACACTGTCACTGTCTTCAGACACACCAGAGGGCATCAGATCTCTTTACAGATGTTGT ..... 364  
TAGCTCTTTTTTTTTTTTTTAAAGACTTATTCAATTTATATATATAAGTACACTGTCACTGTCTTCAGACACACCAGAGGGCATCAGATCTCTTTACAGATGTTGT ..... 522

Mus Rattus Cavia Homo  
AGCCACCATGTGGTGGTGGGAATTGAAGTCAATGACCTCTGAAAGAGCAGTGGGGTGTCTTAACCACTGAGCCATCTCTCCAGCCCGGCCAGGCTGAAACCTGTAGCTTT ..... 407  
AGCCACCATGTGGTGGTGGGAATTGAAGTCAATGACCTCTGAAAGAGCAGTGGGGTGTCTTAACCACTGAGCCATCTCTCCAGCCCGGCCAGGCTGAAACCTGTAGCTTT ..... 592  
AGCCACCATGTGGTGGTGGGAATTGAAGTCAATGACCTCTGAAAGAGCAGTGGGGTGTCTTAACCACTGAGCCATCTCTCCAGCCCGGCCAGGCTGAAACCTGTAGCTTT ..... 364  
AGCCACCATGTGGTGGTGGGAATTGAAGTCAATGACCTCTGAAAGAGCAGTGGGGTGTCTTAACCACTGAGCCATCTCTCCAGCCCGGCCAGGCTGAAACCTGTAGCTTT ..... 522

Mus Rattus Cavia Homo  
CAATCTGCCTCAGCCCTCCAGGTTCTTAGATACACCTGTGCTGCTGAGTGTGGTCTTCCCTATAAACCAGTACTTGGGATGTCAAGGGCAGAAAGATCACAAGTTCAAAGCCAGCCAGCTAC ..... 598  
CAATCTGCCTCAGCCCTCCAGGTTCTTAGATACACCTGTGCTGCTGAGTGTGGTCTTCCCTATAAACCAGTACTTGGGATGTCAAGGGCAGAAAGATCACAAGTTCAAAGCCAGCCAGCTAC ..... 812  
CAATCTGCCTCAGCCCTCCAGGTTCTTAGATACACCTGTGCTGCTGAGTGTGGTCTTCCCTATAAACCAGTACTTGGGATGTCAAGGGCAGAAAGATCACAAGTTCAAAGCCAGCCAGCTAC ..... 393  
CAATCTGCCTCAGCCCTCCAGGTTCTTAGATACACCTGTGCTGCTGAGTGTGGTCTTCCCTATAAACCAGTACTTGGGATGTCAAGGGCAGAAAGATCACAAGTTCAAAGCCAGCCAGCTAC ..... 565

Mus Rattus Cavia Homo  
TAGTAAACCTTTTTTAAATAAAGAAATGGAGAGTGGAGAGTGCAGGGCAGAAAAGACAGTCAACACCAAGTGGGATGTCAAGGGCAGAAAGATCACAAGTTCAAAGCCAGCCAGCTAC ..... 703  
TAGTAAACCTTTTTTAAATAAAGAAATGGAGAGTGGAGAGTGCAGGGCAGAAAAGACAGTCAACACCAAGTGGGATGTCAAGGGCAGAAAGATCACAAGTTCAAAGCCAGCCAGCTAC ..... 919  
TAGTAAACCTTTTTTAAATAAAGAAATGGAGAGTGGAGAGTGCAGGGCAGAAAAGACAGTCAACACCAAGTGGGATGTCAAGGGCAGAAAGATCACAAGTTCAAAGCCAGCCAGCTAC ..... 452  
TAGTAAACCTTTTTTAAATAAAGAAATGGAGAGTGGAGAGTGCAGGGCAGAAAAGACAGTCAACACCAAGTGGGATGTCAAGGGCAGAAAGATCACAAGTTCAAAGCCAGCCAGCTAC ..... 647

Mus Rattus Cavia Homo  
..... GCTTGTGGGCAATGTGAGGAGAGTATGTGAAACCCCAAT ..... GAGGGGAGTGAAT ..... CCTTGGACATGTGTGGAAATAAGAAAGAA ..... AAC789  
..... GCTTGTGGGCAATGTGAGGAGAGTATGTGAAACCCCAAT ..... GAGGGGAGTGAAT ..... CCTTGGACATGTGTGGAAATAAGAAAGAA ..... AAC1009  
..... GCTTGTGGGCAATGTGAGGAGAGTATGTGAAACCCCAAT ..... GAGGGGAGTGAAT ..... CCTTGGACATGTGTGGAAATAAGAAAGAA ..... AAC530  
..... GCTTGTGGGCAATGTGAGGAGAGTATGTGAAACCCCAAT ..... GAGGGGAGTGAAT ..... CCTTGGACATGTGTGGAAATAAGAAAGAA ..... AAC757

Mus Rattus Cavia Homo  
TAGCTCAGAGGCAGTGTGGGA ..... GCACCTGAGGGGAAGTGTGGGCA ..... 836  
TAGCTCAGAGGCAGTGTGGGA ..... GCACCTGAGGGGAAGTGTGGGCA ..... 1056  
TAGCTCAGAGGCAGTGTGGGA ..... GCACCTGAGGGGAAGTGTGGGCA ..... 596  
TAGCTCAGAGGCAGTGTGGGA ..... GCACCTGAGGGGAAGTGTGGGCA ..... 867

Mus Rattus Cavia Homo  
..... CCACAGCCCTGCCTGGGCA ..... 846  
..... CCACAGCCCTGCCTGGGCA ..... 1076  
..... CCACAGCCCTGCCTGGGCA ..... 611  
..... CCACAGCCCTGCCTGGGCA ..... 977

Mus Rattus Cavia Homo  
GCAGGCCAGGCCTGGTGGCTCAOCCCGTACTTTGAGAGGCCGAGGTGGGAGACTGCTTGAGTCCAAGAGTGAAGCCAGCCCTGGGCAACATAGTGAAGCCOCCOCCGA ..... 977

Mus Rattus Cavia Homo  
..... 846  
..... 1076  
..... 611  
..... 1087

Mus Rattus Cavia Homo  
..... 846  
..... 1076  
..... 611  
..... 1197

Mus Rattus Cavia Homo  
..... 846  
..... 1076  
..... 611  
..... 1307

Mus Rattus Cvia Homo  
..... 903  
..... 1130  
..... 703  
..... 1413

Mus Rattus Cavia Homo  
..... 938  
..... 1240  
..... 735  
..... 1456

Mus Rattus Cavia Homo  
TTGGCTTCTAGGTAAAGGCTCTACCACTGAGCTAAATCCCCAGCCCTAGATGAGAAATTTAGTCAAGGCCCC ..... CCTCCTGAGCACTTATAC ..... 972  
TTGGCTTCTAGGTAAAGGCTCTACCACTGAGCTAAATCCCCAGCCCTAGATGAGAAATTTAGTCAAGGCCCC ..... CCTCCTGAGCACTTATAC ..... 1337  
TTGGCTTCTAGGTAAAGGCTCTACCACTGAGCTAAATCCCCAGCCCTAGATGAGAAATTTAGTCAAGGCCCC ..... CCTCCTGAGCACTTATAC ..... 780  
TTGGCTTCTAGGTAAAGGCTCTACCACTGAGCTAAATCCCCAGCCCTAGATGAGAAATTTAGTCAAGGCCCC ..... CCTCCTGAGCACTTATAC ..... 1499

Mus Rattus Cavia Homo  
TTGGTGGCTCTGGCTCCTGGCTCCTCTGTCTTCTGAGTACTCAGGAGCTGGTCAAGT ..... CCTCAL ..... CTTTTCCTCTCTCTCCG ..... 1055  
TTGGTGGCTCTGGCTCCTGGCTCCTCTGTCTTCTGAGTACTCAGGAGCTGGTCAAGT ..... CCTCAL ..... CTTTTCCTCTCTCTCCG ..... 1426  
TTGGTGGCTCTGGCTCCTGGCTCCTCTGTCTTCTGAGTACTCAGGAGCTGGTCAAGT ..... CCTCAL ..... CTTTTCCTCTCTCTCCG ..... 867  
TTGGTGGCTCTGGCTCCTGGCTCCTCTGTCTTCTGAGTACTCAGGAGCTGGTCAAGT ..... CCTCAL ..... CTTTTCCTCTCTCTCCG ..... 1581

Mus Rattus Cavia Homo  
AC 1057  
AC 1428  
AC 869  
AC 1583

ENSMUSG00000036244 intron 7

Description: TBC1 domain family, member 21 (Tbc1d21)

Intron number: 7

Mouse chromosome: 9

Upstream exon length: 97

Downstream exon length: 101

Mouse intron length: 252

Intron alignment length: 347

Total murinae branch length: 0.17005

K\_score: 0.05567

Scaling factor: 0.67976

ENSMUSG00000036244 exon 7 (ORF 0)

|        |                                                                                          |    |
|--------|------------------------------------------------------------------------------------------|----|
| Mus    | GAGCACAGCTGTGTGCATCAACATCGGTTGTAGGCCAAGAATCTGGACATGGCTCAACAAGCCTGATCACTCTACTGGAAACCCCTGA | 80 |
| Rattus | GAGCACAGCTGTGTGCATCAACATCGGTTGTAGGCCAAGAATCTGGACATGGCTCAACAAGCCTGATCACTCTACTGGAAACCCCTGA | 80 |
| Cavia  | GAGCACAGCTGTGTGCATCAACATCGGTTGTAGGCCAAGAATCTGGACATGGCTCAACAAGCCTGATCACTCTACTGGAAACCCCTGA | 80 |
| Homo   | GAGCACAGCTGTGTGCATCAACATCGGTTGTAGGCCAAGAATCTGGACATGGCTCAACAAGCCTGATCACTCTACTGGAAACCCCTGA | 80 |

  

|        |                    |    |
|--------|--------------------|----|
| Mus    | ATTTGCTGAAACACCTCA | 97 |
| Rattus | GTTTGCTGACACCTCA   | 97 |
| Cavia  | ATTTGCTGAGCACCTGA  | 97 |
| Homo   | GTTTGCTGAGCACCTAA  | 97 |

ENSMUSG00000036244 exon 8 (ORF 2)

|        |                                                                                      |    |
|--------|--------------------------------------------------------------------------------------|----|
| Mus    | AAGGGAAGGGCTCAGGGGCTGTGCACTCCCTCTTCCCGTGGTTCTGGCCCTTTGCTTCCAGCGTGCCTTCAAACACCTTCCGAT | 80 |
| Rattus | AAGGGAAGGGCTCAGGGGCTGTGCACTCCCTCTTCCCGTGGTTCTGGCCCTTTGCTTCCAGCGTGCCTTCAAACACCTTCCGAT | 80 |
| Cavia  | AAGGGAAGGGCTCAGGGGCTGTGCACTCCCTCTTCCCGTGGTTCTGGCCCTTTGCTTCCAGCGTGCCTTCAAACACCTTCCGAT | 80 |
| Homo   | AAGGGAAGGGCTCAGGGGCTGTGCACTCCCTCTTCCCGTGGTTCTGGCCCTTTGCTTCCAGCGTGCCTTCAAACACCTTCCGAT | 80 |

  

|        |                       |     |
|--------|-----------------------|-----|
| Mus    | GATGTCTGGAGGCTCTGGGAG | 101 |
| Rattus | GATGTCTGGAGGCTCTGGGAG | 101 |
| Cavia  | GATGTCTGGAGGCTCTGGGAG | 101 |
| Homo   | GATGTCTGGAGGCTCTGGGAG | 101 |

ENSMUSG00000036244\_intron\_7

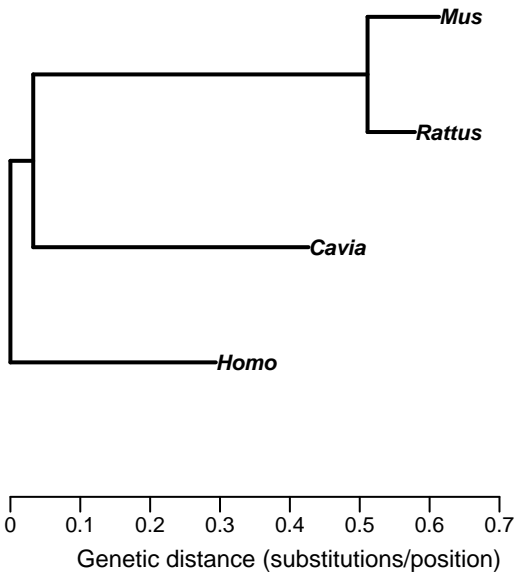





ENSMUSG00000028173 intron 7

Description: Integral membrane protein GPR177 Precursor (Wls)

Intron number: 7

Mouse chromosome: 3

Upstream exon length: 98

Downstream exon length: 64

Mouse intron length: 364

Intron alignment length: 475

Total murinae branch length: 0.12969

K\_score: 0.087

Scaling factor: 0.68014

ENSMUSG00000028173 exon 7 (ORF 0)

|        |                                                                                      |    |
|--------|--------------------------------------------------------------------------------------|----|
| Mus    | GATCAACATGAAACCGGAATCACATTGCAGGGTATCTGGAAGCAAGTTGGACCAATTGCTGTTGGCTCCTTCTGGCCTCTTCAT | 80 |
| Rattus | GATCAACATGAGCGGAATCACATTGCAGGGTATTGGAAGCAAGTTGGACCAATTGCTGTTGGCTCCTTCTGGCCTCTTCAT    | 80 |
| Cavia  | GATCAGCATCAGCGGAACCCACATCGCGGGTATCTGGAAGCAAGTTGGACCAATTGCTGTTGGCTCCTTCTGGCCTCTTCAT   | 80 |
| Homo   | GATCAGCATCAGCGGAACCCACATCGCGGGTATCTGGAAGCAAGTTGGACCAATTGCTGTTGGCTCCTTCTGGCCTCTTCAT   | 80 |

  

|        |                    |    |
|--------|--------------------|----|
| Mus    | ATTTGACATGTGTGAAAG | 98 |
| Rattus | ATTTGACATGTGTGAGAG | 98 |
| Cavia  | ATTTGACATGTGTGAGAG | 98 |
| Homo   | ATTTGACATGTGTGAGAG | 98 |

ENSMUSG00000028173 exon 8 (ORF 1)

|        |                                                                    |    |
|--------|--------------------------------------------------------------------|----|
| Mus    | AGGAGTACAACACTCACAAATCCTTTCTACAGTATCTGGACTACAGATGTTGGAACAGAACTGGCT | 64 |
| Rattus | AGGAGTACAACACTCACAAATCCTTTCTACAGTATCTGGACTACAGATGTTGGAACAGAACTGGCT | 64 |
| Cavia  | AGGCGTGCAGCTCACCAACCTTTCTACAGTATCTGGACTACAGATGTTGGAACAGAACTGGCT    | 64 |
| Homo   | AGGCGTACAACACTCACAAATCCTTTCTACAGTATCTGGACTACAGATGTTGGAACAGAACTGGCT | 64 |

ENSMUSG00000028173\_intron\_7

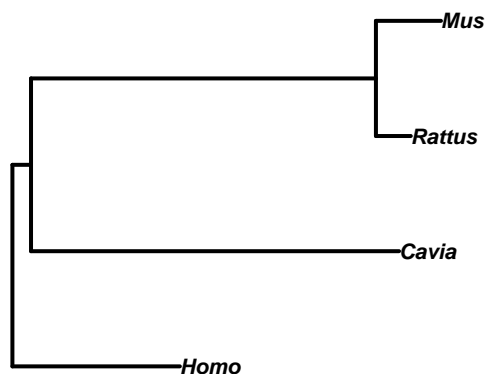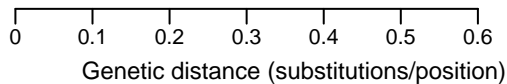

Mus  
Rattus  
Cavia  
Homo

```

GTGAGCAGATATCAGCATCACTCCAGGATGAAATGTACCTTTCTATGCTACTTCTAICTTTCTAGGAAGAATTTTGAATGAAGCATGGTGGTGGGATTCATGGGA109
GTGAGCAGGTACCGGAGTCAATCCAGGATGAAATGTGCTTTCTATGCTACTTCTAICTTTCTAGGAAGAATTTTGAATGAAGCATGGTGGTGGGATTCATGGGA109
GTGAGCAGGTGCGCGAGCTGCTCCAGGATGAAATGTGCTTTCTATGCTACTTCTAICTTTCTAGGAAGAATTTTGAATGAAGCATGGTGGTGGGATTCATGGGA94
GTGAGCAGGTGCTTTCTGCGAGAGTGAAGCCAAAGCTGTGCATCAGCTGCGCGAGCTGCTTTCTAGGAAGAATTTTGAATGAAGCATGGTGGTGGGATTCATGGGA110

```

Mus  
Rattus  
Cavia  
Homo

```

TGGAAATATTGGAGAGTCAATATCCAGATGACATATGGGACTAAGTCAAAGGTTTAGTCCCTTTAT-----176
TGGAAATATTGGAGAGTCAATATCCAGATGACATATGGGACTAAGTCAAAGGTTTAGTCCCTTTAT-----175
TGAAGTCACTGGGTGGTGGTCACTTCCAGGACTGGGCTGAGTCAAAGCTTTGGGCTTTATTTGTTTTTTTCCAGCACTGGGATCAACCCAGGTCCTGTTGC203
TGGAAAGCACTGGACGTGGTCACTTCCAGGACTGGGCTGAGTCAAAGCTTTGGGCTTTATTTGTTTTTTTCCAGCACTGGGATCAACCCAGGTCCTGTTGC178

```

Mus  
Rattus  
Cavia  
Homo

```

-----ATATGCAAAGTGGTTG-----CCATATTTCAAAGCTTCCATCTCTTA-----TACTCTCTGAAATTTATTTTCTAAATAT248
-----ACATGCAAAGTGGTTG-----CCATATTTCAAAGCTTCCATCTCTTA-----TACTCTCTGAAATTTATTTTCTAAATAT252
AGCCCCAGGTCCATGCATAGCCCCCTTAGCTTGCAAAAGCTTTGGGCGATCAAGCTTCTCCAGCTTGTTCATCTGGATTGGTTCTCTGTGATGCTG-----CTGGTCAG310
-----AGTTGAAAAATATTTGGGCGATGTATTTCTACAGGCTTCACTCTTTA-----GGAATTTCTGTAAATGTTT-----TAGGCTA254

```

Mus  
Rattus  
Cavia  
Homo

```

AGTACACTCACACTCCCTCCATACCTCACTTCAATGTTGCAACACTAAGAGAGGCT-----CTGTTCTGCTTTGCTTA-----TCT335
AGTAAAGTCTACCCCTACCAATATCCCTGCTCACTCCACTGTTGCAATCTTAAGAGAGGCT-----CTGTTCCGCTTTGCTTA-----TCT337
GGAGAGCTTCTCTCCGCA-----GTTAGCATGAAAGGAAAGAGTCCAG-----CTGCTTCCCTTASAGGAATTACAGCCCTGCT393
AATACAGCCCTCACCCCTGCA-----GTTAGCATGAAAGGAAAGATCTGAAAAGGAAAGTTCCTTCCCTTGTATTAATTTGTGTTTCC341

```

Mus  
Rattus  
Cavia  
Homo

```

CTTCATCTTG-----TTTGTCTTTTATATAG364
CTTCATCTTG-----TTTGTCTTTTATATAG366
TTGCTCTTGGTTCTTTCCCTTTTTTCTGTAG428
TTGCTATCTA-----TTTTCTTTGTAG363

```

ENSMUSG00000024187 intron 4

Description: Protein ITFG3 (Itfg3)  
 Intron number: 4  
 Mouse chromosome: 17  
 Upstream exon length: 137  
 Downstream exon length: 133  
 Mouse intron length: 602  
 Intron alignment length: 667  
 Total murinae branch length: 0.25732  
 K\_score: 0.05686  
 Scaling factor: 0.6818

ENSMUSG00000024187 exon 4 (ORF 2)

|        |                                                                                    |    |
|--------|------------------------------------------------------------------------------------|----|
| Mus    | GAGAAACCCCTGTGGAGCCATCCAGCAGCTTTAGTGGGAAAGTTTCCATCCTGAGGCCCTCTGCTCCAGGTGCCTGACAT   | 80 |
| Rattus | GAGAAACCCCTGTGGAGCCATCCAGCAGCTTTAGTGGGAAAGTTTCCATCCTGAGGCCCTCTGCTCCAGGTGCCTGACAT   | 80 |
| Cavia  | GGAAACCCCTGTGGAAACCAAGCAGCAGAGCTTCAAGGGGAATGCGTCCATCCTGAGGCCCTCTGCTCCAGGTGCCTGATGT | 80 |
| Homo   | GGAAACCCCTGTGGAAACCAAGCAGCAGAGCTTCAAGGGGAATGCGTCCATCCTGAGGCCCTCTGCTCCAGGTGCCTGATGT | 80 |

  

|        |                                                           |     |
|--------|-----------------------------------------------------------|-----|
| Mus    | GATGGTGATGGTACCGGTACTCCAGACCTCCTGATCCTCGCCAGGACGGGACAGGAG | 137 |
| Rattus | GACGGTGACGGTACCGGTACTCCAGACCTCCTGATCCTCGCCAGGACGGGACAGGAG | 131 |
| Cavia  | GACAGTGATGGTACCGGTACTCCAGACCTCCTGATCCTCACCCAGAGGGGAGAGGAG | 131 |
| Homo   | GACGGTGATGGTACCGGTACTCCAGACCTCCTGATCCTCACCCAGGAGCGGGAGGAG | 131 |

ENSMUSG00000024187 exon 5 (ORF 0)

|        |                                                                                 |    |
|--------|---------------------------------------------------------------------------------|----|
| Mus    | GTCAGTGGAGCTCTCTATTACGGTAGCACTGGGTACCAGATTGGCCACAGAGGCCCTTGGTGTGGATGGAGATGGTGT  | 80 |
| Rattus | GTCAGTGGAGCTCTCTATTACGGTAGCACTGGGTACCAGATTGGCCACAGAGGCCCTTGGTGTGGATGGAGATGGTGT  | 80 |
| Cavia  | GTCAAGGGGTCACTCTATTACGGTAGCACTGGGTACCAGATTGGCCACAGAGGCCCTTGGTGTGGATGGAGATGGTGT  | 80 |
| Homo   | GTTAGTGGGCACTCTCTATTACGGTAGCACTGGGTACCAGATTGGCCACAGAGGCCCTTGGTGTGGATGGAGATGGTGT | 80 |

  

|        |                                                         |     |
|--------|---------------------------------------------------------|-----|
| Mus    | CGCCCTCCTTCACTGACCCAGAACTGGTGCTCAGTATATTCTCTGCCCCTGTG   | 133 |
| Rattus | CGCCCTCCTTCACTGACCCAGAACTGGTGCTCAGTATATTCTCTGCCCCTGTG   | 133 |
| Cavia  | CGCCCTTCTTCACTGACCCAGAAGACGGGTGCACACTACATTCTCTGCCCCTGTG | 133 |
| Homo   | CTTCCTCCTTCACTGACCCAGGACAGAGGTGCCACTACATTCTCTTCCCTGCG   | 133 |

ENSMUSG00000024187\_intron\_4

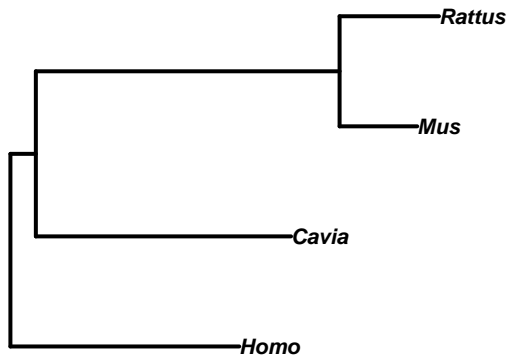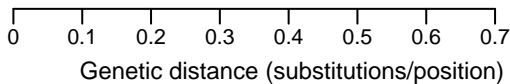













ENSMUSG00000026113 intron 19

Description: Type I inositol-3,4-bisphosphate 4-phosphatase (Inpp4a)  
 Intron number: 19  
 Mouse chromosome: 1  
 Upstream exon length: 127  
 Downstream exon length: 141  
 Mouse intron length: 272  
 Intron alignment length: 302  
 Total murinae branch length: 0.29315  
 K\_score: 0.04116  
 Scaling factor: 0.68333

ENSMUSG00000026113 exon 19 (ORF 2)

|        |                                                                                       |    |
|--------|---------------------------------------------------------------------------------------|----|
| Mus    | GAGAGGAGTTGGCCATGTTGGAGGACATGAGCCCTTGGAAATCATGGACCTGAGGAATGTGACCTTTAAAGTCACTCAGGGCC   | 80 |
| Rattus | GAGAGGAGTTGGCCATGTTGGAGGACATGAGCCCTTGGGATCATGGACCTGAGGAATGTGACCTTTAAAGTCACTCAGGGCC    | 80 |
| Cavia  | GTTGAGGAGCTTGGCCATGCTGGAGGACATGAGCCCTTGGGATCATGGACTTGAAGGAATGTGACCTTTAAAGTCACTCAGGGCC | 80 |
| Homo   | GGGAGGAGCTTGGCAATGCTGGAGGACATGAGCCCTTGGGATCATGGACTTGAAGGAATGTGACCTTTAAAGTCACTCAGGGCC  | 80 |

  

|        |                                                   |     |
|--------|---------------------------------------------------|-----|
| Mus    | ACTTCGAATGCATCAAATGACATGCTGCCGGTTCATCACAGGAAAACCG | 127 |
| Rattus | ACTTCGAATGCTTCTAGTGACATGCTGCCAGTTCATCACAGGAAAACCG | 127 |
| Cavia  | ACTTCCAGTGCATCAAGTACATGCTGCCCGTTCATCACAGGAAAATCG  | 127 |
| Homo   | ACTTCCAAGCGGCTCCGAGACATGCTGCCCGTTCATCACAGGAAAATCG | 127 |

ENSMUSG00000026113 exon 20 (ORF 1)

|        |                                                                                 |    |
|--------|---------------------------------------------------------------------------------|----|
| Mus    | GGATGGCTTTAAACGTGCGGATCCCTCTGCCAGGCCACTGTTTGACTCCCTCCCAAGAGATCCAGAGTGGCATGCTGC  | 80 |
| Rattus | GGATGGCTTTAAACGTGCGGATCCCTCTGCCAGGCCACTGTTTGACTCTCTCCCAAGAGATCCAGAGCGGCATGCTGC  | 80 |
| Cavia  | TGATGGCTTTAAATGTGCGGATCCCTCTGCCAGGCCGCTGTTTGACTCCCTGCCCGAGAGATCCAGAGCGGCATGCTGC | 80 |
| Homo   | CGATGGCTTTAAACGTGCGGATCCCTCTGCCAGGCCGCTGTTTGACTCCCTGCCCGAGAGATCCAGAGTGGCATGCTGC | 80 |

  

|        |                                                                |     |
|--------|----------------------------------------------------------------|-----|
| Mus    | TGCCGGTGCAGCCCTGTCCTCTTCAACGTGGGCATCAATGAGCAACAGACACTGGCTGAGAG | 141 |
| Rattus | TGCCGGTGCAGCCCTGTCCTCTTCAACGTGGGCATCAATGAGCAACAGACACTGGCCGAGAG | 141 |
| Cavia  | TGCCCGTGCAGCCGAGTCTCTTCAACGTGGGCATCAATGAGCAACAGACACTGGCCGAGAG  | 141 |
| Homo   | TGCCAGTGCAGCCCGTCTCTTCAACGTGGGCATCAATGAGCAACAGACACTGGCCGAGAG   | 141 |

ENSMUSG00000026113\_intron\_19

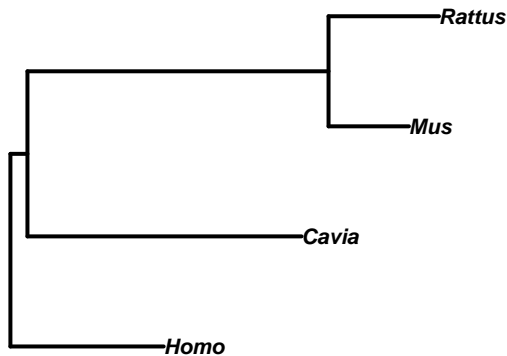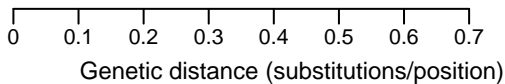

Mus  
Rattus  
Cavia  
Homo

GTAAGAT...CATCTAACACTCTCCAGCAGCCAGGCATCACT...GTGCTGCTCTGTGGGAC...ACACACCCTCTGTCTCTTGTCTTTACTC...C 88  
GTAAGAT...TGTCACTAACTTCGTCAACAGCGGGCTTCCCT...GTGTCATCCACACTGGGGCCTCACTGTGCTGTCTGTCTTTTGTCTTTACTC 104  
GTAAGACAGTTTCTGTGAAATCCATGCAAGCAGAGCACTTCTTCATTAATGTCCCTCCTATGGTTG...CATGCTCTGTCTTCAATTTTACTCCATTTCTTTCTG 103  
GTAAGACTGTGGGTTTAAATTTCTGTGAGCCAGAGAGGGCTTTTCATTTTGTTTATCTCAGGAAAG...GTACTCTTGTGAATTTTTTATCCTATTTGATTTT 101

Mus  
Rattus  
Cavia  
Homo

TTTAGACATTTGCATATAGCCTTCCAGACCCATACCAATGCGATAATTT...GTGTTTAAAGGCTCTAG...TGGGCATTGAAGCCACACC...TGGCAGGGCATCACCCAGG 192  
TTTGGAAAGATGGCTACAGCCTTCCGAGACCCATCTCAATTTGTAAATGAAAGGTCTTAAATGTCTAG...TGGGCATTGAAGCCGCTTGGCAGGGCATCACCCAGG 210  
TTAAAAACCAATGGCTACAAGCC...CTTAACTGTGCTCTAA...CAGGTTAAAGGCTGCT...TGGGTTTGAAGCCATAGAGCCAGGGCTGCTGCA 195  
TTAAATGCTCTGATTACAGGC...CCTAGCTTACTGAC...TCCCTTAAAGGCTCTGTTGCGATTGGCCATCACTAAGCCAGAGGGCCAGCCTTGG 197

Mus  
Rattus  
Cavia  
Homo

GCTCTGAAGTATGCTTTGGTCTGCGCTCTAGTCTCAGGGTCTGACCTCACCCCA...CTTTGCATTTTCTCTCTTCACTAG 272  
GCTCTAAGTGTCTTTGGTGTCTCCCTCCACAGCAGGCTCTGACCTCACCCCTCTTTTGGCTTTTCTCTCTCCACAG 291  
CGCCAGCCCTGGCTCTGTA...GGGCTCAGGCTGGCTTCTCTCTTCAACCTCTCCAG 255  
GCACTGACCCCTGCTCCGTG...GGCCCTGCGCTCAGACTGGTCTTCCCTCTCTCCAGCTTCTCCAG 262

ENSMUSG00000021610 intron 4

Description: Cleft lip and palate transmembrane protein 1-like protein (Clptm11)  
 Intron number: 4  
 Mouse chromosome: 13  
 Upstream exon length: 149  
 Downstream exon length: 79  
 Mouse intron length: 1035  
 Intron alignment length: 1346  
 Total murinae branch length: 0.14894  
 K\_score: 0.07618  
 Scaling factor: 0.68789

ENSMUSG00000021610 exon 4 (ORF 0)

|        |                                                                                                                                                                 |    |
|--------|-----------------------------------------------------------------------------------------------------------------------------------------------------------------|----|
| Mus    | C A A C A G A T A G A A G C C G A G A A G A A G C C A T C A A A C G C C C T G G A T G A A C C C G T C T C T C A C T G G C G A C C A A G G C T G A C C C T G A A | 80 |
| Rattus | C A G C A G A T A G A A G C A G A G A G A A G C C A T C G A A T G C C C T A C A T G A G C C C G T C T C T C A C T G G C G A C C A G G C T G A C C C T G A A     | 80 |
| Cavia  | - - - C A G A T C G A G G C T G A G A A G A A G C C A T C G A G T G C C C T G G A T G A G C C A T C T C T C A C T G G A G A C C C A G G C T A A C G C T G A A   | 77 |
| Homo   | - - - C A G A T C G A G G C G A G A A G A A G C C G A C G A G T G C C C T G G A T G A G C C A G T G T C C C A C T G G C G A C C G C G G C T G C C G C T G A A   | 77 |

  

|        |                                                                                                                                           |     |
|--------|-------------------------------------------------------------------------------------------------------------------------------------------|-----|
| Mus    | T G T G A T G G T G G A T G A C T T T G T C T T T G A T G G T T C C T C C C T G C C T G C A G A T G T G C A T C G G T A C A T G A A G A T | 149 |
| Rattus | T G T G A T G G T G G A T G A C T T G T C T T T G A T G G T T C C T C C C T G C C T G C A G A T G T G C A T C G A T A C A T G A A G A T   | 149 |
| Cavia  | C G T G A T G G T G G A C G A C T T T G T C T T C G A T G G A T C C T C C C T G C C T G C C G A T G T G C A C C G G T A C A T G A A A A T | 146 |
| Homo   | C G T G A T G G C G G A C A A C T T T G T C T T T G A C G G G T C C T C C C T G C C T G C C G A T G T G C A T C G G T A C A T G A A G A T | 146 |

ENSMUSG00000021610 exon 5 (ORF 1)

|        |                                                                                                                                                               |    |
|--------|---------------------------------------------------------------------------------------------------------------------------------------------------------------|----|
| Mus    | G A T T C A G C T T G G G A A G A C A G T G C A C T A C C T C C C C A T C C T G T T C A T T G A C C A G C T G A G C A A C C G G G T G A A A G A C C T G A T G | 79 |
| Rattus | G A T T C A G C T T G G G A A G A C A G T T C A C T A C C T C C C C A T C C T G T T C A T T G A C C A G C T G A G C A A C C G G G T G A A A G A C C T G A T G | 79 |
| Cavia  | G A T T C A G C T G G G G A A G A C G G T G C A C T A C C T T C C C A T C C T G T T C A T T G A C C A G C T G A G C A A C C C G T G A A G G A C T T G A T G   | 79 |
| Homo   | G A T T C A G C T G G G G A A A A C C G T G C A T T A C C T G C C C A T C C T G T T C A T C G A C C A G C T C A G C A A C C C G T G A A G G A C C T G A T G   | 79 |

ENSMUSG00000021610\_intron\_4

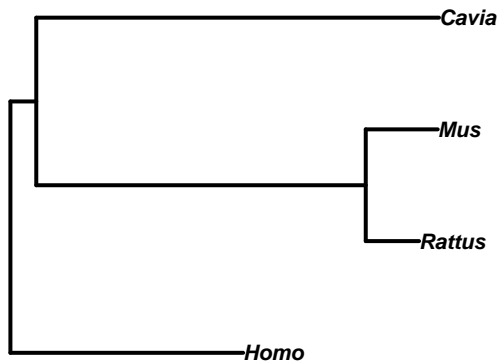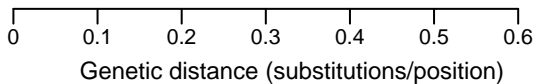

Mus Rattus Cavia Homo  
GTAAGT...CTCAAA...GGAACCCAGGGAGGAACTACTCTTAGAACTGAAAGCAGAGGAGGCATCAGTTTGTAGCCCAATAGAGTATCCATACCTGAGTTC 103  
GTAAGT...CCAGA...TGAACCCAGGGAGGAACTAGGCTTAGAACTGAAAGCAGAGGAGGCATCAGTTTGTAGCCCAATAGAGTATCCATACCTGAGTTC 103  
GTAAGTGGCTCCAGAGGCTGGAGCCGCTGGAGGCTGAGGCTGAGGCTGAGGCTGAGGCTGAGGCTGAGGCTGAGGCTGAGGCTGAGGCTGAGGCTGAGGCTGAGGCT 99  
GTAAGTGGCTCCAGAGGCTGGAGCCGCTGGAGGCTGAGGCTGAGGCTGAGGCTGAGGCTGAGGCTGAGGCTGAGGCTGAGGCTGAGGCTGAGGCTGAGGCTGAGGCT 88

Mus Rattus Cavia Homo  
TGGACTTGGCTGTGTTGTGAGCTGGCCCTGCCACAGAACCCATCCAGCTCTTTGG...TAACCACTTGGAAAGTTATGATAACCAAGTTGACTGACAAAGATTGAGAGA 207  
TGGACTTGGCTGTGTTGTGAGCTGGCCCTGCCACAGAACCCATCCAGCTCTTTGG...TAACCACTTGGAAAGTTATGATAACCAAGTTGACTGACAAAGATTGAGAGA 205  
TGGACTTGGCTGTGTTGTGAGCTGGCCCTGCCACAGAACCCATCCAGCTCTTTGG...TAACCACTTGGAAAGTTATGATAACCAAGTTGACTGACAAAGATTGAGAGA 184  
TGGACTTGGCTGTGTTGTGAGCTGGCCCTGCCACAGAACCCATCCAGCTCTTTGG...TAACCACTTGGAAAGTTATGATAACCAAGTTGACTGACAAAGATTGAGAGA 184

Mus Rattus Cavia Homo  
AAGAGTGA...AAATCCAGCTGGTACATCTGGCCCTTTAGCTAGGA...AAGTGTCCACCTGCACTGAAACAATAA...ACAAAGTTAGTGTGACTA 299  
AAGAGTGA...AAATCCAGCTGGTACATCTGGCCCTTTAGCTAGGA...AAGTGTCCACCTGCACTGAAACAATAA...ACAAAGTTAGTGTGACTA 302  
AAGAGTGA...AAATCCAGCTGGTACATCTGGCCCTTTAGCTAGGA...AAGTGTCCACCTGCACTGAAACAATAA...ACAAAGTTAGTGTGACTA 287  
AAGAGTGA...AAATCCAGCTGGTACATCTGGCCCTTTAGCTAGGA...AAGTGTCCACCTGCACTGAAACAATAA...ACAAAGTTAGTGTGACTA 283

Mus Rattus Cavia Homo  
CTGTACACTCTTTGGCTTTTGTGCTGTGCTCATGCTGCTGCTGCTGCTGCTGCTGCTGCTGCTGCTGCTGCTGCTGCTGCTGCTGCTGCTGCTGCTGCTGCTGCTGCT 399  
CTGTACACTCTTTGGCTTTTGTGCTGTGCTCATGCTGCTGCTGCTGCTGCTGCTGCTGCTGCTGCTGCTGCTGCTGCTGCTGCTGCTGCTGCTGCTGCTGCTGCTGCT 1400  
CTGTACACTCTTTGGCTTTTGTGCTGTGCTCATGCTGCTGCTGCTGCTGCTGCTGCTGCTGCTGCTGCTGCTGCTGCTGCTGCTGCTGCTGCTGCTGCTGCTGCTGCT 374  
CTGTACACTCTTTGGCTTTTGTGCTGTGCTCATGCTGCTGCTGCTGCTGCTGCTGCTGCTGCTGCTGCTGCTGCTGCTGCTGCTGCTGCTGCTGCTGCTGCTGCTGCT 351

Mus Rattus Cavia Homo  
GTGGCTAAATA...TAAATCAGTACTAGGGATTGAACTCAGGACCCCTGCTTACAAGGCAGGTGCTTATGCTGCTGAGCTAAATCCCCAGGCCGGAGAACTGTGCTTTAGATCACCACCTC 411  
GTGGCTAAATA...TAAATCAGTACTAGGGATTGAACTCAGGACCCCTGCTTACAAGGCAGGTGCTTATGCTGCTGAGCTAAATCCCCAGGCCGGAGAACTGTGCTTTAGATCACCACCTC 412  
GTGGCTAAATA...TAAATCAGTACTAGGGATTGAACTCAGGACCCCTGCTTACAAGGCAGGTGCTTATGCTGCTGAGCTAAATCCCCAGGCCGGAGAACTGTGCTTTAGATCACCACCTC 484  
GTGGCTAAATA...TAAATCAGTACTAGGGATTGAACTCAGGACCCCTGCTTACAAGGCAGGTGCTTATGCTGCTGAGCTAAATCCCCAGGCCGGAGAACTGTGCTTTAGATCACCACCTC 357

Mus Rattus Cavia Homo  
...TGGCTGACATCTTAGTATGTACTGT...GATGGTGTTCAGGA 457  
...TGGCTGACATCTTAGTATGTACTGT...GATGGTGTTCAGGA 458  
GACTGAGTCCCATCTGTGTAAATCTGACTGTGATGTGGGGGACAGACCGGTGTTGCTCCTTCCACACTCAGGGAGCCCATGTTGAAACCAGGGATTCAGGTG 398  
...TGGCTGACATCTTAGTATGTACTGT...GATGGTGTTCAGGA 398

Mus Rattus Cavia Homo  
TCCACGACAGATCATCAGTGTGGCTCATCTCCATGCTGCTGCTGCTGCTGCTGCTGCTGCTGCTGCTGCTGCTGCTGCTGCTGCTGCTGCTGCTGCTGCTGCTGCTGCT 566  
TCCACGACAGATCATCAGTGTGGCTCATCTCCATGCTGCTGCTGCTGCTGCTGCTGCTGCTGCTGCTGCTGCTGCTGCTGCTGCTGCTGCTGCTGCTGCTGCTGCTGCT 568  
TCCACGACAGATCATCAGTGTGGCTCATCTCCATGCTGCTGCTGCTGCTGCTGCTGCTGCTGCTGCTGCTGCTGCTGCTGCTGCTGCTGCTGCTGCTGCTGCTGCTGCT 687  
TCCACGACAGATCATCAGTGTGGCTCATCTCCATGCTGCTGCTGCTGCTGCTGCTGCTGCTGCTGCTGCTGCTGCTGCTGCTGCTGCTGCTGCTGCTGCTGCTGCTGCT 471

Mus Rattus Cavia Homo  
AGATTTCAAT...AGGACATTGATCTGTAAACAAGAACT...TGGCTCACTGAGCTA 622  
AGATTTCAAT...AGGACATTGATCTGTAAACAAGAACT...TGGCTCACTGAGCTA 672  
AGATTTCAAT...AGGACATTGATCTGTAAACAAGAACT...TGGCTCACTGAGCTA 728  
AGATTTCAAT...AGGACATTGATCTGTAAACAAGAACT...TGGCTCACTGAGCTA 519

Mus Rattus Cavia Homo  
AATCCCAACCCCTCATTTTAAATATAATAAAATCTGATTTGTGACA...TGGCTCACTGAGCTA 694  
AATCCCAACCCCTCATTTTAAATATAATAAAATCTGATTTGTGACA...TGGCTCACTGAGCTA 790  
AATCCCAACCCCTCATTTTAAATATAATAAAATCTGATTTGTGACA...TGGCTCACTGAGCTA 826  
AATCCCAACCCCTCATTTTAAATATAATAAAATCTGATTTGTGACA...TGGCTCACTGAGCTA 568

Mus Rattus Cavia Homo  
GTACAAAGGGAGGAGGCTGACCTTGTCTCCAGGC...TCCCTCAGAGAGCCTCTCAGAGTATGGGTAGCCCTCTCCAGGCTACCTGTGTGATAGCTAGTCCCT 803  
GTACAAAGGGAGGAGGCTGACCTTGTCTCCAGGC...TCCCTCAGAGAGCCTCTCAGAGTATGGGTAGCCCTCTCCAGGCTACCTGTGTGATAGCTAGTCCCT 838  
GTACAAAGGGAGGAGGCTGACCTTGTCTCCAGGC...TCCCTCAGAGAGCCTCTCAGAGTATGGGTAGCCCTCTCCAGGCTACCTGTGTGATAGCTAGTCCCT 892  
GTACAAAGGGAGGAGGCTGACCTTGTCTCCAGGC...TCCCTCAGAGAGCCTCTCAGAGTATGGGTAGCCCTCTCCAGGCTACCTGTGTGATAGCTAGTCCCT 860

Mus Rattus Cavia Homo  
ACCACTACTCTAGACAGAGGTGTGGGCTTCTACTTGGTGGCTGACTGATGCTGGGATGCTACATCTCTTGTCTCTGTTGGAAAGTTC...TAAAGTTC 907  
ACCACTACTCTAGACAGAGGTGTGGGCTTCTACTTGGTGGCTGACTGATGCTGGGATGCTACATCTCTTGTCTCTGTTGGAAAGTTC...TAAAGTTC 944  
ACCACTACTCTAGACAGAGGTGTGGGCTTCTACTTGGTGGCTGACTGATGCTGGGATGCTACATCTCTTGTCTCTGTTGGAAAGTTC...TAAAGTTC 945  
ACCACTACTCTAGACAGAGGTGTGGGCTTCTACTTGGTGGCTGACTGATGCTGGGATGCTACATCTCTTGTCTCTGTTGGAAAGTTC...TAAAGTTC 745

Mus Rattus Cavia Homo  
CCAGTACCAAGATGAGCCCAAG...TGAATGCTGGTGGGA...TGGGATACTCCTAGTTTCTCAATGATTTAGTACCCAGGAGATAAATCTGACACTGATTG 1009  
CCAGTACCAAGATGAGCCCAAG...TGAATGCTGGTGGGA...TGGGATACTCCTAGTTTCTCAATGATTTAGTACCCAGGAGATAAATCTGACACTGATTG 1040  
CCAGTACCAAGATGAGCCCAAG...TGAATGCTGGTGGGA...TGGGATACTCCTAGTTTCTCAATGATTTAGTACCCAGGAGATAAATCTGACACTGATTG 1033  
CCAGTACCAAGATGAGCCCAAG...TGAATGCTGGTGGGA...TGGGATACTCCTAGTTTCTCAATGATTTAGTACCCAGGAGATAAATCTGACACTGATTG 853

Mus Rattus Cavia Homo  
CAAGTTGTGTGCTTCAAAACCCAG 1035  
TAGATTGTGTGCTTTAAACCCAG 1066  
AAGGTTGCTTGTCTTCTG...TCCAG 1057  
TCCAAAGTGTGCTTTAA 877

ENSMUSG00000031090 intron 4

Description: Glutamine-dependent NAD (Nadsyn1)

Intron number: 4

Mouse chromosome: 7

Upstream exon length: 54

Downstream exon length: 90

Mouse intron length: 498

Intron alignment length: 688

Total murinae branch length: 0.13169

K\_score: 0.06118

Scaling factor: 0.688

ENSMUSG00000031090 exon 4 (ORF 1)

|        |                                                          |    |
|--------|----------------------------------------------------------|----|
| Mus    | GCCTATAATGCACCGGAATGTTCCCTACAACCTGCAGAGTCATCTTTCTCAACAG  | 54 |
| Rattus | GCCTATAATGCACCGGAATGTTCCCTACAACCTGCAGAGTCATCTTTCTCAACAG  | 54 |
| Cavia  | GCCTGTTGATGCACCGGAATGTTCCCTACAACCTGCAGAGTCATCTTTCTCAACAG | 54 |
| Homo   | GCCTGTTAATGCACCGGAATGTTCCCTACAACCTGCAGAGTCATCTTTCTCAACAG | 54 |

ENSMUSG00000031090 exon 5 (ORF 1)

|        |                                                                                  |    |
|--------|----------------------------------------------------------------------------------|----|
| Mus    | GAAGATCTGCTCATCAGACCCAAAGATGGCCTTGGCCAACGAAGGCAACTACCGGGAAGCTGCGCTGGTTTACCCCTGGA | 80 |
| Rattus | GAAGATCTGCTCATCAGACCCAAAGATGGCCTTGGCCAATGAAGGCAACTACAGGGAAGCTGCGCTGGTTTACCCCTGGG | 80 |
| Cavia  | GAGGATCTGCTCATCAGACCCAAAGATGGCCTTGGCAATGAAGGCAACTACCGTGAAGCTGCGCTGGTTTACCCCTAGGT | 80 |
| Homo   | GAAGATCTGCTCATCAGACCCAAAGATGGCCTTGGCCAATGAAGGCAACTACCGCGAGCTGCGCTGGTTTACCCCTGTGT | 80 |

  

|        |            |    |
|--------|------------|----|
| Mus    | CCAGGAGCCG | 90 |
| Rattus | CCAGGAGCCG | 90 |
| Cavia  | GAGGAGCCG  | 90 |
| Homo   | GAGGAGTCCG | 90 |

ENSMUSG00000031090\_intron\_4

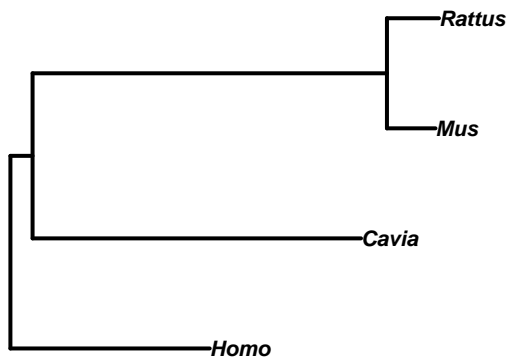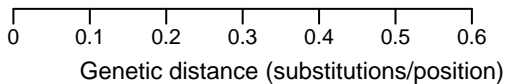



ENSMUSG00000010205 intron 10

Description: Ribonucleoprotein PTB-binding 1 (Raver1)

Intron number: 10

Mouse chromosome: 9

Upstream exon length: 75

Downstream exon length: 144

Mouse intron length: 459

Intron alignment length: 880

Total murinae branch length: 0.16701

K\_score: 0.08305

Scaling factor: 0.68806

ENSMUSG00000010205 exon 10 (ORF 0)

|        |                     |                   |                    |           |                  |    |
|--------|---------------------|-------------------|--------------------|-----------|------------------|----|
| Mus    | GATGTGGGACCTAGACCGA | ACTCTTCTCCCAACCTT | CGGGAACCAACCTTAGGG | CCTCATGGC | CCCAGCCGACACCAAG | 75 |
| Rattus | GATGTGGGACCTAGACCGG | CTCTCTCCCAACCTT   | CGGGAATCAAACTTAGGG | CCTCATGGC | CCCAGCCGACACCAAG | 75 |
| Cavia  | GATGTGGGACCTAGACCG  | CTCTCTCCCAACCTT   | CGGGAACCAACCTTAGGG | CCTCATGGC | CCCAGCCGACACCAAG | 75 |
| Homo   | GATCATGGGACCTAGACCG | CTCTCTCCCAACCTT   | CGGGAACCAACCTTAGGG | CCTCATGGC | CCCAGCCGACACCAAG | 75 |

ENSMUSG00000010205 exon 11 (ORF 0)

|        |                     |                |                  |                |           |           |    |
|--------|---------------------|----------------|------------------|----------------|-----------|-----------|----|
| Mus    | ATGTCCCCCACCCTAGCAG | GGCTTCAATGAGCC | CCGAAGTGGTGGAGGC | AGTGGGGGACCCCT | TCTCTCATT | TTACTCTGG | 80 |
| Rattus | ATGTCCCCCACCCTAGCAG | GGCTTCAATGAGCC | CCGAAGTGGTGGAGGC | AGTGGGGGACCCCT | TCTCTCATT | TTACTCTGG | 80 |
| Cavia  | ATGTCCCCCACCCTAGCAG | GGCTTCAATGAGCC | CCGAAGTGGTGGAGGC | AGTGGGGGACCCCT | TCTCTCATT | TTACTCTGG | 77 |
| Homo   | ATGTCCCCCACCCTAGCAG | GGCTTCAATGAGCC | CCGAAGTGGTGGAGGC | AGTGGGGGACCCCT | TCTCTCATT | TTACTCTGG | 80 |

  

|        |                     |              |                 |                |      |     |
|--------|---------------------|--------------|-----------------|----------------|------|-----|
| Mus    | CTCACCCACCTCCTACTT  | CACCAGTGGCCT | CAGGCTGGCCTCAAG | CAGAGCCACCTGAA | CAAG | 144 |
| Rattus | CTCACCCACCTCCTACTT  | CACCAGTGGCCT | CAGGCTGGCCTCAAG | CAGAGCCACCTGAA | CAAG | 144 |
| Cavia  | CTCACCCACCTCCTACTT  | CACCAGTGGCCT | CAGGCTGGCCTCAAG | CAGAGCCACCTGAA | CAAG | 141 |
| Homo   | CTGCCCCACTTTCCTACTT | CACCAGTGGCCT | CAGGCTGGCCTCAAG | CAGAGCCACCTGAA | CAAG | 144 |

ENSMUSG00000010205\_intron\_10

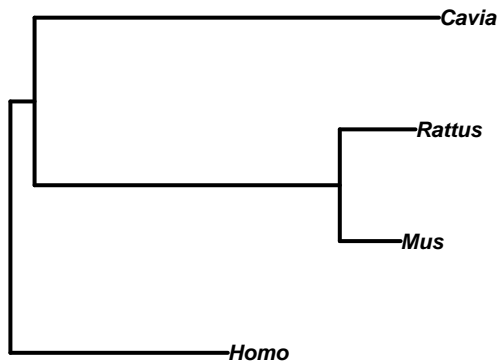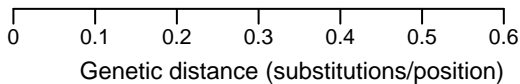

Mus 109  
Rattus 105  
Cavia 74  
Homo 72  
GTAAGAGCCCTAGATACCCCTGTGTCTGCAGCATATAGTATGGCTATGTAATAAAGTGGACATCGAGTCAGCACAGCTGTATAACAAGAAGTCTTCCCTTATTA  
GTAAGAACAAG--TGCCCTGTGTTTGCAGCGTACAGTATTGGCAGCGTAATAAAGTGGATGTAGCAGTCAGCACTAAGTGTAAACAAGAAGTCTTCCCTCCGTA  
GTAAGAGCC-----GGCGCTTACACCCAGCCCTGCTGAGCAAGTACCCCTGGCTGTGACAGATGGCTCCCTGAGC-----  
GTAAGAGCC-----AGCTTGGTATGGCATGTGTAGCAATCAGGTTTACGACATGACAGGCTGTGGCATGAGCTTAGTA

Mus 182  
Rattus 146  
Cavia 144  
Homo 182  
ACTGAGCTCCACAAG-----TCTTCCTATGTTGTCCAA-----  
ACTGAGCTCCACAAG-----GAGGCA--TCTTCCTATGTAATGCAA-----  
AATGAGCAGCGCAGACACTTGGCACTGAGTCCCGCTGTGAGGCTTTTC--AGCTGG--CTTCGATTTGGGCCCA-----  
GGCTGAAAGAGCAGACCTTGTATTTTGTGTTTGTGGTTTTITTAAGACAGGATCTTCACTGTGTTGCCAGGCTGGAGTGCAGTGGCTCCATGATAGCTCACTGT

Mus 231  
Rattus 178  
Cavia 231  
Homo 287  
---CTCAAACCTTCTAGCTGCAAGCA-----TITTAATTATC  
---GTCAAACCTTCTAGCTGCAAGCA-----TITTAATTATC  
---CCAGCCTCTTGGCTTGAAGCT---CCTGAGTAGCTGGACTGCAGGCATAGGCTGTCTGGGCTGCCTGACAGATTITTTGTTTITTAATTATC  
GGCTCAAACCTCTTGGCTTGAAGCTATCCTCCCACTTTGGCCTCCCAAAGTGTAGGATCAGAGGCATGAGGCACGATACGATGCAGGCATTGTT---ATTACTTCTT

Mus 270  
Rattus 266  
Cavia 339  
Homo 377  
ACCTTCAATGGGCACTAAGTCT-----GTTCCCTGGGGCTCAGCAGGGGCTCA-----CCCCATGGCTCACACAAGTGGTCAAGTCACTGTGAA--  
ACCTTCAATGGGCACTAAGTCT-----GTTCCCTGGGGCTCAGCAGGGGCTCA-----CCCCATGGCTCACACAAGTGGTCAAGTCACTGTGAA--  
ACTTTTGGCAAGGCTGGCTGACATTTCTCTCCGTCATCTGGAGCTGTGTAGCACTCAGTTGCTCTGGTGGTGGGAGTGGGCAAG  
GGCATCTATGGGCAAGTGGCTGACATTTCTCTCCGTCATCTGGAGCTGTGTAGCACTCAGTTGCTCTGGTGGTGGGAGTGGGCAAG

Mus 324  
Rattus 313  
Cavia 441  
Homo 463  
---GTGAAGTCACTGGGCTC-----AGAGCATGGTCTTCCCTGAGCCACTGAGGCTTATC  
---GTCAAACCTCACTGGGCTC-----AGAGCATGGTCTTCCCTGAGCCACTGAG--  
AAGGAGGCTGGATAAGCTTATCACTGACCCACAGAAAGCTCCTCTCTCGGAAGTCTCTGGA-----GACTAAGGCCAAGCGGGCCTCACATCCAGCTGTC  
ACAATTTCTGTC-----TGCCATTCCTGGGTGATGATCCTGGGTTCTGGAAGAGAGGAGGGGGTACCCACGTTCCAGCTCTC

Mus 420  
Rattus 398  
Cavia 493  
Homo 573  
CTCTTTGGTTCAGCTTCAATTTCTCAATGCTGTGGTCCAGAGGCTCCCGAGAAATATAACATGGACAAATGGAATCATGGTGGGCAAGGGT-----  
CTCTTTGGTTCAGCTTCAATTTCTCAATGCTGTGGTCCAGAGGCTCCCGAGAAATATAACATGGACAAATGGAATCATGGTGGGCAAGGGT-----  
CCAGCTCTGCTGCCAGCCTTGTATGGCACTCCGAGTCC-----CAGAAATATAACATGGACAAATGGAATCATGGTGGGCAAGGGT-----  
CTCAGCTCTATAGCCAAAGCTTACTCTTGCAAAGCCAGAACTGCCGGCATGGTGGCTACCCCTGTAATCCAGCCTTTGGAGGCGGAGGCGGGGGGATCACTG

Mus 420  
Rattus 398  
Cavia 493  
Homo 483  
AGGTCGTGAGTGTGAGACCAGTCTGACCAACATGGAGAAACCCCGTCTCTACTAAAATACAAAAATTACTGGGCATGGTGGCCATGCCTGTAATCCAGCTACTCG

Mus 459  
Rattus 441  
Cavia 525  
Homo 793  
---LCCGGCCATGGTTTC-----CTGAGCTGAACCTTTCTCTGGAG  
---TCCAACCTGATTTACCTCAGCTCAGCTGAACTTTCTCTGGAG  
---ACCCCTTGTGATCAGGC--CCTTCTCTCGAG  
GGAGGCTGAGGCAGGAAATCGCTTGAACCTGGGAGGCAAGGGAAAGATTGTATACAAAGGGCTGGCTACTACATTTCTCTCTTCACTGCAACCGGCTTCTCTACAG



ENSMUSG00000035078 intron 7

Description: Myotubularin-related protein 9 (Mtmr9)

Intron number: 7

Mouse chromosome: 14

Upstream exon length: 142

Downstream exon length: 221

Mouse intron length: 1393

Intron alignment length: 2256

Total murinae branch length: 0.18768

K\_score: 0.07183

Scaling factor: 0.689

ENSMUSG00000035078 exon 7 (ORF 1)

|        |                                                                                    |    |
|--------|------------------------------------------------------------------------------------|----|
| Mus    | GGAAGGTGCATCAGTGTGATTTCATGGGACAGAAAGGAACTGATTCCACACTGCAGGTGACTTCTCTGGCCCAAGATCATCC | 80 |
| Rattus | GGAAGGTGCATCAGTGTGATTTCATGGGACAGAAAGGAACTGATTCCACACTGCAGGTGACTTCTCTGGCCCAAGATCATCC | 80 |
| Cavia  | GGAAGGTGCATCAGTGTGATTTCATGGGACAGAAAGGAACTGATTCCACACTGCAGGTGACTTCTCTGGCCCAAGATCATCC | 80 |
| Homo   | GGAAGGAGCATCAATATTTGATTCACGGACAGAAAGGAACTGATTCCACACTGCAGGTGACTTCTCTGGCCCAAGATCATCC | 80 |

  

|        |                                                                    |     |
|--------|--------------------------------------------------------------------|-----|
| Mus    | TGGAACCAAGAAGCAGGACCATCCGAGGCTTTGAGGCCCTGATAGAGAGGGAGTGGCTGCAG     | 142 |
| Rattus | TGGAACCGAGAAGCAGAACCATCCGAGGCTTTGAGGCCCTGATAGAGCGAGAGTGGCTGCAG     | 142 |
| Cavia  | TGGAACCGAGAAGCAGGACCATCCGAGGCTTTGAGGCCCTGATAGAGAGGGAGTGGCTGCAG     | 142 |
| Homo   | TAGATCCAAAGAAGCAGGACCATTCGTGCTTTTGAAGGCCCTGATTTGAAAAGAGAGTGGCTGCAG | 142 |

ENSMUSG00000035078 exon 8 (ORF 0)

|        |                                                                                      |    |
|--------|--------------------------------------------------------------------------------------|----|
| Mus    | GCTGGTCAACCAATCCAAACAGCGCTGTGCACAGTCAGCCTATTGCAGCAGCAAGCAGAAGTGGGAGGCCCCCGTGTTCCT    | 80 |
| Rattus | GCTGGTCAACCAATCCAAACAGCGCTGTGCACAGTCAGCCTATTGCAGCAGCAAGCAGAAGTGGGAGGCCCCCGTGTTCCT    | 80 |
| Cavia  | GCTGGTCAACCAATCCAAACAGCGCTGTGCACAGTCAGCCTATTGCAGCAGCAAGCAGAAGTGGGAGGCCCCCGTGTTCCT    | 80 |
| Homo   | GCTGGTCAACCAATCCAAACAGCGCTGTGCACAGTCAGCCTATTGTAAACACCAAGCAGAAGTGGGAGGCCCTCCTGTATTCCT | 80 |

  

|        |                                                                               |     |
|--------|-------------------------------------------------------------------------------|-----|
| Mus    | TCTCTTCTGGACTGCCTGTGGCAGATCCTCCGGCAGTCCCTTTCCTCCTTCGAGTTTAAATGAGCATTTCATCATGG | 160 |
| Rattus | TCTCTTCTGGACTGCCTGTGGCAGATCCTCCGGCAGTCCCTTTCCTCCTTCGAGTTTAAATGAGCATTTCATCATGG | 160 |
| Cavia  | TCTCTTCTGGACTGCCTGTGGCAGATCCTCCGGCAGTCCCTTTCCTCCTTCGAGTTTAAATGAGCATTTCATCATGG | 160 |
| Homo   | TCTCTTCTTGGACTGCCTGTGGCAGATCCTTCGTCAAGTTCCCTGTTCTTTTGAATGAGATTTCATCATCATGG    | 160 |

ENSMUSG00000035078\_intron\_7

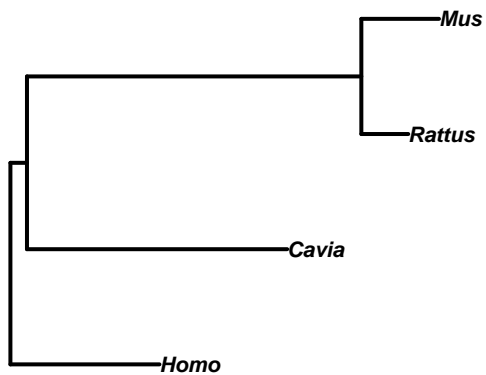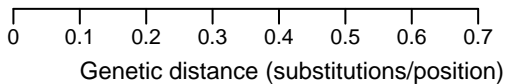



ENSMUSG00000038567 intron 2

Description: 1,25-dihydroxyvitamin D (Cyp24a1)

Intron number: 2

Mouse chromosome: 2

Upstream exon length: 191

Downstream exon length: 94

Mouse intron length: 756

Intron alignment length: 1579

Total murinae branch length: 0.16771

K\_score: 0.08597

Scaling factor: 0.69088

ENSMUSG00000038567 exon 2 (ORF 0)

|        |                                                                                   |    |
|--------|-----------------------------------------------------------------------------------|----|
| Mus    | TCCGGATGAAGCTGGGCTTCCTTCGACTCGGTGCATCTGGGCTCGCCGAGCCTGCTGGAAGCTCTGTACCGCACAGAGAGG | 80 |
| Rattus | TCCGGATGAAGCTGGGCTTCCTTCGACTCGGTGCATCTGGGCTCGCCGAGCCTGCTGGAAGCTCTGTACCGCACAGAGAGG | 80 |
| Cavia  | TCCGGATGAAGCTGGGCTTCCTTCGACTCGGTGCATCTGGGCTCGCCGAGCCTGCTGGAAGCTCTGTACCGCACAGAGAGG | 80 |
| Homo   | TCCGGATGAAGCTGGGCTTCCTTCGACTCGGTGCATCTGGGCTCGCCGAGCCTGCTGGAAGCTCTGTACCGCACAGAGAGG | 80 |

  

|        |                                                                                    |     |
|--------|------------------------------------------------------------------------------------|-----|
| Mus    | GCGCATCCCCAGCGGCTAGAGATCAAACCTTGGAAA GCCTATCGGGACCATCGCAACGAAGCCTACGGGGCTGATGATCCT | 160 |
| Rattus | GCGCATCCCCAGCGGCTAGAGATCAAACCTTGGAAA GCCTATCGGGACCATCGCAACGAAGCCTACGGGGCTGATGATCCT | 160 |
| Cavia  | GCGCATCCCCAGCGGCTAGAGATCAAACCTTGGAAA GCCTATCGGGACCATCGCAACGAAGCCTACGGGGCTGATGATCCT | 160 |
| Homo   | GCGCATCCCCAGCGGCTAGAGATCAAACCTTGGAAA GCCTATCGGGACCATCGCAACGAAGCCTACGGGGCTGATGATCCT | 160 |

ENSMUSG00000038567 exon 3 (ORF 1)

|        |                                                                                    |    |
|--------|------------------------------------------------------------------------------------|----|
| Mus    | GGAAGGACAGGAGCTGGCAGCGGGTCCGCAGCGCCTTCCAAAAGAAACTCATGAA GCCCGTGGAAATCATGAAGCTGGACA | 80 |
| Rattus | GGAAGGACAGGAGCTGGCAGCGGGTCCGCAGCGCCTTCCAAAAGAAACTCATGAA GCCCGTGGAAATCATGAAGCTGGACA | 80 |
| Cavia  | GGAAGGACAGGAGCTGGCAGCGGGTCCGCAGCGCCTTCCAAAAGAAACTCATGAA GCCCGTGGAAATCATGAAGCTGGACA | 80 |
| Homo   | GGAAGGACAGGAGCTGGCAGCGGGTCCGCAGCGCCTTCCAAAAGAAACTCATGAA GCCCGTGGAAATCATGAAGCTGGACA | 80 |

  

|        |                 |    |
|--------|-----------------|----|
| Mus    | AGAAAATCAATGAG  | 94 |
| Rattus | AGAAAATCAATGAG  | 94 |
| Cavia  | GCAAAAATCAATGAG | 94 |
| Homo   | ACAAAATCAATGAG  | 94 |

ENSMUSG00000038567\_intron\_2

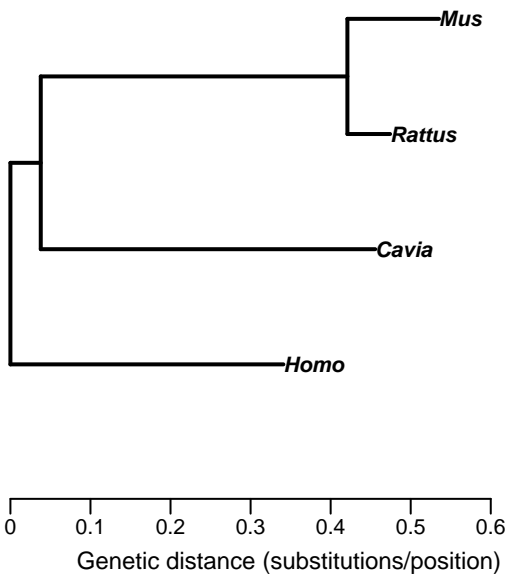

Mus Rattus Cavia Homo  
GTGAGTCAGTCCCTCTGCTGGAAGGAGACGATGG...GAGGCTGAACGTGCCGACAGTGGGAAGGGGAGTCGTAGAGTTCCTGGGA... 88  
GTG...AGTCCCTTCTGCTGGTGGAGGGCGGTGG...GGGCTGGCGTGGGGAGAAAGGAGAGGGGAGTGGTTAGAGTTCCTAGCAGT... 88  
GTG...AGTCCCTTCTGCTGGTGGAGGGCGGTGG...GGGCTGGCGTGGGGAGAAAGGAGAGGGGAGTGGTTAGAGTTCCTAGCAGT... 87  
GTG...AGTCCCTTCTGCTGGTGGAGGGCGGTGG...GGGCTGGCGTGGGGAGAAAGGAGAGGGGAGTGGTTAGAGTTCCTAGCAGT... 106

Mus Rattus Cavia Homo  
CCTATGAGAACGAATATAAAGCCCTGCTACCTAGAGCTGGTGGCATCCTGAA...ATTGTGCTGTAGAGAGTGGGTT... 170  
CTTATGAGAACGAATATAAAGCCCTGCTACCTAGAGCTGGTGGCATCCTGAA...ATTGTGCTGTAGAGAGTGGGTT... 170  
CTTATGAGAACGAATATAAAGCCCTGCTACCTAGAGCTGGTGGCATCCTGAA...ATTGTGCTGTAGAGAGTGGGTT... 192  
CTTATGAGAACGAATATAAAGCCCTGCTACCTAGAGCTGGTGGCATCCTGAA...ATTGTGCTGTAGAGAGTGGGTT... 212

Mus Rattus Cavia Homo  
TCACAAGCATTACAG... 185  
TCACAAGCATTACAG... 185  
CGCTTTGCCCTCGGA... 207  
CTGGTTGCTCTGGCAACAGGGCAGGGCCACACCCCTCCCATCAAAGAAAGCCCAAACAGGGTTGTACCAACTGTGGTGTTCAGACTCTTGGCAGGATGAGGTTCTGA 322

Mus Rattus Cavia Homo  
AGTCAGCGTACCAGGCAACATCTTATACAAACAAAATTATCCCTTAAACTCCCTGAAACACCTTGTAAAGCTCAAAGGGAGGAGTTAGCCTCTTTGGCTTTTACAGT 432

Mus Rattus Cavia Homo  
GACATTTTCTGCAGAGGATTGGGGACATGCCTTATTTCTACTTGTAAAGGTGGAATAAGGAGGGATATCAAAGTTGTGTTTTAGGTCGACAAATGCTACTATGGGATGT 542

Mus Rattus Cavia Homo  
GATTCTTCTGCTTTTTAGTTGTTAGCATTAAACAAGTTAGCACCTTTATTTACCCCAAACCTGTAAAGCTAACTGTTATATTTCCAGGATATAATGACTGGAATTA 652

Mus Rattus Cavia Homo  
AACCTTATTAATCACGGTCTTACAGGCTGTATGGTCTGCTATGGGGCAGGTGCCTACAAGTGACCGATCGCAAAGGCTTTTTATTACTCCAGTGACTCTCTGACTG 762

Mus Rattus Cavia Homo  
...TGAAGGGAATGCACACATG... 203  
...TGAAGGGAATGCACACATG... 205  
AGCTTATTGTACCAATAATGGAAAAGTGCACATTTGAGGGTGTGTTTAAATAAATAAAAGTGTGATGCCAAGTCAAGTAAAGTGGAAATAAAAGTTTGTCCCTCAAC 316  
ATGTTATTATTTGGAGGCCATGCAAAAATCTAATCTGAGATATTTGTTAAATAAATAAGGCGCACAC...GCAATGAGTTGAAAAGAGCAAGATTTCTTCCGTAAG 867

Mus Rattus Cavia Homo  
...GTGGCTCCCAACAGGACACATCAAAGCAACATGC 240  
...GTGGCTCCCAACAGGACACATCAAAGCAACATGC 242  
...GTGGCTCCCAACAGGACACATCAAAGCAACATGC 335  
...GTGGCTCCCAACAGGACACATCAAAGCAACATGC 977

Mus Rattus Cavia Homo  
CCGCTTATTGGGCTTACCTTCAAGTCTGCTTTGGGCAAGA...CTTAAACCTAAGCTCAAACCA... 306  
CCGCTTATTGGGCTTACCTTCAAGTCTGCTTTGGGCAAGA...CTTAAACCTAAGCTCAAACCA... 308  
CCACTTAAATATGGGCTCAATCTTCTCACAGGATCCAGGTTAAGAGGACAGTGCCTTCCATGGGCTCTGTAAACAAGCA...GCCCT 481  
CCAAAATATCTGGACTTCAACTTTTGGTGGAAATCTTGTAGGAGGAAGGTGCTT...TTTCTCCTATTTGTCAAACATTGTCAAAGATGATCACTATTTTATCCG 1085

Mus Rattus Cavia Homo  
AATAATTTAAGCTGTGACAAATTTAATACGTTTATAATGATTTCCGGTCCATTCATCACTCAAGTCCCTCTGTGATCTCCCAACCACTCTATGAGATTCT 415  
AATAATTTAAGCTGTGACAAATTTAATACGTTTATAATGATTTCCGGTCCATTCATCACTCAAGTCCCTCTGTGATCTCCCAACCACTCTATGAGATTCT 417  
GATACCTTAAATGCTTAA...ATTCTCTGGGTATTTCTTGGCATGATCT 504  
AATAATTTAAGCTGTGACAAATTTAATACGTTTATAATGATTTCCGGTCCATTCATCACTCAAGTCCCTCTGTGATCTCCCAACCACTCTATGAGATTCT 1132

Mus Rattus Cavia Homo  
CCCTCTGCCCAGAAATTTCTCTCCCTATTTCAAGTCTTTTTTAA...TTTGTGTTTAACTCTGTGAATTTGCTCCATGACCATAGGTGGGGCTATTTAGAGCACAG 525  
CCCTCTGCCCAGAAATTTCTCTCCCTATTTCAAGTCTTTTTTAA...TTTGTGTTTAACTCTGTGAATTTGCTCCATGACCATAGGTGGGGCTATTTAGAGCACAG 522  
C... 505  
C... 1133

Mus Rattus Cavia Homo  
ATCTTGTCAAGGCTACACACTACTGTTGAAAAATTGACTACCCCTTCCATTAAGCGCCATAAGCATCAATCAGCTCAGAGAGAGACAGTGTAGGCTCTCTCGGGTCAGT 614  
AAGTTG...GAGGCTACACTACTGTTGAAAAATTGACTACCCCTTCCATTAAGCGCCATAAGCATCAATCAGCTCAGAGAGAGACAGTGTAGGCTCTCTCGGGTCAGT 630  
... 605  
... 1133

Mus Rattus Cavia Homo  
ATGGCTGATGGCGCCCGAAATTTCAATGAGAGCTAAGATTCTGAGACTTT...CAGGCGATCTTGGGGTTAGTTTTGCGCTCCCGAATCACTGCCAGGCTC 721  
ATGGCTGATGGCGCCCGAAATTTCAATGAGAGCTAAGATTCTGAGACTTT...CAGGCGATCTTGGGGTTAGTTTTGCGCTCCCGAATCACTGCCAGGCTC 719  
... 558  
... 1199

Mus Rattus Cavia Homo  
TTTTCTGGTCTTAAACCATACCCCTTCTCTG...CAG 756  
TTTTCTGGTCTTAAACCATACCCCTTCTCTG...CAG 754  
TTTTCTGGTCTTAAACCATACCCCTTCTCTG...CAG 596  
TTTTCTGGTCTTAAACCATACCCCTTCTCTG...CAG 1238





ENSMUSG00000030374 intron 9

Description: Striatin-4 (Strn4)  
 Intron number: 9  
 Mouse chromosome: 7  
 Upstream exon length: 95  
 Downstream exon length: 176  
 Mouse intron length: 1345  
 Intron alignment length: 1457  
 Total murinae branch length: 0.17228  
 K\_score: 0.04523  
 Scaling factor: 0.69218

ENSMUSG00000030374 exon 9 (ORF 2)

|        |                                                                                     |    |
|--------|-------------------------------------------------------------------------------------|----|
| Mus    | -----ACGCTCTTCATCATGGACACTATCGGGGGCGGGGAGGTGAGCCCTGGGGGACTTGGCCAGAT                 | 59 |
| Rattus | GTTTCCTTTGGCTTCTCCTCAGACGTCTTCATCATGGACACTATCGGGGGCGGGGAGGTGAGCCCTGGGGGACTTGGCCAGAT | 80 |
| Cavia  | GTTTCCTTTGGCTTCTCCTCAGACGTCTTCATCATGGACACTATCGGGGGCGGGGAGGTGAGCCCTGGGGGACTTGGCCAGAT | 80 |
| Homo   | GTTTCCTTTGGCTTCTCCTCAGACGTCTTCATCATGGACACTATCGGGGGCGGGGAGGTGAGCCCTGGGGGACTTGGCCAGAT | 80 |

  

|        |                                      |     |
|--------|--------------------------------------|-----|
| Mus    | CTCACCGTCACCAATGACAACGACCTCAGCTGTGAT | 95  |
| Rattus | CTCACCGTCACCAATGACAACGACCTCAGCTGTGAT | 116 |
| Cavia  | CTCACCGTCACCAATGACAACGACCTCAGCTGTGAT | 116 |
| Homo   | CTCACCGTCACCAATGACAACGACCTCAGCTGTGAT | 116 |

ENSMUSG00000030374 exon 10 (ORF 0)

|        |                                                                                  |    |
|--------|----------------------------------------------------------------------------------|----|
| Mus    | CTGTCTGACAGCAAAGAAGCTTTCAAGAAGACATGGAACCCCAAGTTTACCCTCCGCTCACACTACGATGGCATCCGCTC | 80 |
| Rattus | CTGTCTGACAGCAAAGAAGCTTTCAAGAAGACATGGAACCCCAAGTTTACCCTCCGCTCACACTACGATGGCATCCGCTC | 80 |
| Cavia  | CTGTCTGACAGCAAAGAAGCTTTCAAGAAGACATGGAACCCCAAGTTTACCCTCCGCTCACACTACGATGGCATCCGCTC | 80 |
| Homo   | CTGTCTGACAGCAAAGAAGCTTTCAAGAAGACATGGAACCCCAAGTTTACCCTCCGCTCACACTACGATGGCATCCGCTC | 80 |

  

|        |                                                                                   |     |
|--------|-----------------------------------------------------------------------------------|-----|
| Mus    | CCTGGCCTTCCACCACAGCCAGTCAGCACTGCTTACTGCCTCTGAGGATGGCACACTCAAAGCTTGGAAACCTGCAGAAGG | 160 |
| Rattus | CCTGGCCTTCCACCACAGCCAGTCAGCACTGCTTACTGCCTCTGAGGATGGCACACTCAAAGCTTGGAAACCTGCAGAAGG | 160 |
| Cavia  | CCTGGCCTTCCACCACAGCCAGTCAGCACTGCTTACTGCCTCTGAGGATGGCACACTCAAAGCTTGGAAACCTGCAGAAGG | 160 |
| Homo   | CCTGGCCTTCCACCACAGCCAGTCAGCACTGCTTACTGCCTCTGAGGATGGCACACTCAAAGCTTGGAAACCTGCAGAAGG | 160 |

ENSMUSG00000030374\_intron\_9

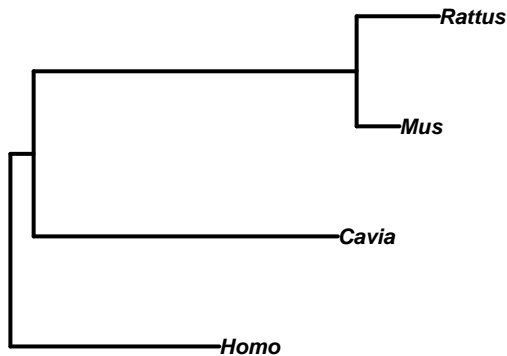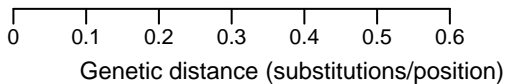





ENSMUSG00000021559 intron 3

Description: Death-associated protein kinase 1 (Dapk1)

Intron number: 3

Mouse chromosome: 13

Upstream exon length: 139

Downstream exon length: 130

Mouse intron length: 1197

Intron alignment length: 1525

Total murinae branch length: 0.17118

K\_score: 0.05749

Scaling factor: 0.69278

ENSMUSG00000021559 exon 3 (ORF 1)

|        |                                                                                     |    |
|--------|-------------------------------------------------------------------------------------|----|
| Mus    | TGTTGCAGGAGGCTGAGCTGTTTGACTTCTGGCTGAGAAAGGAATCTCTGACTGAAAGAGGAGGCAACGGAATTCCTTAAAGC | 80 |
| Rattus | TGTTGCAGGAGGCGAGCTGTTTGACTTCTGGCTGAGAAAGGAATCTCTGACTGAAAGAGGCAACGGAATTCCTTAAAGC     | 80 |
| Cavia  | CGTTGCAGGCTGGCGAGCTGTTTGACTTCTTAGCTGAAAAGGAATCTCTGACTGAAAGAGGCAACGGAATTCCTTAAAGC    | 80 |
| Homo   | CGTTGCAGGCTGGCGAGCTGTTTGACTTCTTAGCTGAAAAGGAATCTCTGACTGAAAGAGGCAACGGAATTCCTTAAAGC    | 80 |

  

|        |                                                              |     |
|--------|--------------------------------------------------------------|-----|
| Mus    | AGATTCTCAGCGGCCTTTACTACCTGCACTCACTGCAGATCGGTTCACTTTGACCTGAAG | 139 |
| Rattus | AGATTCTCAGCGGCCTTTACTACCTGCACTCACTGCAGATCGGTTCACTTTGACCTGAAG | 139 |
| Cavia  | AGATTCTTAAATGGTGTTACTACCTGCACTCGCTTCAATCGGCCACTTTGACCTGAAG   | 139 |
| Homo   | AAATTCTTAAATGGTGTTACTACCTGCACTCGCTTCAATCGGCCACTTTGATCTTAAAG  | 139 |

ENSMUSG00000021559 exon 4 (ORF 0)

|        |                                                                                  |    |
|--------|----------------------------------------------------------------------------------|----|
| Mus    | CCGGAAAACATAATGCTTCTGGATAGAAATGTGCCAAACCTCGGATCAAGATCATAGACTTTGGCTTGGCCCATAAAAAT | 80 |
| Rattus | CCGGAAAACATAATGCTTCTGGATAGAAATGTGCCAAACCTCGGATCAAGATCATAGACTTTGGCTTGGCCCATAAAAAT | 80 |
| Cavia  | CCTGAGAACATAATGCTTTGGATAGAAATGTGCCAAACCTCGGATCAAAATCATCGACTTTGGCTTGGCCCATAAAAAT  | 80 |
| Homo   | CCTGAGAACATAATGCTTTGGATAGAAATGTGCCAAACCTCGGATCAAGATCATAGACTTTGGCTTGGCCCATAAAAAT  | 80 |

  

|        |                                                     |     |
|--------|-----------------------------------------------------|-----|
| Mus    | TGACTTTGGAAAATGAATTCAAAAACATATTTGGGACACCAGATTTGTGG  | 130 |
| Rattus | TGACTTTGGAAAATGAATTCAAAAACATATTTGGGACACCAGATTTGTGG  | 130 |
| Cavia  | TGACTTTGGAAAATGAATTCAAAAACATATTTGGGACACCAGATTTGTGG  | 130 |
| Homo   | TGACTTTGGAAAATGAATTTAAAAACATATTTGGGACCTCCAGATTTGTGG | 130 |

ENSMUSG00000021559\_intron\_3

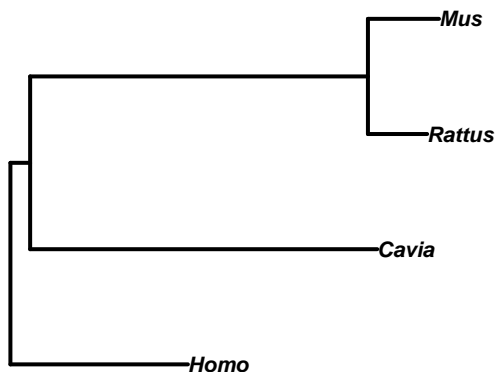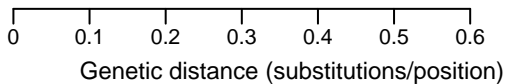



ENSMUSG00000021559 intron 12

Description: Death-associated protein kinase 1 (Dapk1)

Intron number: 12

Mouse chromosome: 13

Upstream exon length: 99

Downstream exon length: 99

Mouse intron length: 647

Intron alignment length: 1450

Total murinae branch length: 0.20007

K\_score: 0.04469

Scaling factor: 0.69365

ENSMUSG00000021559 exon 12 (ORF 0)

|        |                                                                                   |    |
|--------|-----------------------------------------------------------------------------------|----|
| Mus    | CATGGGACACCTCCATTACTGATTGGCGCAGGCTGTGGCAACATCCAGATGTTACAGTTACTCATAAAAAGAGGGCTCAAG | 80 |
| Rattus | CATGGGACACCTCCATTACTGATTGGCGCAGGCTGTGGCAACATCCAGATGTTACAGTTACTCATAAAAAGAGGGCTCAAG | 80 |
| Cavia  | CATGGGACACCTCCATTACTGATTGGCGCAGGCTGTGGCAACATCCAGATGTTACAGTTACTCATAAAAAGAGGGCTCAAG | 80 |
| Homo   | CATGGGACACCTCCATTACTGATTGGCGCAGGCTGTGGCAACATCCAGATGTTACAGTTACTCATAAAAAGAGGGCTCAAG | 80 |

  

|        |                     |    |
|--------|---------------------|----|
| Mus    | GATTGACGTCCAGGATAAG | 99 |
| Rattus | GATTGACGTCCAGGATAAG | 99 |
| Cavia  | AATTGATGTCCAGGATAAG | 99 |
| Homo   | AATTGATGTCCAGGATAAG | 99 |

ENSMUSG00000021559 exon 13 (ORF 0)

|        |                                                                                |    |
|--------|--------------------------------------------------------------------------------|----|
| Mus    | GGAGGATCCAATGCCATCTACTGGGCCTCTCGGCATGGCCATGTGGATACTTTGAAATTTCTCAATGAGAACAATGCC | 80 |
| Rattus | GGAGGATCCAATGCTATCTACTGGGCCTCTCGGCATGGCCATGTGGATACTTTGAAATTTCTCAATGAGAACAATGCC | 80 |
| Cavia  | GGAGGATCCAATGCTGCTACTGGGCAGCTCGGCATGGCCATGTGGATACTTTGAAATTTCTCAATGAGAACAATGCC  | 80 |
| Homo   | GGAGGATCCAATGCCGCTACTGGGCCTCTCGGCATGGCCATGTGGATACTTTGAAATTTCTCAATGAGAACAATGCC  | 80 |

  

|        |                     |    |
|--------|---------------------|----|
| Mus    | TTTGGATGTTAAAGACAAG | 99 |
| Rattus | TTTGGATGTTAAAGACAAG | 99 |
| Cavia  | TTTGGATGTGAAGACAAG  | 99 |
| Homo   | TTTGGATGTGAAGACAAG  | 99 |

ENSMUSG00000021559\_intron\_12

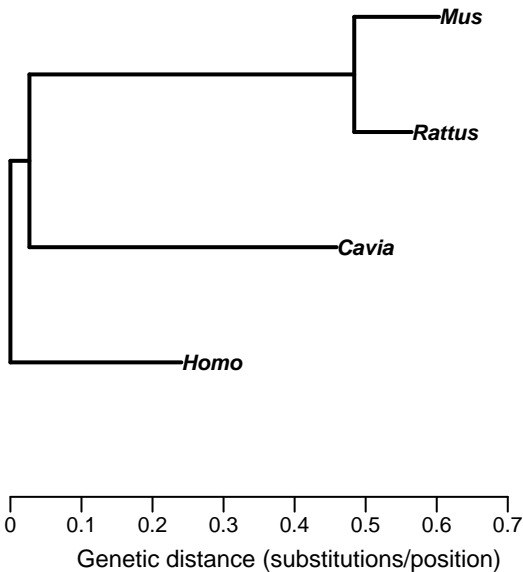



ENSMUSG00000021499 intron 5

Description: Cation channel sperm-associated protein 3 (Catsper3)

Intron number: 5

Mouse chromosome: 13

Upstream exon length: 141

Downstream exon length: 120

Mouse intron length: 382

Intron alignment length: 444

Total murinae branch length: 0.19633

K\_score: 0.06139

Scaling factor: 0.69488

ENSMUSG00000021499 exon 5 (ORF 0)

|        |                                                                                    |    |
|--------|------------------------------------------------------------------------------------|----|
| Mus    | GTTGATGGCTGSACTGACCTGCAGGAAGAGCTGGACAACAAGGAAGTTTACTGTGAGCCCGGGCGTTTACTATCCTCTTCAT | 80 |
| Rattus | GTTGATGGCTGSACTAAGCTTACAGGAGCAACTGGACAACGGGAAGTTTACTGTGAGCCCGGGCATTTACCATCGTCTTCAT | 80 |
| Cavia  | GTTGATGGCTGSACTGACCTGCAGGAGCAGCTGGACAACGGAAGTTTACTGTGAGCCCGAATTTACCATCGTCTTCAT     | 80 |
| Homo   | GTTGATGGCTGSACTGACCTGCAGGAAGAGCTGGACAACGGAAGTTTACTGTGAGCCCGGGCATTTACCATCGTCTTCAT   | 80 |

  

|        |                                                             |     |
|--------|-------------------------------------------------------------|-----|
| Mus    | CTTGCTTGCATCCTTCATCTTCTCAACATGTTTGTGGTGTGATGATCATGCACACGGAG | 141 |
| Rattus | CTTGCTTGCCTCCTTCATCTTCTCAACATGTTTGTGGTGTGATGATCATGCACACAGAG | 141 |
| Cavia  | CTTGCTTGCCTCCTTCATCTTCTCAACATGTTTGTGGTGTGATGATCATGCACACGGAG | 141 |
| Homo   | CTTGCTTGCCTCCTTCATCTTCTCAACATGTTTGTGGTGTGATGATCATGCACACAGAG | 141 |

ENSMUSG00000021499 exon 6 (ORF 0)

|        |                                                                                     |    |
|--------|-------------------------------------------------------------------------------------|----|
| Mus    | GATTCATCAAAAAAGTTTGAAGCGGATCTGACGTTGGAGAAGAACTTTGGCACTTATGGAGGAGAAGCAAAATATCCTGAA   | 80 |
| Rattus | GATTCATCAAAAAAGTTTGAAGCGGAGATGACATTTGGAGAAGAACTTTGGCACTTATGGAGGAGAAGCAAAATGATCTGAA  | 80 |
| Cavia  | GTCTCCATCAAGAAAGTTTGAAGAAAGACCAAGCTTCTGAAGAAAGCA-- --TGAAGGAGAAGAGCAGATGATCTGAA     | 74 |
| Homo   | GACTCCATCAAGAAAGTTTGAAGCGAGAGCTGATGTTGGAGCAAGCAAGGATGCTCATGGAGAGAGAAGCAAGGTGATTCTCA | 80 |

  

|        |                                           |     |
|--------|-------------------------------------------|-----|
| Mus    | ACGCCAGCAAGAGGAGCTCAACAGGCTGATGAACAACACAG | 120 |
| Rattus | ACGACAGCAAGATGAGTCAACAGGCTGATGAACAACACAG  | 120 |
| Cavia  | ACGACAAAAGGAGGAGSTCAACAGGCTGATGAACAACACAG | 114 |
| Homo   | GCGGCAGCAAGSAGSAGATCAGCAGGCTGATGACATAACAG | 120 |

ENSMUSG00000021499\_intron\_5

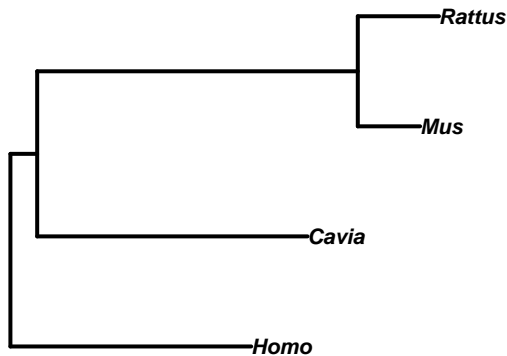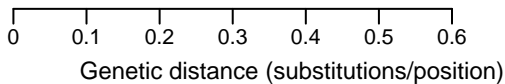

```

Mus      G T G A G C A T G T T A G T G T G T C T T G T G T G T G T C T G T G T G T G T G T G T G T G T A T A C C C A T G C C T T A G G T T A G G T G T G C - - - - - C A G G T A T G G C T 104
Rattus  G T G A G C G G T G C A - - - - - G C G T G T C T G C C A T G T G C A T A C G T G C C A T G T G C T A C C C A T G G C T C G G T T A G G T G T G C C A G G T A C A G G T A T G G C 90
Cavia   G T G A G C C T G T G C T - - - - - G C G T G T C T G C C A T G T G C A T A C G T G C C A T G T G C T A C C C A T G G C T C G G T T A G G T G T G C C A G G T A C A G G T A T G G C 80
Homo    G T G A G G C A C A G C - - - - - T T G T A G C A T T G G A G C T T A G G G T A G G T G T G C C A G T G C A G G T G T A G G T G T A G G T G T A G G T G T A G G T G T A G G T 80

Mus      C A T G T T T C T T G G A C A A G C T G C - - - - - A A T T G T G T C T T - - - A T G A A G A G G T G T A G A G C T A A C C A A T G G T C C C C C T C T C A T G G G T A C C C A A C C C - - - - - 189
Rattus  C A G A T T T C T T G G A C A A G C T G C - - - - - A A T T G G T C T T - - - C T G A A G T G C T G T A G A G G T A A G G A A A G G C C C C C T C T C A T T T G A G C C A A C T G - - - - - 174
Cavia   C A G G T A T C A A G G A G A A C C A G - - - - - A G G T G T G T C T T A T C C T G A A G T G G A G T G A G G T C T G A G C T G G G C C C C C C T A C T T - - - C A A C T C T T C C C C T G A C A 158
Homo    C A A G T C T C A G G A G G A C T G A G C T G T G T A G C T G T G T C T C C C A T G A A G T G G A G T A G A G G T G C C A G A T G G A C C T G T C C C T C A C C C G G C C C A A C T C T C T C C C T G A C 170

Mus      - - - T G C A A G T T C A T C A C C T T A T G A T G G A G G G C A C C A A C C A T G G A G C T T A A G A A A C C G T T G C A - - - - - G G G G C T G G C C T G T G T G A G G T 271
Rattus  - - - T A C A A G T T C A - C A C C T C G T G A T G G A G G G C A C C A G G T C A G T G G A G C T T A A G A A A C C A T T G T A G - - - - - G T G C C A G C T T G A G T T G G G G C T G G C C C T G G T G G G T 275
Cavia   T T T G C A T T T T T C T T C C T T A T G A T G G T - - - - - G G G T G A G C T T G G G G C T G G C T C - G A A T G G G C 216
Homo    C A G T G C A T T T T G C T T G C C T G C T G A T G G T - G G T C A C A G G A C G G T G G G C T T A A G A A C C C T C T G C A G C T A C A G T T G G C A G C T T G A G - T G G C G G C T G G C C C T G T G T G G G A 278

Mus      G G C C T T T C T G C T G A G - G C C T G A G C A G C A G G C A A G C T A G G C A A G G A G A A G G C T T G A A T G A A A G G G T G T A - - G G A A C A C A A T C C T G A C T T T G T A T A T T C T G C C G T C 378
Rattus  G G C C T T T C T G C T G A G - G C C T G A G C A T C A G G C A A G G T A G G A A A G G A G A G G C T T G A A T G A A A G G G T G T G - - G G G A C A C C A T C C T G A C T T G T A T A T T C T G C T A 381
Cavia   A T G C C T T C T G C T G A C A A G C T A G C A G C A G G G A G G A G G C A A G G A G G A A G A G T C C A G G G A G A A R S T S A C T G A S A G C T T C C G G T G C T T G A C C T - - - - - C T G A 320
Homo    A A G T G C T C T G C T G A G G C C T G A G C A G G T G C A A G A C T G G G A A G A G A A A S A C T G - G T C G G C A T G A G G A G A G C C T G T A G T G A C C T C A T C C T C T G A C T C 385

Mus      T T A G 382
Rattus T T A G 385
Cavia  C T A G 324
Homo   C T A G 389

```

ENSMUSG00000048677 intron 11

Description: Two pore calcium channel protein 2 (Tpcn2)

Intron number: 11

Mouse chromosome: 7

Upstream exon length: 101

Downstream exon length: 82

Mouse intron length: 443

Intron alignment length: 742

Total murinae branch length: 0.20397

K\_score: 0.08783

Scaling factor: 0.69557

ENSMUSG00000048677 exon 11 (ORF 0)

|        |                                                                                                                                                                 |    |
|--------|-----------------------------------------------------------------------------------------------------------------------------------------------------------------|----|
| Mus    | A A A T C T C T A C A G A C C T C A C T G T T C C G G C G G C G A C T G G G G G C C C G T G C A G C C T A C G A A G T C C T G G C C T C C A G G G C C G G G C C | 80 |
| Rattus | A A A T C T C T A C A G A C C T C A C T G T T C C G G C G G C G A C T A G G G G C C C G T G C G G C C T A T G A A G T C C T A G C C T T C A G G G A G G G C C   | 80 |
| Cavia  | A A A T C T C T G C A G A C C T C G C T G T T C C G G C G G C C C C T G G G C A C C C G T G C T G C C T A T G A G T C C T A T C C T C C A T G C A G G G C       | 78 |
| Homo   | A A A T C T C T C C A G A C C T G C T G T T C G G A G G G C G C T G G G A A C C C G G G C T G C C T T T G A A G T C C T A T C C T C C A T G C T G G G G A       | 80 |

  

|        |                                           |     |
|--------|-------------------------------------------|-----|
| Mus    | A G C T G G A A C C A C C C C T G A G T T | 101 |
| Rattus | A A A T G G A A C C A C C C T G A G T T   | 101 |
| Cavia  | - - - G G A G C C G C T C C T G A G A C   | 95  |
| Homo   | G G A G G A G C C T T C C C T C A G G C   | 101 |

ENSMUSG00000048677 exon 12 (ORF 1)

|        |                                                                                                                                                                   |    |
|--------|-------------------------------------------------------------------------------------------------------------------------------------------------------------------|----|
| Mus    | A G T T G G G G T G A A T C C T G A G A C C T T C C T G C C A G T G C T T C A G A A A A C C C A G C T G A A C A A A A C C C A C A A A C A A G C C A T T A T G C   | 80 |
| Rattus | A G T C G G G G T A A A T C C C G A G A A C T T C C T G C G A G T G C T T C A G A A A A C C C A G C T G A A C A A A A T C C A C A A A C A A G C C A T C A T A G C | 80 |
| Cavia  | A G C T G G A G T G C G G C C T C A C A C C T T A C T G C A G G T G C T G C A G A A A G T G C A G A T G A G C G G T T C T C A C A A A C A A G G C C A T C A T G C | 80 |
| Homo   | A G T T G G G G T G A A G C C C C A G A A C T T G C T G C A G G T G C T T C A G A A G G T C C A G C T G G A C A G C T C C C A C A A A C A A G G C C A T G A T G C | 80 |

  

|        |     |    |
|--------|-----|----|
| Mus    | A G | 82 |
| Rattus | A G | 82 |
| Cavia  | A G | 82 |
| Homo   | A G | 82 |

ENSMUSG00000048677\_intron\_11

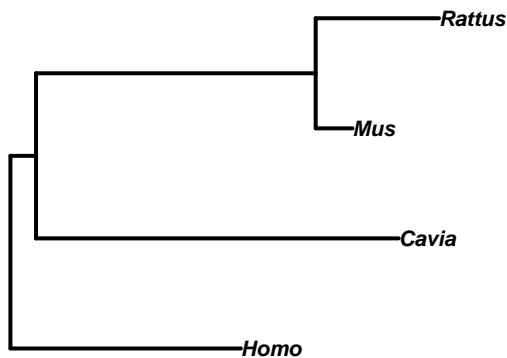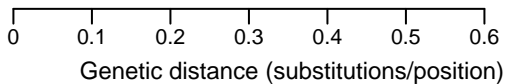





ENSMUSG00000026272 intron 3

Description: Serine--pyruvate aminotransferase, mitochondrial Precursor (Agxt)  
 Intron number: 3  
 Mouse chromosome: 1  
 Upstream exon length: 65  
 Downstream exon length: 101  
 Mouse intron length: 540  
 Intron alignment length: 608  
 Total murinae branch length: 0.14773  
 K\_score: 0.08125  
 Scaling factor: 0.69612

ENSMUSG00000026272 exon 3 (ORF 2)

|        |                                                                      |    |
|--------|----------------------------------------------------------------------|----|
| Mus    | GAGCCCGTGTGCACCAGATGATCAAGAAGCCTGGAGAACATTATACCACTGCAGGAGGTTGGAGGAG  | 65 |
| Rattus | GAGCCCGTGTGCACCAGATGATCAAGAAGCCTGGAGAACATTATACCACTGCAGGAGGTTGGAGGAG  | 65 |
| Cavia  | GAGCCCAATGTGCACGCCATGATCAAGAAGCCTGGAGAAGCTACTACCACTGCAGGAGGTTGGAGGAG | 65 |
| Homo   | GAGCCCGAATGTGCACCGCATGATCAAGGACCCCTGGAGGCTACTACCACTGCAGGAGGTTGGAGGAG | 65 |

ENSMUSG00000026272 exon 4 (ORF 0)

|        |                                                                                    |    |
|--------|------------------------------------------------------------------------------------|----|
| Mus    | GGCCTGGCCCAACACAAAACCGGTATTGCTGTTCTGCTCCACGGGGAGTCAATCCACTGGGGTGGTGCAGCCCTGGATGG   | 80 |
| Rattus | GGCCTGGCCCAACACAAAACCGGTATTGCTGTTCTGCTCCACGGGGAGTCAATCCACTGGGGTGGTGCAGCCCTGGATGG   | 80 |
| Cavia  | GGCTTGGCCCAAGCAACAAGCCAGTCTGCTGTTCTGACCCCAAGGGGGAGTCAATCCACTGGGGTGGTGCAGCCCTGGATGG | 80 |
| Homo   | GGCCTGGCCCAAGCAACAAGCCAGTCTGCTGTTCTTAAACCAAGGGGGAGTCAATCCACTGGGGTGGTGCAGCCCTGGATGG | 80 |

  

|        |                        |     |
|--------|------------------------|-----|
| Mus    | TTTTGGGGAGCTCTGCCAATAG | 101 |
| Rattus | TTTTGGGGAGCTCTGCCACAG  | 101 |
| Cavia  | CTATGGGGAGCTGTGTACACAG | 101 |
| Homo   | CTTCGGGGAACTCTGCCACAAG | 101 |

ENSMUSG00000026272\_intron\_3

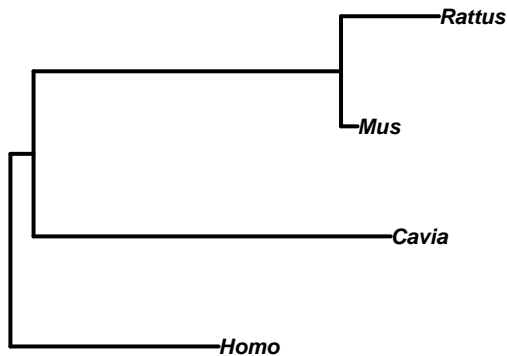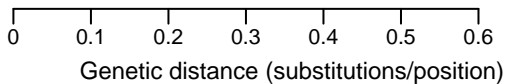



ENSMUSG00000023945 intron 7

Description: High affinity choline transporter 1 (Slc5a7)

Intron number: 7

Mouse chromosome: 17

Upstream exon length: 218

Downstream exon length: 630

Mouse intron length: 1527

Intron alignment length: 2150

Total murinae branch length: 0.24380

K\_score: 0.08861

Scaling factor: 0.69778

ENSMUSG00000023945 exon 7 (ORF 2)

|        |                                                                                     |     |
|--------|-------------------------------------------------------------------------------------|-----|
| Mus    | GATTCTCCCGATCGTTCTGCAGTACCTCTGCCCTGTGTACATTCTCCTTCCTTTGGGCTTGGTGCTGTTTCAAGCTGCTGTCA | 80  |
| Rattus | GATTCTCCCGATCGTTCTGCAGTACCTCTGCCCTGTGTACATTCTCCTTCCTTTGGGCTTGGTGCTGTTTCTGCTGCTGTCA  | 80  |
| Cavia  | GATTCCTCCCGATCGTTCTGCAGTACCTCTGCCCTGTGTACATTCTCCTTCCTTTGGGCTTGGTGCTGTTTCTGCTGCTGTCA | 80  |
| Homo   | GATTTTACC AATTTGTTCTGCAGTATCTCTGCCCTGTGTATATTTCTTTCTTTGGTCTTGGTGCAAGTTTCTGCTGCTGTAA | 80  |
| Mus    | TGTCCTCAGCTGACTCGTCCATCCTGTGGGCGAGTCTATGTTTGCTCGGAATATCTACCAGCTTTCCTTCAGACAAAAA     | 160 |
| Rattus | TGTCCTCGGCTGACTCATCCATCCTATCAGCAAGTCCATGTTTGCTCGGAATATCTACCAGCTTTCCTTCAGACAAAAA     | 160 |
| Cavia  | TGTCCTCGGCGGACTCATCTATCCTGTGGGCGAAGTCCATGTTTGCACGGAAATCTACCAGCTTTCCTTCAGACAAAAA     | 160 |
| Homo   | TGTCATCAGCAAGATTCTTCCATCTTGT CAGCAAGTCCATGTTTGCACGGAAATCTACCAGCTTTCCTTCAGACAAAAA    | 160 |

ENSMUSG00000023945 exon 8 (ORF 0)

|        |                                                                                  |     |
|--------|----------------------------------------------------------------------------------|-----|
| Mus    | GCATCAGACAAAGAAATTTGTGGGTTCATGAGGATCACTGTGCTTGTGTTTGGAGCATCTGCAACAGCCATGGCTTTTGC | 80  |
| Rattus | GCATCAGACAAAGAAATTTGTGGGTTCATGAGGATCACTGTGCTTGTGTTTGGAGCATCTGCAACAGCCATGGCTTTTGC | 80  |
| Cavia  | GCATCAGACAAAGAAATTTGTGGGTTCATGAGGATCACTGTGCTTGTGTTTGGAGCATCTGCAACAGCCATGGCTTTTGC | 80  |
| Homo   | GCTTCGGACAAAGAAATCGTTTGGGTTCATGAGGATCACTGTGCTTGTGTTTGGAGCATCTGCAACAGCCATGGCTTTGC | 80  |
| Mus    | GACGAAGACTGTGTATGGGCTCTGTTACCTCAGCTCTGACCTTGTCTACATCATCATCTTCCACAGCTGCTCTGTGTAC  | 160 |
| Rattus | GACGAAGACTGTGTATGGGCTCTGTTACCTCAGCTCTGACCTTGTCTACATCATCATCTTCCACAGCTGCTCTGTGTAC  | 160 |
| Cavia  | GACGAAGACTGTGTATGGGCTCTGTTACCTCAGCTCTGACCTTGTCTACATCATCATCTTCCACAGCTGCTCTGTGTAC  | 160 |
| Homo   | GACGAAGACTGTGTATGGGCTCTGTTACCTCAGCTCTGACCTTGTCTACATCATCATCTTCCACAGCTGCTCTGTGTAC  | 160 |

ENSMUSG00000023945\_intron\_7

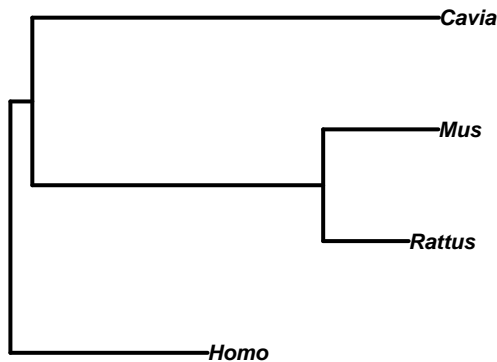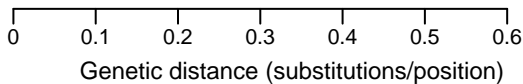



ENSMUSG00000038567 intron 6

Description: 1,25-dihydroxyvitamin D (Cyp24a1)

Intron number: 6

Mouse chromosome: 2

Upstream exon length: 112

Downstream exon length: 146

Mouse intron length: 1327

Intron alignment length: 1903

Total murinae branch length: 0.19803

K\_score: 0.08693

Scaling factor: 0.69847

ENSMUSG00000038567 exon 6 (ORF 0)

|        |               |                    |            |                |                   |              |    |
|--------|---------------|--------------------|------------|----------------|-------------------|--------------|----|
| Mus    | ATGATGAGCACAA | TTTGGGAAGATGATGGT  | GACCCCCCGT | GAGGTTGCACAAGC | GGCCTCAACACCAAAGT | GTGGCAAGCGCA | 80 |
| Rattus | ATGATGAGCACG  | TTTGGGAAGATGATGGT  | GACCCCCCGT | GAGGTTGCACAAGC | GGCCTCAACACCAAAGT | GTGGCAAGCGCA | 80 |
| Cavia  | ATGATGGGTA    | CTTTGGGAAGATGATGGT | CACCCCGT   | GAGGTTGCACAAGC | GGCCTCAACACCAAAGT | GTGGCAAGCGCA | 80 |
| Homo   | ATGATGAGCACG  | TTTGGGAAGATGATGGT  | CACCCCGT   | GAGGTTGCACAAGC | GGCCTCAACACCAAAGT | GTGGCAAGCGCA | 80 |

  

|        |                 |                   |     |
|--------|-----------------|-------------------|-----|
| Mus    | CACGCTGGCCTGGGA | CACCATTTTCAAATCAG | 112 |
| Rattus | TACGCTGGCTTGGGA | CACCATTTTCAAATCAG | 112 |
| Cavia  | CACCCTGGCCTGGGA | CACCATTTTCAAATCAG | 112 |
| Homo   | CACTCTGGCCTGGGA | CACCATTTTCAAATCAG | 112 |

ENSMUSG00000038567 exon 7 (ORF 2)

|        |                    |                     |            |                |                |              |             |      |    |
|--------|--------------------|---------------------|------------|----------------|----------------|--------------|-------------|------|----|
| Mus    | TCAAAGCCCTGCATCGAC | CACCGCTAGAGA        | GATATTG    | CAGCAGCCTGGTGC | GATTTCCTTTGT   | GATATTTATCA  | GCAA        | 80   |    |
| Rattus | TCAAAGCCCTGCATCGAC | CACCGCTAGAGA        | GATATTG    | CAGCAGCCTGGTGC | GATTTCCTTTGT   | GATATTTATCA  | GCAA        | 80   |    |
| Cavia  | TCAAAGTCTTGCTA     | ATTAGAAATTTAGAGAAAT | ATTCT      | CAGCAGCCTGGCAT | GATTTCCTTTGGA  | GATATTTATCA  | GCAAC       | 80   |    |
| Homo   | TCAAAGCCTTGCTA     | TCGACAAACCGG        | TTAGAGAAAT | GATATTCT       | CAGCAGCCTAGTGC | GATTTCCTTTGT | GATATTTATCA | GCAA | 80 |

  

|        |                          |                 |                             |      |     |
|--------|--------------------------|-----------------|-----------------------------|------|-----|
| Mus    | GATCATCTTTTCAAAGAAAGAACT | TGTACGCTGCTGTCA | CCGAGCTCCAGCTGGCTGCAGTGA    | CACG | 146 |
| Rattus | GATCACCTTTTCAAAGAAAGAACT | TGTACGCTGCTGTCA | CCGAGCTCCAGCTGGCTGCAGTGA    | CACG | 146 |
| Cavia  | AATCAGCTTTTCAAAGAAAGAAAT | TGTACGCTGGCAT   | CAAGGATCCAGCTGGTGGCAT       | A    | 146 |
| Homo   | AATCGGCTTTTCAAAGAAAGAAAT | TGTATGCTGCTGTCA | AGAGCTCCAGCTGGCTGGCTGGAAACG |      | 146 |

ENSMUSG00000038567\_intron\_6

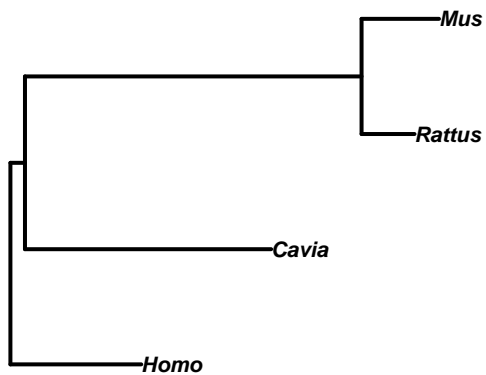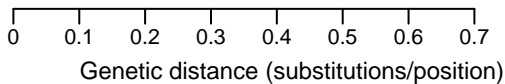



ENSMUSG00000029545 intron 1

Description: Short-chain specific acyl-CoA dehydrogenase, mitochondrial P (Acads)  
 Intron number: 1  
 Mouse chromosome: 5  
 Upstream exon length: 46  
 Downstream exon length: 164  
 Mouse intron length: 1496  
 Intron alignment length: 1828  
 Total murinae branch length: 0.24276  
 K\_score: 0.06899  
 Scaling factor: 0.6996

ENSMUSG00000029545 exon 1 (ORF 0)

```

Mus      -----ATGGCTGGCGGCCCTTGGCTCGCCCGGGGCCCGTGGCCCTCTCCCTAGAG 46
Rattus  ATGGCCATGGCCCGCTGGCGCTTGGCTCGCCCGGGGCCCGTGGCCCTCTCTCCCTAGAG 52
Cavia   CCGGCCATGGCCCGCTGGCGCTTGGCTCGCCCGGGGCCCGTGGCCCTCTCCCTAGAG 52
Homo    -----ATGGCCCGCGGCCCTTGGCTCGCCCGGGGCCCTCGGGCCCTGGCCCTAGAG 46
    
```

ENSMUSG00000029545 exon 2 (ORF 2)

```

Mus      CTCTCGGTGTTCGGGACTGGCGAGCGCTTACACACTGTTTACCAGTCTGTGGAAGCTGCCTGAGACACACCAGATGTTGGCT 80
Rattus  CTCTCCGCGCTCGAGATTGGCGAGATTACACTACTGTTTACCAGTCTGTGGAAGCTGCCTGAGACACACCAGATGTTGGCT 80
Cavia   TTCTGCCGTCTCTGGGACTGGCGAGCGCTTACACACTGTTTACCAGTCTGTGGAAGCTGCCTGAGACACACCAGATGTTGGCT 80
Homo    CTCTCTTGTCTTATGGGCGCTGGCGAGCGCTTACACACTGTTTACCAGTCTGTGGAAGCTGCCTGAGACACACCAGATGTTGGCT 80

Mus      CAGACATGCCGTGACTTTGCCGAGAAAGGAGTTGGTCCCCATTGCGGCCAGCTGGACAGGGGAGCATCTCTTCCCACACAGC 160
Rattus  CAGACATGCCGGGACTTTGGTGAAGGAGCTGGTCCCCATCGCTGGCCAGCTGGACAAGGAACATCTCTTCCCACACATCC 160
Cavia   CAGACCTGTTCGGGACTTTGGTGAAGGAGCTGGTCCCCATCGCGGGCTCAAGCTGGACAGGGGAGCATCTCTTCCCAGG 160
Homo    CAGACATGCCGGGACTTTGCCGAGAAAGGAGTTGTTTCCCCATTGCAAGCCCAAGCTGGATTAAGGAACATCTCTTCCCAG 160
    
```

ENSMUSG00000029545\_intron\_1

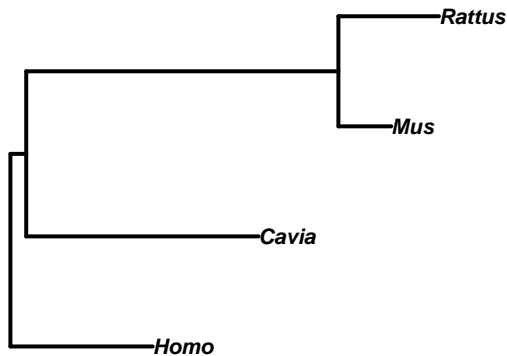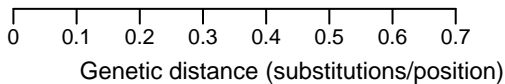







Mus GTAGGCAGTCCCGGCTGCCA...CATCCACAGGTCACACAGGCTCCCATGGG... 61  
Rattus GTAGGCAGTCCCGGCTGCCA...CATCCACAGGTCACACAGGCTCCCATGGG... 65  
Cavia GTAGGCAGTCCCGGCTGCCA...CATCCACAGGTCACACAGGCTCCCATGGG... 45  
Homo GTAGTGTCCAGCTCTGCAGGAGAGCTGCCTCAGCTGCCACATGGCCCTCTTCTGTGCTAGGCTGCCACCAAGCAATGGCAGCACCCCTCACCCTGCTTC 109

Mus ACACAGGGCCAGCCACACAGCAATGTCTGCTGCTGAGAGAGCTGTCA...GGAACCTCTCTCAGCCATGCCGTCCA 138  
Rattus ACACAAGGGAGGCACAGAGCTGCATGTCTGCTGCTGGAAGAAGTGTCA...GGAAGCTTTCTCAGGTTCACTCTG 139  
Cavia TGGAGAAAGGGCAGTGGGACAGACTCAGGCCACCCCAACCAAGGATTTGGCTGCTGACAGAACTCCAACCCAGATGGCTGGTGGGCTCTCTGAGAGGCCACCTCCCA 219  
Homo

Mus GCTCTCCCCG...TTTCTGTTCTGCCGCCACAGACATTCCTGCTAACAAAGATAAA...ATTCTGCCAGAAATGTA 215  
Rattus AAGACTCTTCTGCAGGAAACC...GAACTGTTCTGCCGCCAGAGACCTCTCTGCTAACAAAGATAAA...GTTCTGCCAGAAATAG 228  
Cavia GGGAAAGCCCTCTCTCTCCCGGCTTTCTCAGGCTGCCACAGCTGCCAGAGGCCACTAGCTAGAGCTGGACAGGGGTCTGTTCTATCTTAAACATG 329  
Homo

Mus ACTCTTTTGTGGTAGCTTCTTAGGGGCTCCCTAAAAGSACTCTTCTGAGCTGTGGAACTGGAGCCACAATCTCCG...AAGTCAGCTCTCTTGGGG... 316  
Rattus ACTCTTTTGTGGTAGCTTCTTAGGGGCTCCCTAAAAGSACTCTTCTGAGCTGTGGAACTGGAGCTGTAATCA...CCCAAGTCAGCTCTCTTGGGG... 332  
Cavia CTTCTTTTCTTCTTAAATTTCTAGAGGGTCCCTAAAAGSACTCTTCTGAGCTGTGGAACTGGAGCTGTAATCA...CCCAAGTCAGCTCTCTTGGGG... 178  
Homo CTTCTTTTCTTCTTAAATTTCTAGAGGGTCCCTAAAAGSACTCTTCTGAGCTGTGGAACTGGAGCTGTAATCA...CCCAAGTCAGCTCTCTTGGGG... 329

Mus CTTCTTTTCTTCTTAAATTTCTAGAGGGTCCCTAAAAGSACTCTTCTGAGCTGTGGAACTGGAGCTGTAATCA...CCCAAGTCAGCTCTCTTGGGG... 316  
Rattus CTTCTTTTCTTCTTAAATTTCTAGAGGGTCCCTAAAAGSACTCTTCTGAGCTGTGGAACTGGAGCTGTAATCA...CCCAAGTCAGCTCTCTTGGGG... 332  
Cavia CTTCTTTTCTTCTTAAATTTCTAGAGGGTCCCTAAAAGSACTCTTCTGAGCTGTGGAACTGGAGCTGTAATCA...CCCAAGTCAGCTCTCTTGGGG... 178  
Homo CTTCTTTTCTTCTTAAATTTCTAGAGGGTCCCTAAAAGSACTCTTCTGAGCTGTGGAACTGGAGCTGTAATCA...CCCAAGTCAGCTCTCTTGGGG... 329

Mus GAAGGTCCTTTCACACAGGTCGCCCAAAAACCTGCAGGCTAACAGTATCAGACATGAAGGACCAAGTATGAA...GGCCTTGCCTCTCTCT...CCCCAG 472  
Rattus GAAGGTCCTTTCACACAGGTCGCCCAAAAACCTGCAGGCTAACAGTATCAGACATGAAGGACCAAGTATGAA...GGCCTTGCCTCTCTCT...CCCCAG 482  
Cavia ATTTGAAAGGGCCACAGAGAAAGCCCTATAAAACCTCCAGGTTAACAGGATCCAGACACTTAAGTGTCTCGTACTAATGAGCAGCCCTGTTTGGCTCTGTTTCCAG 353  
Homo GTTTGGCATGGCAAT...GCCAATGAAGCTTTTGGTTAACAAATCCAGAGAGTAACTGATGGGGCAATGGCTCTCTTTTCCAG 647

ENSMUSG00000033105 intron 16

Description: Lanosterol synthase (Lss)  
 Intron number: 16  
 Mouse chromosome: 10  
 Upstream exon length: 97  
 Downstream exon length: 106  
 Mouse intron length: 575  
 Intron alignment length: 745  
 Total murinae branch length: 0.14774  
 K\_score: 0.08418  
 Scaling factor: 0.70173

ENSMUSG00000033105 exon 16 (ORF 0)

```

Mus      TTACTGAGCCTTGAGGAATGCTGATGGCGGGTTTGGCTACCTATGAGAAAGAGCCTGGGGTTACTTTGCTGGAGCTGCTGAA 80
Rattus  TTGTTGAGCATGAGGAATTCGGATGGAGGGTTTGGCTACCTATGAGAACTAAGCCTGGGGTTACTTTGCTGGAGCTGCTGAA 80
Cavia   TTACTGAGCATGAGGAATCCTGATGGAGGGTTTGGCTACCTATGAGAACTAAGCCTGGGGTTACTTTGCTGGAGCTGCTGAA 80
Homo    CTGCTGAACATGAGAAATCCAGATGGAGGGTTTGGCTACCTATGAGAACTAAGCCTGGGGTTACTTTGCTGGAGCTGCTGAA 80

Mus      CCCCTCAGAGGTCTTTG 97
Rattus  CCCCTCAGAGGTCTTTG 97
Cavia   TCCCTCGAGGTCTTTG 97
Homo    CCCCTCGAGGTCTTCG 97
    
```

ENSMUSG00000033105 exon 17 (ORF 2)

```

Mus      GAGACATCATGATTGACTACACGATGTAGAGTGTACCTCCGCTGGTGTGATGCAGGCCACTGAAGCATTTCATGAACTCTC 80
Rattus  GAGACATCATGATTGACTACACGATGTAGAGTGTACCTCCGCTGGTGTGATGCAGGCCACTGAAGCATTTCATGAACTCTC 80
Cavia   GAGACATCATGATTGACTACACGATGTAGAGTGTACCTCCGCTGGTGTGATGCAGGCCACTGAAGTCTTTCCACAAAGAACTC 80
Homo    GGGACATCATGATTGACTACACGATGTAGAGTGTACCTCAGCAGTGTGATGCAGGCCCTTAAAGTATTTCACAAAGGCTTC 80

Mus      CCAGACTACAGGGCAGCAGAGGTCAG 106
Rattus  CCAGACCACAGGGCTACAGAGATCAG 106
Cavia   CCAGACCACAGGGCGGCAGAGATCAA 106
Homo    CCGGAGGCACAGGGCAGCGGAGATCCG 106
    
```

ENSMUSG00000033105\_intron\_16

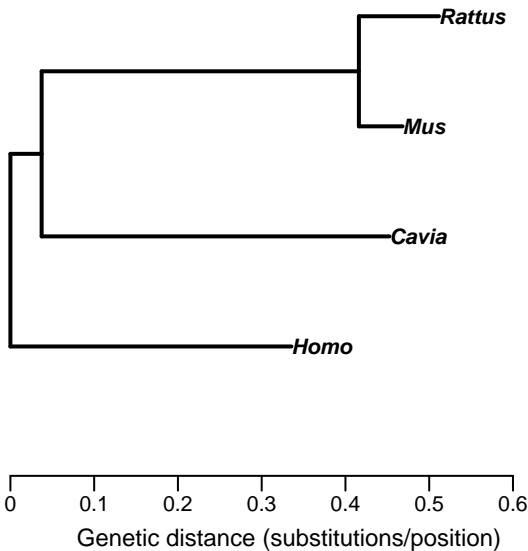



ENSMUSG00000044056 intron 2

Description: EF-hand calcium-binding domain-containing protein 9 (Efcab9)

Intron number: 2

Mouse chromosome: 11

Upstream exon length: 149

Downstream exon length: 177

Mouse intron length: 689

Intron alignment length: 1106

Total murinae branch length: 0.22557

K\_score: 0.05093

Scaling factor: 0.70324

ENSMUSG00000044056 exon 2 (ORF 2)

|        |                                                                                          |    |
|--------|------------------------------------------------------------------------------------------|----|
| Mus    | ATGTGCTCTTCTTTTCATTTTCCTCCAGCACGTTGACTAACCTGAACAAGTCCACAGATCGGGATGATATTTGACCTCCTGGAAC    | 30 |
| Rattus | ATGTGCTTCTTCTTTTCATTTTCCTCCAGCACGTTGACTAACCTGAACAAGTCCACAGATCAAGATGATATTTGACCTCCTGGAAC   | 30 |
| Cavia  | ATGTGCTCTTCTTCTATCACTTCCTCCAGTTACGTTGACTAACCTGAACAAGTCCACAGATCAAGATGCTTCTTTGACATGTTGGAAC | 30 |
| Homo   | ATGTGCTGTTCTATCACTTCCTTTCATCATTTGACTGACTTTGAAAAAGGCACAGATCAACATTTGTTTGGACATGCTGGAAC      | 30 |

  

|        |                                                                        |     |
|--------|------------------------------------------------------------------------|-----|
| Mus    | TGGACAGCTGTAGGAGAGATTTGGTTTTGACCAGTTCTATTGTTGATTTGCATACTGCTGGCACATCAG  | 149 |
| Rattus | TGGACGGCTGTAGGAGAGATTTGGTTTTGACCAGTTCTACCTGTTGGTTTGCATACTGCTGGCACATCAG | 149 |
| Cavia  | TGGCAATGCTGTGGGTGAATTTGGCTTCGAGGAATTTCTACTTGTGGTCTGCATCCTGCTTTCACATCAG | 149 |
| Homo   | TGGAACGCTGTGGGCAGATTCGACTTTGAGAAGTCTACATGCTGGTGTGCATGCTGCTGGGCACCCAG   | 149 |

ENSMUSG00000044056 exon 3 (ORF 0)

|        |                                                                                            |    |
|--------|--------------------------------------------------------------------------------------------|----|
| Mus    | GACCATCTGGAAGACCACTTTATGTACCGCCATTCCCGGCCAGTCTTTTGAAGCTGCTTGATCTGGACGGGGAGATGAATAT         | 30 |
| Rattus | AACCATCTGGAAGATCACTTTATGTACCGCCATTCCCGGCCAGTCTTTTGAAGCTGCTTGATTTGGACGGGGAGTTGAATAT         | 30 |
| Cavia  | AATCATTTTGGAAAGAACATTTATGTACTTGCATTCCCGGCCAGTCTTTTGAAGCTGCTTGACTTAAACGGAGAGCAAGAAAT        | 30 |
| Homo   | AACCATTTTGGAAAGCAGAGTTTATGTATTCGTCATTCCCGGCCCTGTCTTTTGAAGCTGCTTGACTTGAATGAGGGGATCTGAAGAAAT | 30 |

  

|        |                                                                                           |     |
|--------|-------------------------------------------------------------------------------------------|-----|
| Mus    | AGGTGGGGCCAAATTTCCAAAACCTACAGATTTTCTCTTCAATATTTAAAAAGCAGGAACCTCCGACACCTTTTCCATGACTTTG     | 160 |
| Rattus | AGGTGTGACCAATTTCCAAAACCTACAGATTTTCTCTTCAATATTTAAAAAGCAGGAACCTCCGACACCTTTTCCATGATTTTG      | 160 |
| Cavia  | TGGTAAGTCAACCTTCCACTTGTACAGATTTTCTCTTCAATATTTAAAAAGCAGGAACTCCGAACTCAAAGATTTCTTTCCAGATTTTG | 160 |
| Homo   | TGGTGCAAAATAAAGCTTTCGAAATGTACAGATTTTCTCTTCAATATTTAAAAAGCAGGAACCTCAAAGATTTCTTTCCGTTGACTTTG | 160 |

ENSMUSG00000044056\_intron\_2

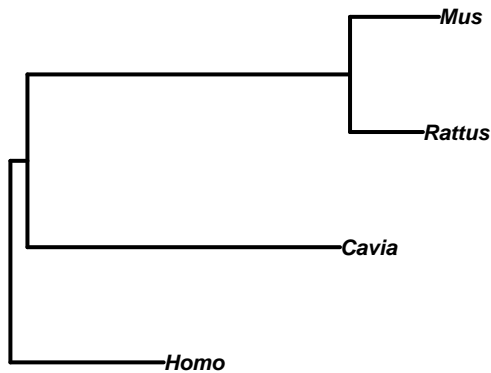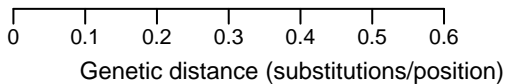



ENSMUSG00000038095 intron 9

Description: Protein strawberry notch homolog 1 (Sbno1)

Intron number: 9

Mouse chromosome: 5

Upstream exon length: 162

Downstream exon length: 136

Mouse intron length: 785

Intron alignment length: 2004

Total murinae branch length: 0.20731

K\_score: 0.02838

Scaling factor: 0.7067

ENSMUSG00000038095 exon 9 (ORF 0)

|        |                                                                                    |    |
|--------|------------------------------------------------------------------------------------|----|
| Mus    | TAAATATGCTAAAGATTTCTTCCAAACACAATGGGAGTGTGAAAAAAGGTGTTATTTTTGCTACCTATTCTTCCCTTATTG  | 80 |
| Rattus | TAAATATGGAAAAGATTTCTTCTTAAACACAATGGGAGTGTGAAAAAAGGTGTTATTTTTGCTACCTATTCTTCCCTTATTG | 80 |
| Cavia  | TAAATATGGAAAAGATTTCTTCCAAACATAAGGGGAGTGTGAAAAAAGGTGTTATTTTTGCTACCTATTCTTCTTCTTATTG | 80 |
| Homo   | TAAATATGGAAAAGATTTCTTCCAAACATAAGGGGAGTGTGAAAAAAGGTGTTATTTTTGCTACCTATTCTTCTTCTTATTG | 80 |

  

|        |                                                                                 |     |
|--------|---------------------------------------------------------------------------------|-----|
| Mus    | GTGAAAGCCAGTCTGGTAAATATAAGACCAGGTTAAAACAGCTTCTACACTGGTGTGGTGACGACTTCGATGGAGTG   | 160 |
| Rattus | GTGAAAGCCAGTCTGGTAAATATAAGACCAGGTTAAAACAGCTTCTGCACTGGTGTGGTGACGACTTCGATGGAGTG   | 160 |
| Cavia  | GGGAAAGCCAGTCTGGTGGCAAAATATAAACTGGTGGAAAACAATTCTGCATTGGTGGGTGACGACTTCGATGGAGTG  | 160 |
| Homo   | GTGAAAGCCAGTCTGGTGGCAAAATATAAACTAGGTTAAAACAATTCTGCATTGGTGGGTGATTGACTTCGATGGAGTG | 160 |

ENSMUSG00000038095 exon 10 (ORF 0)

|        |                                                                                     |    |
|--------|-------------------------------------------------------------------------------------|----|
| Mus    | ATAGTGTTTGATGAATGTCAAAAAGCAAAAAAAGCTTATGTCCTGTTGGTTCTTCAAAGCCAAACCAAGACAGGCTTGGCTGT | 80 |
| Rattus | ATAGTGTTTGATGAATGTCAAAAAGCAAAAAAAGCTTATGTCCTGTTGGTTCTTCAAAGCCAAACCAAGACAGGCTTGGCTGT | 80 |
| Cavia  | ATAGTGTTTGATGAGTGTCAAAAAGCAAAAAAAGCTTATGTCCTGTTGGTTCTTCAAAGCCAAACCAAGACAGGCTTAGCAGT | 80 |
| Homo   | ATAGTGTTTGATGAGTGTCAAAAAGCAAAAAAAGCTTATGTCCTGTTGGTTCTTCAAAGCCAAACCAAGACAGGCTTAGCAGT | 80 |

  

|        |                                                         |     |
|--------|---------------------------------------------------------|-----|
| Mus    | TTTAGAGCTTCAAAACAAATTGCCAAAAGCCAGAGTCTTTATGCCAGTGCCACTG | 136 |
| Rattus | TTTAGAGCTTCAAAACAAATTGCCAAAAGCCAGAGTCTTTATGCCAGTGCCACTG | 136 |
| Cavia  | TTTAGAGCTTCAAAACAAATTGCCAAAAGCCAGAGTCTTTATGCCAGTGCCACTG | 136 |
| Homo   | TTTAGAGCTTCAAAACAAATTGCCAAAAGCCAGAGTCTTTATGCCAGTGCCACTG | 136 |

ENSMUSG00000038095\_intron\_9

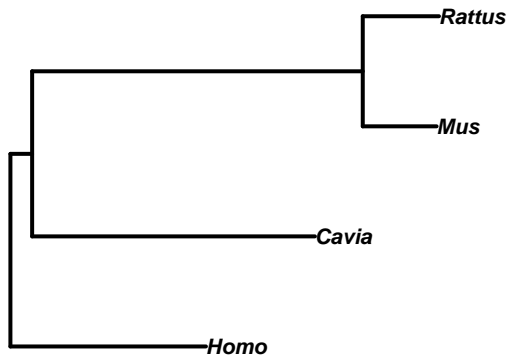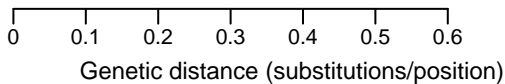

Mus Rattus Cavia Homo  
G T A T C C T T C A G T A G A A A . . . . . C T G T T A G A G T T T A A T G A C A T G A A A A G T T A G A T C T A G T T A G A C C T T T A G A A A A A . . . . . T A G A T T G A G T G G G T T T T T T G 96  
G T A T C C T T C A G T A G A A A . . . . . C T G T T G A G T T G A A T G C A T G A A A A G T T A T A T G T A G A T A G A C C T T T A G A A A A A . . . . . T G A G A A T G A G T . . . . . T T T T T G 88  
G T A T C C T T T A T G C A A A T G T G A T T C T A T T . . . . . T T T T A A T G C A T . . . . . A A A A G T A T A A T A A A A G A G A C T T T G C A A A A G G A G A G C C C T A G G A T T A G A T G A T A G A T T G T T G 104  
G T A T C C T T T A T G C A A A T A T T T T T C T A T T . . . . . T T T T A A G C A G A A . . . . . G A A A A T T A T A A A G G G T A G A C C T T T G C A A A A G G A A G T T A G A T T A A A G A . . . . . G T T G T G 101

Mus Rattus Cavia Homo  
G G G G G G G T C A . . . . . G T T T A A T A G T T T A G A T C C C A G G A T T . . . . . T C A G G A A A C T G G A A A A T A A T T . . . . . G T C A G A . . . . . 134  
T G G T C A T C A G T T T A A T A G T T T A G A T C C C A G G A T T . . . . . T C T G T C C A G G A A A C T G G A A A T C A T T . . . . . C A G C A T C A G A A G T C T G T T T A A G C T T A G T T A C C A C G T C T T T A T C 156  
G C A T G G C A G T T T T A A T T A T . . . . . T A G A T T C C C A G C G C T G G A A A G T T G A T C A G T T T . . . . . G T C A G A G . . . . . A A A T A A C T G A T T 177  
G A T G A A A A C T T T A A T G A T T A C G . . . . . T A G A G T C C A A A G G G A T T G G A A A G T T G A T T C G G T T T T T A C C T G T C A G A T A G G A G A C C A A T G T T T A A T C T C T G C T T 200

Mus Rattus Cavia Homo  
. . . . . G T T G C T G G G T C C T A T A T C C T C T G T T C T T A G T T G G C . . . . . G T T C A T . . . . . 177  
. . . . . G T T G G G G G G T T G C T A C T T C C G C T T T C C C A C T G G G . . . . . T T C A T T C C T G A T G C T G T T C T C T C T C T C T T T T T T T C C T T T T C T A T T T T T T G G 247  
T A G A A A A T G T T A A T A G A T A T A G A G A A T A T G A T A T G T A T T C C C C T T T T A G A G A T T A A C . . . . . 225  
T A G A A A A T G T T A A T A G A T A T A G A G A A T A T G A T A T G T A T T C C C C T T T T A G A G A T T A A C . . . . . 261

Mus Rattus Cavia Homo  
A G C T G G G A C C G A A C C C A G G G C C T T G C G C T T G C T A G G C A A G C G C T C T A C C A C T G A G C C A A A T C C C C A A C C C C G . . . . . G A T G C C T G T T C C C A C G A T G G G T G A G T G C T T G A G C A 213  
. . . . . T G G C T G T T C A T G A T G G G T G A A G C C T T G A C T . . . . . A T G C A T A T T T A C A T A C C A . . . . . G A A T A C C G G A G A A 259  
. . . . . T G C A T A T T T A C A T A C C A . . . . . G A A T A C C G G A G A A 283

Mus Rattus Cavia Homo  
G A C T . . . . . G A G G A A G C A C T A T T C A C T T T G C T T C C T C T T A T T T G C T T A C A G T A T A G C T G C T G C T G C C G A G A A T C C C A T A T T C T T T T T T T T T T T T T T A A G A T T A 317  
G A G C . . . . . A A G G A A G C A C C T T C A C T T A G T G C T T C C C A C T C A C T T G C T T A C A G T A T A G C T T C G C T G C C G A G A A T G . . . . . 357  
A C C A A G T G A A A G G A A . . . . . C A T T G T G A T T T A A A A T G T A T T G T G A C A G T T A T A C A . . . . . 313  
G A C T A A G T G A A A G A A A C T G T T A G A A C T T A G T G C T C C A A A . . . . . C T T G T T C A C A G T A T A C T T . . . . . 353

Mus Rattus Cavia Homo  
T T T A T T T A T A T A T G T A A G T A C A C T G T A G C T G T C T T C A G A C A C C A G A A G A G G G A G T C A G A T C T C G T T A C A G A T G G T T G T G A G C C A C C A T G T G G T T G C T G G G A T T T G A A C T 427  
. . . . . 432  
. . . . . 313  
. . . . . 353

Mus Rattus Cavia Homo  
C C G G A C C T T T G G A A G A G C A G T T G G G T G C T T T A A C C A C T T A G C C A T C T C G C A C C G A A T C C A T A T T C T G A A G T G C T G T T T A C C T T A G T T G C C A G T T G T T T A T G . . . . . 533  
. . . . . T A G T A T C C T G T G C G A A C C A C A C A T C A C A T G T T G A A A T G C T G . . . . . G G T A A T T G G T G C C T G T A C A G T G T A C 384  
. . . . . T T A A C T G T C C T G C A T G A G G A A C A T C A C T T T T G A A A T G C T G . . . . . A T T A A G T T G T T A C C A T T C A T A G C T T C T . . . . . 421

Mus Rattus Cavia Homo  
. . . . . A T T C C T G A A A T C C . . . . . C C G T A G A G C A T A G T C T T G C T C T G T G G A C C T T T C C T A A A T T T G T T A A G A A A G A A A T T . . . . . T T . . . . . G C T G A A G T G A A T G 624  
. . . . . G T C C C T G A A A T T C C C C T G T A G A C A T A G T C T T G C C T C A G T G G A T C T T T C C T G C A T C T T T A A G A A A G A A A G T T C C G A . . . . . G C T G A A G T G A A T A 570  
T G G T A T A C A G A T T C A T T T T T C A G C A T A A T C T G T G T G A C C G C T C T T G C T A T A G A A A A C C C A T T G C T G C A T C C T A G T T G S A A A T T A A A T G C C T G C T A A G C T A A A T A 494  
. . . . . A C T T T T A C A A G T . . . . . T A C C A G A T A A C A C T C T T G C T C A G A G G T T C C T T T T C T C T T T A A T T A G A G C A A A T . . . . . G C T G G T T A A A T T 508

Mus Rattus Cavia Homo  
C . . . . . C A C C T T G A G G A A T G T C T C A G A A T T T C A G T T T A A G G G A A A G G . . . . . A A G A G A G A C A A G G G A G . . . . . A G A T G C T T C A T C T A T G T A T G G A A T C T T A A G A . . . . . C C C T T G T A 724  
C . . . . . C A G A T T G A C T G A A T G C C T G A G A A T T T G A G T A T A G G G A A A G G . . . . . A T T A G A G A C A G S T A G . . . . . A G A G G C T T C A T T A T G A T G G A A T C T T A A G A . . . . . G C T C T G T A 669  
C G T A C A G T T A C T G G G C C T G A A A G G G G G G G G A G A G G G T T G C T G T G G A G A G A C C T G G A T G G C T G T G A T C C G G T A . . . . . A A G A A G A G G C C C T T T G 589  
C . . . . . C A A A T T C A G T G A A T G C T T T G A G G C T A G A C A G G A G G A G C A T G T A A C T G G G A A A G G G C C . . . . . A T A G G A C T T C C T T T G T A T T T C A G T C A T G A A A T A G C C A A T C A G A 613

Mus Rattus Cavia Homo  
G T T G C T A T T C T A T A A A T C A C A C T C T G C C C . . . . . T G T G A T A T G T T C C T T A G C T C . . . . . T T C C T T C A G 785  
G A C T C T G T T C A A A A A C C A C A G C C C T G A A T A G A T A G C T T C T G C C C . . . . . T G T C T A T A T T C C T A G C T C . . . . . G T C C T T A C A G 748  
A A T C T T G G G G A G T A A A T G T T A A C T C T T C T A A A G A A C T A T A G A T G T T A G G A A . . . . . T G T A G C A T A T T C C T T A A C T A C T C C T T A C A G 686  
A G C C T A G G G A A A T A A A G T T A A C T C T T C T T G A A A G A C T G A G A T T C T A C T T A A T A C T A A T G T G A T A C A T T C C T T A A C T C A T T C C A T T T A G 706



ENSMUSG00000027217 intron 6

Description: Tetraspanin-18 (Tspan18)

Intron number: 6

Mouse chromosome: 2

Upstream exon length: 84

Downstream exon length: 48

Mouse intron length: 1277

Intron alignment length: 2508

Total murinae branch length: 0.19833

K\_score: 0.06426

Scaling factor: 0.70827

ENSMUSG00000027217 exon 6 (ORF 0)

|        |                                                                                       |    |
|--------|---------------------------------------------------------------------------------------|----|
| Mus    | GGCTGTTATACAGTGGATCCTCAACACCTTCGAAACCTATGTCTACCTGGCCGGAGCCCTTTGCCATTGGAAGTACTGGGCTAT  | 80 |
| Rattus | GGCTGTTACACTGGTATCCTCAACACCTTCGAAACCTATGTCTACCTGGCCGGAGCCCTTTGCCATTGGGGTGGCTGGGCTAT   | 80 |
| Cavia  | GGCTGTTACACGGTGGTATCCTCAACACCTTCGAAACCTATGTCTACCTGGCCGGAGCCCTTTGCCATTGGGGTGGCTGGGCTAT | 80 |
| Homo   | GGCTGTTACACGGTGGTATCCTCAACACCTTCGAAACCTATGTCTACCTGGCCGGAGCCCTTTGCCATTGGGGTGGCTGGGCTAT | 80 |

  

|        |      |    |
|--------|------|----|
| Mus    | TGAG | 84 |
| Rattus | TGAG | 84 |
| Cavia  | CGAG | 84 |
| Homo   | CGAG | 84 |

ENSMUSG00000027217 exon 7 (ORF 0)

|        |                                                  |    |
|--------|--------------------------------------------------|----|
| Mus    | CTCTTCCTCATGGTCTTTGCCATGTGCCTCTTCCGGGGCATCCAGTAG | 48 |
| Rattus | CTCTTCCTCATGGTCTTTGCCATGTGCCTCTTCCGGGGCATCCAGTAG | 48 |
| Cavia  | CTTTTGTTCATGATCTTGGCCATGTGCCTCTTCCGGGGCATCCAGTAG | 48 |
| Homo   | CTTTTTCGCATGATCTTTGCCATGTGCCTCTTCCGGGGCATCCAGTAG | 48 |

ENSMUSG00000027217\_intron\_6

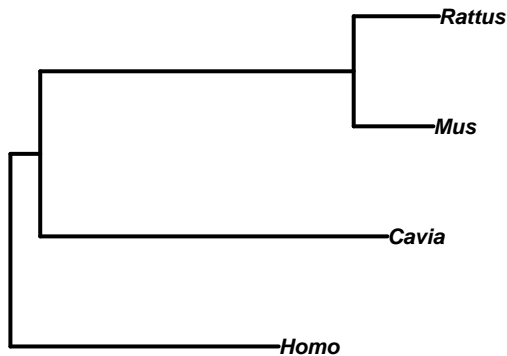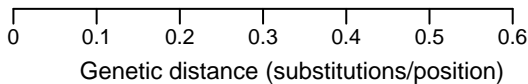



ENSMUSG00000028356 intron 1

Description: Protein AMBP Precursor (Ambp)

Intron number: 1

Mouse chromosome: 4

Upstream exon length: 114

Downstream exon length: 143

Mouse intron length: 1215

Intron alignment length: 1801

Total murinae branch length: 0.14975

K\_score: 0.07321

Scaling factor: 0.71127

ENSMUSG00000028356 exon 1 (ORF 0)

|        |                                                                                      |    |
|--------|--------------------------------------------------------------------------------------|----|
| Mus    | ATGCAGGGTCTCAGGAAACCCCTGTTCTCTGCTGCTGACTGCCTGCCTGCCTTCGAGGGCTGACCCCTGGTCAACACTGCCAG  | 79 |
| Rattus | ATGCAGGGTCTCAGGAGCCCTGTTCTTTGTTGCTGACTGCCTGCCTGCCTTCGAGGGCTGACCAATGTGCCAACACTGCCAG   | 79 |
| Cavia  | ATGTGGGGCGCTCAGGCCCTGCTGTTGCTGCTGGCACTGCCTGCCTGCCTTCGAGGGCTGACCAATGTGCTGACGCTGCCAG   | 80 |
| Homo   | ATGAGGAGCTCTCGGGGCCCTGCTCTTGTGCTGAGGCTGCCTGCCTGCCTGGGGTGAAGGCTCGCCCTGTGCCAACGCCGCCGA | 80 |

  

|        |                                          |     |
|--------|------------------------------------------|-----|
| Mus    | --ATATCCAGGTTCAAGGAGAACTTCAAGTGAAGTCCCGG | 114 |
| Rattus | --ATATCCAGGTTCAAGGAGAACTTCAATGAGGCCCGG   | 114 |
| Cavia  | CGACATCCAAGTCAAGGAGAACTTTCAGCAGTCCCGG    | 117 |
| Homo   | CAACATCCAAGTCAAGGAGAACTTCAATATCTCTCGG    | 117 |

ENSMUSG00000028356 exon 2 (ORF 0)

|        |                                                                                   |    |
|--------|-----------------------------------------------------------------------------------|----|
| Mus    | ATCTATGGAAATGGTACAACCTGGCGGTGGGATCCACCTGCCCGTGGCTGAGCCGCAATTAAGGACAAGATGAGCGTGA   | 80 |
| Rattus | ATCTATGGAAATGGTACAACCTGGCGGTGGGATCCACCTGCCCGTGGCTGAGCCGCAATTAAGGACAAGATGAGCGTGA   | 80 |
| Cavia  | ATGTATGGGAAAGTGGTACAGCCTGGCTATCGGCTCCACCTGTTCCCTGGCTGAAGAGGATCAAGGACAGGCTGAGCGTGA | 80 |
| Homo   | ATCTATGGGAAAGTGGTACAACCTGGCAATCGGTTCCACCTGCCCGTGGCTGAAGAGGATCAATGGACAAGATGACAGTGA | 80 |

  

|        |                                                               |     |
|--------|---------------------------------------------------------------|-----|
| Mus    | CACGCTGGTGTGCAGGAGGGGGCCACAGAAACAGAGATCAGCATGACCAGTACTCGATGGG | 143 |
| Rattus | CACGCTGGTGTGCAGGAGGGGGCCACAGAAACAGAGATCAGCATGACCAGTACTCAATGGG | 143 |
| Cavia  | CACCATGGTGTGCGGCAAGGGGGCCACAGAGGCGAGATCAGCATGACCAGTACTCAATGGG | 143 |
| Homo   | CACGCTGGTGTGCGGCAAGGGGGCTACAGAGGCGGAGATCAGCATGACCAGTACTCGTGGG | 143 |

ENSMUSG00000028356\_intron\_1

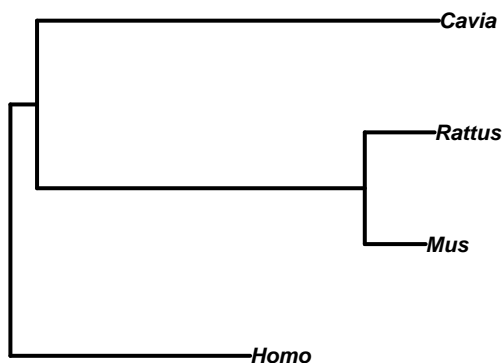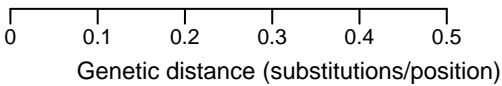

Mus 108  
Rattus 101  
Cavia 82  
Homo 88

Mus 211  
Rattus 204  
Cavia 177  
Homo 172

Mus 290  
Rattus 286  
Cavia 273  
Homo 279

Mus 290  
Rattus 383  
Cavia 379  
Homo 379

Mus 339  
Rattus 6335  
Cavia 421  
Homo 489

Mus 444  
Rattus 439  
Cavia 531  
Homo 595

Mus 545  
Rattus 530  
Cavia 589  
Homo 616

Mus 655  
Rattus 554  
Cavia 614  
Homo 640

Mus 751  
Rattus 649  
Cavia 707  
Homo 746

Mus 805  
Rattus 703  
Cavia 788  
Homo 856

Mus 867  
Rattus 784  
Cavia 855  
Homo 968

Mus 985  
Rattus 891  
Cavia 955  
Homo 1056

Mus 1096  
Rattus 985  
Cavia 1048  
Homo 1151

Mus 1113  
Rattus 1002  
Cavia 1158  
Homo 1208

Mus 1113  
Rattus 1002  
Cavia 1268  
Homo 1208

Mus 1183  
Rattus 1072  
Cavia 1348  
Homo 1311

Mus 1215  
Rattus 1109  
Cavia 1389  
Homo 1352





ENSMUSG00000003235 intron 14

Description: Translation initiation factor eIF-2B subunit epsilon (Eif2b5)

Intron number: 14

Mouse chromosome: 16

Upstream exon length: 126

Downstream exon length: 111

Mouse intron length: 555

Intron alignment length: 622

Total murinae branch length: 0.20942

K\_score: 0.08515

Scaling factor: 0.7128

ENSMUSG00000003235 exon 14 (ORF 0)

|        |                                                                                    |    |
|--------|------------------------------------------------------------------------------------|----|
| Mus    | CTGCTCAAAGCCTGGAGCCCTGTTTTAAAGGAACTACATAAAAGCGTGCAGCTGACCACTTGGAAGCATTGGCAGCCATTGA | 80 |
| Rattus | CTGCTCAAAGCCTGGAGCCCTGTTTTTCGGAACTACATAAAAGCGTGCAGCTGACCACTTGGAAGCATTGGCAGCCATTGA  | 80 |
| Cavia  | CTGCTCAAAGCCTGGAGCCCTGTTTTTAGGAACTATGTAAAGCGTGCAGCTGACCACTTGGAAGCATTGGCAGCCATTGA   | 80 |
| Homo   | CTGCTCAAAGCCTGGAGCCCTGTTTTTAGGAACTACATAAAAGCGTGCAGCTGACCACTTGGAAGCATTGGCAGCCATTGA  | 80 |

  

|        |                                                 |     |
|--------|-------------------------------------------------|-----|
| Mus    | GGACTTCTTCTTGGAAACATGAAACTCTCGTTACTTCCATGGCCAAG | 126 |
| Rattus | GGACTTCTTCTTGGAAACATGAAACTCTTGTTCCTTCCTGGCCAAG  | 126 |
| Cavia  | AGACTTCTTCTTGGAGCATGAAAGCGCTCGGAACCTCCATGGCCAAG | 126 |
| Homo   | GGACTTCTTCTTGAAGCATGAAAGCTCTTGGTATTTCCATGGCCAAG | 126 |

ENSMUSG00000003235 exon 15 (ORF 0)

|        |                                                                                  |    |
|--------|----------------------------------------------------------------------------------|----|
| Mus    | GTCCTGATGGCTTCTACCAAGCTGGAGATCTTGGCTGAGGAAACAATCTTGAGCTGGTTCAGCCAAAGAGACACAACTGA | 80 |
| Rattus | GTCCTGATGGCTTCTACCAAGCTGGAGATCTTGGCTGAGGAAACAATCTTGAGCTGGTTCAGCCAAAGAGACATAACTGA | 80 |
| Cavia  | GTGCTGATGGCTTCTACCAAGCTGGAGATCTGGCTGAGGAAACAATCTTGAGCTGGTTCAGCCAAAGAGACATAACTGA  | 80 |
| Homo   | GTACTGATGGCTTCTACCAAGCTGGAGATCTGGCTGAGGAAACAATCTTGAGCTGGTTCAGCCAAAGAGATTAACACTGA | 80 |

  

|        |                                 |     |
|--------|---------------------------------|-----|
| Mus    | CGAAGGCCAGCAGTTACGCAAGAATCAACAG | 111 |
| Rattus | CAAAGGCCAGCAGTTACGTAAGAATCAACAG | 111 |
| Cavia  | CAGAGGCCAGCAGCTCCCAAGAATCAACAG  | 111 |
| Homo   | CAAAGGCCAGCAGTTCCGCAAGAATCAACAG | 111 |

ENSMUSG00000003235\_intron\_14

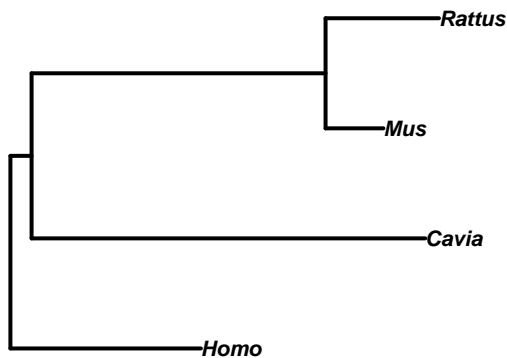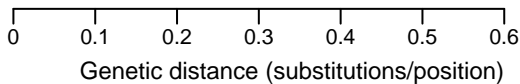





ENSMUSG00000036244 intron 8

Description: TBC1 domain family, member 21 (Tbc1d21)

Intron number: 8

Mouse chromosome: 9

Upstream exon length: 101

Downstream exon length: 117

Mouse intron length: 727

Intron alignment length: 1059

Total murinae branch length: 0.15875

K\_score: 0.07153

Scaling factor: 0.71304

ENSMUSG00000036244 exon 8 (ORF 2)

|        |                                                                                  |    |
|--------|----------------------------------------------------------------------------------|----|
| Mus    | AAGGGAAGGGCTCAGGGGCTGTGCAGTCCCTCTTCCGCTGGTTCTGCCTTTGCTTCCAGGCTGCCTTCAAACCTTCGAT  | 80 |
| Rattus | AAGGAAGGGCTCAGGAGCTGTGCAGTCCCTCTTCCGATGGTTCTGCCTTTGCTTCCAGGCTGCCTTCAAATCCTTCGAT  | 80 |
| Cavia  | AAGGGAAGGGCTCAGGGGCTGTGCAGTCCCTCTTCCGCTGGTTCTGCCTTTGCTTCCAGGCTGCCTTCAAACCTTCGAT  | 80 |
| Homo   | AAGGGAAGGGCTCAGGGGCTGTGCAGTCCCTCTTCCGCTGGTTCTGCCTTTGCTTCCAGGCTGCCTTCAAATCCTTCGAT | 80 |

  

|        |                      |     |
|--------|----------------------|-----|
| Mus    | GATGTCTGGAGGCTCTGGAG | 101 |
| Rattus | GATGTCTGGAGGCTCTGGAG | 101 |
| Cavia  | GATGTCTGGAGGCTCTGGAG | 101 |
| Homo   | GATGTCTGGAGGCTCTGGAG | 101 |

ENSMUSG00000036244 exon 9 (ORF 0)

|        |                                                                                    |    |
|--------|------------------------------------------------------------------------------------|----|
| Mus    | GTCCTGCTGACGGGGAAGCCCTGCAGAAACTTCCAGGTGCTGGTGGCCTACAGCATGCTACAGATGGTGCGCAGAGCAGGC  | 80 |
| Rattus | GTCCTGCTGACAGGGGAAGCCCTGCAGGAACCTTCCAGGTGCTGGTGGCCTACAGCATGCTACAGATGGTGCGGGAGCAGGC | 80 |
| Cavia  | GTCCTGCTGACGGGGAAGCCCTGCAGGAACCTTCCAGGTGCTGGTGGCCTACAGCATGCTACAGATGGTGCAGAGCAGGC   | 80 |
| Homo   | GTTCTGCTGACGGGGAAGCCCTGCAGGAACCTTCCAGGTGCTGGTGGCCTACAGCATGCTACAGATGGTGCGGGAGCAGGC  | 80 |

  

|        |                                       |     |
|--------|---------------------------------------|-----|
| Mus    | GCTTCTGGAGTGTATGAGCGGTGACGCCATTCTCATG | 117 |
| Rattus | GCTGCTGGAGTGTATGAGCGGTGACGCCATTCTCATG | 117 |
| Cavia  | ACTGCTGGAGAGCATGAGTATGATGCCATTCTCTG   | 117 |
| Homo   | GCTGCAAGGAAGCATGAGCGGGGATGACATCTCTG   | 117 |

ENSMUSG00000036244\_intron\_8

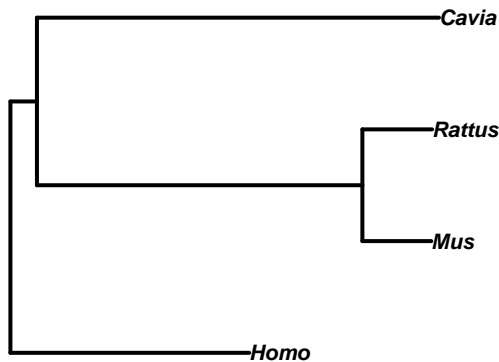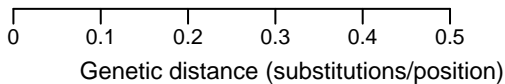



ENSMUSG00000034617 intron 5

Description: 5-methyltetrahydrofolate-homocysteine methyltransferase redu (Mtrr)  
 Intron number: 5  
 Mouse chromosome: 13  
 Upstream exon length: 123  
 Downstream exon length: 154  
 Mouse intron length: 1354  
 Intron alignment length: 2767  
 Total murinae branch length: 0.20088  
 K\_score: 0.07083  
 Scaling factor: 0.71361

ENSMUSG00000034617 exon 5 (ORF 0)

|        |                                                                                       |    |
|--------|---------------------------------------------------------------------------------------|----|
| Mus    | GAGGAAAACCAAGCATCTGTGCCTTCA--GGGGATCCAACTTTTCAAGTTCCAAATTTCAAAGGCAATTCGGCTGACTAC      | 77 |
| Rattus | GATTGAAAACCAAGCATCTGTGCCACCATTCACCTCGATCCAAATTTTCAAGTTCCAAATTTCAAAGGCTTGTTCAGCTGACTAC | 80 |
| Cavia  | GAGCAAGGTCAGCATCTGTGACTTTCA--GGGGATCCAACTTTTCAAGTTCCAAATTTCAAAGGCGTTTCAGCTTACTG       | 80 |
| Homo   | GAGGAAAAGCCAAGTATCTGTGACTTTCA--GCAAGATCCAACTTTTCAAGTTCCAAATTTCAAAGGCAAGTTCAACTTACTAC  | 77 |

  

|        |                                                |     |
|--------|------------------------------------------------|-----|
| Mus    | AAATGATGCCGTAAAGAGCACTCTGCTGTTGGAAGTGGACATTTCA | 123 |
| Rattus | AAATGATGCCATAAAGAGCACTCTGCTGTTGGAATGGACATTTCA  | 126 |
| Cavia  | GAGCGATGCCATCAAACCACTCTGCTGTTGGAAGTGGACATTTCT  | 126 |
| Homo   | GAATGATGCCATAAAAACCACTCTGCTGTTAGAATGGACATTTCA  | 123 |

ENSMUSG00000034617 exon 6 (ORF 0)

|        |                                                                                   |    |
|--------|-----------------------------------------------------------------------------------|----|
| Mus    | AAAATAGAGTTTTCCGATCAACCTGGAGACTCCTTCAATGTGACCTGTCCAAACAGTGATCGTGAGGTAGAAGAAGCTGCT | 80 |
| Rattus | AAAGTAGAGTTTTCCGATCAACCTGGAGATTCCCTTCAATGTGATCTGTCCAAACAGTGTCTGAGGTAGAAGAAGCTGCT  | 80 |
| Cavia  | AAAACAGATTTCCTCCATCAGCCGGCGATGCCTTCAATGTGATCTGTCCAAACAGGATCTAGAGGTGCAAGCCCTACT    | 80 |
| Homo   | AATACAGACTTTTCCATCAGCCCTGGAGATGCCTTCAAGCGTGATCTGCCTAACAGTGATCTGAGGTACAAAGCCTACT   | 80 |

  

|        |                                                                               |     |
|--------|-------------------------------------------------------------------------------|-----|
| Mus    | CCAAAGGCTGCAGCTGGCTGATAAACGAGCTCACCCCTCTCATCTTGAAAATTAAAGCGGACACTAAGAAGAAAAG  | 154 |
| Rattus | GCAAAGGCTGCAGCTGGCTGATAAACAGCAACCCGGCTCATCTTGAAAATTAAAGTGGACACCAAGAAGAAAAG    | 154 |
| Cavia  | CCAGAGACTGCAGCTGGCTGAGAGGAGGAGACCAAGAGCTCTCTTGGAGGTCAAGGGGACACCAAGAAGAAAAG    | 154 |
| Homo   | CCAAAGACTGCAGCTTGAAAGATAAAAAGAGAACAAGTGCCTCTTTTGAAAATTAAAGGCAAGACAAAGAAGAAAAG | 154 |

ENSMUSG00000034617\_intron\_5

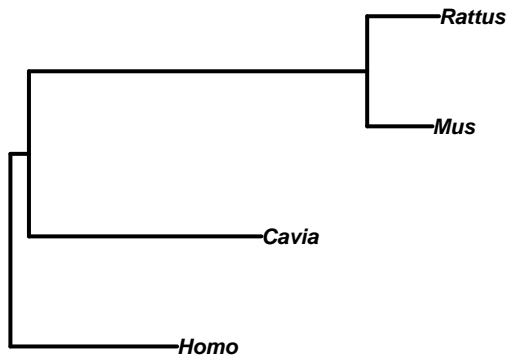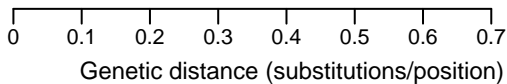



ENSMUSG00000042115 intron 3

Description: Kelch domain-containing protein 8A (Klhdc8a)

Intron number: 3

Mouse chromosome: 1

Upstream exon length: 216

Downstream exon length: 102

Mouse intron length: 573

Intron alignment length: 668

Total murinae branch length: 0.12898

K\_score: 0.08447

Scaling factor: 0.71475

ENSMUSG00000042115 exon 3 (ORF 2)

|        |                     |                     |                         |                       |        |    |
|--------|---------------------|---------------------|-------------------------|-----------------------|--------|----|
| Mus    | CGGTCCTGGACCAAGTTCC | CCCAACATTCCCTGTAAAC | CGGGCTTTCTCCAGCTTTT     | GTGACCCCTGGACAACCACTT | ATACAG | 80 |
| Rattus | CGGTCCTGGACCAAGTTCC | CCCAACATTCCCTGTAAAG | CGGGCTTTCTCCAGCTTTT     | GTGACCCCTGGACAACCACTT | GTACAG | 80 |
| Cavia  | CGGTCCTGGACCAAGTTT  | CCCAACATTCCTT       | CGAAGCGGGCTTTCTCCAGCTTT | GTGACCCCTGGACAATCACTT | GTACAG | 80 |
| Homo   | CGGTCCTGGACCAAGTTT  | CCCAACATTCCCTA      | TAAAGCGGGCTTTCTCCAGCTTT | GTGACCCCTGGACAACCACTT | GTACAG | 80 |

  

|        |                |          |                         |                    |                   |     |
|--------|----------------|----------|-------------------------|--------------------|-------------------|-----|
| Mus    | CCTAGGAGGCCTGC | CCAGGGCC | CGTCTGTACCGGCAGCCAAAGTT | CCTCCGGACAATGGATGT | GTTTCGACATGGAACAG | 160 |
| Rattus | CCTAGGAGGCCTGC | CCAGGGCC | CGTCTGTACCGGCAGCCAAAGTT | CCTCCGGACAATGGATGT | GTTTCGACATGGAACAG | 160 |
| Cavia  | CCTAGGAGGCCTGC | CCAGGGCC | CGTCTGTACCGGCAGCCAAAGTT | CCTCCGGACAATGGATGT | GTTTCGACATGGAACAG | 160 |
| Homo   | CCTAGGAGGCCTGC | CCAGGGCC | CGTCTGTACCGGCAGCCAAAGTT | CCTCCGGACAATGGATGT | GTTTCGACATGGAACAG | 160 |

ENSMUSG00000042115 exon 4 (ORF 2)

|        |                       |                    |                    |                  |        |    |
|--------|-----------------------|--------------------|--------------------|------------------|--------|----|
| Mus    | GGGGATGGCTGAAGATGGAAC | CTCATTCTTCCTCAAGAA | AGCGCGGGCAGACTTTGT | GGCTGGTGGTCTGAGT | GGAAGG | 80 |
| Rattus | GGGGATGGCTGAAGATGGAAC | CTCATTCTTCCTCAAGAA | AGCGCGGGCAGACTTTGT | GGCTGGTGGTCTGAGT | GGAAGG | 80 |
| Cavia  | GGGGATGGCTGAAGATGGAAC | CTCATTCTTCCTCAAGAA | AGCGCGGGCAGACTTTGT | GGCTGGTGGTCTGAGT | GGAAGG | 80 |
| Homo   | GGGGATGGCTGAAGATGGAAC | CTCATTCTTCCTCAAGAA | AGCGCGGGCAGACTTTGT | GGCTGGTGGTCTGAGT | GGAAGG | 80 |

  

|        |                   |       |     |
|--------|-------------------|-------|-----|
| Mus    | GTCATAGTGGCTGGGGC | CCTTG | 102 |
| Rattus | GTCATAGTGGCTGGGGC | CCTTG | 102 |
| Cavia  | GTCATAGTGGCTGGGGC | CCTTG | 102 |
| Homo   | GTCATAGTGGCTGGGGC | CCTTG | 102 |

ENSMUSG00000042115\_intron\_3

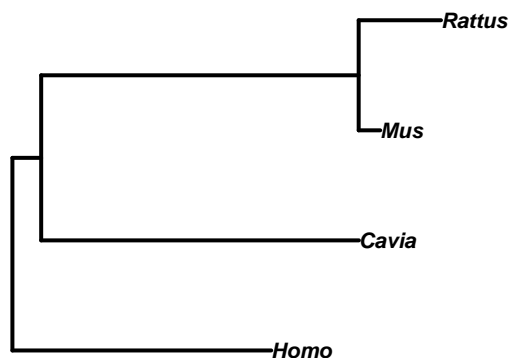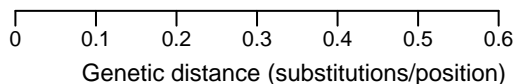

Mus 72  
Rattus 72  
Cavia 107  
Homo 84

Mus 175  
Rattus 171  
Cavia 210  
Homo 190

Mus 262  
Rattus 263  
Cavia 302  
Homo 293

Mus 355  
Rattus 374  
Cavia 374  
Homo 382

Mus 462  
Rattus 481  
Cavia 483  
Homo 485

Mus 565  
Rattus 589  
Cavia 580  
Homo 572

Mus 573  
Rattus 597  
Cavia 580  
Homo 597

ENSMUSG00000041660 intron 1

Description: Gamma-butyrobetaine dioxygenase (Bbox1)

Intron number: 1

Mouse chromosome: 2

Upstream exon length: 219

Downstream exon length: 115

Mouse intron length: 1557

Intron alignment length: 2500

Total murinae branch length: 0.20839

K\_score: 0.03032

Scaling factor: 0.7153

ENSMUSG00000041660 exon 1 (ORF 0)

|        |                                                                                      |     |
|--------|--------------------------------------------------------------------------------------|-----|
| Mus    | TTGGCACGATGGGGCAGAGTCCCTCTACCCAGCAGTATGGCTGAGAGACAACCTGTCAAGTGTTCAGACTGCTACCTACATT   | 30  |
| Rattus | TTGGCACGATGGGGCAGAGTCCCTCTACCCAGCAGTATGGCTGAGAGACAACCTGTCAAGTGTTCAGACTGCTACCTACATT   | 30  |
| Cavia  | CTGGGATGACGATGGAGAGAGTCCCTGTACCCAGCCGTGTGGCTGAGAGACAACCTGTCAAGTGTTCAGACTGCTACCTGGATT | 30  |
| Homo   | CTGGTATGATGAGGAAAGAGTCTCTCTACCCAGCCGTGTGGCTGAGAGACAACCTGTCAAGTGTTCAGATTGCTACCTGGATT  | 30  |
| Mus    | CTGCAAAAGCTCGGAAACTTCTCCTGGAAGCTCTTGATGTAACATTAGAATCGATGATTTGACATTTGACCGGAAAAAG      | 160 |
| Rattus | CTGCAAAAGCTCGGAAACTTCTCCTGGAAGCTCTTGATGTAACATTAGAATCGATGATTTGACATTTGACCGGAAAAAG      | 160 |
| Cavia  | CTGCCAAAGCTCGGAAACTTCTCCTGGAAGCTCTTGATGTAACATTAGAATCGATGATTTGACATTTGACCGGAAAAAG      | 160 |
| Homo   | CTGCAAAAGCTCGGAAACTTCTAGTGAAGCTCTTGATGTAACATTAGAATCGATGATTTGACATTTGACCGGAAAAAG       | 160 |

ENSMUSG00000041660 exon 2 (ORF 0)

|        |                                                                                   |     |
|--------|-----------------------------------------------------------------------------------|-----|
| Mus    | GTTTATATCACATGGCCCAATGACCATTACAGTGAATTCGAAGCTAATCGGCTGAAGAAAAAGATGCTTTTCTCAACAGGC | 30  |
| Rattus | GTTTATATCACATGGCCCAATGACCATTACAGTGAATTCGAAGCTAATCGGCTGAAGAAAAAGATGCTTTTCTCAACAGGC | 30  |
| Cavia  | GTTTATATCACATGGCCCAATGACCATTACAGTGAATTCGAAGCTAATCGGCTGAAGAAAAAGATGCTTTTCTCAACAGGC | 30  |
| Homo   | GTTTATATCACATGGCCCAATGACCATTACAGTGAATTCGAAGCTAATCGGCTGAAGAAAAAGATGCTTTTCTCAACAGGC | 30  |
| Mus    | CAGAGCAAAGGCTCCAAAGGAGAATTGTTTTTACCAG                                             | 115 |
| Rattus | CAGAGCAAAGGCTCCAAAGGAGAATTGTTTTTACCAG                                             | 115 |
| Cavia  | CAGAGCAAAGGCTCCAAAGGAGAATTGTTTTTACCAG                                             | 115 |
| Homo   | CAGAGCAAAGGCTCCAAAGGAGAATTGTTTTTACCAG                                             | 115 |

ENSMUSG00000041660\_intron\_1

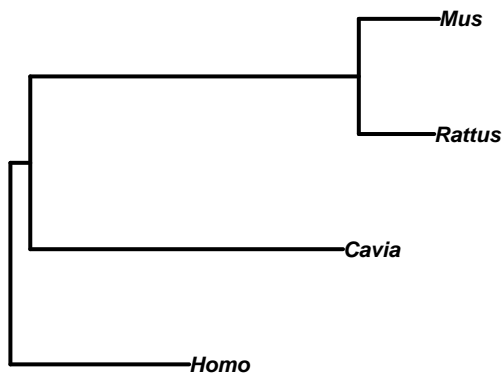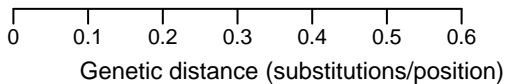

Supplement: pone.0096032.s006.pdf [file pone.0096032.s006.pdf]
