# Supplementary material for: Development of Rapidly Evolving Intron Markers to Estimate Multilocus Species Trees of Rodents
Source: PubMed Central journal article supplement (PMC4012946; doi:10.1371/journal.pone.0096032), 2014-05-07
Supplement: pone.0096032.s001.pdf [file pone.0096032.s001.pdf]

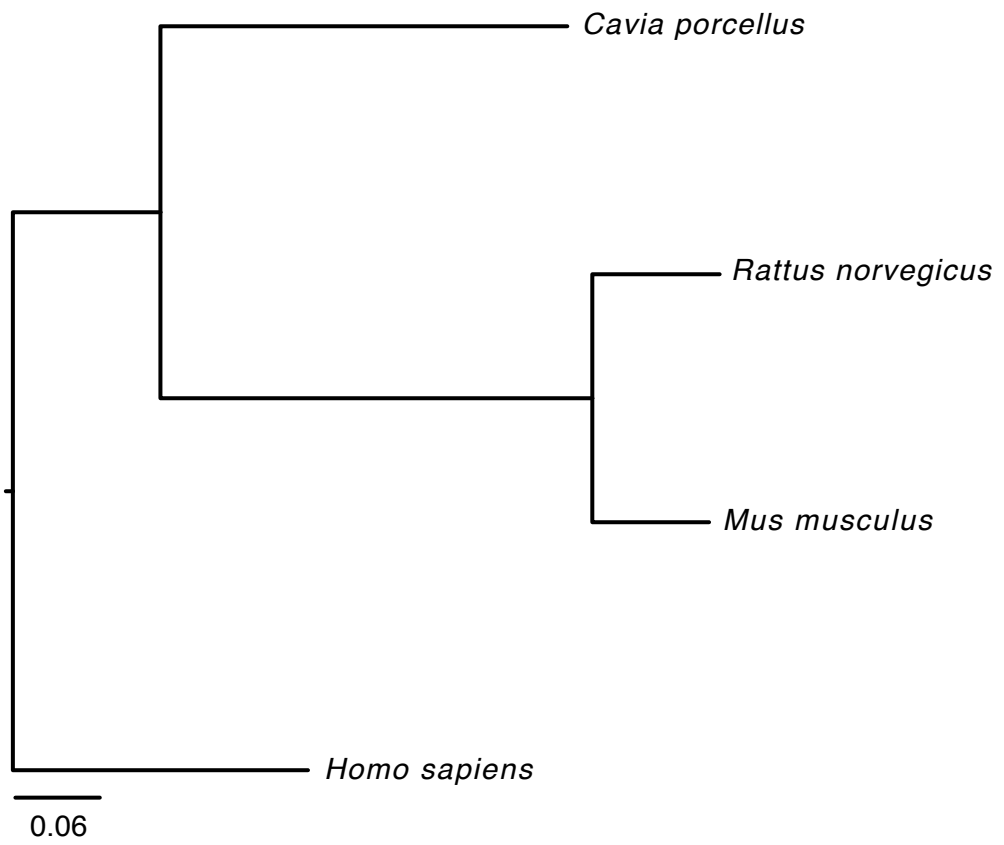

**Figure S1.** Maximum-likelihood phylogenetic tree of 2288 concatenated rodent introns. The scale bar is in substitutions per position.
