# Supplementary material for: Development of Rapidly Evolving Intron Markers to Estimate Multilocus Species Trees of Rodents
Source: PubMed Central journal article supplement (PMC4012946; doi:10.1371/journal.pone.0096032), 2014-05-07
Supplement: pone.0096032.s002.pdf [file pone.0096032.s002.pdf]

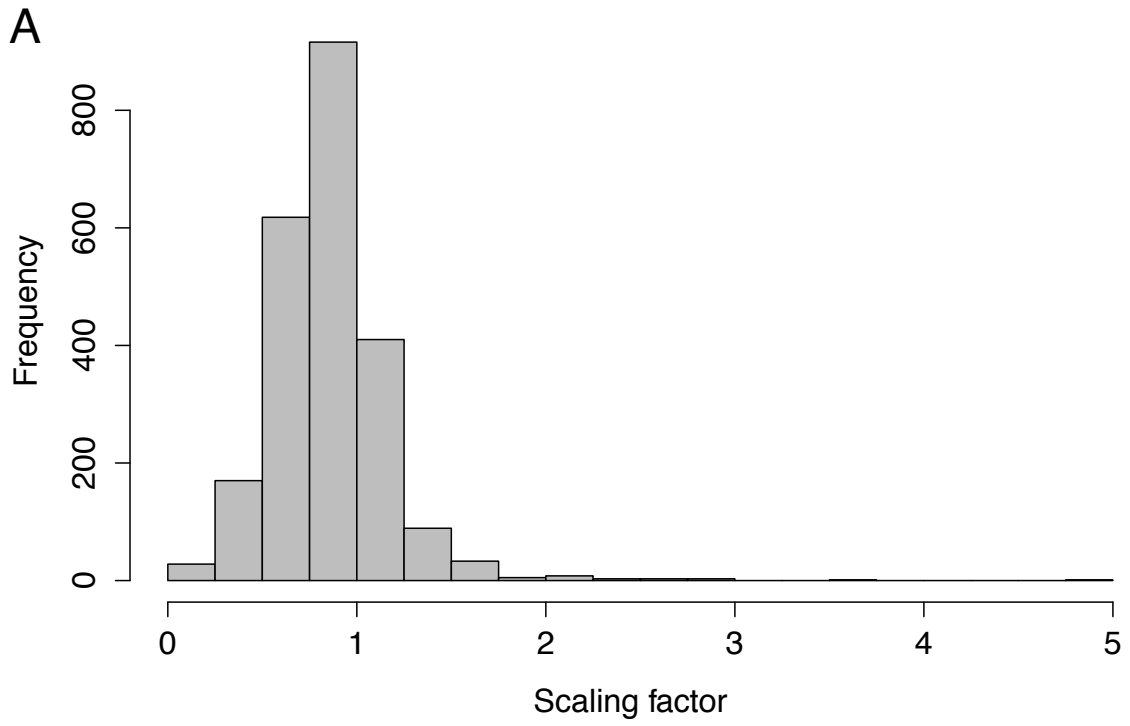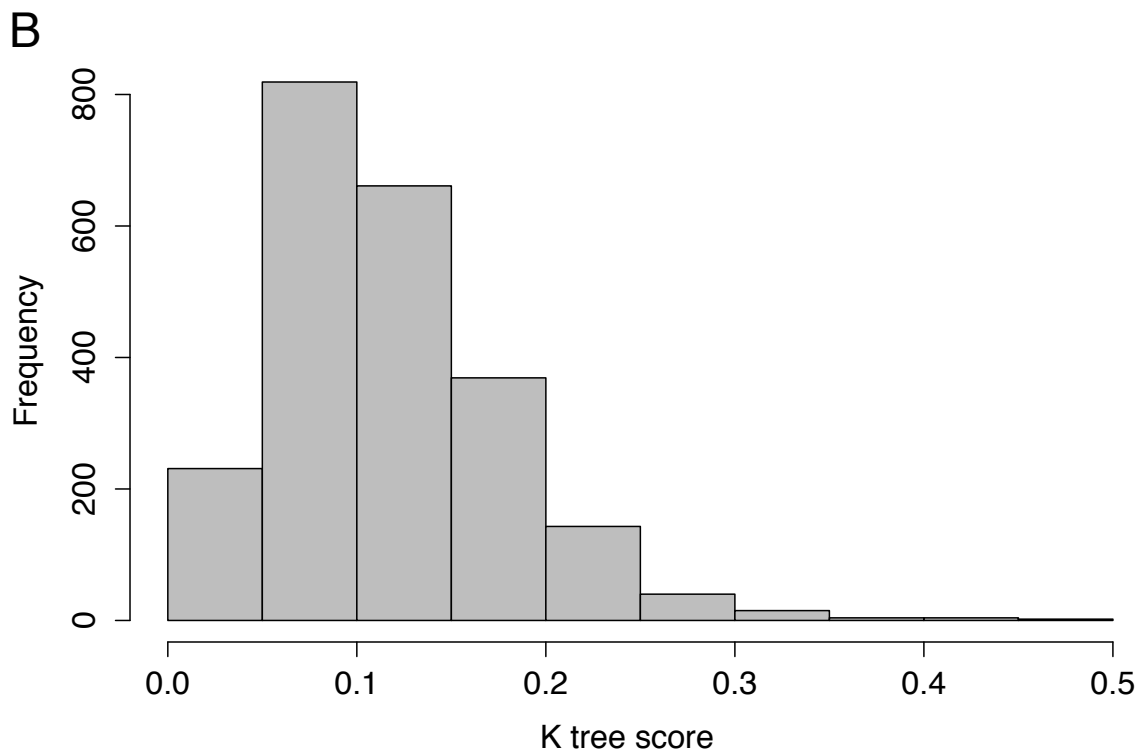

**Figure S2.** Distribution of scaling factor (A) and K tree score (B) in 2288 rodent introns.
