# Supplementary material for: Development of Rapidly Evolving Intron Markers to Estimate Multilocus Species Trees of Rodents
Source: PubMed Central journal article supplement (PMC4012946; doi:10.1371/journal.pone.0096032), 2014-05-07
Supplement: pone.0096032.s004.pdf [file pone.0096032.s004.pdf]

**Table S2.** GenBank accession numbers.

|                                  | Abcb9-2  | Agxt-10  | Catsper3-5 | Dhcr24-7 | Ivd-8    | Nadsyn1-4 | Rras-4   | Smo-9    | Trpv4-8  | Wls-7    |
|----------------------------------|----------|----------|------------|----------|----------|-----------|----------|----------|----------|----------|
| <i>Hydrochoerus hydrochaeris</i> | KF129522 | KF129531 | KF129537   | KF129544 | KF129554 |           | KF129572 | KF129577 | KF129585 | KF129591 |
| <i>Proechimys guairae</i>        | KF129523 | KF129532 |            | KF129545 | KF129555 | KF129563  |          |          |          | KF129592 |
| <i>Apodemus flavicollis</i>      | KF129524 | KF129533 |            | KF129546 | KF129556 | KF129564  | KF129573 | KF129578 | KF129586 | KF129593 |
| <i>Sciurus vulgaris</i>          | KF129525 |          | KF129538   | KF129547 | KF129557 | KF129565  | KF129574 | KF129579 | KF129587 | KF129594 |
| <i>Myocastor coypus</i>          | KF129526 |          |            | KF129548 |          | KF129566  |          |          |          |          |
| <i>Atherurus macrourus</i>       | KF129527 | KF129534 | KF129539   | KF129549 | KF129558 | KF129567  |          | KF129580 | KF129588 | KF129595 |
| <i>Octodontomys gliroides</i>    | KF129528 | KF129535 | KF129540   | KF129550 | KF129559 | KF129568  |          | KF129581 | KF129589 | KF129596 |
| <i>Glis glis</i>                 |          |          | KF129541   | KF129551 | KF129560 | KF129569  |          | KF129582 |          | KF129597 |
| <i>Cynomys ludovicianus</i>      | KF129529 |          | KF129542   | KF129552 | KF129561 | KF129570  | KF129575 | KF129583 | KF129590 | KF129598 |
| <i>Microtus duodecimcostatus</i> | KF129530 | KF129536 | KF129543   | KF129553 | KF129562 | KF129571  | KF129576 | KF129584 |          | KF129599 |
| <i>Microtus lusitanicus</i>      | KF916621 | KF916622 | KF916623   | KF916624 | KF916625 | KF916626  | KF916627 | KF916628 |          | KF916629 |
