# Supplementary material for: Development of Rapidly Evolving Intron Markers to Estimate Multilocus Species Trees of Rodents
Source: PubMed Central journal article supplement (PMC4012946; doi:10.1371/journal.pone.0096032), 2014-05-07
Supplement: pone.0096032.s005.pdf [file pone.0096032.s005.pdf]

**Table S3.** Nucleotide substitution model and type of molecular clock used in the Bayesian analysis of the rodent introns.

| Intron name | Nucleotide substitution model | Molecular clock |
|-------------|-------------------------------|-----------------|
| Abcb9-2     | HKY+I                         | Relaxed         |
| Agxt-10     | HKY+G                         | Relaxed         |
| Catsper3-5  | HKY+G                         | Relaxed         |
| Dhcr24-7    | GTR+I                         | Relaxed         |
| Ivd-8       | HKY+G                         | Strict          |
| Nadsyn1-4   | HKY+G                         | Relaxed         |
| Rras-4      | HKY+G                         | Strict          |
| Smo-9       | HKY+G                         | Relaxed         |
| Trpv4-8     | GTR+G                         | Strict          |
| Wls-7       | GTR+G                         | Relaxed         |
